# Supplementary material
Source: Research Square preprint supplement (doi:10.21203/rs.3.rs-9689802/v1)
Supplement: Supplementary file 1 [file 36315e18d89668d6ce6b4bf3.xlsx]

## Sheet: Supplementary Table 1
Supplementary Table 1
Overview of RNA-Seq results for samples in the present study.
Sample ID	Treatment	Week	Number of raw reads1	Number of filtered reads2	Percent of filtered reads3	Percent of uniquely mapped reads4	Percent of multi-mapped reads5	Percent of overall mapped reads6	Library7
C_W1_T4_6	Control	1	77210880	75801552	98.17	80.08	8.3	92.63	F121669
C_W1_T4_5	Control	1	50180582	49040612	97.73	78.94	7.88	91.4	F121656
C_W1_T3_4	Control	1	90810228	87561252	96.42	78.76	8.48	92.08	F121723
C_W1_T2_3	Control	1	81925756	79141788	96.6	79.97	7.77	92.65	F121718
C_W1_T1_2	Control	1	65166444	64211340	98.53	79.34	8.03	91.91	F121681
C_W1_T1_1	Control	1	60912954	59939886	98.4	78.78	7.78	91.38	F121682
C_W2_T4_6	Control	2	64275338	63210234	98.34	79.51	8.15	92.16	F121688
C_W2_T4_5	Control	2	56129030	54255080	96.66	80.04	7.86	92.43	F121728
C_W2_T3_4	Control	2	72364506	70454750	97.36	77.66	7.59	90.76	F121654
C_W2_T2_3	Control	2	110546760	107010310	96.8	79.51	7.75	92	F121712
C_W2_T2_2	Control	2	208348822	204529054	98.17	79.96	8.25	92.26	F121663
C_W2_T1_1	Control	2	57877496	56475540	97.58	78.49	7.73	91.35	F121658
C_W4_T4_6	Control	4	65762140	64776914	98.5	80.08	8.12	92.5	F121690
C_W4_T4_5	Control	4	69097672	67552962	97.76	79.96	8.44	92.92	F121732
C_W4_T3_4	Control	4	64698844	63483266	98.12	80.33	7.95	92.66	F121670
C_W4_T2_3	Control	4	84752368	83452514	98.47	80.32	8.06	92.64	F121685
C_W4_T1_2	Control	4	67807556	66620226	98.25	80.75	8.37	93.3	F121702
C_W4_T1_1	Control	4	63819778	63100824	98.87	77.9	8.3	91.19	F121675
C_W8_T4_6	Control	8	102295454	99044004	96.82	79.66	7.97	92.27	F121716
C_W8_T3_4	Control	8	68148692	66680052	97.84	79.99	8.15	92.8	F121664
C_W8_T3_3	Control	8	112487050	110608574	98.33	80.38	7.85	92.36	F121686
C_W8_T2_5	Control	8	117945492	114306008	96.91	79.68	7.83	92.41	F121726
C_W8_T2_2	Control	8	63632876	62660960	98.47	79.83	8.18	92.7	F121700
C_W8_T1_1	Control	8	46184338	44723382	96.84	80.36	8.18	93.1	F121722
C_W12_T4_6	Control	12	57631272	56675256	98.34	79.02	8.26	92.4	F121705
C_W12_T4_5	Control	12	63260420	62321362	98.52	80.78	8.25	93.51	F121693
C_W12_T3_4	Control	12	79913570	77358376	96.8	80.18	7.8	92.41	F121720
C_W12_T2_3	Control	12	87785252	84959182	96.78	81.03	7.97	93.25	F121719
C_W12_T2_2	Control	12	337938864	333859390	98.79	79.65	8.75	92.53	F121662
C_W12_T1_1	Control	12	57606378	56410338	97.92	81.27	7.84	93.11	F121734
C_W16_T3_6	Control	16	41744384	40308254	96.56	79.51	8.58	92.8	F121725
C_W16_T3_5	Control	16	76894376	75696370	98.44	80.81	8.28	93.43	F121704
C_W16_T2_4	Control	16	242806980	240313280	98.97	77.17	8.77	90.85	F121676
C_w16_T2_3	Control	16	53323612	52071236	97.65	78.15	7.68	91.22	F121657
C_W16_T1_3	Control	16	57345974	56380252	98.32	80.68	8.38	92.8	F121671
C_W16_T1_1	Control	16	100551044	99512988	98.97	79.62	8.75	92.59	F121678
C_W20_T4_4	Control	20	91735750	88985534	97	81.24	7.86	93.44	F121714
C_W20_T3_3	Control	20	87827216	86420672	98.4	78.25	8.31	91.18	F121687
C_W20_T3_1	Control	20	68736548	66702534	97.04	78.83	8.15	91.93	F121717
C_W20_T2_2	Control	20	65693908	64673830	98.45	80.17	8.08	92.61	F121707
Res_W1_T4_BB81	Resected	1	111371276	109639966	98.45	80.55	8.22	92.96	F121689
Res_W1_T3_BB5F	Resected	1	49431398	48421104	97.96	83.02	8.08	94.61	F121735
Res_W1_T3_BB35	Resected	1	30516576	29955876	98.16	80.93	7.7	92.63	F121672
Res_W1_T2_BB78	Resected	1	61626296	60645550	98.41	79.98	7.92	92.31	F121694
Res_W1_T2_BB32	Resected	1	131256064	129893582	98.96	78.06	8.04	91.14	F121673
Res_W1_T1_BB70	Resected	1	100622364	99086680	98.47	81.01	7.91	93.34	F121708
Res_W1_T1_BB50	Resected	1	44008578	43092368	97.92	79.37	8.01	92.11	F121733
Res_W2_T4_BB75	Resected	2	78984246	77828608	98.54	80.16	8.02	92.69	F121698
Res_W2_T3_BB7D	Resected	2	76201692	74982012	98.4	79.76	8.09	92.5	F121695
Res_W2_T3_BB31	Resected	2	73450158	72073552	98.13	79.47	7.65	91.54	F121692
Res_W2_T2_BB67	Resected	2	88816530	87250306	98.24	80.25	8.24	92.54	F121665
Res_W2_T2_BB65	Resected	2	82663718	81441086	98.52	80.32	7.73	92.31	F121691
Res_W4_T4_BB84	Resected	4	78028734	77133412	98.85	79.75	8.37	92.59	F121677
Res_W4_T3_BB6B	Resected	4	57206864	56342502	98.49	79.97	8.16	92.07	F121683
Res_W4_T3_BB5E	Resected	4	59540450	58657994	98.52	80.09	8.11	92.7	F121699
Res_W4_T2_BB5C	Resected	4	73609912	72882542	99.01	79.33	7.89	91.87	F121679
Res_W4_T2_BB4D	Resected	4	122658924	120900338	98.57	78.14	8.19	91.64	F121684
Res_W4_T1_BB63	Resected	4	51942492	50994546	98.18	79.6	7.95	92.14	F121731
Res_W8_T4_BB6E	Resected	8	57405324	56728812	98.82	79.5	7.41	91.12	F121674
Res_W8_T3_BB3D	Resected	8	49747668	48831968	98.16	80.78	7.87	93.17	F121730
Res_W8_T3_BB24	Resected	8	50786494	49266746	97.01	79.17	7.79	91.62	F121711
Res_W8_T2_BB6D	Resected	8	98025378	96394824	98.34	79.75	8.25	92.13	F121680
Res_W8_T1_BB69	Resected	8	40430130	38776334	95.91	79.06	8.22	92.17	F121727
Res_W8_T4_BB71	Resected	8	56966100	55998778	98.3	75.51	7.58	89.24	F121668
Res_W12_T3_BB7B	Resected	12	66372100	65281628	98.36	80.52	8.21	93.47	F121706
Res_W12_T3_BB49	Resected	12	84184008	82741634	98.29	81.47	8.44	93.87	F121703
Res_W12_T2_BB33C	Resected	12	62035884	60501126	97.53	78.43	7.55	90.89	F121655
Res_W12_T2_BB30	Resected	12	44190790	43369794	98.14	79.94	7.27	91.66	F121653
Res_W12_T1_BB42	Resected	12	105779410	103873110	98.2	80.9	7.67	92.33	F121666
Res_W12_T1_BB2C	Resected	12	88372678	86443478	97.82	80.8	7.46	92.59	F121661
Res_W16_T3_BB68	Resected	16	74452132	73310392	98.47	79.9	8.66	92.81	F121709
Res_W16_T3_BB3F	Resected	16	110626568	108853888	98.4	80.76	8.37	93.15	F121667
Res_W16_T2_BB6F	Resected	16	36946076	35615916	96.4	79.7	7.93	92.6	F121724
Res_W16_T2_BB37	Resected	16	72209436	69693638	96.52	79.24	8.13	92.35	F121729
Res_W16_T1_BB76	Resected	16	50455678	48850864	96.82	80.35	7.71	92.4	F121721
Res_W16_T1_BB5B	Resected	16	83153116	81096388	97.53	78.73	7.82	91.36	F121660
Res_W20_T_BB7F	Resected	20	99323656	95333662	95.98	79.8	7.97	92.18	F121715
Res_W20_T_BB5A	Resected	20	83469946	82181120	98.46	78.99	8.33	91.85	F121697
Res_W20_T_BB54	Resected	20	65135172	64125526	98.45	80.73	7.57	92.52	F121696
Res_w20_T_BB51	Resected	20	51092582	49997218	97.86	79.88	7.36	91.91	F121659
Res_W20_T_BB2B	Resected	20	66004030	64894642	98.32	80.35	7.77	92.66	F121701
Res_W20_T_BB24	Resected	20	104855958	102882402	98.12	80.71	8.12	93.21	F121710
1Total number of reads generated by Illumina (sequence length: 150 bp).
2Total number of reads (paired and quality-passed) retained after filtering with Trimmomatic and used for mapping.
3Percentage of reads (paired and quality-passed) retained after filtering with Trimmomatic relative to the total number of raw reads.
4Percentage of the Trimmomatic-filtered reads that were uniquely mapped (i.e., aligned to a single genomic location) to the Atlantic salmon genome.
5Percentage of the Trimmomatic-filtered reads that were multi-mapped (i.e., aligned to more than one genomic location) to the Atlantic salmon genome.
6Percentage of Trimmomatic-filtered reads that mapped to the Atlantic salmon genome overall (i.e., reads with at least one reported alignment, including both uniquely and multi-mapped reads).
7Accession number of sequencing results for each sample submitted to the NCBI SRA database.

## Sheet: Supplementary Table 2
Supplementary Table 2
Complete list of differentially expressed genes between Resected and Control filaments over the 20-week post-resection period.
Gene ID1	Genomic location2	Annotation3	Gene Description4	Gene symbol [Salmo salar]5	Gene symbol [Homo sapiens]6	Log2-transformed fold-change (Resected/Control)7							Cluster8
						Week 1	Week 2	Week 4	Week 8	Week 12	Week 16	Week 20
MSTRG.42316	ssa29: 23893137-23897819	BLASTx	DNA repair protein XRCC2 [Mus musculus]		XRCC2	24.1869							1
MSTRG.46490	NW_025549776.1: 8394-77809	BLASTx	Tudor domain-containing protein 3 [Danio rerio]		TDRD3	24.0613							1
MSTRG.17717	ssa10: 61431939-61497157	BLASTx	Fatty acid hydroxylase domain-containing protein 2 [Macaca fascicularis]		FAXDC2	23.698							1
MSTRG.34351	ssa20: 35270816-35303841	BLASTx	Erlin-2 [Danio rerio]		ERLIN2	23.4286							1
MSTRG.28746	ssa16: 44525003-44530734	BLASTx	Zinc transporter ZIP3 [Bos taurus]		SLC39A3	7.92294	-6.41553						1
MSTRG.34161	ssa20: 26952360-26959161	BLASTx	L-serine dehydratase/L-threonine deaminase [Mus musculus]		SDS	6.38744							1
MSTRG.38787|LOC106585965	ssa24: 45124341-45180541	Stringtie	integrin alpha-2(LOC106585965) [Salmo salar]	LOC106585965	ITGA2	6.36387	9.9259	8.75781					1
MSTRG.6269|LOC106601254	ssa03: 65499751-65649152	Stringtie|BLASTx	protein TANC2-like(LOC106601254) [Salmo salar]	LOC106601254	TANC2	6.00923							1
MSTRG.37112	ssa22: 62434524-62514202	BLASTx	Protein tyrosine phosphatase domain-containing protein 1 [Danio rerio]		PTPDC1	5.43885							1
MSTRG.33333|LOC106579178	ssa19: 59070129-59126934	Stringtie|BLASTx	myosin-binding protein C, fast-type-like(LOC106579178) [Salmo salar]	LOC106579178	MYBPC2	5.0974							1
MSTRG.12594|LOC106591046	ssa07: 429825-518246	Stringtie	sodium/hydrogen exchanger 9B2-like(LOC106591046) [Salmo salar]	LOC106591046	LOC106591046	5.03934	5.39685						1
MSTRG.21650|LOC106565367	ssa12: 58255883-58295081	Stringtie|BLASTx	myosin heavy chain, fast skeletal muscle(LOC106565367) [Salmo salar]	LOC106565367	--	4.76913							1
MSTRG.32002|LOC106577625	ssa18: 62730242-62799931	Stringtie|BLASTx	multiple PDZ domain protein(LOC106577625) [Salmo salar]	LOC106577625	MPDZ	4.69088							1
MSTRG.39985|LOC106597983	ssa26: 24360477-24370010	Stringtie	intestinal mucin-like protein(LOC106597983) [Salmo salar]	LOC106597983	MUC2	4.38685							1
MSTRG.39986|LOC106587441	ssa26: 24455715-24473393	Stringtie	intestinal mucin-like protein(LOC106587441) [Salmo salar]	LOC106587441	MUC2	4.16993							1
MSTRG.44717	NW_025548462.1: 13208-14514	BLASTx	Serum amyloid A-3 protein [Mus musculus]		SAA3	4.00035							1
MSTRG.45386|LOC106592006	NW_025548830.1: 37598-50992	Stringtie	Sodium/hydrogen exchanger 9B2-like [Salmo salar]	slc9b2	SLC9B2	3.99884	5.26786						1
MSTRG.31142	ssa17: 85235151-85240337	BLASTx	U6 snRNA-associated Sm-like protein LSm8 [Homo sapiens]		LSM5	3.93791							1
MSTRG.4220|tab1	ssa02: 68180686-68199817	Stringtie	TGF-beta activated kinase 1/MAP3K7 binding protein 1(tab1) [Salmo salar]	tab1	TAB1	3.91526							1
MSTRG.19059|LOC106563522	ssa11: 24494759-24536320	Stringtie|BLASTx	myosin-binding protein C, cardiac-type(LOC106563522) [Salmo salar]	LOC106563522	MYBPC3	3.76729	-3.19068						1
MSTRG.23418|LOC106567521	ssa13: 59441097-59606861	Stringtie|BLASTx	rap guanine nucleotide exchange factor 6-like(LOC106567521) [Salmo salar]	LOC106567521	RAPGEF6	3.73723							1
MSTRG.17794	ssa10: 71018868-71035766	BLASTx	Sorting nexin-2 [Homo sapiens]		SNX2	3.49338							1
MSTRG.14157	ssa08: 17770904-17781899	BLASTn	uncharacterized LOC123744198 (LOC123744198), transcript variant X4, mRNA [Salmo salar]	LOC123744198	--	3.39989							1
MSTRG.1385	ssa01: 90847211-90887958	BLASTx	Fascin-2 [Bos taurus]		FSCN2	3.39953	4.87383	5.40953	4.13872	4.91172			1
MSTRG.40007|saa5	ssa26: 25196317-25217199	Stringtie|BLASTx	Serum amyloid A-5 protein(saa5) [Salmo salar]	saa5	SAA2	3.34194	1.17743			1.93079			1
MSTRG.412	ssa01: 24578093-24607440	BLASTx	Transposable element Tcb1 transposase [Caenorhabditis briggsae]		--	3.30734	4.1569	4.56761	3.93021				1
MSTRG.40007|LOC123730763	ssa26: 25196317-25217199	Stringtie|BLASTx	Serum amyloid A-5 protein(saa5) [Salmo salar]	saa5	SAA2	3.2111	1.47478						1
MSTRG.28426	ssa16: 26678248-26679963	BLASTn	uncharacterized LOC106573482 [Salmo salar]	LOC106573482	--	3.16653							1
MSTRG.39991	ssa26: 24587236-24653389	BLASTn	CD81 antigen-like [Salmo salar]	cd81	CD81	3.15971							1
MSTRG.13657	ssa07: 55912929-55925092	BLASTx	Cysteine-rich protein 2 [Rattus norvegicus]		CRIP2	2.99856							1
MSTRG.14735|lpp60	ssa09: 22483328-22521583	Stringtie|BLASTx	60 kDa lysophospholipase(lpp60) [Salmo salar]	lpp60	PAFAH2	2.98194	1.58348						1
MSTRG.40759|LOC106588358	ssa27: 11482207-11530437	Stringtie|BLASTx	MTSS I-BAR domain containing 1(LOC106588358) [Salmo salar]	LOC106588358	MTSS1	2.8944							1
MSTRG.35476	ssa21: 16743007-16744076	BLASTn	neurabin-1-like (LOC106581761), transcript variant X6, mRNA [Salmo salar]	LOC106581761	PPP1R9A	2.89089							1
LOC106594689|LOC106594689	ssa02: 14644458-14646633	Stringtie	sialic acid-binding Ig-like lectin 15(LOC106594689) [Salmo salar]	LOC106594689	SIGLEC15	2.83221	3.22874						1
MSTRG.10541	ssa05: 80031324-80078729	BLASTx	Anoctamin-10 [Danio rerio]		ANO10	2.71749							1
MSTRG.14735	ssa09: 22483328-22521583	Stringtie|BLASTx	60 kDa lysophospholipase(lpp60) [Salmo salar]	lpp60	PAFAH2	2.58793	1.28334						1
MSTRG.13265	ssa07: 36656123-36664354	BLASTx	L-lactate dehydrogenase B chain [Pan troglodytes]		LDHB	2.56546							1
MSTRG.3992|LOC106588483	ssa02: 57294186-57400617	BLASTn	uncharacterized LOC123724000 [Salmo salar]	LOC123724000	--	2.56243							1
MSTRG.24044|LOC106568322	ssa13: 97016027-97060724	Stringtie|BLASTx	protein transport protein Sec31A-like(LOC106568322) [Salmo salar]	LOC106568322	SEC31A	2.53076				3.88243			1
MSTRG.12075|LOC106607757	ssa06: 60930673-60944895	Stringtie	enoyl-[acyl-carrier-protein] reductase, mitochondrial(LOC106607757) [Salmo salar]	LOC106607757	LOC106581738	2.52538							1
MSTRG.35985	ssa21: 54030311-54052601	BLASTx	Tubulin alpha-1A chain [Pan troglodytes]		TUBA1A	2.50583							1
MSTRG.42547|csrnp1b	ssa29: 41423942-41445628	Stringtie|BLASTx	cysteine-serine-rich nuclear protein 1b(csrnp1b) [Salmo salar]	csrnp1b	CSRNP3	2.47223			-2.09917				1
MSTRG.19069|LOC106563558	ssa11: 24866644-24867461	Stringtie	uncharacterized LOC106563558(LOC106563558) [Salmo salar]	LOC106563558	CALCRL	2.41611							1
MSTRG.19030	ssa11: 22199456-22206588	BLASTx	Cytochrome c oxidase subunit 4 isoform 1, mitochondrial [Thunnus obesus]		COX4I1	2.40967							1
MSTRG.40699	ssa27: 9643573-9673289	BLASTx	C-type lectin domain family 4 member M [Hylobates lar]		CLEC4M	2.40415							1
MSTRG.39993|LOC106587473	ssa26: 24675428-24687950	Stringtie	plakophilin-3-like(LOC106587473) [Salmo salar]	LOC106587473	PKP3	2.37392							1
MSTRG.21149|LOC106564958	ssa12: 30884977-30901174	Stringtie|BLASTx	keratin, type I cytoskeletal 13(LOC106564958) [Salmo salar]	LOC106564958	KRT13	2.3496	1.99463	1.73843		1.42304			1
MSTRG.9165|LOC106604262	ssa05: 14898322-15059634	Stringtie	actin filament-associated protein 1-like 1(LOC106604262) [Salmo salar]	LOC106604262	AFAP1L1	2.34264							1
MSTRG.39083	ssa25: 21289047-21341869	BLASTx	Chaperonin GroEL 2 [Azorhizobium caulinodans ORS 571]		--	2.33895							1
MSTRG.39095|tnfaip6	ssa25: 21984489-21993348	Stringtie	Tumor necrosis factor-inducible gene 6 protein [Salmo salar]	tnfaip6	TNFAIP6	2.33407	2.46826	2.95618	1.61263	2.40387			1
MSTRG.12140|LOC100196581	ssa06: 64657961-64659313	Stringtie	basic leucine zipper transcription factor, ATF-like 3 [Salmo salar]	batf3	BATF3	2.249							1
MSTRG.3649|LOC123723997	ssa02: 40751744-40768982	Stringtie	cornifelin-like(LOC123723997) [Salmo salar]	LOC123723997	CNFN	2.24258							1
MSTRG.14290|LOC106610489	ssa08: 22500319-22540385	Stringtie	catenin delta-1(LOC106610489) [Salmo salar]	LOC106610489	CTNND1	2.24193							1
MSTRG.41390|LOC106589308	ssa28: 2521093-2574951	Stringtie|BLASTx	sclerostin domain-containing protein 1-like(LOC106589308) [Salmo salar]	LOC106589308	SOST	2.23764							1
MSTRG.14323	ssa08: 23749440-23751681	BLASTx	Paternally-expressed gene 3 protein [Mus musculus]		PEG3	2.23136				2.30773			1
MSTRG.20971|ppa5	ssa12: 23523883-23528758	Stringtie	Tartrate-resistant acid phosphatase type 5(ppa5) [Salmo salar]	ppa5	SLC4A3	2.21606	2.7047						1
MSTRG.2127	ssa01: 143031101-143038242	BLASTx	Intracellular hyaluronan-binding protein 4 [Homo sapiens]		HABP4	2.21412							1
MSTRG.13358|LOC106609326	ssa07: 41486007-41506969	Stringtie|BLASTx	ethanolamine kinase 1(LOC106609326) [Salmo salar]	LOC106609326	ETNK1	2.19094							1
MSTRG.45658|LOC123735040	NW_025548964.1: 84537-105173	Stringtie	uncharacterized LOC123735040(LOC123735040) [Salmo salar]	LOC123735040	--	2.17245							1
MSTRG.35548	ssa21: 21973544-21991507	BLASTx	Coagulation factor V [Pseudonaja textilis]		F5	2.15032	2.38409						1
MSTRG.19346|LOC106592685	ssa11: 43509665-43559481	Stringtie	TNF receptor-associated factor 6-like(LOC106592685) [Salmo salar]	LOC106592685	TRAF6	2.13047							1
MSTRG.40518	ssa27: 741229-776103	BLASTn	dynein axonemal heavy chain 1 [Oncorhynchus kisutch]		DNAH1	2.11306	1.97151	1.72393	1.80976	1.37944			1
MSTRG.2281|LOC106568355	ssa01: 151130486-151132410	Stringtie	claudin-5(LOC106568355) [Salmo salar]	LOC106568355	CLDN5	2.10456	1.55776	1.48614		1.72447			1
MSTRG.16869|LOC106613510	ssa10: 11839688-11865830	Stringtie	E3 ubiquitin-protein ligase UHRF1(LOC106613510) [Salmo salar]	LOC106613510	UHRF1	2.09018							1
MSTRG.40444	ssa26: 51703397-51728956	BLASTx	Tubulin polymerization-promoting protein family member 3 [Bos taurus]		TPPP3	2.06547							1
MSTRG.42699|LOC123731705	NW_025547070.1: 8932-28093	Stringtie	uncharacterized LOC123731705(LOC123731705) [Salmo salar]	LOC123731705	--	2.00848							1
MSTRG.5618	ssa03: 35815067-35818687	BLASTx	Microsomal glutathione S-transferase 3 [Bos taurus]		MGST3	1.95521							1
MSTRG.12562|mtfr2	ssa06: 93104949-93133795	Stringtie	mitochondrial fission regulator 2(mtfr2) [Salmo salar]	mtfr2	MTFR2	1.95394							1
LOC106579726|LOC106579726	ssa19: 82988658-82994059	Stringtie	musculin(LOC106579726) [Salmo salar]	LOC106579726	MSC	1.94463	1.43459	1.8926		2.12819			1
MSTRG.41190|LOC106588966	ssa27: 32981925-32994592	Stringtie|BLASTx	otolith matrix protein OMM-64-like(LOC106588966) [Salmo salar]	LOC106588966	--	1.94376	2.08012						1
MSTRG.22161|LOC106566027	ssa12: 87648586-87661424	Stringtie	Plakophilin-1 [Salmo salar]	pkp1	PKP1	1.93667	1.44792	1.70664	1.07384	1.17503			1
MSTRG.40928	ssa27: 19797008-19805854	BLASTx	CTP synthase 1 [Danio rerio]		CTPS1	1.86103							1
MSTRG.31782|bub3	ssa18: 44507640-44519553	Stringtie|BLASTx	BUB3 mitotic checkpoint protein(bub3) [Salmo salar]	bub3	BUB3	1.83269							1
MSTRG.27612|LOC106572377	ssa15: 86605506-86613675	Stringtie	histone-lysine N-methyltransferase SUV39H1(LOC106572377) [Salmo salar]	LOC106572377	SUV39H1	1.82185							1
MSTRG.29835|LOC106575194	ssa17: 13368085-13369415	Stringtie	phospholipase A2 inhibitor 31 kDa subunit-like(LOC106575194) [Salmo salar]	LOC106575194	--	1.79853							1
MSTRG.13066|LOC106608894	ssa07: 25426750-25478925	Stringtie	RNA-binding protein 14-like(LOC106608894) [Salmo salar]	LOC106608894	RBM14	1.79452				2.22363			1
MSTRG.28278|trabd	ssa16: 16433722-16490805	Stringtie|BLASTx	TraB domain containing(trabd) [Salmo salar]	trabd	MAPK12	1.7846							1
MSTRG.16246|LOC106612904	ssa09: 125664906-125673797	Stringtie|BLASTx	high affinity immunoglobulin gamma Fc receptor I(LOC106612904) [Salmo salar]	LOC106612904	FCRLA	1.78233							1
MSTRG.20967	ssa12: 23311792-23327161	BLASTn	uncharacterized LOC106589852 (LOC106589852), transcript variant X3, mRNA [Salmo salar]	LOC106589852	--	1.77433							1
MSTRG.22480|LOC106566390	ssa13: 9484691-9646860	Stringtie|BLASTx	aerolysin-like protein(LOC106566390) [Salmo salar]	LOC106566390	--	1.76532	1.00439						1
MSTRG.26907|LOC106571473	ssa15: 42937342-42970721	Stringtie|BLASTx	inverted formin-2-like(LOC106571473) [Salmo salar]	LOC106571473	INF2	1.75675							1
MSTRG.3951|LOC106587847	ssa02: 56397691-56403013	Stringtie|BLASTx	keratin, type I cytoskeletal 13(LOC106587847) [Salmo salar]	LOC106587847	KRT13	1.75166	1.87575						1
LOC106564006|LOC106564006	ssa01: 132315737-132350592	Stringtie	GLIS family zinc finger 3 [Salmo salar]	glis3	GLIS3	1.75158	2.06599	1.94398	1.67051	1.6469	1.23671	1.6193	1
LOC106601384|LOC106601384	NW_025548533.1: 92201-101588	Stringtie	CD5 antigen-like(LOC106601384) [Salmo salar]	LOC106601384	CD5L	1.73454							1
MSTRG.39216|ranbp2	ssa25: 29733837-29756244	Stringtie	RAN binding protein 2(ranbp2) [Salmo salar]	ranbp2	RANBP2	1.71817							1
MSTRG.38298|LOC106585280	ssa24: 17892557-17909285	Stringtie|BLASTx	arginine/serine-rich coiled-coil protein 2(LOC106585280) [Salmo salar]	LOC106585280	RSRC2	1.68813							1
MSTRG.10138	ssa05: 67813291-67818381	BLASTx	B-cell receptor CD22 [Mus musculus]		CD22	1.68334							1
MSTRG.22919|e2f1	ssa13: 32501078-32517893	Stringtie|BLASTx	E2F transcription factor 1(e2f1) [Salmo salar]	e2f1	TGM5	1.65916							1
MSTRG.7271|LOC123742546	ssa04: 5013053-5066057	Stringtie	thrombospondin type-1 domain-containing protein 4-like(LOC123742546) [Salmo salar]	LOC123742546	THSD4	1.63931		1.29178					1
MSTRG.28067	ssa15: 109318678-109320765	BLASTn	pleckstrin [Salmo salar]	plekhh3	PLEKHH3	1.62353							1
MSTRG.24854|tbb2a	ssa14: 28697396-28706392	Stringtie	Tubulin beta-2A chain(tbb2a) [Salmo salar]	tbb2a	TBB2A	1.61991							1
MSTRG.22480	ssa13: 9484691-9646860	Stringtie|BLASTx	aerolysin-like protein(LOC106566390) [Salmo salar]	LOC106566390	--	1.60825							1
MSTRG.4659	ssa02: 81276217-81287769	BLASTx	PiggyBac transposable element-derived protein 2 [Homo sapiens]		PGBD2	1.5943							1
MSTRG.7270	ssa04: 5011553-5018871	BLASTx	Uncharacterized PPE family protein PPE24 [Mycobacterium tuberculosis H37Rv]		--	1.59299				2.05531			1
LOC106587206|LOC106587206	ssa26: 18225765-18231887	Stringtie	synaptotagmin-4(LOC106587206) [Salmo salar]	LOC106587206	SYT4	1.58655							1
MSTRG.3676|LOC100136446	ssa02: 42218165-42222195	Stringtie	C type lectin receptor A(LOC100136446) [Salmo salar]	LOC100136446	CLEC4E	1.5836							1
MSTRG.37734|LOC106584632	ssa23: 40594717-40605028	Stringtie	nucleobindin-2-like(LOC106584632) [Salmo salar]	LOC106584632	NUCB2	1.5823							1
MSTRG.19436	ssa11: 52606079-52634544	BLASTx	Tubulin polymerization-promoting protein family member 2 [Homo sapiens]		TPPP2	1.57952							1
MSTRG.5357|tfa	ssa03: 18924571-18932338	Stringtie	transferrin-a(tfa) [Salmo salar]	tfa	TFA	1.5515							1
MSTRG.26958|LOC106571706	ssa15: 45589998-45614172	Stringtie	kinesin light chain 1 [Salmo salar]	klc1	KLC1	1.54992	1.36019	1.31047	1.3269	1.5752			1
MSTRG.10168|LOC106605611	ssa05: 68761766-68770317	Stringtie	uncharacterized LOC106605611(LOC106605611) [Salmo salar]	LOC106605611	--	1.53449							1
MSTRG.22095|LOC106565980	ssa12: 84269636-84278991	Stringtie|BLASTx	ras association domain-containing protein 1(LOC106565980) [Salmo salar]	LOC106565980	RASSF1	1.532							1
MSTRG.17899|ptprz1a	ssa10: 78120480-78196121	Stringtie	protein tyrosine phosphatase receptor type Z1a(ptprz1a) [Salmo salar]	ptprz1a	PTPRZ1	1.53023	1.63764	1.24014	1.38642				1
MSTRG.19120|sdr42e1	ssa11: 27554939-27597841	Stringtie	short chain dehydrogenase/reductase family 42E, member 1(sdr42e1) [Salmo salar]	sdr42e1	SDR42E1	1.52276							1
MSTRG.28563|LOC106573647	ssa16: 35284228-35333824	BLASTx	E3 ubiquitin-protein ligase znrf1 [Danio rerio]		ZNRF1	1.5223							1
LOC106583970|LOC106583970	ssa23: 6284617-6293239	Stringtie	prostaglandin G/H synthase 2(LOC106583970) [Salmo salar]	LOC106583970	PTGS2	1.51387	1.66548	1.60139	1.52708				1
MSTRG.13919|LOC106609896	ssa08: 7166223-7177863	Stringtie|BLASTx	pre-mRNA-processing factor 19(LOC106609896) [Salmo salar]	LOC106609896	PRPF19	1.50793							1
MSTRG.20050|LOC106563569	ssa11: 92554340-92563152	Stringtie	CD276 antigen homolog [Salmo salar]	cd276	CD276	1.48836							1
MSTRG.13480|LOC106609479	ssa07: 46453301-46455038	Stringtie	small nuclear ribonucleoprotein F(LOC106609479) [Salmo salar]	LOC106609479	SNRPF	1.46973							1
MSTRG.23208|elapor1	ssa13: 44474862-44536012	Stringtie|BLASTx	endosome-lysosome associated apoptosis and autophagy regulator 1(elapor1) [Salmo salar]	elapor1	ELAPOR1	1.46032							1
MSTRG.24412|LOC106568721	ssa14: 8920978-8927149	Stringtie	leptin receptor gene-related protein(LOC106568721) [Salmo salar]	LOC106568721	LEPROT	1.45909							1
MSTRG.22376|ccdc115	ssa13: 2956607-2971524	Stringtie|BLASTx	coiled-coil domain containing 115(ccdc115) [Salmo salar]	ccdc115	CCDC115	1.45133							1
MSTRG.30137|kpnb3	ssa17: 26448345-26472568	Stringtie|BLASTx	karyopherin (importin) beta 3(kpnb3) [Salmo salar]	kpnb3	IPO5	1.44488							1
MSTRG.8993|dok3	ssa05: 3279976-3384297	Stringtie|BLASTx	docking protein 3(dok3) [Salmo salar]	dok3	DDX41	1.44424							1
MSTRG.31621|LOC106577215	ssa18: 28571499-28592858	Stringtie|BLASTx	inorganic pyrophosphatase 1(LOC106577215) [Salmo salar]	LOC106577215	PPA2	1.43642							1
MSTRG.33025|mmp25b	ssa19: 44374774-44402946	Stringtie|BLASTx	matrix metallopeptidase 25b(mmp25b) [Salmo salar]	mmp25b	MMP25	1.43208							1
MSTRG.37479|LOC106584298	ssa23: 24309676-24312807	Stringtie|BLASTx	polymeric immunoglobulin receptor(LOC106584298) [Salmo salar]	LOC106584298	PIGR	1.42637							1
MSTRG.17922	ssa10: 79240841-79242308	BLASTn	uncharacterized LOC129862686 (LOC129862686), transcript variant X2, ncRNA [Salvelinus fontinalis]		--	1.42514							1
MSTRG.6784|timp2	ssa03: 86946810-86969015	BLASTx	Metalloproteinase inhibitor 2 [Mus musculus]		TIMP2	1.4228							1
MSTRG.30692|LOC106576235	ssa17: 60717695-60734951	Stringtie	protein ADM2-like(LOC106576235) [Salmo salar]	LOC106576235	ADM2	1.41761							1
MSTRG.38633	ssa24: 35500901-35510748	BLASTx	Aquaporin-3 [Bos taurus]		AQP3	1.4085		1.28308					1
MSTRG.41904|LOC106589898	ssa28: 32251718-32267347	Stringtie	alpha-N-acetylgalactosaminide alpha-2,6-sialyltransferase 2-like(LOC106589898) [Salmo salar]	LOC106589898	ST6GALNAC2	1.40072		1.19458					1
MSTRG.40887|LOC106588586	ssa27: 16675868-16683459	Stringtie	nuclear transport factor 2(LOC106588586) [Salmo salar]	LOC106588586	NUTF2	1.38522							1
MSTRG.14611|LOC106610795	ssa09: 16115626-16151426	Stringtie|BLASTx	glutaminyl-peptide cyclotransferase-like(LOC106610795) [Salmo salar]	LOC106610795	QPCT	1.38195							1
MSTRG.8370|mmp13	ssa04: 53644668-53664717	Stringtie	Collagenase 3(mmp13) [Salmo salar]	mmp13	MMP13	1.37713							1
MSTRG.608	ssa01: 33243721-33248244	BLASTn	uncharacterized LOC115172437 [Salmo trutta]		--	1.3733							1
MSTRG.47127	NW_025550742.1: 1817-10017	BLASTn	sister chromatid cohesion protein PDS5 homolog A-like (LOC123724033), mRNA [Salmo salar]	LOC123724033	PDS5A	1.37249							1
MSTRG.2488	ssa01: 162411612-162438520	BLASTx	Lamin-L(I) [Xenopus laevis]		--	1.36615							1
MSTRG.1097|LOC106608135	ssa01: 72246556-72286638	Stringtie	uncharacterized LOC106608135(LOC106608135) [Salmo salar]	LOC106608135	--	1.35905							1
MSTRG.32362|nagk	ssa18: 77750363-77764341	Stringtie|BLASTx	N-acetylglucosamine kinase(nagk) [Salmo salar]	nagk	NAGK	1.35355							1
MSTRG.3952|LOC106587813	ssa02: 56434298-56438640	Stringtie|BLASTx	keratin, type I cytoskeletal 13(LOC106587813) [Salmo salar]	LOC106587813	KRT13	1.34782	1.14807	1.27896					1
MSTRG.30558|LOC106576061	ssa17: 53214190-53230231	Stringtie|BLASTx	transmembrane protein 209(LOC106576061) [Salmo salar]	LOC106576061	PRDM4	1.34739							1
MSTRG.36230|LOC106582771	ssa22: 11587744-11596951	Stringtie	high mobility group protein HMGI-C-like(LOC106582771) [Salmo salar]	LOC106582771	HMGA2	1.33957	1.02429						1
MSTRG.35483|LOC106581755	ssa21: 17034705-17037336	Stringtie	transcription factor Sp9(LOC106581755) [Salmo salar]	LOC106581755	SP9	1.3338	1.09763						1
MSTRG.32549	ssa19: 814117-830840	Stringtie	Uncharacterized LOC106578254 [Salmo salar]	LOC106578254	--	1.32413		1.53276					1
MSTRG.42401|LOC106590504	ssa29: 27412074-27426765	Stringtie	thyroid hormone receptor-associated protein 3(LOC106590504) [Salmo salar]	LOC106590504	THRAP3	1.32398							1
MSTRG.28485|LOC106573732	ssa16: 31473864-31479581	Stringtie	cleavage and polyadenylation specificity factor subunit 5(LOC106573732) [Salmo salar]	LOC106573732	NUDT21	1.31874							1
MSTRG.17579|LOC106560578	ssa10: 50694367-50724507	Stringtie|BLASTx	prohibitin-2(LOC106560578) [Salmo salar]	LOC106560578	PHB2	1.31823							1
MSTRG.639|prorp	ssa01: 35476000-35506041	Stringtie	protein only RNase P catalytic subunit(prorp) [Salmo salar]	prorp	PRORP	1.29456							1
MSTRG.25230|cib3	ssa14: 44935412-44944007	Stringtie	calcium and integrin binding family member 3(cib3) [Salmo salar]	cib3	CIB3	1.29325	1.05276	1.72686		1.27285			1
MSTRG.6111|LOC106600998	ssa03: 59977392-59993835	Stringtie	integrin beta-3-like(LOC106600998) [Salmo salar]	LOC106600998	ITGB3	1.28903							1
MSTRG.27784	ssa15: 93542309-93554769	BLASTx	Molybdate-anion transporter [Takifugu rubripes]		MFSD5	1.28153							1
MSTRG.39169|il1r2	ssa25: 27816389-27823413	Stringtie|BLASTx	interleukin-1 receptor type II(il1r2) [Salmo salar]	il1r2	IL1R2	1.28027							1
LOC106580236|LOC106580236	ssa02: 32511229-32522999	Stringtie	tetratricopeptide repeat protein 24-like(LOC106580236) [Salmo salar]	LOC106580236	TTC24	1.28025							1
MSTRG.17357	ssa10: 35352532-35357320	BLASTn	cAMP-specific 3',5'-cyclic phosphodiesterase 4D-like [Salvelinus fontinalis]		PDE4D	1.27829							1
MSTRG.25149|ece2a	ssa14: 40543419-40788797	Stringtie	endothelin converting enzyme 2a(ece2a) [Salmo salar]	ece2a	ECE2A	1.27581							1
MSTRG.16246	ssa09: 125664906-125673797	Stringtie|BLASTx	high affinity immunoglobulin gamma Fc receptor I(LOC106612904) [Salmo salar]	LOC106612904	FCRLA	1.27227							1
MSTRG.2267|LOC106567937	ssa01: 150635736-150731093	Stringtie|BLASTx	ras-related protein rab7(LOC106567937) [Salmo salar]	LOC106567937	RAB7A	1.26719							1
MSTRG.41388|LOC106589303	ssa28: 2296000-2336890	Stringtie|BLASTx	ETS translocation variant 4-like(LOC106589303) [Salmo salar]	LOC106589303	ETV4	1.26532	1.34713						1
MSTRG.23201	ssa13: 44372826-44388436	BLASTx	Transposable element Tcb1 transposase [Caenorhabditis briggsae]		--	1.25858							1
MSTRG.36820	ssa22: 43212494-43247738	BLASTx	Transcriptional regulator ATRX homolog [Caenorhabditis elegans]		ATRX	1.25584							1
MSTRG.28749	ssa16: 44637716-44650572	Stringtie|BLASTx	SAS-6 centriolar assembly protein(sass6) [Salmo salar]	sass6	SASS6	1.25532							1
LOC106561209|LOC106561209	ssa10: 93573948-93601656	Stringtie	hepatocyte growth factor-like(LOC106561209) [Salmo salar]	LOC106561209	HGF	1.25413							1
MSTRG.36691|LOC106583570	ssa22: 36327443-36379317	Stringtie	paxillin(LOC106583570) [Salmo salar]	LOC106583570	PXN	1.24484							1
MSTRG.41657|LOC106589607	ssa28: 16086643-16087912	Stringtie	NHP2-like protein 1(LOC106589607) [Salmo salar]	LOC106589607	SNU13	1.24366							1
MSTRG.14321	ssa08: 23669515-23700681	BLASTx	Maternal embryonic leucine zipper kinase [Danio rerio]		MELK	1.24344							1
MSTRG.12994|slc7a7	ssa07: 23793756-23810995	Stringtie	solute carrier family 7 member 7(slc7a7) [Salmo salar]	slc7a7	SLC7A7	1.23992							1
MSTRG.35395|LOC106581733	ssa21: 11913376-11916423	Stringtie	uncharacterized LOC106581733(LOC106581733) [Salmo salar]	LOC106581733	--	1.23182							1
MSTRG.5419	ssa03: 23229676-23232756	BLASTx	Centromere protein L [Danio rerio]		CENPL	1.2294							1
MSTRG.10712|LOC123743065	ssa05: 88632930-88642627	Stringtie	transcription factor E2F3-like [Salmo salar]	e2f3	E2F3	1.22754							1
MSTRG.19477|nip7	ssa11: 57755896-57762153	Stringtie|BLASTx	nuclear import 7 homolog (S. cerevisiae)(nip7) [Salmo salar]	nip7	NIP7	1.20704							1
MSTRG.608|LOC106601549	ssa01: 33243721-33248244	BLASTn	uncharacterized LOC115172437 [Salmo trutta]		--	1.20157							1
MSTRG.36515|mep50	ssa22: 28557376-28566773	Stringtie	Methylosome protein 50(mep50) [Salmo salar]	mep50	WDR77	1.20014							1
MSTRG.37083|LOC106583816	ssa22: 60804031-60907937	Stringtie|BLASTx	filamin-B (LOC106583816) [Salmo salar]	LOC106583816	FLNB	1.19987							1
MSTRG.21465|LOC106565226	ssa12: 48719389-48784701	BLASTx	Keratin, type II cytoskeletal 8 [Danio rerio]		KRT8	1.19982							1
MSTRG.19705|LOC106563019	ssa11: 73479891-73563881	Stringtie	tenascin-like(LOC106563019) [Salmo salar]	LOC106563019	TNC	1.19367	1.42214						1
MSTRG.41531|LOC106589464	ssa28: 11449872-11453987	Stringtie	cytochrome b-245 chaperone 1 homolog [Salmo salar]	cybc1	CYBC1	1.17815							1
MSTRG.6724|LOC106601859	ssa03: 82193764-82218121	Stringtie	uncharacterized serine-rich protein C215.13-like(LOC106601859) [Salmo salar]	LOC106601859	HSPA12A	1.17797							1
LOC106578054|LOC106578054	ssa18: 75713158-75886825	Stringtie	NHS-like protein 2(LOC106578054) [Salmo salar]	LOC106578054	NHSL2	1.17429							1
MSTRG.14126|LOC106610301	ssa08: 16562510-16590970	Stringtie|BLASTx	PC4 and SFRS1-interacting protein(LOC106610301) [Salmo salar]	LOC106610301	PSIP1	1.16839							1
MSTRG.32425|LOC106578109	ssa18: 78717416-78806979	Stringtie	sodium/calcium exchanger 1-like(LOC106578109) [Salmo salar]	LOC106578109	SLC8A1	1.1665							1
MSTRG.691|mipol1	ssa01: 38597599-38671208	Stringtie	mirror-image polydactyly 1(mipol1) [Salmo salar]	mipol1	MIPOL1	1.16536							1
MSTRG.42433	ssa29: 28402240-28419468	BLASTx	Histone-lysine N-methyltransferase EZH2 [Danio rerio]		EZH2	1.15885							1
MSTRG.30114|LOC106575543	ssa17: 25660776-25665855	Stringtie	Uncharacterized LOC106575543 [Salmo salar]	LOC106575543	--	1.1573							1
MSTRG.4213|LOC106590884	ssa02: 67834063-67848416	Stringtie	GRB2-related adapter protein(LOC106590884) [Salmo salar]	LOC106590884	GRAP	1.15663							1
MSTRG.34949|LOC106581080	ssa20: 67976065-67980443	Stringtie	C5a anaphylatoxin chemotactic receptor 1(LOC106581080) [Salmo salar]	LOC106581080	C5AR1	1.15325							1
MSTRG.25510|LOC106570011	ssa14: 62840020-62849011	Stringtie	sialoadhesin(LOC106570011) [Salmo salar]	LOC106570011	SIGLEC1	1.15171							1
MSTRG.9494|LOC106604752	ssa05: 36684690-36697008	Stringtie	DNA ligase 1(LOC106604752) [Salmo salar]	LOC106604752	LIG1	1.15105							1
MSTRG.4319|tk1	ssa02: 70648843-70652956	Stringtie|BLASTx	thymidine kinase 1, soluble(tk1) [Salmo salar]	tk1	TK1	1.14949							1
MSTRG.11327	ssa06: 28178239-28184274	BLASTx	Migration and invasion enhancer 1 [Mus musculus]		MIEN1	1.1432							1
MSTRG.23201|LOC106566995	ssa13: 44372826-44388436	BLASTx	Transposable element Tcb1 transposase [Caenorhabditis briggsae]		--	1.13931							1
MSTRG.35100	ssa20: 81421792-81423047	BLASTn	ras-related protein Rab-38-like (LOC112266188), transcript variant X2, mRNA [Oncorhynchus tshawytscha]		RAB38	1.1382							1
LOC106604535|LOC106604535	ssa05: 26811692-27018292	Stringtie	follistatin-related protein 5(LOC106604535) [Salmo salar]	LOC106604535	FSTL5	1.1298		1.27331					1
MSTRG.1311|LOC106609135	ssa01: 87688751-87705852	Stringtie|BLASTx	ER lumen protein-retaining receptor 2(LOC106609135) [Salmo salar]	LOC106609135	KDELR2	1.125							1
MSTRG.28545|cdk10	ssa16: 34817809-34832174	Stringtie	cyclin-dependent kinase 10(cdk10) [Salmo salar]	cdk10	CDK10	1.12138							1
MSTRG.9249|mcm7	ssa05: 20829607-20854376	Stringtie|BLASTx	minichromosome maintenance complex component 7(mcm7) [Salmo salar]	mcm7	MCM7	1.12116							1
MSTRG.6390|mcm5	ssa03: 68630079-68641468	Stringtie|BLASTx	MCM5 minichromosome maintenance deficient 5 (S. cerevisiae)(mcm5) [Salmo salar]	mcm5	MCM5	1.11832							1
MSTRG.9119	ssa05: 12292474-12320152	BLASTx	Solute carrier family 25 member 53 [Homo sapiens]		SLC25A53	1.11709	1.00745						1
MSTRG.10634|LOC106595451	ssa05: 85171628-85181572	Stringtie	centrosomal protein of 72 kDa-like(LOC106595451) [Salmo salar]	LOC106595451	CEP72	1.11227							1
MSTRG.6785	ssa03: 86966770-86968557	BLASTn	metalloproteinase inhibitor 2-like [Salmo trutta]		TIMP2	1.11154	1.02719						1
MSTRG.2694|LOC106573207	ssa02: 4030408-4040862	Stringtie	transcription factor E2F3 [Salmo salar]	e2f3	E2F3	1.11096							1
MSTRG.17829|pdia3	ssa10: 73556526-73570157	Stringtie|BLASTx	protein disulfide isomerase family A, member 3(pdia3) [Salmo salar]	pdia3	PDIA3	1.10452							1
MSTRG.5455|LOC106599341	ssa03: 26281391-26292164	Stringtie	carbonic anhydrase(LOC106599341) [Salmo salar]	LOC106599341	CA4	1.10251		1.03017					1
MSTRG.5213|LOC106599184	ssa03: 13554984-13583474	Stringtie	CMRF35-like molecule 5(LOC106597639) [Salmo salar]	LOC106597639	FCAMR	1.10216							1
MSTRG.8336|LOC106603589	ssa04: 52549652-52613077	Stringtie|BLASTx	protein POF1B-like(LOC106603589) [Salmo salar]	LOC106603589	POF1B	1.10084	1.17034	1.26694					1
MSTRG.12817|cssa07h11orf68	ssa07: 15046418-15062750	Stringtie|BLASTx	chromosome ssa07 C11orf68 homolog(cssa07h11orf68) [Salmo salar]	cssa07h11orf68	C11orf68	1.09768							1
MSTRG.25472|LOC106570043	ssa14: 61392140-61408494	Stringtie|BLASTx	PR domain zinc finger protein 1-like(LOC106570043) [Salmo salar]	LOC106570043	PRDM1	1.09269							1
MSTRG.17238|LOC106613943	ssa10: 29683681-29693809	Stringtie|BLASTx	dolichyl-diphosphooligosaccharide--protein glycosyltransferase subunit DAD1(LOC106613943) [Salmo salar]	LOC106613943	DAD1	1.0925							1
MSTRG.24714|LOC106569045	ssa14: 20680224-20694177	Stringtie	cytochrome P450 7B1(LOC106569045) [Salmo salar]	LOC106569045	CYP7B1	1.09247							1
MSTRG.12302|ostm1	ssa06: 72972235-72981904	Stringtie|BLASTx	osteoclastogenesis associated transmembrane protein 1(ostm1) [Salmo salar]	ostm1	OSTM1	1.09037							1
MSTRG.40676	ssa27: 8814920-8851439	BLASTx	Sialic acid-binding Ig-like lectin 6 [Homo sapiens]		SIGLEC6	1.08938	1.23419						1
MSTRG.4007|LOC106587218	ssa02: 57816044-57831381	Stringtie|BLASTx	uncharacterized LOC106587218(LOC106587218) [Salmo salar]	LOC106587218	ZNF207	1.08857							1
MSTRG.32929	ssa19: 36733290-36814366	BLASTx	Rhodopsin [Rana temporaria]		RHO	1.08646							1
MSTRG.2774|LOC106573558	ssa02: 7631119-7639362	Stringtie	centrosomal protein of 72 kDa(LOC106573558) [Salmo salar]	LOC106573558	CEP72	1.08622							1
MSTRG.8127|pura2	ssa04: 42609837-42634304	Stringtie|BLASTx	Adenylosuccinate synthetase isozyme 2(pura2) [Salmo salar]	pura2	EHD1	1.08475							1
MSTRG.33849|LOC106580184	ssa20: 6852855-6956675	Stringtie	Semaphorin-6A [Salmo salar]	sema6a	SEMA6A	1.08436	1.12985	1.23103		1.11604		1.05182	1
MSTRG.711|LOC106602352	ssa01: 39353815-39360726	Stringtie	cyclin-K(LOC106602352) [Salmo salar]	LOC106602352	CCNK	1.08238							1
MSTRG.5215|LOC106596963	ssa03: 13583714-13598663	Stringtie	uncharacterized LOC106596963(LOC106596963) [Salmo salar]	LOC106596963	--	1.08205							1
MSTRG.537|LOC106598828	ssa01: 30044898-30049627	Stringtie|BLASTx	tRNA (guanine(37)-N1)-methyltransferase(LOC106598828) [Salmo salar]	LOC106598828	TRMT5	1.07777							1
LOC106585585|LOC106585585	ssa24: 20576330-20584176	Stringtie	stanniocalcin-like(LOC106585585) [Salmo salar]	LOC106585585	STC2	1.07773							1
MSTRG.44579|LOC106595073	NW_025548392.1: 7288-47424	Stringtie	threonine--tRNA ligase 1, cytoplasmic-like(LOC106595073) [Salmo salar]	LOC106595073	TARS1	1.07557							1
MSTRG.17613|selp	ssa10: 52811291-52836331	Stringtie	selectin P(selp) [Salmo salar]	selp	SELP	1.07482	1.0107						1
MSTRG.5213|LOC106597639	ssa03: 13554984-13583474	Stringtie	CMRF35-like molecule 5(LOC106597639) [Salmo salar]	LOC106597639	FCAMR	1.07303							1
MSTRG.10002|LOC106605457	ssa05: 61697118-61712962	Stringtie|BLASTx	zinc transporter ZIP1(LOC106605457) [Salmo salar]	LOC106605457	SLC39A1	1.07229	1.05564						1
MSTRG.41032|LOC106588760	ssa27: 24354613-24362331	Stringtie	small nuclear ribonucleoprotein Sm D1(LOC106588760) [Salmo salar]	LOC106588760	SNRPD1	1.06761							1
LOC123723782|LOC123723782	NW_025547531.1: 1550-27244	Stringtie	ribonucleases P/MRP protein subunit POP1-like(LOC123723782) [Salmo salar]	LOC123723782	POP1	1.06331							1
LOC106610661|LOC106610661	ssa09: 7371470-7391659	Stringtie	transcription factor E2F2(LOC106610661) [Salmo salar]	LOC106610661	E2F2	1.06227							1
MSTRG.18354|tigara	ssa10: 107136942-107144125	BLASTx	Probable fructose-2,6-bisphosphatase TIGAR A [Danio rerio]		TIGAR	1.0622							1
MSTRG.27875	ssa15: 98446874-98452710	BLASTx	Keratin, type II cytoskeletal 8 [Danio rerio]		KRT8	1.05384							1
MSTRG.36854|tm128	ssa22: 44777427-44788853	Stringtie|BLASTx	Transmembrane protein 128(tm128) [Salmo salar]	tm128	TMEM128	1.05378							1
MSTRG.11451|LOC106606979	ssa06: 31983499-31987188	Stringtie|BLASTx	THO complex subunit 4(LOC106606979) [Salmo salar]	LOC106606979	ALYREF	1.04904							1
MSTRG.27925|LOC106572841	ssa15: 101004488-101041372	Stringtie|BLASTx	small nuclear ribonucleoprotein G(LOC106572841) [Salmo salar]	LOC106572841	PLPBP	1.04784							1
MSTRG.16798	ssa10: 2437657-2439239	BLASTx	Nucleolar protein 58 [Homo sapiens]		NOP58	1.04702							1
MSTRG.18132|LOC106561160	ssa10: 91471153-91475873	Stringtie	tetraspanin-3(LOC106561160) [Salmo salar]	LOC106561160	TSPAN3	1.04555	1.60165	1.18757					1
MSTRG.12270|mthfd1l	ssa06: 70367990-70453305	Stringtie	methylenetetrahydrofolate dehydrogenase (NADP+ dependent) 1 like(mthfd1l) [Salmo salar]	mthfd1l	MTHFD1L	1.0455							1
MSTRG.18541|LOC106561665	ssa10: 117023230-117030349	Stringtie	ankyrin repeat and SOCS box protein 13-like(LOC106561665) [Salmo salar]	LOC106561665	ASB13	1.04495							1
MSTRG.7721|LOC106602548	ssa04: 23390374-23392520	Stringtie	coiled-coil domain-containing protein 86-like(LOC106602548) [Salmo salar]	LOC106602548	CCDC86	1.03581							1
MSTRG.29065|LOC106574371	ssa16: 66746760-66748933	Stringtie	phospholipase A2 inhibitor 31 kDa subunit(LOC106574371) [Salmo salar]	LOC106574371	FBLN7	1.03535			2.11031				1
MSTRG.290|1433b	ssa01: 16473166-16495308	BLASTx	14-3-3 protein zeta [Gallus gallus]		YWHAZ	1.03077							1
MSTRG.5678	ssa03: 37492629-37522139	BLASTx	Caspase-1 [Spodoptera frugiperda]		CASP1	1.02933							1
MSTRG.26511	ssa15: 26243503-26287235	BLASTx	Serine/threonine-protein kinase PAK 6 [Homo sapiens]		PAK6	1.02644							1
MSTRG.32633|LOC106578372	ssa19: 7742681-7764944	Stringtie|BLASTx	neutral cholesterol ester hydrolase 1(LOC106578372) [Salmo salar]	LOC106578372	NCEH1	1.02495							1
MSTRG.14929|eif2s1a	ssa09: 36338987-36343223	Stringtie	eukaryotic translation initiation factor 2, subunit 1 alpha a(eif2s1a) [Salmo salar]	eif2s1a	EIF2S1A	1.02457							1
MSTRG.33173|LOC106579330	ssa19: 53733181-53740843	Stringtie	homeobox protein MOX-1-like(LOC106579330) [Salmo salar]	LOC106579330	MEOX1	1.02283	1.46761			1.00514			1
MSTRG.23250|LOC106567318	ssa13: 47650992-47653651	Stringtie	tumor necrosis factor receptor superfamily member 6B(LOC106567318) [Salmo salar]	LOC106567318	TNFRSF6B	1.02249							1
MSTRG.47080|LOC123739581	NW_025550623.1: 34023-49294	Stringtie	isoleucine--tRNA ligase, cytoplasmic-like [Salmo salar]	iars1	IARS1	1.02197							1
MSTRG.41351|LOC106589259	ssa28: 220582-335783	Stringtie	dnaJ homolog subfamily C member 7(LOC106589259) [Salmo salar]	LOC106589259	DNAJC7	1.01407							1
MSTRG.27415|LOC106572115	ssa15: 76029299-76049410	BLASTx	Protein FAM110B [Danio rerio]		FAM110B	1.01228							1
MSTRG.37204|LOC106583937	ssa23: 2967520-3019993	Stringtie|BLASTx	protein spinster homolog 1-like(LOC106583937) [Salmo salar]	LOC106583937	SPNS1	1.01214							1
MSTRG.4094|LOC106589036	ssa02: 62880967-62886577	Stringtie	mpv17-like protein(LOC106589036) [Salmo salar]	LOC106589036	MPV17L	1.0108	1.07702						1
MSTRG.38490|LOC106585413	ssa24: 26926099-26932075	Stringtie	UDP-glucuronosyltransferase 2A2-like(LOC106585413) [Salmo salar]	LOC106585413	UGT2A2	1.01065							1
MSTRG.39312|LOC106586674	ssa25: 35874798-35890228	Stringtie	inhibitor of growth protein 1(LOC106586674) [Salmo salar]	LOC106586674	ING1	1.00992							1
MSTRG.30747|LOC106576293	ssa17: 62085473-62091891	Stringtie|BLASTx	small nuclear ribonucleoprotein F(LOC106576293) [Salmo salar]	LOC106576293	SNRPF	1.00963							1
MSTRG.46483|LOC106594422	NW_025549769.1: 56436-70801	Stringtie	nucleolar protein 58(LOC106594422) [Salmo salar]	LOC106594422	NOP58	1.00889							1
LOC106606803|LOC106606803	ssa06: 25490375-25510557	Stringtie	adhesion G protein-coupled receptor E2-like(LOC106606803) [Salmo salar]	LOC106606803	ADGRE2	1.0082		1.19634					1
MSTRG.24858|dspa	ssa14: 28810767-28834075	Stringtie|BLASTx	desmoplakin a(dspa) [Salmo salar]	dspa	DSP	1.00716							1
MSTRG.29387|ef1b	ssa16: 79478647-79489847	Stringtie	Elongation factor 1-beta(ef1b) [Salmo salar]	ef1b	EF1B	1.00621							1
MSTRG.30656|haaf	ssa17: 58605288-58649724	Stringtie|BLASTx	hemagglutinin/amebocyte aggregation factor-like(LOC106576186) [Salmo salar]	LOC106576186	--	1.00621							1
MSTRG.15494|LOC100195412	ssa09: 75198233-75207811	Stringtie	regulator of G-protein signalling 14(LOC100195412) [Salmo salar]	LOC100195412	RGS14	1.00603							1
MSTRG.30656|LOC106576186	ssa17: 58605288-58649724	Stringtie|BLASTx	hemagglutinin/amebocyte aggregation factor-like(LOC106576186) [Salmo salar]	LOC106576186	--	1.00256							1
MSTRG.5945|LOC106600657	ssa03: 52550354-52661615	Stringtie|BLASTx	ferritin, middle subunit-like(LOC106600954) [Salmo salar]	LOC106600954	FTH1	1.00175							1
MSTRG.27875|LOC106572750	ssa15: 98446874-98452710	BLASTx	Keratin, type II cytoskeletal 8 [Danio rerio]		KRT8	1.00167							1
MSTRG.7896|ruvbl2	ssa04: 33685033-33699947	Stringtie	RuvB-like AAA ATPase 2(ruvbl2) [Salmo salar]	ruvbl2	RUVBL2	1.00164							1
MSTRG.5078	ssa03: 6009146-6197074	BLASTx	Collagen alpha-1(V) chain [Mus musculus]		COL5A1	-1.31829							1
MSTRG.32115	ssa18: 67726602-67728239	BLASTx	NEDD8 [Bos taurus]		NUB1			1.29986		1.10942			1
MSTRG.29487|dmd	ssa16: 83941849-84332395	Stringtie|BLASTx	dystrophin(dmd) [Salmo salar]	dmd	DMD					1.64937			1
MSTRG.2541	ssa01: 165038998-165039573	BLASTn	lysozyme (lyz), transcript variant X1, mRNA [Salmo salar]	lyz	LYZ					-4.1511			1
MSTRG.38377|LOC106585543	ssa24: 21623637-21653738	Stringtie|BLASTx	GTPase-activating protein and VPS9 domain-containing protein 1-like(LOC106585543) [Salmo salar]	LOC106585543	GAPVD1					3.8551			1
MSTRG.24840	ssa14: 27318830-27436536	BLASTx	Laminin subunit alpha-3 [Homo sapiens]		LAMA3				1.10271	1.63279			1
MSTRG.412|si:dkey-248g15.3	ssa01: 24578093-24607440	BLASTx	Transposable element Tcb1 transposase [Caenorhabditis briggsae]		--		1.12017	1.69856	1.13871	1.32156			1
MSTRG.42901|LOC106586951	NW_025547373.1: 14670-31753	Stringtie	trichohyalin(LOC106586951) [Salmo salar]	LOC106586951	TCHH					-1.9241			1
MSTRG.3198|LOC106578696	ssa02: 23392882-23396950	Stringtie	carcinoembryonic antigen-related cell adhesion molecule 20(LOC106578696) [Salmo salar]	LOC106578696	CEACAM20					2.66947			1
MSTRG.32256|LOC106577940	ssa18: 72692316-72720963	Stringtie	H/ACA ribonucleoprotein complex subunit 3(LOC106577940) [Salmo salar]	LOC106577940	NOP10					1.1622			1
MSTRG.45534	NW_025548891.1: 85373-338299	BLASTx	E3 SUMO-protein ligase ZBED1 [Homo sapiens]		ZBED1					3.94205			1
MSTRG.37247|LOC106584005	ssa23: 6603407-6651343	Stringtie|BLASTx	protein Niban 1-like(LOC106584005) [Salmo salar]	LOC106584005	NIBAN1					1.0956			1
MSTRG.18512|LOC106561633	ssa10: 115584698-115631211	Stringtie	uncharacterized LOC106561633(LOC106561633) [Salmo salar]	LOC106561633	--					-2.28715			1
MSTRG.24182	ssa13: 104438478-104442072	BLASTn	sema domain, immunoglobulin domain (Ig), transmembrane domain (TM) and short cytoplasmic domain, (semaphorin) 4D [Salvelinus fontinalis]		SEMA4D		2.35449						1
MSTRG.34299|cldn5a	ssa20: 31415543-31417335	Stringtie	claudin 5a(cldn5a) [Salmo salar]	cldn5a	CLDN5		1.56212	1.04305		1.1159			1
LOC106608464|LOC106608464	ssa07: 4936595-4979792	Stringtie	cytochrome P450 26B1(LOC106608464) [Salmo salar]	LOC106608464	CYP26B1		1.20349	1.47519		1.52652		1.51483	1
MSTRG.14322|adamtsl7	ssa08: 23719106-23749775	Stringtie	ADAMTS-like 7(adamtsl7) [Salmo salar]	adamtsl7	ADAMTSL7					4.37019			1
MSTRG.22480|nattl	ssa13: 9484691-9646860	Stringtie|BLASTx	aerolysin-like protein(LOC106566390) [Salmo salar]	LOC106566390	--					1.50555			1
MSTRG.39113	ssa25: 23514281-23515914	BLASTn	inhibin beta B chain [Oncorhynchus mykiss]		INHBB		1.13891			1.08615			1
MSTRG.18149	ssa10: 92007723-92111057	BLASTx	Semaphorin-4B [Mus musculus]		SEMA4B				1.97269				1
MSTRG.7946	ssa04: 36659513-36673240	BLASTx	Claudin-1 [Bos taurus]		CLDN1					-13.3628		25.945	1
MSTRG.31286	ssa18: 7520443-7560286	BLASTx	Sphingosine-1-phosphate lyase 1 [Homo sapiens]		SGPL1					1.01321			1
MSTRG.47163	NW_025550845.1: 8801-12295	BLASTx	Cytochrome P450 26B1 [Danio rerio]		CYP26B1		1.77403	2.00232		1.58769			1
MSTRG.7049|LOC123741768	ssa03: 98382972-98761650	Stringtie	neoverrucotoxin subunit alpha-like(LOC123741768) [Salmo salar]	LOC123741768	--					2.97847			1
MSTRG.33885|LOC106580142	ssa20: 10632200-10650098	Stringtie	hyaluronan and proteoglycan link protein 1-like (LOC106580142), transcript variant X2, mRNA [Salmo salar]	LOC106580142	HAPLN1			3.07163	2.65627	2.92844	2.71652	1.5866	1
MSTRG.19418	ssa11: 50593157-50612573	BLASTx	Annexin A1 [Homo sapiens]		ANXA1					1.08624			1
MSTRG.13870	ssa08: 4557040-4587618	BLASTx	Transposable element Tcb2 transposase [Caenorhabditis briggsae]		--					1.12475			1
MSTRG.8826|LOC123742506	ssa04: 83957938-83963477	Stringtie	uncharacterized LOC123742506(LOC123742506) [Salmo salar]	LOC123742506	--					4.58156			1
MSTRG.34592|LOC106580732	ssa20: 51130672-51143850	Stringtie	HHIP-like protein 1(LOC106580732) [Salmo salar]	LOC106580732	HHIPL1		1.16772	1.01416					1
LOC106566746|LOC106566746	ssa13: 23686206-23741046	Stringtie	bone morphogenetic protein 7-like(LOC106566746) [Salmo salar]	LOC106566746	BMP7		1.76964						1
MSTRG.36334|LOC106582915	ssa22: 17613343-17634525	Stringtie	bone morphogenetic protein 7(LOC106582915) [Salmo salar]	LOC106582915	BMP7		1.7771	1.44884					1
MSTRG.35973	ssa21: 52006812-52011215	BLASTn	ankyrin repeat domain 50-like [Oncorhynchus keta]		ANKRD50		1.56277						1
MSTRG.34666	ssa20: 53110061-53122615	BLASTn	cylicin-2 [Salmo salar]	cylc2	CYLC2							2.21205	1
MSTRG.45934	NW_025549206.1: 182990-183343	BLASTn	E3 SUMO-protein ligase ZBED1 (LOC122878446), mRNA [Siniperca chuatsi]		ZBED1						-4.06428		1
MSTRG.40462	ssa26: 52254097-52256661	BLASTn	FH1/FH2 domain-containing protein 1-like [Salmo salar]	fhod1	FHOD1			1.35925					1
MSTRG.24259	ssa13: 110395019-110397918	BLASTn	kelch domain-containing protein 8A-like (LOC129815591), transcript variant X6, mRNA [Salvelinus fontinalis]		KLHDC8A			4.08982					1
MSTRG.40628	ssa27: 6656212-6660795	BLASTn	palmdelphin-like [Salvelinus fontinalis]		PALMD			8.78138	-12.0064				1
MSTRG.28910	ssa16: 56216578-56223486	BLASTn	RAB6B, member RAS oncogene family a (rab6ba), transcript variant X2, mRNA [Oncorhynchus keta]		RAB6BA			3.10596					1
MSTRG.37212	ssa23: 3311387-3311806	BLASTn	ribosomal protein S6 kinase alpha-5-like (LOC129813137), mRNA [Salvelinus fontinalis]		RPS6KA5			4.48757					1
MSTRG.4559	ssa02: 78186041-78186603	BLASTn	synaptojanin 1 [Salvelinus fontinalis]		SYNJ1			4.61829					1
MSTRG.19816	ssa11: 80656919-80659883	BLASTn	uncharacterized LOC106563277 [Salmo salar]	LOC106563277	--			2.4258					1
MSTRG.38911	ssa25: 10353102-10354799	BLASTn	uncharacterized LOC106577538 (LOC106577538), ncRNA [Salmo salar]	LOC106577538	--				1.00366				1
MSTRG.32212	ssa18: 71058372-71064669	BLASTn	uncharacterized LOC106578005 (LOC106578005), ncRNA [Salmo salar]	LOC106578005	--		-2.81756	2.336					1
MSTRG.4683	ssa02: 82853415-82863657	BLASTn	uncharacterized LOC106595339 [Salmo salar]	LOC106595339	--			11.5477					1
MSTRG.12646	ssa07: 2803451-2812214	BLASTn	uncharacterized LOC106595406 (LOC106595406), transcript variant X1, mRNA [Salmo salar]	LOC106595406	--			-9.23411					1
MSTRG.43548	NW_025547893.1: 114737-115265	BLASTn	uncharacterized LOC127909205 [Oncorhynchus keta]		--			2.6363					1
MSTRG.26379	ssa15: 14770725-14780452	BLASTn	uncharacterized LOC129817825 [Salvelinus fontinalis]		--		5.38801						1
MSTRG.19641	ssa11: 70850179-70854534	BLASTn	uncharacterized LOC129830165 (LOC129830165), ncRNA [Salvelinus fontinalis]		--			2.90694					1
MSTRG.45076	NW_025548691.1: 45706-47167	BLASTn	uncharacterized LOC129842711 [Salvelinus fontinalis]		--		-3.84292						1
MSTRG.43051	NW_025547491.1: 56653-64510	BLASTx	60S ribosomal protein L18a [Dictyostelium discoideum]		RPL18A			-2.50322					1
MSTRG.18859	ssa11: 14461386-14480901	BLASTx	Adhesion G-protein coupled receptor G5 [Homo sapiens]		ADGRG5		1.87549	3.07781					1
MSTRG.2576	ssa01: 167266823-167298137	BLASTx	Angiopoietin-related protein 2 [Mus musculus]		ANGPTL2				1.44057				1
MSTRG.44892	NW_025548549.1: 517916-528618	BLASTx	ATP synthase subunit f, mitochondrial [Mus musculus]		ATP5MF		-3.27954						1
MSTRG.34468|LOC106580650	ssa20: 43805131-43863647	BLASTx	ATP-binding cassette sub-family C member 3 [Mus musculus]		ABCC3		1.57661						1
MSTRG.20982	ssa12: 23712519-23719078	BLASTx	ATPase GET3 [Danio rerio]		GET3							22.9755	1
MSTRG.6153	ssa03: 61414184-61416498	BLASTx	Bryoporin [Physcomitrium patens]		--			1.71905					1
MSTRG.25232	ssa14: 45000430-45004901	BLASTx	C-C motif chemokine 21 [Macaca mulatta]		CCL21			1.48218					1
MSTRG.39424	ssa25: 42427555-42476677	BLASTx	Calcitonin gene-related peptide type 1 receptor [Oncorhynchus gorbuscha]		CALCRL		11.341						1
MSTRG.41185|LOC106588972	ssa27: 32787698-32802089	BLASTx	CCN family member 4 [Homo sapiens]		CCN4		1.87217						1
MSTRG.2180	ssa01: 145747905-145749845	BLASTx	Chloride intracellular channel protein 6 [Rattus norvegicus]		CLIC6			1.15177					1
MSTRG.25810	ssa14: 78091057-78097447	BLASTx	Coagulation factor V [Bos taurus]		F5			2.38018					1
MSTRG.11056	ssa06: 14768033-14875584	BLASTx	Cytohesin-1 [Homo sapiens]		CYTH1		-1.24701						1
MSTRG.31805	ssa18: 49213291-49268828	BLASTx	DNA-directed RNA polymerase III subunit RPC4 [Homo sapiens]		POLR3D			1.43854					1
MSTRG.5136	ssa03: 10456808-10466425	BLASTx	Exostosin-2 [Homo sapiens]		EXT2			1.03471					1
MSTRG.42795	NW_025547245.1: 22326-33753	BLASTx	Fascin [Mus musculus]		FSCN1		1.20491						1
MSTRG.38647	ssa24: 36197750-36205307	BLASTx	G kinase-anchoring protein 1-B [Xenopus laevis]		GKAP1				1.23482				1
MSTRG.16025	ssa09: 115240987-115259940	BLASTx	Galaxin [Acropora millepora]		--			1.21072					1
MSTRG.35124	ssa20: 82900635-82929926	BLASTx	High affinity choline transporter 1 [Mus musculus]		SLC5A7			1.67786					1
MSTRG.40618	ssa27: 6229828-6263063	BLASTx	Histone-lysine N-methyltransferase EHMT2 [Mus musculus]		EHMT2							22.5581	1
MSTRG.15272	ssa09: 64751338-64767650	BLASTx	Homeobox protein HMX1 [Mus musculus]		HMX1		1.05967						1
MSTRG.22719	ssa13: 23186580-23421364	BLASTx	IQ motif and SEC7 domain-containing protein 1 [Rattus norvegicus]		IQSEC1						1.18299		1
MSTRG.11643	ssa06: 37518537-37546837	BLASTx	KN motif and ankyrin repeat domain-containing protein 2 [Danio rerio]		KANK2						-9.31222		1
MSTRG.42216	ssa29: 17196275-17228891	BLASTx	Late secretory pathway protein AVL9 homolog [Pongo abelii]		AVL9						-6.04403		1
MSTRG.24364	ssa14: 5164472-5186518	BLASTx	LIM and SH3 domain protein 1 [Mus musculus]		LASP1				1.63848				1
MSTRG.22987	ssa13: 35657496-35678634	BLASTx	Lysine-specific demethylase 5C [Mus musculus]		KDM5C		1.28811						1
MSTRG.11697	ssa06: 39193466-39206700	BLASTx	MICAL-like protein 2 [Rattus norvegicus]		MICALL2			1.01206					1
MSTRG.6181	ssa03: 62504033-62517897	BLASTx	MICAL-like protein 2 [Rattus norvegicus]		MICALL2		1.12769						1
MSTRG.37927	ssa23: 49084026-49153732	BLASTx	Mothers against decapentaplegic homolog 3 [Gallus gallus]		SMAD3		1.12451						1
MSTRG.32498	ssa18: 82563937-82624810	BLASTx	Multifunctional procollagen lysine hydroxylase and glycosyltransferase LH3 [Rattus norvegicus]		PLOD3		13.1578						1
MSTRG.10436	ssa05: 76959867-76985279	BLASTx	Nuclear receptor ROR-gamma [Homo sapiens]		RORC				-7.38966				1
MSTRG.8375	ssa04: 53777730-53922073	BLASTx	Nuclear receptor-interacting protein 1 [Mus musculus]		NRIP1							8.91155	1
MSTRG.32980	ssa19: 41033773-41062073	BLASTx	Nucleolar and coiled-body phosphoprotein 1 [Rattus norvegicus]		NOLC1			11.8962					1
MSTRG.19918|npm	ssa11: 88072680-88077073	BLASTx	Nucleophosmin [Gallus gallus]		NPM1			1.23082					1
MSTRG.38985	ssa25: 15034183-15076359	BLASTx	Obg-like ATPase 1 [Rattus norvegicus]		OLA1			1.71457					1
MSTRG.5533	ssa03: 30672171-30756071	BLASTx	Phosphatase and actin regulator 4A [Danio rerio]		PHACTR4						-6.66368		1
MSTRG.17415|bmb	ssa10: 39389600-39402621	BLASTx	Protein brambleberry [Danio rerio]		--		1.55823						1
MSTRG.240	ssa01: 12006449-12046802	BLASTx	Protein CTLA-2-beta [Mus musculus]		--			-4.52338					1
MSTRG.36221	ssa22: 11430467-11459198	BLASTx	Protein DDI1 homolog 2 [Danio rerio]		DDI2		-5.69936						1
MSTRG.36340	ssa22: 17826995-17839356	BLASTx	Protein transport protein Sec61 subunit alpha [Gadus ogac]		SEC61A1			4.46048					1
MSTRG.30031	ssa17: 22514485-22549981	BLASTx	RCC1 and BTB domain-containing protein 1 [Homo sapiens]		RCBTB1		1.13136						1
MSTRG.18255	ssa10: 101720126-101734472	BLASTx	RCC1 domain-containing protein 1 [Homo sapiens]		RCCD1							-1.45421	1
MSTRG.22305	ssa12: 98849756-98855691	BLASTx	Repetitive organellar protein [Plasmodium falciparum 3D7]		--				1.01325				1
MSTRG.41538	ssa28: 11581351-11589900	BLASTx	RING finger protein unkempt homolog [Homo sapiens]		UNK						-3.07072		1
MSTRG.3125	ssa02: 21668288-21674682	BLASTx	Stress protein DDR48 [Saccharomyces cerevisiae S288C]		--		1.1777						1
MSTRG.9013	ssa05: 6080787-6132676	BLASTx	Synaptopodin [Mus musculus]		SYNPO		1.10342						1
MSTRG.23916	ssa13: 91209591-91216661	BLASTx	Transmembrane protein 119 [Homo sapiens]		TMEM119			1.39529					1
MSTRG.38291	ssa24: 17683136-17695048	BLASTx	Transposable element Tcb1 transposase [Caenorhabditis briggsae]		--				1.66181				1
MSTRG.40517	ssa27: 735835-739930	BLASTx	Transposable element Tcb2 transposase [Caenorhabditis briggsae]		--		1.51903		1.31978				1
MSTRG.31872	ssa18: 54733742-54751108	BLASTx	Transposable element Tcb2 transposase [Caenorhabditis briggsae]		--			4.98312					1
MSTRG.21853	ssa12: 67566926-67577108	BLASTx	Ubiquitin carboxyl-terminal hydrolase 49 [Homo sapiens]		USP49						7.91364		1
MSTRG.18596	ssa10: 120138432-120158521	BLASTx	Ubiquitin-conjugating enzyme E2 Q2 [Oryctolagus cuniculus]		UBE2Q2				3.23121				1
MSTRG.43526	NW_025547857.1: 74756-125012	BLASTx	WD repeat domain phosphoinositide-interacting protein 2 [Rattus norvegicus]		WIPI2						6.53653		1
MSTRG.3171	ssa02: 22841317-22849797	BLASTx	Zinc finger protein 574 [Pongo abelii]		ZNF574			-4.8614					1
MSTRG.41947	ssa28: 34472426-34473776	No BLAST hit	--		--			1.61169					1
MSTRG.13306|LOC106609233	ssa07: 38420552-38421512	Stringtie	achaete-scute homolog 3(LOC106609233) [Salmo salar]	LOC106609233	ASCL3			1.35775					1
MSTRG.18881|acsf3	ssa11: 15152978-15213295	Stringtie	acyl-CoA synthetase family member 3(acsf3) [Salmo salar]	acsf3	ACSF3		1.05158						1
MSTRG.11289|LOC106596374	ssa06: 26257035-26267720	Stringtie	aldehyde dehydrogenase family 3 member B1-like(LOC106596374) [Salmo salar]	LOC106596374	ALDH3B1			-1.70758					1
MSTRG.42677|LOC123724010	NW_025547000.1: 9451-28233	Stringtie	alpha- and gamma-adaptin-binding protein p34-like(LOC123724010) [Salmo salar]	LOC123724010	AAGAB			-1.26179					1
MSTRG.40368|aph1b	ssa26: 47833905-47845454	Stringtie	APH1B gamma secretase subunit(aph1b) [Salmo salar]	aph1b	APH1B						-1.14939		1
MSTRG.1367|LOC106609766	ssa01: 89847921-89868755	Stringtie	ATP synthase mitochondrial F1 complex assembly factor 2-like(LOC106609766) [Salmo salar]	LOC106609766	ATPAF2			1.08467					1
MSTRG.36331|LOC106582912	ssa22: 17273881-17534594	Stringtie	cadherin-4-like(LOC106582912) [Salmo salar]	LOC106582912	CDH4			2.06651					1
LOC106598655|LOC106598655	ssa05: 87747018-87755791	Stringtie	CCN family member 3-like(LOC106598655) [Salmo salar]	LOC106598655	CCN3			2.68153					1
LOC106577089|LOC106577089	ssa18: 19892236-19894926	Stringtie	cholesterol 25-hydroxylase-like protein(LOC106577089) [Salmo salar]	LOC106577089	CH25H				1.24117				1
MSTRG.22581|cdk16	ssa13: 14799768-14828590	Stringtie	cyclin-dependent kinase 16(cdk16) [Salmo salar]	cdk16	CDK16			1.54541					1
MSTRG.10081|LOC106605538	ssa05: 64901843-64907483	Stringtie	cytosolic non-specific dipeptidase-like(LOC106605538) [Salmo salar]	LOC106605538	CNDP2			1.97492					1
MSTRG.42379|LOC106590468	ssa29: 26734387-26782481	Stringtie	D(3) dopamine receptor-like(LOC106590468) [Salmo salar]	LOC106590468	DRD3			1.76936					1
MSTRG.47171|LOC106609844	NW_025550857.1: 81878-148987	Stringtie	exportin-T(LOC106609844) [Salmo salar]	LOC106609844	XPOT		1.75838						1
MSTRG.11715|LOC106607325	ssa06: 39816284-39855397	Stringtie	G patch domain-containing protein 8-like(LOC106607325) [Salmo salar]	LOC106607325	GPATCH8			1.26639					1
LOC106586118|LOC106586118	ssa25: 8902941-8923294	Stringtie	gap junction gamma-1 protein-like(LOC106586118) [Salmo salar]	LOC106586118	GJC1			1.08961					1
MSTRG.35492|gtpbp8	ssa21: 17510989-17528359	Stringtie	GTP binding protein 8 (putative)(gtpbp8) [Salmo salar]	gtpbp8	GTPBP8				1.1357				1
LOC106575190|LOC106575190	ssa17: 13437425-13450462	Stringtie	inhibin beta B chain(LOC106575190) [Salmo salar]	LOC106575190	INHBB			1.06112					1
MSTRG.29089|LOC106574237	ssa16: 67384284-67429981	Stringtie	integrin beta-6(LOC106574237) [Salmo salar]	LOC106574237	ITGB6						1.04013		1
MSTRG.16547|LOC106597015	ssa09: 143712903-143718166	Stringtie	major histocompatibility complex class I-related gene protein(LOC106597015) [Salmo salar]	LOC106597015	MR1		1.05665						1
MSTRG.17071|midn	ssa10: 20811855-20844682	Stringtie	midnolin(midn) [Salmo salar]	midn	MIDN							-1.46903	1
MSTRG.220|LOC106560243	ssa01: 10900558-10912950	Stringtie	mitochondrial basic amino acids transporter-like(LOC106560243) [Salmo salar]	LOC106560243	SLC25A29				1.07731				1
MSTRG.4114|LOC106564544	ssa02: 63458471-63470969	Stringtie	myosin phosphatase Rho-interacting protein-like(LOC106564544) [Salmo salar]	LOC106564544	MPRIP		8.25306						1
MSTRG.1178|LOC123744188	ssa01: 77893068-77939553	Stringtie	neurofilament heavy polypeptide-like(LOC123744188) [Salmo salar]	LOC123744188	NEFH		1.89816						1
MSTRG.11530|nfixb	ssa06: 34352283-34491507	Stringtie	nuclear factor I/Xb(nfixb) [Salmo salar]	nfixb	NFIX			1.58064					1
MSTRG.10239|LOC106605558	ssa05: 70412758-70529495	Stringtie	platelet-activating factor acetylhydrolase IB subunit alpha1-like(LOC106605558) [Salmo salar]	LOC106605558	PAFAH1B3				1.15017				1
MSTRG.14118|LOC106610270	ssa08: 15535931-15546839	Stringtie	sperm-associated antigen 5(LOC106610270) [Salmo salar]	LOC106610270	SPAG5						2.63553		1
MSTRG.37175|LOC106583916	ssa23: 2246387-2268324	Stringtie	splicing factor, arginine/serine-rich 19(LOC106583916) [Salmo salar]	LOC106583916	SCAF1		1.48115						1
MSTRG.4127|LOC106589400	ssa02: 63739069-63744057	Stringtie	tartrate-resistant acid phosphatase type 5-like(LOC106589400) [Salmo salar]	LOC106589400	ACP5		1.20882						1
MSTRG.13798|LOC123743819	ssa07: 66488439-66520344	Stringtie	thymidine phosphorylase-like(LOC123743819) [Salmo salar]	LOC123743819	TYMP							2.38955	1
MSTRG.25216|LOC106569613	ssa14: 44267315-44286376	Stringtie	uncharacterized LOC106569613(LOC106569613) [Salmo salar]	LOC106569613	--							1.64526	1
MSTRG.36877|LOC106583595	ssa22: 46584351-46591956	Stringtie	uncharacterized LOC106583595(LOC106583595) [Salmo salar]	LOC106583595	--		1.32343						1
MSTRG.41319|LOC106589117	ssa27: 42186492-42195160	Stringtie	zinc finger protein 706(LOC106589117) [Salmo salar]	LOC106589117	ZNF706		3.02926						1
MSTRG.15691|LOC106612210	ssa09: 86819420-86869473	Stringtie	zinc finger protein 711(LOC106612210) [Salmo salar]	LOC106612210	ZNF711			-1.23026					1
LOC106582504|LOC106582504	ssa21: 53012777-53160118	Stringtie	zinc finger protein 804A(LOC106582504) [Salmo salar]	LOC106582504	ZNF804A			1.15141					1
MSTRG.18966|aldh1a2	ssa11: 20421952-20450241	Stringtie	aldehyde dehydrogenase 1 family, member A2(aldh1a2) [Salmo salar]	aldh1a2	PTGR2			1.21863	1.0048				1
MSTRG.31882|LOC106577503	ssa18: 55349447-55366573	Stringtie	arylsulfatase J-like [Salmo salar]	arsj	ARSJ				1.82192				1
MSTRG.12777|LOC106608575	ssa07: 12316775-12343377	Stringtie	arylsulfatase J-like [Salmo salar]	arsj	ARSJ		1.02671						1
MSTRG.9934|catk	ssa05: 59497395-59504329	Stringtie	Cathepsin K(catk) [Salmo salar]	catk	CTSK		1.31974						1
LOC106599284|LOC106599284	ssa03: 27513013-27564462	Stringtie	collagen alpha-1(XVIII) chain-like(LOC106599284) [Salmo salar]	LOC106599284	COL15A1		1.20169						1
MSTRG.35285|cntn5	ssa20: 95182115-95670673	Stringtie	contactin 5(cntn5) [Salmo salar]	cntn5	CNTN5							1.07462	1
MSTRG.1020|LOC106608700	ssa01: 63875415-63877576	Stringtie	dickkopf-related protein 1 [Salmo salar]	dkk1	DKK1				1.19847				1
LOC106565906|LOC106565906	ssa12: 70965687-70977709	Stringtie	draxin-A-like [Salmo salar]	draxin	DRAXIN			5.31789	5.20024				1
MSTRG.10542|LOC123724061	ssa05: 80195549-80221515	Stringtie	E3 ubiquitin-protein ligase TRIM71-like [Salmo salar]	trim71	TRIM71		1.30419	1.6271					1
MSTRG.15144|emx1	ssa09: 51347242-51353681	Stringtie	empty spiracles homeobox 1(emx1) [Salmo salar]	emx1	EMX1			3.83717	5.53144		6.7314		1
LOC106584266|LOC106584266	ssa23: 33620011-33653909	Stringtie	fibroblast growth factor 10-like [Salmo salar]	fgf10	FGF10		1.22021	1.17596			1.12785		1
LOC106602194|LOC106602194	ssa04: 9542994-9546280	Stringtie	fibroblast growth factor 20(LOC106602194) [Salmo salar]	LOC106602194	FGF20		1.22653						1
MSTRG.37523|LOC106584349	ssa23: 28949442-29021946	Stringtie	glypican-1(LOC106584349) [Salmo salar]	LOC106584349	GPC1		1.39671						1
LOC106607731|LOC106607731	ssa06: 59353661-59422088	Stringtie	heparan sulfate glucosamine 3-O-sulfotransferase 5(LOC106607731) [Salmo salar]	LOC106607731	HS3ST5		2.42197						1
MSTRG.41807|LOC106589762	ssa28: 25977441-25979463	Stringtie	homeobox protein zampogna [Salmo salar]	--	--				1.04745				1
kif1aa|kif1aa	ssa10: 55070698-55231507	Stringtie	kinesin family member 1Aa(kif1aa) [Salmo salar]	kif1aa	KIF1AA			1.09186					1
MSTRG.42293|lama1	ssa29: 21623413-21686714	Stringtie	laminin, alpha 1(lama1) [Salmo salar]	lama1	LAMA1		1.81462	1.04635					1
LOC106573936|LOC106573936	ssa16: 44557102-44572854	Stringtie	multidrug and toxin extrusion protein 1(LOC106573936) [Salmo salar]	LOC106573936	SLC47A1		1.72147	2.0212					1
MSTRG.14442|nid2a	ssa09: 2106810-2211194	Stringtie	nidogen 2a (osteonidogen)(nid2a) [Salmo salar]	nid2a	NID2A		1.10729						1
MSTRG.11698|LOC106607115	ssa06: 39210170-39212710	Stringtie	paired mesoderm homeobox protein 2(LOC106607115) [Salmo salar]	LOC106607115	PRRX2		2.67476						1
MSTRG.33632|LOC106579646	ssa19: 76342768-76354650	Stringtie	Protein APCDD1-like [Salmo salar]	apcdd1	APCDD1		3.82801						1
MSTRG.32159|LOC106577859	ssa18: 69426225-69466600	Stringtie	ras and Rab interactor 2-like(LOC106577859) [Salmo salar]	LOC106577859	RIN2		2.89095						1
MSTRG.18928|LOC106562108	ssa11: 18540244-18542392	Stringtie	ras association domain-containing protein 10-like(LOC106562108) [Salmo salar]	LOC106562108	RASSF10		1.18865						1
MSTRG.39874|LOC106587197	ssa26: 18883329-18885506	Stringtie	ras association domain-containing protein 10-like(LOC106587197) [Salmo salar]	LOC106587197	RASSF10		1.01388						1
MSTRG.35547|rgcc	ssa21: 21958733-21965825	Stringtie	regulator of cell cycle(rgcc) [Salmo salar]	rgcc	RGCC		1.44578	1.16397	1.479				1
rergla|rergla	ssa17: 77230662-77249986	Stringtie	RERG/RAS-like a(rergla) [Salmo salar]	rergla	RERGLA			1.03652					1
LOC106587587|LOC106587587	ssa26: 28538673-28553722	Stringtie	sal-like protein 1(LOC106587587) [Salmo salar]	LOC106587587	SALL1		1.02818						1
MSTRG.23779|LOC106567842	ssa13: 83855738-83869822	Stringtie	sestrin-3(LOC106567842) [Salmo salar]	LOC106567842	SESN3		1.01834						1
MSTRG.39755|tshz3b	ssa26: 12320007-12357177	Stringtie	teashirt zinc finger homeobox 3b(tshz3b) [Salmo salar]	tshz3b	TSHZ3B		1.02756						1
MSTRG.19706|LOC123725184	ssa11: 73575612-73584804	Stringtie	tenascin-like [Salmo salar]	tnc	TNC		1.22346	1.42687					1
MSTRG.10030|LOC106605431	ssa05: 62255526-62274000	Stringtie	thrombospondin-3a-like(LOC106605431) [Salmo salar]	LOC106605431	THBS3		1.13606						1
MSTRG.25915|LOC106570457	ssa14: 84265347-84271321	Stringtie	tissue factor pathway inhibitor 2 [Salmo salar]	tfpi2	TFPI2			1.83219					1
MSTRG.30002|LOC106575455	ssa17: 21236046-21239350	Stringtie	tumor necrosis factor ligand superfamily member 11(LOC106575455) [Salmo salar]	LOC106575455	TNFSF11		1.58902						1
MSTRG.25611|LOC106569899	ssa14: 66655957-66669292	Stringtie	Uncharacterized LOC106569899 [Salmo salar]	LOC106569899	--		1.02873						1
MSTRG.32203|LOC106591393	ssa18: 71075063-71080688	Stringtie	uncharacterized LOC106591393 [Salmo salar]	LOC106591393	--			2.86394					1
MSTRG.16240|LOC106612911	ssa09: 125432264-125433981	Stringtie	uncharacterized membrane protein C3orf80 homolog [Salmo salar]	--	--			1.43206					1
si:ch211-252f13.5|si:ch211-252f13.5	ssa03: 9736178-9741284	Stringtie	Uncharacterized si:ch211-252f13.5 [Salmo salar]	--	--				1.669				1
MSTRG.16891|LOC106613535	ssa10: 12886205-13015357	Stringtie	zinc finger protein GLIS1-like(LOC106613535) [Salmo salar]	LOC106613535	GLIS1		1.42535						1
MSTRG.17799|adpgk	ssa10: 71092177-71108525	Stringtie|BLASTx	ADP-dependent glucokinase(adpgk) [Salmo salar]	adpgk	ADPGK		1.09653						1
MSTRG.21076|LOC106564668	ssa12: 28996188-29020563	Stringtie|BLASTx	jupiter microtubule associated homolog 1(LOC106564668) [Salmo salar]	LOC106564668	GGA3			1.56897					1
MSTRG.9181|LOC106604312	ssa05: 15413849-15505009	Stringtie|BLASTx	ankyrin repeat and KH domain-containing protein 1-like(LOC106604312) [Salmo salar]	LOC106604312	ANKHD1						-3.71396		1
MSTRG.38340|LOC106585600	ssa24: 20012293-20093528	Stringtie|BLASTx	glutamine--fructose-6-phosphate aminotransferase [isomerizing] 1-like(LOC106585600) [Salmo salar]	LOC106585600	AAK1		1.22712						1
MSTRG.11694|LOC106607340	ssa06: 39023893-39057609	Stringtie|BLASTx	axin-1(LOC106607340) [Salmo salar]	LOC106607340	AXIN1						-4.31917		1
MSTRG.9298|LOC106604434	ssa05: 25188508-25196194	Stringtie|BLASTx	C1GALT1-specific chaperone 1(LOC106604434) [Salmo salar]	LOC106604434	C1GALT1C1		1.78195						1
MSTRG.19741|LOC106563120	ssa11: 76419524-76482199	Stringtie|BLASTx	small nuclear ribonucleoprotein Sm D3(LOC106563120) [Salmo salar]	LOC106563120	CAMKK2				3.1554				1
MSTRG.10500|LOC106605965	ssa05: 79036664-79051421	Stringtie|BLASTx	CKLF-like MARVEL transmembrane domain-containing protein 7(LOC106605965) [Salmo salar]	LOC106605965	CMTM7				1.97021				1
MSTRG.18377|dkk3b	ssa10: 108557267-108573024	Stringtie|BLASTx	dickkopf WNT signaling pathway inhibitor 3b(dkk3b) [Salmo salar]	dkk3b	DKK3		1.58848						1
MSTRG.15364|LOC106611742	ssa09: 70035138-70189605	Stringtie|BLASTx	disks large homolog 3-like(LOC106611741) [Salmo salar]	LOC106611741	DLG3		1.26605						1
MSTRG.1188|LOC106612695	ssa01: 78512301-78702302	Stringtie|BLASTx	dystonin-like(LOC106612695) [Salmo salar]	LOC106612695	DST				2.30569				1
MSTRG.33255|LOC106579243	ssa19: 56593395-56605219	Stringtie|BLASTx	epidermal growth factor receptor kinase substrate 8-like protein 1(LOC106579243) [Salmo salar]	LOC106579243	EPS8L1				1.11682				1
MSTRG.33174|LOC106579328	ssa19: 53784544-53816029	Stringtie|BLASTx	ETS translocation variant 4-like(LOC106579328) [Salmo salar]	LOC106579328	ETV4		1.40986	1.32751					1
MSTRG.17633|LOC106560642	ssa10: 54710839-54827530	Stringtie|BLASTx	ephexin-1(LOC106560642) [Salmo salar]	LOC106560642	FARP2		4.97868						1
MSTRG.5946	ssa03: 52574413-52595924	Stringtie|BLASTx	ferritin, middle subunit-like(LOC123741664) [Salmo salar]	LOC123741664	FTH1				4.71619				1
MSTRG.36993|LOC106583724	ssa22: 54413757-54437486	Stringtie|BLASTx	uncharacterized LOC106583724(LOC106583724) [Salmo salar]	LOC106583724	--		1.49881						1
MSTRG.19865|LOC106563223	ssa11: 84974662-85219647	Stringtie|BLASTx	guanine nucleotide exchange factor VAV2(LOC106563223) [Salmo salar]	LOC106563223	VAV2							1.02473	1
MSTRG.3312|LOC106595311	ssa02: 26323393-26432891	Stringtie|BLASTx	IgGFc-binding protein(LOC106595311) [Salmo salar]	LOC106595311	FCGBP		7.2491						1
MSTRG.29967|LOC106575246	ssa17: 19569896-19576122	Stringtie|BLASTx	interferon-induced protein 44-like(LOC106575246) [Salmo salar]	LOC106575246	IFI44L		1.36757						1
MSTRG.3956|LOC106587793	ssa02: 56463226-56523209	Stringtie|BLASTx	keratin, type I cytoskeletal 13-like(LOC106587793) [Salmo salar]	LOC106587793	KRT13		1.0443	1.2962	1.22589				1
MSTRG.41155|LOC106588938	ssa27: 30723937-30742128	Stringtie|BLASTx	N-acetylneuraminate 9-O-acetyltransferase(LOC106588938) [Salmo salar]	LOC106588938	CASD1			-1.38111					1
MSTRG.30446|LOC106575038	ssa17: 44655041-44668973	Stringtie|BLASTx	prostaglandin D2 receptor 2(LOC106575038) [Salmo salar]	LOC106575038	PTGDR2			-10.2245					1
MSTRG.32120|LOC106577824	ssa18: 67987360-67993233	Stringtie|BLASTx	prostaglandin reductase 1(LOC106577824) [Salmo salar]	LOC106577824	PTGR1		1.21143	1.07315					1
MSTRG.13037|LOC106608861	ssa07: 24547115-24561538	Stringtie|BLASTx	prostaglandin reductase 1-like(LOC106608861) [Salmo salar]	LOC106608861	PTGR1		1.29868	1.32581	1.00294				1
MSTRG.1604|fa53b	ssa01: 116465759-116492960	Stringtie|BLASTx	FAM53B(fa53b) [Salmo salar]	fa53b	FAM53B		1.77017						1
MSTRG.25103|LOC106569528	ssa14: 38509070-38523685	Stringtie|BLASTx	RNA-binding protein MEX3B(LOC106569528) [Salmo salar]	LOC106569528	MEX3D		2.27884						1
MSTRG.41239|LOC106589034	ssa27: 37168627-37185360	Stringtie|BLASTx	serine/arginine-rich splicing factor 4-like(LOC106589034) [Salmo salar]	LOC106589034	SRSF4		2.07415						1
MSTRG.2212|tnca	ssa01: 148414317-148457145	Stringtie|BLASTx	tenascin Ca(tnca) [Salmo salar]	tnca	TNC		1.26231						1
MSTRG.21151	ssa12: 30992101-31005274	Stringtie|BLASTx	tensin-4-like(LOC106564955) [Salmo salar]	LOC106564955	TNS4			4.6542					1
MSTRG.37181|LOC106583914	ssa23: 2343070-2362408	Stringtie|BLASTx	tetraspanin-4(LOC106583914) [Salmo salar]	LOC106583914	TSPAN9				1.62962				1
MSTRG.21417|LOC106565286	ssa12: 45349620-45368151	Stringtie|BLASTx	transcription factor AP-2 gamma-like(LOC106565286) [Salmo salar]	LOC106565286	TFAP2C				1.15802				1
MSTRG.16318|rflnb	ssa09: 128741213-128780840	Stringtie|BLASTx	refilin B(rflnb) [Salmo salar]	rflnb	VPS53			2.43876					1
MSTRG.23660|LOC106567965	ssa13: 78358723-78483509	Stringtie|BLASTx	uncharacterized LOC106567965(LOC106567965) [Salmo salar]	LOC106567965	VMP1		1.69365	2.07519					1
MSTRG.39561|LOC106592031	ssa25: 53553945-53625477	Stringtie|BLASTx	X-ray repair cross-complementing protein 5-like(LOC106592031) [Salmo salar]	LOC106592031	XRCC5				-2.73447				1
MSTRG.24844|LOC106569178	ssa14: 27686708-27857292	Stringtie|BLASTx	zinc finger protein 521(LOC106569178) [Salmo salar]	LOC106569178	ZNF521		1.51716						1
MSTRG.35861	ssa21: 42436525-42444995	BLASTx	MOB-like protein phocein [Gallus gallus]		MOB4	26.746							2
MSTRG.14269	ssa08: 22011286-22042181	BLASTx	Interferon-induced very large GTPase 1 [Mus musculus]		GVINP1	5.14098							2
MSTRG.15835	ssa09: 96908627-97083384	BLASTx	Transcriptional regulator ATRX [Mus musculus]		ATRX	4.03148						-4.63617	2
MSTRG.11634	ssa06: 37283061-37303940	Stringtie|BLASTx	intercellular adhesion molecule 1(LOC106607214) [Salmo salar]	LOC106607214	VCAM1	3.65073							2
MSTRG.42239|LOC106590284	ssa29: 18532403-18596569	Stringtie|BLASTx	TGF-beta receptor type-1(LOC106590284) [Salmo salar]	LOC106590284	TGFBR1	2.43064							2
MSTRG.26357|dapk1	ssa15: 11214439-11387726	Stringtie|BLASTx	death-associated protein kinase 1(dapk1) [Salmo salar]	dapk1	DAPK1	2.23411					2.89529		2
MSTRG.30270|LOC106575809	ssa17: 32724794-32744679	Stringtie	cell surface A33 antigen(LOC106575809) [Salmo salar]	LOC106575809	GPA33	1.9788	2.26372						2
MSTRG.40975|LOC106588704	ssa27: 22145644-22208918	Stringtie	large proline-rich protein BAG6-like(LOC106588704) [Salmo salar]	LOC106588704	BAG6	1.8349							2
MSTRG.31478	ssa18: 18971245-18979760	BLASTx	Pleckstrin [Homo sapiens]		PLEKHH3	1.59202		-2.04592					2
MSTRG.9744	ssa05: 52252066-52274691	BLASTx	Platelet-activating factor acetylhydrolase IB subunit beta [Bos taurus]		PAFAH1B1	1.54176							2
MSTRG.34068	ssa20: 20812801-20899955	BLASTx	Anaphase-promoting complex subunit 5 [Rattus norvegicus]		ANAPC5	1.48281							2
MSTRG.23030	ssa13: 36824053-36830825	BLASTx	LETM1 domain-containing protein 1 [Mus musculus]		LETMD1	1.24602							2
MSTRG.12290	ssa06: 72154938-72203504	BLASTx	Pre-mRNA-processing factor 17 [Homo sapiens]		CDC40	1.1591							2
MSTRG.35023|LOC106581302	ssa20: 73062302-73308538	Stringtie	chloride channel protein 2 (LOC106581302) [Salmo salar]	LOC106581302	CLCN2	-1.00126	-1.3551	-1.29312					2
MSTRG.20790|LOC123725432	ssa12: 16920962-16950624	Stringtie	palmitoleoyl-protein carboxylesterase notum1a-like(LOC123725432) [Salmo salar]	LOC123725432	NOTUM	-1.0016							2
MSTRG.38976	ssa25: 14688356-14700371	BLASTx	Homeobox protein Dlx1a [Danio rerio]		DLX1	-1.00536							2
MSTRG.44590	NW_025548393.1: 345090-396046	BLASTx	Stonustoxin subunit beta [Synanceia horrida]		--	-1.0054							2
MSTRG.2335|LOC106569503	ssa01: 155375554-155523616	Stringtie|BLASTx	electrogenic sodium bicarbonate cotransporter 1(LOC106569503) [Salmo salar]	LOC106569503	SLC4A4	-1.01736	-1.16146	-1.18187		-1.08542		-2.05992	2
MSTRG.13259|LOC106609115	ssa07: 36340087-36384356	Stringtie	kinesin-like protein KIF21A(LOC106609115) [Salmo salar]	LOC106609115	KIF21A	-1.01848							2
MSTRG.27320|LOC106572218	ssa15: 70122688-70140242	Stringtie	5'-nucleotidase domain-containing protein 2(LOC106572218) [Salmo salar]	LOC106572218	NT5DC2	-1.01876					1.13621		2
MSTRG.40383	ssa26: 48672033-48692504	BLASTx	Large neutral amino acids transporter small subunit 1 [Homo sapiens]		SLC7A5	-1.02033							2
MSTRG.36923	ssa22: 49239125-49334467	BLASTx	Ral GTPase-activating protein subunit beta [Rattus norvegicus]		RALGAPB	-1.0214							2
MSTRG.27604|LOC106572387	ssa15: 86315905-86406833	Stringtie|BLASTx	rap1 GTPase-activating protein 1(LOC106572387) [Salmo salar]	LOC106572387	RAP1GAP	-1.02204							2
MSTRG.33647	ssa19: 77694690-77755236	BLASTx	Bone morphogenetic protein 7 [Mus musculus]		BMP7	-1.0238							2
MSTRG.10839	ssa06: 5257431-5272754	BLASTx	Mpv17-like protein [Bos taurus]		MPV17L	-1.02756							2
MSTRG.16539|efhd1	ssa09: 141984566-142001235	Stringtie	EF-hand domain family, member D1(efhd1) [Salmo salar]	efhd1	EFHD1	-1.02905							2
MSTRG.35752|LOC106582166	ssa21: 33123556-33179534	Stringtie	tumor necrosis factor receptor superfamily member EDAR-like(LOC106582166) [Salmo salar]	LOC106582166	EDAR	-1.03045							2
MSTRG.2671|LOC106597425	ssa02: 1742409-1744965	Stringtie	zinc-binding protein A33(LOC106597425) [Salmo salar]	LOC106597425	--	-1.03545		-1.25346				-1.18118	2
MSTRG.27602	ssa15: 86247256-86292928	BLASTx	Segment polarity protein dishevelled homolog DVL-3 [Xenopus tropicalis]		DVL3	-1.04053							2
MSTRG.22947|LOC106567284	ssa13: 34092939-34173885	Stringtie	synaptotagmin-2(LOC106567284) [Salmo salar]	LOC106567284	SYT2	-1.04189							2
MSTRG.97	ssa01: 4236714-4247265	BLASTx	Zinc transporter ZIP9 [Xenopus tropicalis]		SLC39A9	-1.04349							2
MSTRG.45957	NW_025549225.1: 443-1989	BLASTx	NLR family CARD domain-containing protein 3 [Homo sapiens]		NLRC3	-1.04881							2
MSTRG.35224	ssa20: 89675631-89677936	BLASTx	Zinc finger protein 862 [Homo sapiens]		ZNF862	-1.05079							2
MSTRG.16524	ssa09: 140206350-140234033	BLASTx	Sphingosine-1-phosphate phosphatase 2 [Homo sapiens]		SGPP2	-1.05469							2
MSTRG.29273	ssa16: 75384215-75422128	BLASTx	Sodium/potassium-transporting ATPase subunit alpha-1 [Oreochromis mossambicus]		ATP1A1	-1.06171							2
MSTRG.13235|LOC123743772	ssa07: 33883576-33888630	Stringtie	uncharacterized LOC123743772 [Salmo salar]	LOC123743772	--	-1.06725							2
MSTRG.45542	NW_025548891.1: 231163-343059	BLASTx	Stonustoxin subunit beta [Synanceia horrida]		--	-1.07068							2
MSTRG.1800	ssa01: 126880752-126915039	BLASTx	Transposable element Tcb1 transposase [Caenorhabditis briggsae]		--	-1.07226							2
MSTRG.44739	NW_025548356.1: 36707-312205	BLASTx	WD repeat-containing protein 19 [Homo sapiens]		WDR19	-1.07334							2
MSTRG.15364|LOC106611741	ssa09: 70035138-70189605	Stringtie|BLASTx	disks large homolog 3-like(LOC106611741) [Salmo salar]	LOC106611741	DLG3	-1.07512							2
MSTRG.22473|LOC106566385	ssa13: 9151498-9222187	Stringtie|BLASTx	S-adenosylhomocysteine hydrolase-like protein 1(LOC106566385) [Salmo salar]	LOC106566385	HSPA13	-1.07759		-1.17442					2
MSTRG.21624	ssa12: 57609066-57635826	BLASTx	Sodium- and chloride-dependent GABA transporter 3 [Mus musculus]		SLC6A11	-1.07914		-1.06112		-1.11428		-1.63749	2
MSTRG.7330|LOC106602157	ssa04: 7289309-7305217	Stringtie|BLASTx	sodium/potassium-transporting ATPase subunit alpha-1(LOC106602157) [Salmo salar]	LOC106602157	ATP1A1	-1.08405				-1.16891		-2.02593	2
MSTRG.35428|LOC106581819	ssa21: 14219160-14253378	Stringtie	activin receptor type-1C(LOC106581819) [Salmo salar]	LOC106581819	ACVR1C	-1.08658							2
MSTRG.19026|LOC106562282	ssa11: 21950887-21992806	Stringtie	uncharacterized LOC106562282(LOC106562282) [Salmo salar]	LOC106562282	--	-1.09117							2
MSTRG.20694	ssa12: 13447645-13472885	BLASTx	Meteorin [Mus musculus]		METRN	-1.09371							2
MSTRG.41049|LOC106588788	ssa27: 24866633-24885496	Stringtie	uncharacterized LOC106588788(LOC106588788) [Salmo salar]	LOC106588788	--	-1.09684							2
MSTRG.38564	ssa24: 29820477-29828920	BLASTx	Transposable element Tcb1 transposase [Caenorhabditis briggsae]		--	-1.09758							2
MSTRG.3281|fxyd11a	ssa02: 26084132-26101536	Stringtie|BLASTx	FXYD domain containing ion transport regulator 11a(fxyd11a) [Salmo salar]	fxyd11a	FXYD3	-1.103							2
MSTRG.27084|LOC106571769	ssa15: 55333763-55379816	Stringtie	major facilitator superfamily domain-containing protein 2B(LOC106571769) [Salmo salar]	LOC106571769	MFSD2B	-1.10813							2
MSTRG.38094	ssa24: 8348649-8374904	BLASTx	Very-long-chain 3-oxoacyl-CoA reductase-B [Xenopus laevis]		HSD17B12	-1.11064							2
MSTRG.40865|thbs3b	ssa27: 15184390-15215262	Stringtie	thrombospondin 3b(thbs3b) [Salmo salar]	thbs3b	THBS3	-1.11418							2
MSTRG.318|ush2a	ssa01: 18738912-19179231	Stringtie	Usher syndrome 2A (autosomal recessive, mild)(ush2a) [Salmo salar]	ush2a	USH2A	-1.1162				-1.21931			2
MSTRG.29142|LOC106574553	ssa16: 71240064-71246100	Stringtie	2-oxoglutarate receptor 1-like(LOC106574553) [Salmo salar]	LOC106574553	OXGR1	-1.11737							2
MSTRG.17024|LOC106613694	ssa10: 18878386-18885349	Stringtie	lipoprotein lipase(LOC106613694) [Salmo salar]	LOC106613694	LPL	-1.11955							2
MSTRG.5844|LOC106600630	ssa03: 47916657-47946917	Stringtie|BLASTx	solute carrier family 26 member 6-like(LOC106600630) [Salmo salar]	LOC106600630	SLC26A6	-1.12084							2
MSTRG.19932	ssa11: 88930604-88936928	BLASTx	Transmembrane protein 88 [Mus musculus]		TMEM88	-1.12259							2
MSTRG.22473	ssa13: 9151498-9222187	Stringtie|BLASTx	S-adenosylhomocysteine hydrolase-like protein 1(LOC106566385) [Salmo salar]	LOC106566385	HSPA13	-1.1251						-1.8248	2
MSTRG.34699	ssa20: 55454393-55482525	BLASTx	Sodium/calcium exchanger 1 [Mus musculus]		SLC8A1	-1.12674							2
MSTRG.43908	NW_025548094.1: 134068-181750	BLASTx	Uncharacterized protein ORF50 [Ictalurid herpesvirus 1 (strain Auburn)]		--	-1.12842							2
MSTRG.17069	ssa10: 20778345-20781582	BLASTn	lipopolysaccharide-induced tumor necrosis factor-alpha factor homolog (LOC106606540), transcript variant X2, mRNA [Salmo salar]	LOC106606540	LITAF	-1.13092							2
MSTRG.3440|LOC106580392	ssa02: 32924272-32934665	Stringtie	annexin A2-like(LOC106580392) [Salmo salar]	LOC106580392	ANXA2	-1.13327		-1.176					2
MSTRG.5716	ssa03: 39147880-39162697	BLASTx	GRAM domain-containing protein 2B [Rattus norvegicus]		GRAMD2B	-1.13952							2
MSTRG.25592|LOC106569924	ssa14: 65783011-65838713	Stringtie	protein MTSS 1-like (LOC106569924) [Salmo salar]	LOC106569924	MTSS1	-1.1441	-1.10393	-1.12416		-1.16612			2
MSTRG.44884|LOC123733123	NW_025548527.1: 14041-16123	Stringtie	zinc-binding protein A33-like [Salmo salar]	--	--	-1.14616	-1.16282						2
MSTRG.47307	NW_025550935.1: 8106-59042	BLASTx	E3 ubiquitin-protein ligase TRIM69 [Mus musculus]		TRIM69	-1.14774							2
MSTRG.16505	ssa09: 139330736-139809411	BLASTx	Chloride channel protein 2 [Cavia porcellus]		CLCN2	-1.14777							2
MSTRG.14254|LOC106610479	ssa08: 21712248-21726384	Stringtie|BLASTx	sodium/potassium-transporting ATPase subunit alpha-1(LOC106610479) [Salmo salar]	LOC106610479	ATP1A1	-1.1567				-1.31527			2
MSTRG.2280	ssa01: 151067143-151072299	BLASTx	GTPase IMAP family member 9 [Mus musculus]		GIMAP9	-1.16081							2
MSTRG.26372	ssa15: 13863690-13969703	BLASTx	Melanoma-associated antigen B4 [Mus musculus]		MAGEB4	-1.16101							2
MSTRG.8519	ssa04: 61833888-61839909	BLASTx	Frizzled-9 [Rattus norvegicus]		FZD9	-1.16294							2
MSTRG.33884|LOC106580271	ssa20: 10214585-10229090	Stringtie	interferon-inducible GTPase 5(LOC106580271) [Salmo salar]	LOC106580271	IRGC	-1.16712							2
MSTRG.26062	ssa14: 91802112-91803319	BLASTn	uncharacterized LOC120026906 [Salvelinus namaycush]		--	-1.16714							2
MSTRG.30175	ssa17: 27446406-27460342	BLASTx	SOSS complex subunit B2 [Danio rerio]		NABP1	-1.17818		-1.28114					2
MSTRG.31033	ssa17: 78458647-78469222	BLASTn	uncharacterized si:ch211-266a5.12 [Salmo salar]	--	--	-1.18158							2
MSTRG.38195|LOC106585050	ssa24: 14223504-14225233	Stringtie	claudin-4-like(LOC106585050) [Salmo salar]	LOC106585050	CLDN4	-1.19689							2
MSTRG.13708	ssa07: 59927580-59937169	BLASTn	uncharacterized LOC116360633 (LOC116360633), mRNA [Oncorhynchus kisutch]		--	-1.19775							2
MSTRG.269|LOC106564129	ssa01: 13766910-13768921	Stringtie	uncharacterized LOC106564129(LOC106564129) [Salmo salar]	LOC106564129	--	-1.19792							2
MSTRG.7227	ssa04: 3091554-3195475	BLASTx	Asialoglycoprotein receptor 2 [Mus musculus]		ASGR2	-1.1985							2
MSTRG.25805|LOC106570337	ssa14: 77525660-77544369	Stringtie|BLASTx	ubiquitin-conjugating enzyme E2Q-like protein 1(LOC106570337) [Salmo salar]	LOC106570337	UBE2QL1	-1.20655							2
MSTRG.3500	ssa02: 35196509-35208806	BLASTx	Ammonium transporter Rh type B [Xenopus tropicalis]		RHBG	-1.21064							2
MSTRG.13440|LOC106609368	ssa07: 45190810-45203363	Stringtie	pendrin-like(LOC106609368) [Salmo salar]	LOC106609368	SLC26A4	-1.21249							2
MSTRG.5689	ssa03: 37977422-37979505	Stringtie	C-C motif chemokine 20(LOC106600142) [Salmo salar]	LOC106600142	CCL20	-1.21299							2
MSTRG.11832|LOC106607477	ssa06: 44530578-44539118	Stringtie	pyruvate dehydrogenase (acetyl-transferring) kinase isozyme 2, mitochondrial(LOC106607477) [Salmo salar]	LOC106607477	PDK2	-1.21322							2
MSTRG.3184|LOC106578919	ssa02: 23113865-23119443	Stringtie	carcinoembryonic antigen-related cell adhesion molecule 1(LOC106578919) [Salmo salar]	LOC106578919	CEACAM1	-1.21465							2
MSTRG.23559	ssa13: 72819685-72895900	BLASTx	Beta-crystallin B2 [Oryctolagus cuniculus]		CRYBB2	-1.21968							2
LOC106584672|LOC106584672	ssa23: 41726988-41766149	Stringtie	DENN domain-containing protein 5B(LOC106584672) [Salmo salar]	LOC106584672	DENND5B	-1.23475		-1.07024					2
MSTRG.17142|LOC106613828	ssa10: 23980648-24000569	Stringtie|BLASTx	cysteine-rich motor neuron 1 protein-like(LOC106613828) [Salmo salar]	LOC106613828	SEC22B	-1.23846							2
MSTRG.37379	ssa23: 19581356-19590757	BLASTx	Regulator of G-protein signaling 4 [Oryctolagus cuniculus]		RGS4	-1.2401							2
MSTRG.29741|LOC106575150	ssa17: 7036539-7063120	Stringtie|BLASTx	interleukin-10 receptor subunit beta-like(LOC106575150) [Salmo salar]	LOC106575150	IL10RB	-1.25107			-1.19716				2
MSTRG.8349|LOC106603577	ssa04: 52789769-52804956	Stringtie	very-long-chain 3-oxoacyl-CoA reductase(LOC106603577) [Salmo salar]	LOC106603577	HSD17B12	-1.26424							2
MSTRG.918	ssa01: 55288302-55339745	BLASTx	mRNA decay activator protein ZFP36L2-A [Xenopus laevis]		ZFP36L2	-1.26491							2
MSTRG.2835|abcb5	ssa02: 10069679-10093815	BLASTx	ATP-dependent translocase ABCB1 [Cricetulus griseus]		ABCB1	-1.27839							2
MSTRG.12473	ssa06: 86334280-86354343	BLASTx	Thrombospondin-1 [Homo sapiens]		THBS1	-1.27924							2
MSTRG.42690|LOC123731699	NW_025547040.1: 4019-12368	Stringtie	uncharacterized LOC123731699 [Salmo salar]	LOC123731699	--	-1.28112							2
MSTRG.5829|LOC106600538	ssa03: 46531834-46621385	Stringtie	zinc finger protein 512B-like(LOC106600538) [Salmo salar]	LOC106600538	ZNF512B	-1.28134							2
MSTRG.33199|LOC106579293	ssa19: 54990265-54999696	Stringtie|BLASTx	chondroadherin-like(LOC106579293) [Salmo salar]	LOC106579293	CHAD	-1.28282							2
MSTRG.34220	ssa20: 29193121-29199125	BLASTn	neutrophil cytosolic factor 1 (ncf1), mRNA [Salmo salar]	ncf1	NCF1	-1.28301							2
MSTRG.41906	ssa28: 32349372-32359386	BLASTx	Transposable element Tcb1 transposase [Caenorhabditis briggsae]		--	-1.28434							2
MSTRG.6950	ssa03: 94820882-94834131	BLASTx	Mpv17-like protein [Bos taurus]		MPV17L	-1.30567						-1.38369	2
MSTRG.7331	ssa04: 7292144-7292835	BLASTn	purine nucleoside phosphorylase-like [Salvelinus namaycush]		PNP	-1.31266						-2.02731	2
MSTRG.42084	ssa29: 8956732-9010695	BLASTx	Extended synaptotagmin-2 [Mus musculus]		ESYT2	-1.32445							2
MSTRG.34963|LOC106581096	ssa20: 69324723-69338562	Stringtie	ATP-sensitive inward rectifier potassium channel 1-like(LOC106581096) [Salmo salar]	LOC106581096	KCNJ1	-1.3408				-1.0415			2
MSTRG.5433	ssa03: 24556301-24558183	BLASTn	uncharacterized LOC106584545 [Salmo salar]	LOC106584545	--	-1.34593							2
MSTRG.29901	ssa17: 17177720-17181886	BLASTx	Motile sperm domain-containing protein 2 [Mus musculus]		MOSPD2	-1.35							2
MSTRG.18275	ssa10: 102337303-102351988	BLASTx	Ammonium transporter Rh type C 1 [Takifugu rubripes]		RHCG	-1.3572	-1.44173						2
MSTRG.10319|ntd5	ssa05: 73461342-73478130	Stringtie	ntl-dependent gene 5(ntd5) [Salmo salar]	ntd5	NTD5	-1.36325							2
MSTRG.10141|fxyd11b	ssa05: 67959041-67978357	Stringtie|BLASTx	FXYD domain containing ion transport regulator 11b(fxyd11b) [Salmo salar]	fxyd11b	FXYD1	-1.40812		-1.19704					2
MSTRG.25470	ssa14: 61254121-61260225	BLASTn	uncharacterized LOC123726750 [Salmo salar]	LOC123726750	--	-1.42423				-1.29887			2
MSTRG.29463	ssa16: 83122375-83126434	No BLAST hit	--		--	-1.49831							2
MSTRG.45916	NW_025549203.1: 39978-46100	BLASTx	Stonustoxin subunit beta [Synanceia horrida]		--	-1.52448							2
MSTRG.9024|LOC106604170	ssa05: 7442874-7504034	Stringtie|BLASTx	uncharacterized LOC106604170(LOC106604170) [Salmo salar]	LOC106604170	TSC22D3	-1.5397							2
MSTRG.42128|lpin2	ssa29: 12076737-12159676	Stringtie|BLASTx	lipin 2(lpin2) [Salmo salar]	lpin2	LPIN2	-1.55628			-1.79907				2
MSTRG.23102|LOC106567102	ssa13: 40415672-40420496	Stringtie|BLASTx	UDP-glucuronosyltransferase 2A2-like(LOC106567102) [Salmo salar]	LOC106567102	UGT2A2	-1.56459							2
MSTRG.9427|stx3a	ssa05: 33106412-33128420	Stringtie|BLASTx	syntaxin 3A (stx3a) [Salmo salar]	stx3a	STX3	-1.57266							2
MSTRG.22864|LOC106566856	ssa13: 29833470-29838125	Stringtie	succinate dehydrogenase [ubiquinone] iron-sulfur subunit, mitochondrial(LOC106566856) [Salmo salar]	LOC106566856	SDHB	-1.57872							2
MSTRG.1354	ssa01: 89199944-89204368	BLASTx	Forkhead box protein J1-B [Danio rerio]		FOXJ1	-1.60062							2
MSTRG.42177|LOC123731560	ssa29: 14040922-14047541	Stringtie	uncharacterized LOC123731560(LOC123731560) [Salmo salar]	LOC123731560	--	-1.62768							2
MSTRG.46755	NW_025550064.1: 1174194-1198017	BLASTn	NLR family CARD domain-containing protein 3-like [Oncorhynchus gorbuscha]		NLRC3	-1.641							2
MSTRG.18722	ssa11: 1292216-1303138	BLASTx	Probable RNA-directed DNA polymerase from transposon BS [Drosophila melanogaster]		--	-1.71323							2
MSTRG.10961|LOC106606280	ssa06: 9808127-9887618	Stringtie	stonustoxin subunit beta-like(LOC106606280) [Salmo salar]	LOC106606280	--	-1.75235							2
MSTRG.24847	ssa14: 28003976-28018394	BLASTx	BTB/POZ domain-containing protein KCTD1 [Rattus norvegicus]		KCTD1	-1.76455							2
MSTRG.45339	NW_025548795.1: 96033-99230	BLASTn	uncharacterized LOC123744600 (LOC123744600), ncRNA [Salmo salar]	LOC123744600	--	-1.7674							2
MSTRG.43899	NW_025548095.1: 11091-18720	BLASTn	NLR family CARD domain-containing protein 3-like (LOC129868523), mRNA [Salvelinus fontinalis]		NLRC3	-1.80084							2
MSTRG.6380|LOC106601328	ssa03: 68432473-68454539	Stringtie	cysteine protease ATG4D-like(LOC106601328) [Salmo salar]	LOC106601328	ATG4D	-1.80963							2
MSTRG.3154	ssa02: 22211416-22238241	BLASTx	Pleckstrin homology domain-containing family G member 6 [Mus musculus]		PLEKHG6	-1.85486			-2.66911				2
MSTRG.10724	ssa05: 90538108-90543547	BLASTx	Transmembrane protein 42 [Pongo abelii]		TMEM42	-1.87026							2
MSTRG.16640	ssa09: 151469271-151470666	No BLAST hit	--		--	-1.90593							2
MSTRG.23731	ssa13: 81903511-81908895	BLASTn	protein FAM122A-like [Salmo trutta]		PABIR1	-1.92869							2
MSTRG.45911	NW_025549203.1: 28519-38043	BLASTn	zinc finger protein 436-like (LOC129838996), mRNA [Salvelinus fontinalis]		ZNF436	-1.95987							2
MSTRG.3327	ssa02: 27960742-28074883	BLASTx	Adhesion G protein-coupled receptor B1 [Mus musculus]		ADGRB1	-1.96307							2
MSTRG.6222	ssa03: 64100169-64129711	BLASTx	Hemoglobin subunit beta-1 [Oncorhynchus mykiss]		HBB	-1.98323							2
MSTRG.14965	ssa09: 39056007-39058328	BLASTn	microtubule-associated protein RP/EB family member 3-like [Salvelinus fontinalis]		MAPRE3	-2.00754							2
MSTRG.47078	NW_025550605.1: 34084-37885	BLASTn	macrophage mannose receptor 1-like (LOC106594186), transcript variant X2, mRNA [Salmo salar]	LOC106594186	MRC1	-2.04883							2
MSTRG.40147	ssa26: 33826360-33961457	BLASTx	E3 ubiquitin-protein ligase TRIM39 [Pan troglodytes]		TRIM39	-2.08338							2
MSTRG.32325|LOC106577876	ssa18: 75093383-75326623	Stringtie|BLASTx	collagen alpha-6(IV) chain(LOC106577876) [Salmo salar]	LOC106577876	COL4A2	-2.1654	-1.95744						2
MSTRG.20981|LOC106564559	ssa12: 23702462-23710338	Stringtie	bestrophin-2-like(LOC106564559) [Salmo salar]	LOC106564559	BEST2	-2.17083				-1.69867			2
MSTRG.45483	NW_025548873.1: 10279-23431	BLASTn	cytoskeleton-associated protein 2-like [Salvelinus fontinalis]		CKAP2	-2.18194							2
MSTRG.38648|LOC106585857	ssa24: 36185302-36196957	Stringtie|BLASTx	arrestin domain-containing protein 3-like(LOC106585857) [Salmo salar]	LOC106585857	ARRDC3	-2.18417						2.77658	2
MSTRG.30865|LOC106576445	ssa17: 66442418-66531031	Stringtie	apoptotic protease-activating factor 1-like(LOC106576445) [Salmo salar]	LOC106576445	APAF1	-2.18835							2
MSTRG.36909|LOC106583624	ssa22: 48687029-48702366	Stringtie|BLASTx	EKC/KEOPS complex subunit TP53RK(LOC106583625) [Salmo salar]	LOC106583625	TP53RK	-2.22639							2
MSTRG.37222|LOC106583957	ssa23: 4186695-4238923	Stringtie	transmembrane 4 L6 family member 1(LOC106583957) [Salmo salar]	LOC106583957	TM4SF1	-2.32805							2
MSTRG.29105	ssa16: 68090393-68095869	Stringtie|BLASTx	glycerol-3-phosphate dehydrogenase 1-like protein(LOC106574437) [Salmo salar]	LOC106574437	GPD1L	-2.4493		-2.60423					2
MSTRG.43960	NW_025548103.1: 402325-403734	BLASTx	Probable RNA-directed DNA polymerase from transposon BS [Drosophila melanogaster]		--	-2.5755							2
MSTRG.43785	NW_025548030.1: 366766-368987	BLASTn	TOG array regulator of axonemal microtubules protein 2-like (LOC129819072), transcript variant X3, mRNA [Salvelinus fontinalis]		TOGARAM2	-2.69981							2
MSTRG.32362	ssa18: 77750363-77764341	Stringtie|BLASTx	N-acetylglucosamine kinase(nagk) [Salmo salar]	nagk	NAGK	-2.70651							2
MSTRG.45993	NW_025549304.1: 2276-54718	No BLAST hit	--		--	-3.12032							2
MSTRG.23056	ssa13: 38020008-38057659	BLASTn	hematopoietic progenitor cell antigen CD34-like [Salmo trutta]		CD34	-3.5428							2
MSTRG.17544	ssa10: 48303394-48543788	BLASTx	Hemicentin-2 [Mus musculus]		HMCN2	-3.57496							2
MSTRG.5539	ssa03: 30982449-30996181	BLASTx	Interferon regulatory factor 4 [Mus musculus]		IRF4	-3.57902							2
MSTRG.7180	ssa03: 104252598-104253923	BLASTn	uncharacterized LOC123734136 (LOC123734136), ncRNA [Salmo salar]	LOC123734136	--	-3.74398		4.31267					2
MSTRG.30257	ssa17: 31717787-32113344	BLASTx	Dystrophin [Sus scrofa]		DMD	-4.16687		-3.0486					2
MSTRG.31618	ssa18: 28115864-28355428	BLASTx	Zinc finger MIZ domain-containing protein 1 [Mus musculus]		ZMIZ1	-4.51956							2
MSTRG.19571	ssa11: 65707460-65809643	BLASTx	F-BAR domain only protein 2 [Danio rerio]		FCHO2	-4.81665			-3.82601				2
MSTRG.25627	ssa14: 67235893-67243889	Stringtie|BLASTx	perforin-1-like(LOC123726764) [Salmo salar]	LOC123726764	PRF1	-5.44638							2
MSTRG.40897	ssa27: 17586590-17664067	BLASTx	Collagen alpha-1(XXII) chain [Homo sapiens]		COL22A1	-5.68424							2
MSTRG.11477	ssa06: 33093325-33097413	BLASTx	GTPase IMAP family member 2 [Homo sapiens]		GIMAP2	-5.84571							2
MSTRG.33240	ssa19: 55877316-55921337	BLASTx	MAGUK p55 subfamily member 2 [Rattus norvegicus]		MPP2	-6.15209							2
MSTRG.31689	ssa18: 34222544-34247099	BLASTx	PHD finger protein 3 [Homo sapiens]		PHF3	-6.15752			-9.34263				2
MSTRG.24657	ssa14: 16695309-16712087	BLASTx	Protein phosphatase 1 regulatory subunit 7 [Danio rerio]		PPP1R7	-7.89636					-25.2982		2
MSTRG.33144|LOC106579009	ssa19: 51928823-52025989	Stringtie|BLASTx	uncharacterized LOC106579009(LOC106579009) [Salmo salar]	LOC106579009	--					-2.48134			2
MSTRG.7344	ssa04: 7938370-7945239	BLASTn	uncharacterized LOC123744616 (LOC123744616), ncRNA [Salmo salar]	LOC123744616	--					-1.3094			2
MSTRG.29310	ssa16: 76387275-76412564	Stringtie|BLASTx	insulin-like growth factor-binding protein 5(LOC100194500) [Salmo salar]	LOC100194500	IGFBP5		-2.06123		-1.98797	-2.62977			2
MSTRG.25214|LOC106569614	ssa14: 44120090-44232459	Stringtie|BLASTx	hippocampus abundant transcript 1 protein(LOC106569615) [Salmo salar]	LOC106569615	MFSD14A					-2.26425			2
MSTRG.37313|LOC106584061	ssa23: 11592736-11619397	Stringtie	terminal uridylyltransferase 4-like(LOC106584061) [Salmo salar]	LOC106584061	TUT4					-1.60117			2
MSTRG.34494	ssa20: 45290202-45323232	BLASTx	Cullin-3 [Rattus norvegicus]		CUL3					-1.77672	1.61256		2
MSTRG.17979|lcat	ssa10: 83463184-83475931	Stringtie	lecithin-cholesterol acyltransferase(lcat) [Salmo salar]	lcat	LCAT					-1.38648			2
MSTRG.3199|ceacam1	ssa02: 23427705-23443847	BLASTx	Carcinoembryonic antigen-related cell adhesion molecule 5 [Homo sapiens]		CEACAM5					-1.1304			2
MSTRG.2510	ssa01: 163918805-163934217	BLASTx	SH2 domain-containing protein 4A [Xenopus tropicalis]		SH2D4A					-10.8067			2
MSTRG.28475	ssa16: 30945762-30989442	BLASTx	Partitioning defective 6 homolog alpha [Homo sapiens]		PARD6A					-2.94518			2
MSTRG.39300|nr1i2	ssa25: 34277934-34363796	Stringtie	nuclear receptor subfamily 1, group I, member 2(nr1i2) [Salmo salar]	nr1i2	NR1I2					-1.9801			2
MSTRG.3199	ssa02: 23427705-23443847	BLASTx	Carcinoembryonic antigen-related cell adhesion molecule 5 [Homo sapiens]		CEACAM5		-1.70831			-1.10888			2
MSTRG.10807|LOC106606241	ssa06: 4241087-4262244	Stringtie	rogdi atypical leucine zipper(LOC106606241) [Salmo salar]	LOC106606241	ROGDI					-1.25513			2
MSTRG.27427	ssa15: 76324776-76336980	BLASTx	Phosphatidylinositol 4,5-bisphosphate 3-kinase catalytic subunit gamma isoform [Sus scrofa]		PIK3CG					-1.17629	-1.21333		2
MSTRG.2401|pip5kl1	ssa01: 158530141-158538451	Stringtie	phosphatidylinositol-4-phosphate 5-kinase-like 1(pip5kl1) [Salmo salar]	pip5kl1	PIP5KL1					-1.19576			2
MSTRG.29112|LOC106574429	ssa16: 68569626-68584602	Stringtie	secretin receptor-like(LOC106574429) [Salmo salar]	LOC106574429	SCTR			-1.48291					2
MSTRG.5183|LOC123741607	ssa03: 12818393-12855961	Stringtie|BLASTx	uncharacterized LOC123741607(LOC123741607) [Salmo salar]	LOC123741607	CCDC39					-1.24949			2
MSTRG.41910|LOC106589894	ssa28: 32429324-32442112	Stringtie	G-protein coupled receptor family C group 5 member C [Salmo salar]	gprc5c	GPRC5C					-1.05874			2
MSTRG.24185|prlra	ssa13: 104502760-104537967	Stringtie	prolactin receptor a(prlra) [Salmo salar]	prlra	PRLR			-1.02259		-1.06086			2
MSTRG.3559	ssa02: 37151196-37161093	BLASTx	Islet cell autoantigen 1 [Mus musculus]		ICA1					3.522			2
MSTRG.16020|LOC106612386	ssa09: 115077345-115082420	Stringtie	probable zinc transporter protein DDB_G0282067(LOC106612386) [Salmo salar]	LOC106612386	--					-1.48242			2
MSTRG.23096	ssa13: 40317759-40328158	BLASTx	Calcium/calmodulin-dependent protein kinase type 1G [Mus musculus]		CAMK1G					-9.07833			2
MSTRG.43501|LOC106599002	NW_025547820.1: 101194-110191	Stringtie|BLASTx	ethylmalonyl-CoA decarboxylase-like(LOC106599002) [Salmo salar]	LOC106599002	ECHDC1		-1.24594			-1.06027			2
MSTRG.399	ssa01: 24280093-24284259	BLASTx	Transcriptional regulator Myc-B [Danio rerio]		MYC					-3.73987			2
MSTRG.34597	ssa20: 51444679-51448747	BLASTx	Flavin reductase (NADPH) [Homo sapiens]		BLVRB					-2.47196			2
MSTRG.46826	NW_025550171.1: 10812-27570	BLASTx	G patch domain-containing protein 1 [Bos taurus]		GPATCH1					-1.77786			2
MSTRG.38539|LOC106585701	ssa24: 29101843-29170800	Stringtie|BLASTx	transient receptor potential cation channel subfamily M member 6-like(LOC106585702) [Salmo salar]	LOC106585702	CARNMT1					-3.00369			2
MSTRG.3377|LOC106579712	ssa02: 30817517-30829496	Stringtie	zinc-binding protein A33-like(LOC106579712) [Salmo salar]	LOC106579712	--					-1.26782			2
MSTRG.27266	ssa15: 67853449-67882309	BLASTx	Aminomethyltransferase, mitochondrial [Gallus gallus]		AMT					-1.00441			2
MSTRG.37604|atp8b3	ssa23: 32596407-32635630	BLASTx	Phospholipid-transporting ATPase IK [Mus musculus]		ATP8B3					-1.87507			2
MSTRG.13394	ssa07: 43337554-43347229	BLASTx	Splicing factor 45 [Homo sapiens]		RBM17					1.00132			2
MSTRG.44740	NW_025548356.1: 87938-101311	BLASTn	mucin-5AC-like (LOC124027478), partial mRNA [Oncorhynchus gorbuscha]		MUC5AC			-2.269					2
MSTRG.14564	ssa09: 13560067-13573136	BLASTx	RNA polymerase II-associated protein 1 [Bos taurus]		RPAP1					-3.59409			2
MSTRG.23600|LOC106568021	ssa13: 74941608-74995693	Stringtie|BLASTx	angiomotin(LOC106568021) [Salmo salar]	LOC106568021	AMOT					1.57754			2
MSTRG.18736	ssa10: 123182198-123184271	BLASTx	Mucin-5B [Homo sapiens]		MUC5B				2.38947				2
MSTRG.12698|LOC106608496	ssa07: 6044142-6189882	Stringtie	mucin-2-like(LOC106608496) [Salmo salar]	LOC106608496	MUC2		-1.30839						2
MSTRG.20275|LOC106593568	ssa11: 101767717-101779121	Stringtie|BLASTx	GTPase IMAP family member 4-like(LOC106593568) [Salmo salar]	LOC106593568	GIMAP8						-1.5878		2
MSTRG.4429|LOC106592611	ssa02: 73597058-73737222	Stringtie|BLASTx	GTPase IMAP family member 7(LOC106592730) [Salmo salar]	LOC106592730	GIMAP9			-1.15633					2
MSTRG.46674	NW_025549919.1: 42352-46516	BLASTn	cilia- and flagella-associated protein 251-like (LOC129839869), transcript variant X1, misc_RNA [Salvelinus fontinalis]		CFAP251		-2.14464						2
MSTRG.41163	ssa27: 31197918-31198511	BLASTn	cytoskeleton-associated protein 2-like [Salvelinus fontinalis]		CKAP2			-4.73769					2
MSTRG.19399	ssa11: 48129222-48136311	BLASTn	large neutral amino acids transporter small subunit 1-like [Salvelinus namaycush]		SLC7A5		-1.46572						2
MSTRG.10876	ssa06: 3019213-3128049	BLASTn	NACHT, LRR and PYD domains-containing protein 12-like [Salvelinus fontinalis]		NLRP12				-9.27299				2
MSTRG.73	ssa01: 3062665-3063775	BLASTn	NLR family CARD domain-containing protein 3-like [Oncorhynchus kisutch]		NLRC3							-5.43022	2
MSTRG.47272	NW_025550925.1: 307913-352055	BLASTn	phospholipid phosphatase-related protein type 5-like [Salvelinus fontinalis]		PLPPR5			-9.33105					2
MSTRG.31790	ssa18: 46527762-46589202	BLASTn	phospholipid phosphatase-related protein type 5-like (LOC129823922), mRNA [Salvelinus fontinalis]		PLPPR5			-10.1542					2
MSTRG.43171	NW_025547602.1: 124-2433	BLASTn	uncharacterized LOC115189415 [Salmo trutta]		--				-4.60186				2
MSTRG.32350	ssa18: 77038143-77048708	BLASTn	uncharacterized LOC115194660 (LOC115194660), transcript variant X2, ncRNA [Salmo trutta]		--						-1.22301		2
MSTRG.42755	NW_025547141.1: 263-12577	BLASTn	uncharacterized LOC123732598 [Salmo salar]	LOC123732598	--							-4.65127	2
MSTRG.13681	ssa07: 57747031-57749846	BLASTn	uncharacterized LOC127906588 (LOC127906588), ncRNA [Oncorhynchus keta]		--			-4.23103					2
MSTRG.17561	ssa10: 50231793-50256431	BLASTn	uncharacterized LOC127907843 [Oncorhynchus keta]		--			-6.95362					2
MSTRG.23	ssa01: 385898-386819	BLASTn	uncharacterized LOC127917601 [Oncorhynchus keta]		--							-5.86049	2
MSTRG.37408	ssa23: 21047190-21055230	BLASTn	uncharacterized LOC129829915 [Salvelinus fontinalis]		--		-3.58267						2
MSTRG.8981	ssa05: 869975-871973	BLASTn	uncharacterized LOC129851030 (LOC129851030), ncRNA [Salvelinus fontinalis]		--				1.16893				2
MSTRG.38075	ssa24: 7476199-7525784	BLASTx	A disintegrin and metalloproteinase with thrombospondin motifs 7 [Mus musculus]		ADAMTS7						-4.38979		2
MSTRG.39035	ssa25: 18079360-18108500	BLASTx	ADP-ribosylhydrolase ARH1 [Protein ADP-ribosylarginine] hydrolase		ADPRH		-3.51949						2
MSTRG.9446	ssa05: 34691823-34711377	BLASTx	Alpha-1,3-mannosyl-glycoprotein 4-beta-N-acetylglucosaminyltransferase B [Danio rerio]		MGAT4B			-1.26455					2
MSTRG.28223	ssa16: 12620743-12641757	BLASTx	Alpha-parvin [Homo sapiens]		PARVA			6.08008					2
MSTRG.11696	ssa06: 39102118-39106488	BLASTx	AN1-type zinc finger protein 2A [Pongo abelii]		ZFAND2A							-3.11509	2
MSTRG.19718	ssa11: 75266424-75272994	BLASTx	AT-rich interactive domain-containing protein 5A [Bos taurus]		ARID5A				-1.75451				2
MSTRG.34415	ssa20: 39244258-39257879	BLASTx	ATP synthase subunit alpha, mitochondrial [Bos taurus]		ATP5F1A				-2.31684				2
MSTRG.14836	ssa09: 26747945-26765523	BLASTx	Bone morphogenetic protein 4 [Oryctolagus cuniculus]		BMP4			-1.25387					2
MSTRG.12684	ssa07: 5254255-5285948	BLASTx	Breast cancer metastasis-suppressor 1-like protein [Mus musculus]		BRMS1L		-8.84909						2
MSTRG.36244	ssa22: 12211040-12231762	BLASTx	Bromodomain and PHD finger-containing protein 3 [Mus musculus]		BRPF3			-1.77585					2
MSTRG.11305	ssa06: 27390461-27397273	BLASTx	Butyrophilin subfamily 3 member A3 [Homo sapiens]		BTN3A3			-1.00733					2
MSTRG.9007	ssa05: 5106352-5356603	BLASTx	Catenin alpha-1 [Homo sapiens]		CTNNA1							-2.89438	2
MSTRG.9600	ssa05: 40166326-40191926	BLASTx	CCR4-NOT transcription complex subunit 6 [Homo sapiens]		CNOT6						4.73977		2
MSTRG.20200	ssa11: 98178931-98250623	BLASTx	Claudin-4 [Bos taurus]		CLDN4							8.36278	2
MSTRG.23672	ssa13: 79512740-79606884	BLASTx	Coxsackievirus and adenovirus receptor homolog [Danio rerio]		CAR		-25.8824						2
MSTRG.24217	ssa13: 106771037-106797348	BLASTx	Cyclin-I [Mus musculus]		CCNI				-2.04694				2
MSTRG.46672	NW_025549906.1: 30213-33593	BLASTx	Derlin-1 [Bos taurus]		DERL1				-3.93502				2
MSTRG.11360	ssa06: 29086437-29091884	BLASTx	DNA polymerase beta [African swine fever virus Lisbon 60/lis60]		POLB			-1.19984					2
MSTRG.31309	ssa18: 8357332-8373651	BLASTx	DNA-directed RNA polymerase I subunit RPA2 [Danio rerio]		POLR1B			-2.05404					2
MSTRG.46695	NW_025549944.1: 442-2084	BLASTx	Dynein heavy chain [Oncorhynchus mykiss]		DNHD1			-3.49184	-3.6218				2
MSTRG.44276	NW_025548249.1: 346259-347073	BLASTx	E3 ubiquitin-protein ligase ZNF598 [Danio rerio]		ZNF598				-2.64912				2
MSTRG.43474	NW_025547792.1: 5-12796	BLASTx	Endothelin-1 receptor [Ovis aries]		EDNRA			-1.41048					2
MSTRG.31897	ssa18: 56303591-56319472	BLASTx	Evolutionarily conserved signaling intermediate in Toll pathway, mitochondrial [Danio rerio]		ECSIT							10.3533	2
MSTRG.1183	ssa01: 78109804-78131065	BLASTx	Exportin-5 [Homo sapiens]		XPO5			-1.15589					2
MSTRG.9168	ssa05: 15077717-15086812	BLASTx	Forkhead box protein I1-ema [Xenopus laevis]		FOXI1							-1.44764	2
MSTRG.42911	NW_025547350.1: 46023-48895	BLASTx	Gastrula zinc finger protein XlCGF28.1 [Xenopus laevis]		--		-2.61414						2
MSTRG.17379	ssa10: 36646401-36649427	BLASTx	Growth arrest and DNA damage-inducible protein GADD45 alpha [Cricetulus griseus]		GADD45A		1.0452						2
MSTRG.35976	ssa21: 52326876-52371143	BLASTx	Guanylate-binding protein 1 [Chlorocebus aethiops]		GBP1				-2.08258				2
MSTRG.24311	ssa13: 113795992-113827048	BLASTx	Haloacid dehalogenase-like hydrolase domain-containing protein 2 [Danio rerio]		HDHD2							2.08526	2
MSTRG.10242	ssa05: 70445161-70707300	BLASTx	Hemicentin-2 [Mus musculus]		HMCN2		-1.1114						2
MSTRG.5335	ssa03: 17781643-17801247	BLASTx	Histone deacetylase complex subunit SAP130 [Gallus gallus]		SAP130			-3.77893					2
MSTRG.44254	NW_025548236.1: 21320-88244	BLASTx	Inhibitor of nuclear factor kappa-B kinase subunit epsilon [Homo sapiens]		IKBKE		1.50091						2
MSTRG.27878	ssa15: 98502862-98542010	BLASTx	Keratin, type II cytoskeletal 8 [Danio rerio]		KRT8				1.49374				2
MSTRG.3487	ssa02: 34898647-34910854	BLASTx	Leiomodin-3 [Danio rerio]		LMOD3			-8.88782					2
MSTRG.15285	ssa09: 65770928-65775541	BLASTx	Leptin receptor overlapping transcript-like 1 [Homo sapiens]		LEPROTL1				-8.54174				2
MSTRG.31684	ssa18: 32794817-33106466	BLASTx	Lysosomal cobalamin transport escort protein LMBD1 [Xenopus tropicalis]		LMBRD1			9.0581					2
MSTRG.45619	NW_025548927.1: 87038-103115	BLASTx	Lysostaphin [Staphylococcus simulans]		--			-5.51227	-5.7139				2
MSTRG.46696	NW_025549944.1: 3008-5570	BLASTx	Lysostaphin [Staphylococcus simulans]		--			-5.36504					2
MSTRG.33323	ssa19: 58726191-58734962	BLASTx	Major facilitator superfamily domain-containing protein 1 [Danio rerio]		MFSD1				-1.65163				2
MSTRG.34170	ssa20: 27156766-27243586	BLASTx	MLX-interacting protein [Homo sapiens]		MLXIP		-1.02006						2
MSTRG.12944	ssa07: 21415479-21433841	BLASTx	Nectin-4 [Xenopus tropicalis]		NECTIN4			-1.43377					2
MSTRG.42721	NW_025547122.1: 157763-265359	BLASTx	Neoverrucotoxin subunit beta [Synanceia verrucosa]		--							-2.38855	2
MSTRG.42770	NW_025547151.1: 77053-91977	BLASTx	Neoverrucotoxin subunit beta [Synanceia verrucosa]		--							-1.80204	2
MSTRG.42720	NW_025547122.1: 138935-265380	BLASTx	NLR family CARD domain-containing protein 3 [Homo sapiens]		NLRC3							-2.1318	2
MSTRG.45454	NW_025548868.1: 32785-35439	BLASTx	NLR family member X1 [Rattus norvegicus]		NLRX1			-1.7389					2
MSTRG.7209	ssa03: 104981654-104986904	BLASTx	Opioid growth factor receptor [Mus musculus]		OGFR				-8.62548				2
MSTRG.6516	ssa03: 72884954-72890497	BLASTx	PAT complex subunit CCDC47 [Canis lupus familiaris]		CCDC47			-1.90338					2
MSTRG.5337	ssa03: 17824870-17829391	BLASTx	PiggyBac transposable element-derived protein 4 [Homo sapiens]		PGBD4				2.84832				2
MSTRG.14795	ssa09: 25211622-25230842	BLASTx	Probable RNA-directed DNA polymerase from transposon BS [Drosophila melanogaster]		--		-1.39853						2
MSTRG.4323	ssa02: 70682902-70693980	BLASTx	Probable RNA-directed DNA polymerase from transposon BS [Drosophila melanogaster]		--							-25.0106	2
MSTRG.31127	ssa17: 84498924-84575607	BLASTx	Proline-rich protein 5 [Xenopus laevis]		PRR5		-2.54285					-2.62994	2
MSTRG.12190	ssa06: 67079106-67154621	BLASTx	Protein dispatched homolog 1 [Danio rerio]		DISP1							-11.0835	2
MSTRG.33646	ssa19: 77669830-77701905	BLASTx	Protein disulfide-isomerase C17H9.14c [Schizosaccharomyces pombe 972h-]		--		-2.67584						2
MSTRG.35683	ssa21: 28801881-28857311	BLASTx	Protein dopey-2 [Xenopus laevis]		DOP1B		-7.37318						2
MSTRG.25837	ssa14: 79023244-79028574	BLASTx	Protein eva-1 homolog A [Danio rerio]		EVA1A				-4.57783				2
MSTRG.19916	ssa11: 87719701-87744182	BLASTx	Protein phosphatase PTC7 homolog [Danio rerio]		PPTC7			-8.63147					2
MSTRG.7295	ssa04: 6169874-6175028	BLASTx	Protein sey1 [Penicillium rubens Wisconsin 54-1255]		--			-4.12085					2
MSTRG.29671	ssa17: 1432522-1462557	BLASTx	Putative adenosylhomocysteinase 3 [Mus musculus]		AHCYL2		-1.55549	-1.58677					2
MSTRG.11512|LOC106607078	ssa06: 33960583-33977427	BLASTx	Ral guanine nucleotide dissociation stimulator-like 1 [Homo sapiens]		RGL1			-1.95214					2
MSTRG.12813	ssa07: 13530032-13583233	BLASTx	RAS guanyl-releasing protein 2 [Homo sapiens]		RASGRP2			-1.00029					2
MSTRG.37379|LOC106584143	ssa23: 19581356-19590757	BLASTx	Regulator of G-protein signaling 4 [Oryctolagus cuniculus]		RGS4							-2.40387	2
MSTRG.16401	ssa09: 132765724-132813507	BLASTx	Rho GTPase-activating protein 32 [Xenopus laevis]		ARHGAP32			-1.03048					2
MSTRG.44591	NW_025548393.1: 345099-401343	BLASTx	Ribonuclease inhibitor [Rattus norvegicus]		RNH1			-1.49933					2
MSTRG.36272	ssa22: 13208091-13213015	BLASTx	Serine/threonine-protein kinase Sgk2 [Homo sapiens]		SGK2		-1.09091	-1.12992					2
MSTRG.24701	ssa14: 20383945-20425475	BLASTx	Solute carrier organic anion transporter family member 5A1 [Homo sapiens]		SLCO5A1		-10.5422						2
MSTRG.11763	ssa06: 41677182-41691312	BLASTx	StAR-related lipid transfer protein 3 [Salvelinus fontinalis]		STARD3		-1.21753	-1.41231					2
MSTRG.9480	ssa05: 35590712-35599073	BLASTx	START domain-containing protein 10 [Homo sapiens]		STARD10			-2.87129					2
MSTRG.44363	NW_025548276.1: 20279-26278	BLASTx	Stonustoxin subunit beta [Synanceia horrida]		--							-1.1985	2
MSTRG.46750	NW_025550064.1: 891744-895381	BLASTx	Stonustoxin subunit beta [Synanceia horrida]		--							-1.13245	2
MSTRG.34358	ssa20: 35806108-35835688	BLASTx	Tetraspanin-33 [Xenopus laevis]		TSPAN33		-6.24333						2
MSTRG.20739	ssa12: 15112659-15291561	BLASTx	Transcription factor RFX3 [Danio rerio]		RFX3			-1.4067					2
MSTRG.10020	ssa05: 62084781-62094787	BLASTx	Transcription intermediary factor 1-beta [Mus musculus]		TRIM28							1.69221	2
MSTRG.42658	NW_025546990.1: 48205-51341	BLASTx	Translation initiation factor IF-2 [Desulfitobacterium hafniense Y51]		MTIF2							-7.01623	2
MSTRG.17408	ssa10: 39134672-39144602	BLASTx	Transposable element Tc1 transposase [Caenorhabditis elegans]		--		-1.40962						2
MSTRG.18276	ssa10: 102363687-102371451	BLASTx	Transposable element Tcb1 transposase [Caenorhabditis briggsae]		--		-1.61091	-1.04956					2
MSTRG.44279	NW_025548249.1: 335351-339366	BLASTx	Transposable element Tcb1 transposase [Caenorhabditis briggsae]		--						6.28871	-7.38144	2
MSTRG.37896	ssa23: 47761291-47766901	BLASTx	Transposable element Tcb1 transposase [Caenorhabditis briggsae]		--			5.26821					2
MSTRG.845	ssa01: 50730803-50761521	BLASTx	Transposable element Tcb2 transposase [Caenorhabditis briggsae]		--				-1.59434				2
MSTRG.10557	ssa05: 81001664-81033561	BLASTx	Transposon Tf2-3 polyprotein [Schizosaccharomyces pombe 972h-]		--		-1.08579						2
MSTRG.12732	ssa07: 7987479-8159424	BLASTx	Tumor necrosis factor receptor superfamily member 19L [Macaca fascicularis]		RELT				5.93545				2
MSTRG.27693	ssa15: 89603313-89636926	BLASTx	Tyrosine-protein phosphatase non-receptor type 12 [Mus musculus]		PTPN12			-2.53847					2
MSTRG.35735	ssa21: 31180816-31186233	BLASTx	Uncharacterized protein C3orf38 homolog [Rattus norvegicus]		C3orf38				-24.5206				2
MSTRG.20342	ssa11: 107645381-107670710	BLASTx	Uncharacterized protein MTH_692 [Methanothermobacter thermautotrophicus str. Delta H]		--			-1.0605					2
MSTRG.41382	ssa28: 1796896-1844229	BLASTx	Vesicle-fusing ATPase [Cricetulus griseus]		NSF		-7.55314						2
MSTRG.8830	ssa04: 84198373-84270088	BLASTx	von Willebrand factor A domain-containing protein 7 [Bos taurus]		VWA7			-1.28518					2
MSTRG.24693	ssa14: 19602811-19621701	BLASTx	WD repeat-containing protein 37 [Xenopus laevis]		WDR37		-1.18776						2
MSTRG.20647	ssa12: 11635340-11656534	BLASTx	Zinc finger protein 41 [Homo sapiens]		ZNF41			-8.44979					2
MSTRG.4849	ssa02: 90086381-90105016	BLASTx	Zinc finger protein 544 [Homo sapiens]		ZNF544		-3.02991						2
MSTRG.9674	ssa05: 47662533-47755479	BLASTx	Zinc finger protein Helios [Mus musculus]		IKZF2			-2.2726					2
MSTRG.2876|LOC106584756	ssa02: 12312110-12581712	BLASTx	Zymogen granule membrane protein 16 [Mus musculus]		ZG16		-1.94635						2
MSTRG.2876	ssa02: 12312110-12581712	BLASTx	Zymogen granule membrane protein 16 [Mus musculus]		ZG16		-1.37356						2
MSTRG.2877	ssa02: 12382671-12581075	BLASTx	Zymogen granule membrane protein 16 [Mus musculus]		ZG16		-2.81512						2
MSTRG.4233	ssa02: 68365333-68376671	No BLAST hit	--		--		-1.17319						2
MSTRG.25738|LOC106570303	ssa14: 74658918-74668042	Stringtie	3-oxoacyl-[acyl-carrier-protein] synthase, mitochondrial(LOC106570303) [Salmo salar]	LOC106570303	OXSM			-1.67882					2
MSTRG.22452|LOC106566301	ssa13: 8028164-8408527	Stringtie	arginine-glutamic acid dipeptide repeats protein-like(LOC106566301) [Salmo salar]	LOC106566301	RERE				2.14216				2
MSTRG.5970|camsap3	ssa03: 53494987-53548189	Stringtie	calmodulin regulated spectrin-associated protein family, member 3(camsap3) [Salmo salar]	camsap3	CAMSAP3			-1.02635					2
MSTRG.19423|LOC106591457	ssa11: 51504111-51507129	Stringtie	chymotrypsin A-like(LOC106591457) [Salmo salar]	LOC106591457	--			-1.15118					2
MSTRG.35222|cldn8.1	ssa20: 89860602-89863164	Stringtie	claudin 8.1(cldn8.1) [Salmo salar]	cldn8.1	CLDN8							-1.20394	2
MSTRG.6287|csdc2	ssa03: 66229393-66246852	Stringtie	cold shock domain containing C2, RNA binding(csdc2) [Salmo salar]	csdc2	CSDC2				-1.13852				2
MSTRG.22887|LOC106566878	ssa13: 30392298-30458329	Stringtie	cyclin-dependent kinase 11B(LOC106566878) [Salmo salar]	LOC106566878	CDK11B				1.21839				2
MSTRG.4417|LOC106592158	ssa02: 73240164-73265130	Stringtie	DENN domain-containing protein 1B-like(LOC106592158) [Salmo salar]	LOC106592158	DENND1B			-1.53629					2
espn|espn	ssa15: 70701033-70804466	Stringtie	espin(espn) [Salmo salar]	espn	ESPN			-1.51461					2
MSTRG.37488|LOC106584305	ssa23: 24667845-24721992	Stringtie	F-box-like/WD repeat-containing protein TBL1XR1(LOC106584305) [Salmo salar]	LOC106584305	TBL1XR1		-1.46224						2
MSTRG.28567|LOC106573787	ssa16: 35412871-35473542	Stringtie	fatty acid 2-hydroxylase-like(LOC106573787) [Salmo salar]	LOC106573787	FA2H				-1.51536				2
MSTRG.34859|flot2b	ssa20: 63534292-63577170	Stringtie	flotillin 2b(flot2b) [Salmo salar]	flot2b	FLOT2B			-1.13517					2
MSTRG.6506|LOC106601582	ssa03: 72675784-72703733	Stringtie	glycine-rich cell wall structural protein 1.8(LOC106601582) [Salmo salar]	LOC106601582	--						-2.63991		2
MSTRG.30527|LOC106576029	ssa17: 51579253-51590426	Stringtie	GRIP and coiled-coil domain-containing protein 1-like(LOC106576029) [Salmo salar]	LOC106576029	GCC1							-2.49906	2
MSTRG.40170|iqgap1	ssa26: 34586477-34659989	Stringtie	IQ motif containing GTPase activating protein 1(iqgap1) [Salmo salar]	iqgap1	IQGAP1			-1.00259					2
MSTRG.3143|kel	ssa02: 22072970-22090365	Stringtie	Kell metallo-endopeptidase (Kell blood group)(kel) [Salmo salar]	kel	KEL							-2.46131	2
MSTRG.6703|LOC106601792	ssa03: 81272205-81357512	Stringtie	mitochondrial Rho GTPase 1-A(LOC106601792) [Salmo salar]	LOC106601792	RHOT1				-1.71485				2
MSTRG.21828|myl6	ssa12: 66776491-66787637	Stringtie	myosin, light chain 6, alkali, smooth muscle and non-muscle(myl6) [Salmo salar]	myl6	MYL6		-2.66864						2
nmt1b|nmt1b	ssa19: 62380564-62386370	Stringtie	N-myristoyltransferase 1b(nmt1b) [Salmo salar]	nmt1b	NMT1B		2.7554						2
MSTRG.14347|LOC123744257	ssa08: 24036548-24525416	Stringtie	NACHT, LRR and PYD domains-containing protein 3-like(LOC123744257) [Salmo salar]	LOC123744257	NLRP3		-1.39814						2
MSTRG.15370|LOC106611738	ssa09: 70334597-70338230	Stringtie	P2Y purinoceptor 4-like(LOC106611738) [Salmo salar]	LOC106611738	P2RY4			-1.33613					2
MSTRG.29161|LOC106574571	ssa16: 71947743-71995759	Stringtie	pericentrin(LOC106574571) [Salmo salar]	LOC106574571	PCNT				3.73255				2
MSTRG.36320|LOC106582901	ssa22: 16658054-16673558	Stringtie	PHD finger protein 20(LOC106582901) [Salmo salar]	LOC106582901	PHF20		-1.04463						2
MSTRG.37796|LOC106584718	ssa23: 44035042-44044790	Stringtie	poly (ADP-ribose) polymerase family, member 16(LOC106584718) [Salmo salar]	LOC106584718	PARP16		-1.3218						2
MSTRG.27836|LOC106572698	ssa15: 96873949-96894063	Stringtie	probable E3 ubiquitin-protein ligase DTX3(LOC106572698) [Salmo salar]	LOC106572698	DTX3							-2.063	2
MSTRG.26879|LOC106571529	ssa15: 41753728-41903659	Stringtie	protein enabled homolog(LOC106571529) [Salmo salar]	LOC106571529	ENAH				-7.79372				2
MSTRG.39157|LOC106586465	ssa25: 27394942-27471069	Stringtie	protein ITPRID2(LOC106586465) [Salmo salar]	LOC106586465	ITPRID2				2.06299				2
MSTRG.14039|LOC106610066	ssa08: 10131975-10183512	Stringtie	protein WWC2-like(LOC106610066) [Salmo salar]	LOC106610066	WWC2				1.92345				2
MSTRG.28707|r3hdm4	ssa16: 42528320-42537031	Stringtie	R3H domain containing 4(r3hdm4) [Salmo salar]	r3hdm4	R3HDM4			1.34823					2
MSTRG.32776|rab18a	ssa19: 18149099-18267205	Stringtie	RAB18A, member RAS oncogene family(rab18a) [Salmo salar]	rab18a	RAB18						1.02171		2
MSTRG.37719|LOC106584595	ssa23: 39626636-39729303	Stringtie	receptor-type tyrosine-protein phosphatase eta-like(LOC106584595) [Salmo salar]	LOC106584595	PTPRJ		-1.45174						2
MSTRG.12676|LOC123743727	ssa07: 4252567-4402801	Stringtie	RNA-binding protein 20-like(LOC123743727) [Salmo salar]	LOC123743727	RBM20			-3.66146					2
MSTRG.46544|LOC106592282	NW_025549836.1: 3657-49873	Stringtie	serine/threonine-protein kinase receptor R3(LOC106592282) [Salmo salar]	LOC106592282	ACVRL1		-4.92245	4.95857					2
MSTRG.13858|LOC106609968	ssa08: 4116678-4168928	Stringtie	SLAM family member 5-like(LOC106609968) [Salmo salar]	LOC106609968	CD84		-1.42629						2
MSTRG.33674|LOC106603998	ssa19: 78721032-78863037	Stringtie	solute carrier family 12 member 7-like(LOC106603998) [Salmo salar]	LOC106603998	SLC12A7							-2.28422	2
MSTRG.19082|LOC106587529	ssa11: 25408794-25605858	Stringtie	SRY-box transcription factor 6(LOC106587529) [Salmo salar]	LOC106587529	SOX6				2.17031				2
MSTRG.32242|LOC106577950	ssa18: 72178333-72231973	Stringtie	sterile alpha motif domain-containing protein 9-like(LOC106577950) [Salmo salar]	LOC106577950	SAMD9L		3.35046	-2.64768			-3.32953		2
MSTRG.44502|LOC106599796	NW_025548330.1: 415912-500247	Stringtie	stonustoxin subunit beta-like(LOC106599796) [Salmo salar]	LOC106599796	--							-1.43016	2
MSTRG.27718|LOC106572567	ssa15: 90961318-90972044	Stringtie	telomere zinc finger-associated protein(LOC106572567) [Salmo salar]	LOC106572567	ZBTB48				-1.07707				2
MSTRG.9723|LOC106605056	ssa05: 50299722-50305986	Stringtie	thyrotropin-releasing hormone receptor(LOC106605056) [Salmo salar]	LOC106605056	TRHR			-1.3105					2
MSTRG.46177|LOC106591770	NW_025549545.1: 77211-193145	Stringtie	trinucleotide repeat-containing gene 18 protein-like(LOC106591770) [Salmo salar]	LOC106591770	TNRC18		-3.10535						2
MSTRG.7034|LOC106592132	ssa03: 100500396-100532875	Stringtie	trinucleotide repeat-containing gene 6A protein(LOC106592132) [Salmo salar]	LOC106592132	TNRC6A				4.51867				2
MSTRG.37909|LOC106599139	ssa23: 47944599-48010439	Stringtie	tripartite motif-containing protein 16-like(LOC106599139) [Salmo salar]	LOC106599139	TRIM16		-3.33742						2
MSTRG.43065|LOC123731935	NW_025547502.1: 25313-206548	Stringtie	tripartite motif-containing protein 16-like(LOC123731935) [Salmo salar]	LOC123731935	TRIM16		-2.5542						2
MSTRG.28017|zgc:113363	ssa15: 107022507-107035953	Stringtie	uncharacterized LOC106572953(zgc:113363) [Salmo salar]	zgc:113363	--		-1.51463						2
MSTRG.44643|LOC123732979	NW_025548399.1: 247730-258699	Stringtie	uncharacterized LOC123732979(LOC123732979) [Salmo salar]	LOC123732979	--			-1.7504					2
MSTRG.44718|LOC123733078	NW_025548464.1: 4123-27302	Stringtie	uncharacterized LOC123733078(LOC123733078) [Salmo salar]	LOC123733078	--			-3.14503					2
MSTRG.16546|LOC106613145	ssa09: 143660679-143753633	Stringtie	von Willebrand factor A domain-containing protein 5A(LOC106613145) [Salmo salar]	LOC106613145	VWA5A				-1.21948				2
MSTRG.30777|LOC106576305	ssa17: 62565306-62591078	Stringtie	zinc finger protein 135(LOC106576305) [Salmo salar]	LOC106576305	ZNF135				2.81915				2
MSTRG.4594|LOC106594126	ssa02: 79449881-79483065	Stringtie	zinc finger protein 585A(LOC106594126) [Salmo salar]	LOC106594126	ZNF585A			-1.26836					2
MSTRG.13149|zanl	ssa07: 28097868-28136568	Stringtie	zonadhesin, like(zanl) [Salmo salar]	zanl	ZAN				-1.21528				2
MSTRG.39950|LOC106587392	ssa26: 21919480-21925797	Stringtie	ammonium transporter Rh type C(LOC106587392) [Salmo salar]	LOC106587392	RHCG		-1.13042						2
MSTRG.2197|aqp3b	ssa01: 146919211-146923708	Stringtie	aquaporin 3b(aqp3b) [Salmo salar]	aqp3b	AQP3B		-1.01827						2
MSTRG.25144|LOC106569679	ssa14: 40401074-40402888	Stringtie	C-C motif chemokine 20 [Salmo salar]	ccl20	CCL20						-1.30732		2
MSTRG.27202|LOC106571916	ssa15: 64829130-64882809	Stringtie	cadherin-like protein 26 [Salmo salar]	cdh26	CDH26							-1.84729	2
MSTRG.25064|LOC106569486	ssa14: 36359159-36364495	Stringtie	carbonic anhydrase 4(LOC106569486) [Salmo salar]	LOC106569486	CA12		-3.29963						2
LOC106586067|LOC106586067	ssa25: 5078495-5356786	Stringtie	dynein axonemal heavy chain 7 [Salmo salar]	dnah7	DNAH7		-1.00916						2
MSTRG.44636|LOC123724027	NW_025548403.1: 2699-25861	Stringtie	FERM, ARHGEF and pleckstrin domain-containing protein 1-like [Salmo salar]	farp1	FARP1				-1.03847				2
MSTRG.38353|LOC106585563	ssa24: 20732044-20779731	Stringtie	fibroblast growth factor receptor 1-A-like(LOC106585563) [Salmo salar]	LOC106585563	FGFR1		-1.04999						2
MSTRG.23338|LOC106567417	ssa13: 53652512-53744493	Stringtie	glutamate receptor 1-like [Salmo salar]	gria1	GRIA1				-2.74097				2
MSTRG.43225|LOC123732099	NW_025547613.1: 422971-446961	Stringtie	NLR family CARD domain-containing protein 3-like [Salmo salar]	nlrc3	NLRC3			-3.30455					2
pappa2|pappa2	ssa03: 23823075-23887921	Stringtie	pappalysin 2(pappa2) [Salmo salar]	pappa2	PAPPA2		-1.37204	-1.47065					2
MSTRG.28253|LOC106573183	ssa16: 14219575-14224533	Stringtie	pyrin-like(LOC106573183) [Salmo salar]	LOC106573183	MEFV		-1.27767						2
MSTRG.1419|LOC106610613	ssa01: 95442911-95572117	Stringtie	serine/threonine-protein kinase WNK4(LOC106610613) [Salmo salar]	LOC106610613	WNK4		-1.55005					-1.36	2
MSTRG.31352|wu:fj16a03	ssa18: 11979643-11985161	Stringtie	uncharacterized LOC106576749 [Salmo salar]	LOC106576749	--			-1.00359	-1.06487				2
MSTRG.31460|LOC106594980	ssa18: 18176016-18186609	Stringtie	uncharacterized LOC106594980 [Salmo salar]	LOC106594980	--			2.87716	-3.6804				2
MSTRG.43287|LOC106595187	NW_025547630.1: 12096-14331	Stringtie	zinc-binding protein A33-like [Salmo salar]	--	--			-1.05968					2
MSTRG.20479|LOC106563991	ssa12: 4999871-5044151	Stringtie|BLASTx	actin-related protein 2/3 complex subunit 1B-B(LOC106563991) [Salmo salar]	LOC106563991	ARPC1A			2.32428					2
MSTRG.33573|LOC106579550	ssa19: 72159106-72185191	Stringtie|BLASTx	ER membrane protein complex subunit 9-like(LOC106579550) [Salmo salar]	LOC106579550	GPT2				-1.72174				2
MSTRG.33428|LOC106579089	ssa19: 63334474-63390083	Stringtie|BLASTx	alpha-tectorin(LOC106579089) [Salmo salar]	LOC106579089	TECTA							8.98502	2
MSTRG.19010|LOC106562250	ssa11: 21478756-21484892	Stringtie|BLASTx	ammonium transporter Rh type C-like(LOC106562250) [Salmo salar]	LOC106562250	RHCG		-1.41379				-1.97616		2
MSTRG.8407|aspa	ssa04: 56661805-56676961	Stringtie|BLASTx	aspartoacylase(aspa) [Salmo salar]	aspa	ASPA						2.13008		2
MSTRG.40406|LOC106594039	ssa26: 48839941-48867273	Stringtie|BLASTx	beta-1,3-galactosyltransferase 2(LOC106594039) [Salmo salar]	LOC106594039	B3GALT2		-2.13054						2
MSTRG.124|LOC106599806	ssa01: 4881670-4927656	Stringtie|BLASTx	calcineurin B homologous protein 1-like(LOC106599806) [Salmo salar]	LOC106599806	CHP1							-2.48103	2
MSTRG.36212|LOC106582757	ssa22: 10998345-11044614	Stringtie|BLASTx	caM kinase-like vesicle-associated protein(LOC106582757) [Salmo salar]	LOC106582757	CAMKV			-1.29049					2
MSTRG.25065|cah12	ssa14: 36389307-36400674	Stringtie|BLASTx	Carbonic anhydrase 12(cah12) [Salmo salar]	cah12	CA4		-3.40362						2
MSTRG.36964|LOC106583712	ssa22: 52481029-52571456	Stringtie|BLASTx	collagen alpha-1(II) chain(LOC106583712) [Salmo salar]	LOC106583712	COL2A1			-1.94293					2
MSTRG.15911|col4a3	ssa09: 106903459-107058565	Stringtie|BLASTx	somatostatin-2(LOC106612354) [Salmo salar]	LOC106612354	SST			-1.96657					2
MSTRG.15929	ssa09: 109736067-109808288	Stringtie|BLASTx	collagen alpha-5(IV) chain-like(LOC123724084) [Salmo salar]	LOC123724084	COL4A3			-1.4418					2
MSTRG.29616|LOC106595593	ssa16: 93612539-93633687	Stringtie|BLASTx	cytochrome P450 27C1-like(LOC106595593) [Salmo salar]	LOC106595593	CYP27C1				1.48765				2
MSTRG.43730|LOC106593247	NW_025548009.1: 86844-140640	Stringtie|BLASTx	epsin-2-like(LOC106593247) [Salmo salar]	LOC106593247	EPN2				-1.28285				2
MSTRG.26633|LOC106571283	ssa15: 33183890-33193650	Stringtie|BLASTx	gap junction beta-7 protein-like(LOC106571283) [Salmo salar]	LOC106571283	GJB7			-1.65084				-1.7052	2
MSTRG.11880|LOC106607426	ssa06: 47258898-47294426	Stringtie|BLASTx	GEM-interacting protein-like(LOC106607426) [Salmo salar]	LOC106607426	GMIP							-1.41981	2
MSTRG.25506|LOC106570020	ssa14: 62238962-62314379	Stringtie|BLASTx	golgin subfamily A member 4-like(LOC106597201) [Salmo salar]	LOC106597201	GOLGA4			-3.52258					2
MSTRG.25214|LOC106569615	ssa14: 44120090-44232459	Stringtie|BLASTx	hippocampus abundant transcript 1 protein(LOC106569615) [Salmo salar]	LOC106569615	MFSD14A		-5.23326						2
MSTRG.42320|LOC106590429	ssa29: 23639593-23877888	Stringtie|BLASTx	histone-lysine N-methyltransferase 2C(LOC106590429) [Salmo salar]	LOC106590429	KMT2C				-4.92421				2
MSTRG.9690|LOC123743114	ssa05: 48394121-48404890	Stringtie|BLASTx	uncharacterized LOC123743114(LOC123743114) [Salmo salar]	LOC123743114	IGKV1D-33				1.58785				2
MSTRG.8544|LOC106603670	ssa04: 64703595-64764253	Stringtie|BLASTx	endothelial cell-selective adhesion molecule(LOC106603670) [Salmo salar]	LOC106603670	IGSF11		-1.6094						2
MSTRG.18921|LOC106562099	ssa11: 18144835-18180720	Stringtie|BLASTx	inositol 1,4,5-triphosphate receptor associated 1(LOC106562099) [Salmo salar]	LOC106562099	IRAG1						4.70651		2
MSTRG.29785|itsn1	ssa17: 10074298-10146782	Stringtie|BLASTx	intersectin 1 (SH3 domain protein)(itsn1) [Salmo salar]	itsn1	ITSN1				10.3522				2
MSTRG.24122|LOC106568382	ssa13: 100575281-100592114	Stringtie|BLASTx	keratin, type I cytoskeletal 18(LOC106568382) [Salmo salar]	LOC106568382	KRT18		-1.54095	-1.04855					2
MSTRG.24122	ssa13: 100575281-100592114	Stringtie|BLASTx	keratin, type I cytoskeletal 18(LOC106568382) [Salmo salar]	LOC106568382	KRT18		-2.36694						2
MSTRG.25226|LOC106569629	ssa14: 44855787-44870681	Stringtie|BLASTx	lipoprotein lipase(LOC106569629) [Salmo salar]	LOC106569629	LPL		-1.10747						2
MSTRG.32973|LOC106578815	ssa19: 40732201-40919609	Stringtie|BLASTx	netrin receptor UNC5B-b(LOC106578815) [Salmo salar]	LOC106578815	UNC5B		-4.86525						2
MSTRG.47441	NW_025550950.1: 156036-235551	Stringtie|BLASTx	uncharacterized LOC106601298(LOC106601298) [Salmo salar]	LOC106601298	NLRC3				-1.77843				2
MSTRG.43140|otud4	NW_025547587.1: 235831-272692	Stringtie|BLASTx	OTU deubiquitinase 4(otud4) [Salmo salar]	otud4	OTUD4							25.8804	2
MSTRG.36127|ppp1r16b	ssa22: 6122286-6237859	Stringtie|BLASTx	protein phosphatase 1 regulatory subunit 16B(ppp1r16b) [Salmo salar]	ppp1r16b	PPP1R16B		-1.85708						2
MSTRG.25998|tp4a2	ssa14: 89326506-89380760	Stringtie|BLASTx	tyrosine phosphatase type IVA 2(tp4a2) [Salmo salar]	tp4a2	PTP4A2				-4.02186			4.48626	2
MSTRG.2021	ssa01: 135627801-135730891	Stringtie|BLASTx	protein unc-13 homolog B-like(LOC106565090) [Salmo salar]	LOC106565090	UNC13B				-3.10908				2
MSTRG.21628|LOC100196383	ssa12: 57730535-57748829	Stringtie|BLASTx	Ras-related protein Rab-37(LOC100196383) [Salmo salar]	LOC100196383	RAB44		-1.87611						2
MSTRG.25381|LOC106569766	ssa14: 56179559-56245846	Stringtie|BLASTx	sodium/hydrogen exchanger 3(LOC106569766) [Salmo salar]	LOC106569766	SLC9A3		-1.01515	-1.02727					2
MSTRG.93|smoc1	ssa01: 3965620-4105493	Stringtie|BLASTx	SPARC related modular calcium binding 1(smoc1) [Salmo salar]	smoc1	SMOC1				1.62091				2
MSTRG.8277|LOC106603357	ssa04: 50438377-50443887	Stringtie|BLASTx	tripartite motif-containing protein 16(LOC106603357) [Salmo salar]	LOC106603357	TRIM16			-1.13469					2
MSTRG.35571|LOC106581876	ssa21: 23002929-23023997	Stringtie|BLASTx	UDP-glucuronosyltransferase(LOC106581954) [Salmo salar]	LOC106581954	UGT3A1				-1.65525				2
MSTRG.47066|LOC123739546	NW_025550569.1: 2453-16828	Stringtie|BLASTx	von Willebrand factor A domain-containing protein 7-like(LOC123739546) [Salmo salar]	LOC123739546	VWA7			-1.97902					2
MSTRG.47066|LOC123739547	NW_025550569.1: 2453-16828	Stringtie|BLASTx	von Willebrand factor A domain-containing protein 7-like(LOC123739546) [Salmo salar]	LOC123739546	VWA7			-1.2904					2
MSTRG.13106	ssa07: 26764561-26772619	BLASTx	Ferric-chelate reductase 1 [Bos taurus]		FRRS1	25.8922			-10.0461		-11.6784		3
MSTRG.20090	ssa11: 93368982-93436719	BLASTx	Zinc finger and BTB domain-containing protein 20 [Mus musculus]		ZBTB20	9.70503							3
MSTRG.453	ssa01: 26411562-26484909	BLASTx	Signal-induced proliferation-associated 1-like protein 1 [Homo sapiens]		SIPA1L1	7.58452		-23.7676					3
MSTRG.5001	ssa03: 1939256-2087963	BLASTx	Collagen alpha-2(VI) chain [Gallus gallus]		COL6A2	7.453							3
MSTRG.27565	ssa15: 84098569-84110757	BLASTx	Protein ILRUN [Danio rerio]		ILRUN	6.12314	-6.57626						3
MSTRG.5310	ssa03: 16492221-16496444	BLASTn	uncharacterized LOC106599082 [Salmo salar]	LOC106599082	--	5.91873	6.50556						3
MSTRG.43680	NW_025547987.1: 126752-128832	BLASTn	uncharacterized LOC106565025 (LOC106565025), transcript variant X2, mRNA [Salmo salar]	LOC106565025	--	5.01323							3
MSTRG.47232	NW_025550919.1: 470003-475628	BLASTx	Transposable element Tcb1 transposase [Caenorhabditis briggsae]		--	4.85216	-5.23915						3
MSTRG.43698	NW_025547989.1: 148434-153998	BLASTn	uncharacterized LOC118965959 [Oncorhynchus mykiss]		--	4.78146				5.29095			3
MSTRG.31389	ssa18: 13623260-13629281	BLASTn	uncharacterized LOC106576710 [Salmo salar]	LOC106576710	--	4.47413		4.8503					3
MSTRG.44347	NW_025548272.1: 298380-306071	BLASTx	Polyadenylate-binding protein 1A [Danio rerio]		PABPC1	4.15123		4.29264					3
MSTRG.28887|LOC123727945	ssa16: 53290732-53305437	Stringtie|BLASTx	small nucleolar RNA SNORA57(LOC123727945) [Salmo salar]	LOC123727945	NCL	4.1389							3
MSTRG.27962|emd	ssa15: 103037996-103046002	Stringtie|BLASTx	emerin(emd) [Salmo salar]	emd	EMD	4.01543							3
MSTRG.23430	ssa13: 60609788-60626512	BLASTx	GTP-binding protein SAR1a [Bos taurus]		SAR1A	3.74749							3
MSTRG.40007	ssa26: 25196317-25217199	Stringtie|BLASTx	Serum amyloid A-5 protein(saa5) [Salmo salar]	saa5	SAA2	3.42355							3
MSTRG.8923|LOC106604067	ssa04: 89951642-89986121	Stringtie|BLASTx	dihydrolipoamide S-acetyltransferase (E2 component of pyruvate dehydrogenase complex)(LOC106604067) [Salmo salar]	LOC106604067	DLAT	3.25361							3
MSTRG.3884|ccdc40	ssa02: 54253686-54267572	Stringtie|BLASTx	coiled-coil domain containing 40(ccdc40) [Salmo salar]	ccdc40	CCDC40	2.887							3
MSTRG.43706	NW_025547989.1: 419954-425523	BLASTn	uncharacterized LOC118965959 (LOC118965959), transcript variant X4, ncRNA [Oncorhynchus mykiss]		--	2.88396							3
MSTRG.13790|LOC106609751	ssa07: 66403317-66466050	Stringtie|BLASTx	tetraspanin-8(LOC106609751) [Salmo salar]	LOC106609751	TSPAN8	2.86532					-3.94054		3
MSTRG.38382	ssa24: 22340463-22346611	BLASTx	Probable RNA-directed DNA polymerase from transposon X-element [Drosophila melanogaster]		--	2.63062	-3.29133						3
MSTRG.36288|LOC106582854	ssa22: 14681798-14895723	Stringtie	forkhead box protein P1-B-like(LOC106582854) [Salmo salar]	LOC106582854	FOXP1	2.57052							3
MSTRG.39780	ssa26: 13625861-13700184	BLASTx	Phosphorylase b kinase regulatory subunit beta [Oryctolagus cuniculus]		PHKB	2.39648			-3.8503				3
MSTRG.35119	ssa20: 82770552-82828184	BLASTx	Angiomotin-like protein 1 [Bos taurus]		AMOTL1	2.27132							3
MSTRG.5938	ssa03: 52254778-52298803	BLASTx	Apoptosis regulator BAX [Bos taurus]		BAX	2.24042							3
MSTRG.7764|LOC106602700	ssa04: 24795648-24815568	Stringtie|BLASTx	uncharacterized LOC106602700(LOC106602700) [Salmo salar]	LOC106602700	GTF2IRD2B	2.22802							3
MSTRG.39101	ssa25: 22204369-22216781	BLASTx	Very-long-chain (3R)-3-hydroxyacyl-CoA dehydratase 2 [Homo sapiens]		HACD2	2.08992							3
MSTRG.41853	ssa28: 28729857-28744582	BLASTx	Ribonuclease T2 [Homo sapiens]		RNASET2	1.91888							3
MSTRG.39406	ssa25: 40945994-40964286	BLASTx	60S ribosomal protein L8 [Danio rerio]		RPL8	1.91501							3
MSTRG.37439|LOC106584206	ssa23: 22554571-22580706	Stringtie	FYN-binding protein 1(LOC106584206) [Salmo salar]	LOC106584206	FYB1	1.88535							3
MSTRG.19742|LOC106563117	ssa11: 76489952-76502383	Stringtie	adenosine receptor A2b(LOC106563117) [Salmo salar]	LOC106563117	ADORA2B	1.77935							3
MSTRG.20801	ssa12: 17486584-17523614	BLASTx	B-cell receptor CD22 [Homo sapiens]		CD22	1.62562							3
MSTRG.9908	ssa05: 58786196-58798713	BLASTx	Protein rapunzel [Danio rerio]		--	1.61953							3
MSTRG.27123	ssa15: 59518810-59534618	BLASTx	Retrotransposon-like protein 1 [Bos taurus]		RTL1	1.53933							3
MSTRG.4551|LOC106592903	ssa02: 77220358-77248504	Stringtie|BLASTx	breast cancer anti-estrogen resistance protein 3 homolog(LOC106592903) [Salmo salar]	LOC106592903	BCAR3	1.53423							3
MSTRG.45262	NW_025548761.1: 558007-560068	BLASTx	Stonustoxin subunit beta [Synanceia horrida]		--	1.47006							3
lamb4|lamb4	ssa16: 10783813-10801635	Stringtie	laminin, beta 4(lamb4) [Salmo salar]	lamb4	LAMB4	1.44233							3
MSTRG.9253|nkx3-2	ssa05: 21040967-21043061	Stringtie	NK3 homeobox 2(nkx3-2) [Salmo salar]	nkx3-2	NKX3-2	1.2779	1.46643		2.25141				3
MSTRG.11585|LOC106607153	ssa06: 35425842-35539278	Stringtie|BLASTx	interferon-induced very large GTPase 1(LOC106607153) [Salmo salar]	LOC106607153	PICK1	1.23908							3
MSTRG.15894	ssa09: 105559233-105618853	BLASTx	Adapter SH3BGRL [Homo sapiens]		SH3BGRL	1.20281							3
MSTRG.46422|LOC106597121	NW_025549714.1: 15063-47494	Stringtie	uncharacterized LOC106597121(LOC106597121) [Salmo salar]	LOC106597121	URGCP-MRPS24	1.18341							3
MSTRG.3021	ssa02: 18230021-18233149	BLASTx	Protein S100-A11 [Oryctolagus cuniculus]		S100A11	-1.25562							3
LOC106564606|LOC106564606	ssa12: 25294706-25323305	Stringtie	girdin-like(LOC106564606) [Salmo salar]	LOC106564606	CCDC88A	-1.27556							3
MSTRG.5063	ssa03: 4669158-4722928	BLASTx	Twisted gastrulation protein homolog 1 [Pongo abelii]		TWSG1	-1.31805							3
MSTRG.26557	ssa15: 28750009-28817053	Stringtie|BLASTx	Rh associated glycoprotein(rhag) [Salmo salar]	rhag	RHAG	-1.56285							3
MSTRG.5413	ssa03: 22984314-23060407	BLASTx	Laminin subunit gamma-1 [Xenopus tropicalis]		LAMC1	-1.87593							3
MSTRG.44863	NW_025548511.1: 528989-531922	No BLAST hit	--		--	-1.91998							3
MSTRG.34994	ssa20: 71292406-71339736	BLASTx	CUE domain-containing protein 1 [Homo sapiens]		CUEDC1	-7.81201						10.0897	3
MSTRG.33932	ssa20: 14711141-14721926	BLASTx	Ankyrin repeat domain-containing protein 13A [Mus musculus]		ANKRD13A					-1.09371			3
MSTRG.43109	NW_025547552.1: 35264-39615	BLASTn	potassium-transporting ATPase alpha chain 1 (LOC129837229), transcript variant X2, mRNA [Salvelinus fontinalis]		ATP1A1					-6.57245			3
MSTRG.4962	ssa03: 84634-93073	BLASTx	C-type lectin domain family 4 member M [Symphalangus syndactylus]		CLEC4M					24.2245			3
MSTRG.33698	ssa19: 81116700-81142567	BLASTx	All trans-polyprenyl-diphosphate synthase PDSS1 [Homo sapiens]		PDSS1					-24.3837			3
MSTRG.37438	ssa23: 22536722-22554713	BLASTx	5'-AMP-activated protein kinase catalytic subunit alpha-1 [Rattus norvegicus]		PRKAA1					-2.25707			3
MSTRG.6002	ssa03: 54593725-54606925	BLASTx	Mitochondrial dynamics protein MID51 [Danio rerio]		MIEF1					-1.64903			3
MSTRG.26073	ssa14: 92357643-92363279	BLASTx	Transposable element Tc1 transposase [Caenorhabditis elegans]		--					-26.9203			3
MSTRG.29932	ssa17: 18449400-18538508	BLASTx	Pituitary tumor-transforming gene 1 protein-interacting protein [Mus musculus]		PTTG1IP				-2.01131	-2.19431			3
MSTRG.36859	ssa22: 44307985-44329429	BLASTx	WD repeat-containing protein 1 [Gallus gallus]		WDR1					-2.88713			3
MSTRG.36992|LOC106583744	ssa22: 54312182-54794867	Stringtie|BLASTx	protein SSUH2 homolog(LOC106583744) [Salmo salar]	LOC106583744	SSUH2					1.27568			3
MSTRG.13652	ssa07: 55618040-55644598	BLASTx	Nucleosome assembly protein 1-like 1-A [Xenopus laevis]		NAP1L1			1.02154		2.67062	-2.25422		3
MSTRG.27657	ssa15: 87703431-87706284	BLASTx	Sulfiredoxin-1 [Mus musculus]		SRXN1					-3.073			3
MSTRG.8240	ssa04: 49132078-49167082	BLASTx	Moesin/ezrin/radixin homolog 1 [Culex quinquefasciatus]		MSN					1.26922			3
MSTRG.32409	ssa18: 79346479-79369383	BLASTx	Circularly permutated Ras protein 1 [Dictyostelium discoideum]		--		-4.52087			-8.00758			3
MSTRG.41074	ssa27: 26100941-26207577	BLASTx	Collagen alpha-2(VIII) chain [Mus musculus]		COL8A2					-10.4647			3
MSTRG.41517	ssa28: 10412434-10415432	BLASTx	Transposable element Tcb1 transposase [Caenorhabditis briggsae]		--					-1.45156			3
MSTRG.23019|LOC106567195	ssa13: 36605195-36611005	Stringtie	uncharacterized LOC106567195(LOC106567195) [Salmo salar]	LOC106567195	--					1.79406			3
MSTRG.34795	ssa20: 60354661-60402699	BLASTx	Cullin-5 [Caenorhabditis elegans]		CUL5					-6.11715			3
MSTRG.12054	ssa06: 60204204-60216655	BLASTx	Katanin p60 ATPase-containing subunit A-like 1 [Papio anubis]		KATNAL1					-2.65004			3
MSTRG.26780	ssa15: 35808591-35874438	Stringtie|BLASTx	mitogen-activated protein kinase kinase kinase 5-like(LOC106571336) [Salmo salar]	LOC106571336	MAP3K5			1.10494					3
MSTRG.44500	NW_025548330.1: 398414-432663	BLASTn	pleckstrin [Salmo salar]	plekhh3	PLEKHH3			4.09168					3
MSTRG.44049	NW_025548112.1: 460501-461861	BLASTn	ATP synthase subunit f, mitochondrial-like (LOC123732717), transcript variant X3, misc_RNA [Salmo salar]	LOC123732717	ATP5MF		-2.46346						3
MSTRG.45263	NW_025548761.1: 560473-569310	BLASTn	E3 ubiquitin/ISG15 ligase TRIM25-like (LOC129845689), transcript variant X1, mRNA [Salvelinus fontinalis]		TRIM25			-1.4305					3
MSTRG.2639	ssa01: 172909606-172910725	BLASTn	insulin receptor substrate 1-B-like (LOC129835267), mRNA [Salvelinus fontinalis]		IRS1				-2.61989				3
MSTRG.30822	ssa17: 65455940-65459131	BLASTn	keratin-associated protein 4-7-like (LOC129817852), transcript variant X2, misc_RNA [Salvelinus fontinalis]		KRTAP4-7				-7.3555				3
MSTRG.43334	NW_025547636.1: 205374-212488	BLASTn	NLR family CARD domain-containing protein 3-like (LOC129843420), transcript variant X5, mRNA [Salvelinus fontinalis]		NLRC3			2.38311					3
MSTRG.44842	NW_025548509.1: 38354-39238	BLASTn	probable 28S rRNA (cytosine-C(5))-methyltransferase [Salvelinus fontinalis]		NSUN5		-5.72588						3
MSTRG.14246|LOC106610434	ssa08: 21338495-21355272	Stringtie	semaphorin-4F-like(LOC106610434) [Salmo salar]	LOC106610434	SEMA4F				-1.30061				3
MSTRG.23254	ssa13: 47826175-47829488	BLASTn	somatostatin receptor type 2-like [Oncorhynchus keta]		SSTR2						-9.46291		3
MSTRG.10873	ssa06: 2986408-2988416	BLASTn	uncharacterized LOC106601298 (LOC106601298), ncRNA [Salmo salar]	LOC106601298	--			8.71563					3
MSTRG.14642|LOC106610883	ssa09: 18252979-18261161	BLASTn	uncharacterized LOC106610883 [Salmo salar]	LOC106610883	--			1.07029					3
MSTRG.4434	ssa02: 73778574-73788055	BLASTn	uncharacterized LOC123744616 (LOC123744616), ncRNA [Salmo salar]	LOC123744616	--				5.63242				3
MSTRG.42033	ssa28: 40773217-40774171	BLASTn	uncharacterized LOC127908905 (LOC127908905), transcript variant X21, ncRNA [Oncorhynchus keta]		--			2.13841					3
MSTRG.43157	NW_025547589.1: 34307-36510	BLASTn	uncharacterized LOC129814602 [Salvelinus fontinalis]		--				-2.70777				3
MSTRG.44499	NW_025548330.1: 392102-426673	BLASTn	uncharacterized LOC129859516 [Salvelinus fontinalis]		--			4.8462					3
MSTRG.12849	ssa07: 15955201-15961443	BLASTn	uncharacterized si:ch211-119e14.1 [Salmo salar]	--	--				-1.0549				3
MSTRG.10913	ssa06: 6281686-6295799	BLASTn	uncharacterized si:ch211-76l23.4 (si:ch211-76l23.4), mRNA [Oncorhynchus tshawytscha]		--		-1.58333						3
MSTRG.19734	ssa11: 76209849-76222315	BLASTx	3-galactosyl-N-acetylglucosaminide 4-alpha-L-fucosyltransferase FUT3 [Homo sapiens]		FUT3				-1.23211				3
MSTRG.38736	ssa24: 42018191-42043911	BLASTx	39S ribosomal protein L1, mitochondrial [Mus musculus]		MRPL1				-3.57108				3
MSTRG.11323	ssa06: 27608199-28112270	BLASTx	Acid-sensing ion channel 2 [Danio rerio]		ASIC2		-7.66048		-8.1907				3
MSTRG.41593	ssa28: 14068104-14087211	BLASTx	Aconitate hydratase, mitochondrial [Rattus norvegicus]		ACO2		-12.8196						3
MSTRG.31873	ssa18: 54921215-55090860	BLASTx	Actin filament-associated protein 1 [Gallus gallus]		AFAP1						-7.62462		3
MSTRG.41466	ssa28: 6993561-7002844	BLASTx	Actin, aortic smooth muscle [Homo sapiens]		ACTA2		-12.0921						3
MSTRG.12507	ssa06: 89328977-89397626	BLASTx	Adhesion G protein-coupled receptor L2 [Homo sapiens]		ADGRL2						-4.35339		3
MSTRG.2322	ssa01: 155010807-155020205	BLASTx	Ankyrin-3 [Homo sapiens]		ANK3				-1.13274				3
MSTRG.508	ssa01: 29255026-29266436	BLASTx	Ataxin-3 [Rattus norvegicus]		ATXN3			-6.43381					3
MSTRG.10582	ssa05: 82768880-82793222	BLASTx	ATP-binding cassette sub-family B member 5 [Mus musculus]		ABCB5				-1.72822				3
MSTRG.22056	ssa12: 82592525-82600588	BLASTx	Bactericidal permeability-increasing protein [Homo sapiens]		BPI				-8.24969				3
MSTRG.9160	ssa05: 14477257-14487726	BLASTx	Beta-2 adrenergic receptor [Oncorhynchus mykiss]		ADRB2		-23.8236						3
MSTRG.36079	ssa22: 2626504-2635505	BLASTx	Bladder cancer-associated protein [Carassius auratus]		BLCAP			1.04682					3
MSTRG.45253	NW_025548761.1: 225174-228706	BLASTx	Butyrophilin subfamily 3 member A1 [Homo sapiens]		BTN3A1						-2.50218		3
MSTRG.30519	ssa17: 51303677-51318960	BLASTx	Calumenin-A [Salmo salar]	calu	CALU				2.01708				3
MSTRG.18087|LOC106560836	ssa10: 87757208-87795106	BLASTx	Capping protein, Arp2/3 and myosin-I linker protein 3 [Mus musculus]		CARMIL3						-1.07962		3
MSTRG.32615	ssa19: 6178830-6326597	BLASTx	Coiled-coil domain-containing protein 186 [Pongo abelii]		CCDC186		-1.3986						3
MSTRG.11834	ssa06: 44755881-44779086	BLASTx	Collagen alpha-1(I) chain [Gallus gallus]		COL1A1				-15.2372				3
MSTRG.42913	NW_025547379.1: 368-34598	BLASTx	Condensin complex subunit 3 [Xenopus laevis]		NCAPG			7.05855					3
MSTRG.26499	ssa15: 25570954-25577594	BLASTx	Creatine kinase B-type [Homo sapiens]		CKB				-5.93359		-6.78348		3
MSTRG.30195	ssa17: 29570072-29580416	BLASTx	Cyclic AMP-dependent transcription factor ATF-1 [Homo sapiens]		ATF1		-6.61861						3
MSTRG.23462	ssa13: 64563958-64585301	BLASTx	Cytosolic arginine sensor for mTORC1 subunit 2 [Homo sapiens]		CASTOR2							-6.85216	3
MSTRG.45354	NW_025548797.1: 54406-62485	BLASTx	Deoxyribonuclease gamma [Homo sapiens]		DNASE1L3			1.20159					3
MSTRG.44450	NW_025548332.1: 83987-84704	BLASTx	E3 ubiquitin-protein ligase TRIM11 [Mus musculus]		TRIM11		-1.94973						3
MSTRG.45847	NW_025549157.1: 124193-127764	BLASTx	E3 ubiquitin-protein ligase TRIM16 [Pongo abelii]		TRIM16		-1.10105						3
MSTRG.44912	NW_025548549.1: 584689-693419	BLASTx	E3 ubiquitin/ISG15 ligase TRIM25 [Homo sapiens]		TRIM25		-1.04958						3
MSTRG.39583	ssa26: 676164-680798	BLASTx	Endothelial differentiation-related factor 1 homolog [Danio rerio]		EDF1							-1.03428	3
MSTRG.12748	ssa07: 11054667-11077430	BLASTx	Epididymis-specific alpha-mannosidase [Mus musculus]		MAN2B2			4.0981					3
MSTRG.39287	ssa25: 34116547-34158712	BLASTx	Follistatin-related protein 1 [Bos taurus]		FSTL1			-1.0425					3
MSTRG.37183	ssa23: 2428787-2443376	BLASTx	Fructose-bisphosphate aldolase A [Salmo salar]	aldoa	ALDOA						-3.26525		3
MSTRG.24539	ssa14: 11732249-11757178	BLASTx	Gelsolin [Gallus gallus]		GSN						-2.67133		3
MSTRG.9081	ssa05: 10190996-10261404	BLASTx	Glucocorticoid receptor [Saimiri boliviensis boliviensis]		NR3C1				-2.16666				3
MSTRG.18432	ssa10: 111132858-111158036	BLASTx	Glucose-6-phosphate isomerase [Yersinia enterocolitica subsp. enterocolitica 8081]		GPI						-3.12669		3
MSTRG.24671	ssa14: 17313054-17426676	BLASTx	Glypican-1 [Danio rerio]		GPC1		-2.13611		1.46881				3
MSTRG.46728	NW_025550060.1: 22821-68919	BLASTx	Guanylate-binding protein 2 [Rattus norvegicus]		GBP2		-1.26365						3
MSTRG.27540	ssa15: 83060152-83145491	BLASTx	Histone deacetylase 7 [Homo sapiens]		HDAC7				-6.36124				3
MSTRG.36864	ssa22: 45135462-45197287	BLASTx	Homeobox protein MSX-1 [Homo sapiens]		MSX1							-3.47412	3
MSTRG.30771	ssa17: 62481177-62481854	BLASTx	Ig kappa chain V-III region VH [Homo sapiens]		IGKV3-11				-5.7578				3
MSTRG.36043	ssa21: 58489756-58490919	BLASTx	KH domain-containing protein 3 [Rattus norvegicus]		KHDC3L		-3.35756						3
MSTRG.8468	ssa04: 60403816-60417060	BLASTx	Leucine-rich repeat and WD repeat-containing protein 1 [Danio rerio]		LRWD1							2.85121	3
MSTRG.23401	ssa13: 58596001-58600395	BLASTx	Leukocyte cell-derived chemotaxin-2 [Mus musculus]		LECT2		-1.16955						3
MSTRG.17233	ssa10: 29527415-29538305	BLASTx	Methylcrotonoyl-CoA carboxylase subunit alpha, mitochondrial [Homo sapiens]		MCCC1			-5.01343				9.15546	3
MSTRG.44732	NW_025548454.1: 3028-117187	BLASTx	Methylsterol monooxygenase 1 [Danio rerio]		MSMO1			1.11053					3
MSTRG.18813	ssa11: 9978766-9995140	BLASTx	Mitochondrial carrier homolog 2 [Mus musculus]		MTCH2		-1.07142						3
MSTRG.8284	ssa04: 50525130-50534107	BLASTx	Myelin protein zero-like protein 2 [Mus musculus]		MPZL2		7.17748						3
MSTRG.11602	ssa06: 35957016-36005586	BLASTx	Myocardin-related transcription factor B [Mus musculus]		MRTFB						4.03162		3
MSTRG.46056	NW_025549392.1: 14138-42624	BLASTx	N-acetyllactosaminide alpha-1,3-galactosyltransferase [Mus musculus]		GGTA1				-2.86923				3
MSTRG.4481	ssa02: 75180025-75253365	BLASTx	NACHT, LRR and PYD domains-containing protein 12 [Mus musculus]		NLRP12		-1.3265						3
MSTRG.47043	NW_025550551.1: 30580-31417	BLASTx	NEDD4-binding protein 2 [Homo sapiens]		N4BP2			23.5492				23.6579	3
MSTRG.758	ssa01: 43883972-43985460	BLASTx	Nesprin-1 [Homo sapiens]		SYNE1				-1.16981				3
MSTRG.33293	ssa19: 57334634-57363763	BLASTx	NLR family CARD domain-containing protein 3 [Homo sapiens]		NLRC3		-10.751				-10.2151		3
MSTRG.44649	NW_025548399.1: 347294-397514	BLASTx	NLR family CARD domain-containing protein 3 [Homo sapiens]		NLRC3				-1.29664				3
MSTRG.6351	ssa03: 67666791-67670888	BLASTx	Nuclear factor interleukin-3-regulated protein [Danio rerio]		NFIL3		8.56709						3
MSTRG.25884|LOC106570420	ssa14: 82032389-82053008	BLASTx	Otolith matrix protein OMM-64 [Oncorhynchus mykiss]		--				-2.27965				3
MSTRG.44841	NW_025548509.1: 33137-36803	BLASTx	Phosphoribosyl pyrophosphate synthase-associated protein 1 [Bos taurus]		PRPSAP1		-4.02343						3
MSTRG.17321	ssa10: 33222972-33253615	BLASTx	Platelet-derived growth factor receptor alpha [Homo sapiens]		PDGFRA		10.1844						3
MSTRG.39871	ssa26: 18642004-18732782	BLASTx	Polypeptide N-acetylgalactosaminyltransferase 18 [Homo sapiens]		GALNT18			5.7384					3
MSTRG.45264	NW_025548761.1: 569711-570439	BLASTx	Probable E3 ubiquitin-protein ligase MID2 [Homo sapiens]		MID2			-2.32436					3
MSTRG.41976	ssa28: 37872643-37888846	BLASTx	Prosaposin [Bos taurus]		GPR37			-2.98568					3
MSTRG.17415	ssa10: 39389600-39402621	BLASTx	Protein brambleberry [Danio rerio]		--		-9.74383						3
MSTRG.23781	ssa13: 83874331-83879681	BLASTx	Protein CWC15 homolog [Danio rerio]		CWC15			2.33849					3
MSTRG.45773	NW_025549127.1: 22-33771	BLASTx	Protein NLRC3 [Mus musculus]		NLRC3			1.31355					3
MSTRG.34387	ssa20: 37843879-38010957	BLASTx	Protein patched homolog 1 [Homo sapiens]		PTCH1		-3.23287						3
MSTRG.26786	ssa15: 36129441-36135683	BLASTx	Protein THEMIS [Homo sapiens]		THEMIS				-1.11817				3
MSTRG.9978	ssa05: 60900988-60914917	BLASTx	Putative DMBT1-like protein [Mus musculus]		DMBT1		-1.14501						3
MSTRG.25091	ssa14: 37883425-38009405	BLASTx	Receptor-type tyrosine-protein phosphatase F [Mus musculus]		PTPRF		2.48261		-2.22834				3
MSTRG.23700	ssa13: 80900054-80908981	BLASTx	Retrovirus-related Pol polyprotein from transposon gypsy [Drosophila melanogaster]		--		-1.00882						3
MSTRG.30926	ssa17: 71937253-71947102	BLASTx	RNA-directed DNA polymerase from mobile element jockey [Drosophila funebris]		--			8.86665					3
MSTRG.47123	NW_025550733.1: 341-7024	BLASTx	RNA-directed DNA polymerase from mobile element jockey [Drosophila melanogaster]		--							-1.75682	3
MSTRG.36318	ssa22: 16566920-16586244	BLASTx	Short transient receptor potential channel 4-associated protein [Homo sapiens]		TRPC4AP						-1.3166		3
MSTRG.28745	ssa16: 44516835-44523189	BLASTx	Small glutamine-rich tetratricopeptide repeat-containing protein alpha [Homo sapiens]		SGTA		1.72569						3
MSTRG.795	ssa01: 45361555-45562684	BLASTx	Stonin-2 [Rattus norvegicus]		STON2			-1.35087					3
MSTRG.11904	ssa06: 49329864-49376842	BLASTx	T-cell activation Rho GTPase-activating protein [Homo sapiens]		TAGAP				-3.91333				3
MSTRG.25952	ssa14: 86114710-86158332	BLASTx	TBC1 domain family member 5 [Homo sapiens]		TBC1D5						-24.6827		3
MSTRG.39999	ssa26: 24824133-24838304	BLASTx	Transcription factor PU.1 [Sus scrofa]		SPI1				-1.3004				3
MSTRG.40963	ssa27: 21829232-21849578	BLASTx	Transmembrane protein 106A [Rattus norvegicus]		TMEM106A			7.21474					3
MSTRG.13950	ssa08: 7950477-7951943	BLASTx	Transposable element Tc1 transposase [Caenorhabditis elegans]		--							-7.45243	3
MSTRG.1921	ssa01: 131818688-131832590	BLASTx	Transposable element Tc1 transposase [Caenorhabditis elegans]		--						-1.07583		3
MSTRG.46124|LOC106590934	NW_025549500.1: 14432-52256	BLASTx	Transposable element Tcb1 transposase [Caenorhabditis briggsae]		--		-2.58158						3
MSTRG.4990	ssa03: 1841606-1844629	BLASTx	Transposable element Tcb1 transposase [Caenorhabditis briggsae]		--				-7.27123				3
MSTRG.16995	ssa10: 17710862-17720966	BLASTx	Transposon Tf2-3 polyprotein [Schizosaccharomyces pombe 972h-]		--		-4.79922						3
MSTRG.16996	ssa10: 17724323-17756127	BLASTx	Transposon Tf2-3 polyprotein [Schizosaccharomyces pombe 972h-]		--		-3.91731						3
MSTRG.15999	ssa09: 114442020-114444718	BLASTx	U1 small nuclear ribonucleoprotein A [Bos taurus]		SNRPA							-3.61761	3
MSTRG.28365	ssa16: 22665549-22691172	BLASTx	Ubiquitin-conjugating enzyme E2 1 [Arabidopsis thaliana]		UBE2V1			-2.89539					3
MSTRG.41524	ssa28: 10642698-10707286	BLASTx	Uncharacterized protein B0495.5 [Caenorhabditis elegans]		--				-10.1051				3
MSTRG.46178	NW_025549618.1: 53790-63394	BLASTx	Uncharacterized protein C18orf19 homolog B [Danio rerio]		C18orf19			10.1484					3
MSTRG.29527	ssa16: 85939653-86097057	BLASTx	Vacuolar protein sorting-associated protein 8 homolog [Homo sapiens]		VPS8		4.74781						3
MSTRG.39235	ssa25: 31196994-31242006	BLASTx	Zinc finger MYM-type protein 4 [Mus musculus]		ZMYM4							-5.54058	3
MSTRG.37755	ssa23: 41494181-41509247	BLASTx	Zinc finger protein 143 [Mus musculus]		ZNF143			1.45382					3
MSTRG.19196	ssa11: 33926837-33935018	BLASTx	Zinc finger protein RFP [Homo sapiens]		TRIM27				-1.08233				3
MSTRG.29933	ssa17: 18533518-18534566	No BLAST hit	--		--				-1.51968				3
MSTRG.42539	ssa29: 40900202-40927786	No BLAST hit	--		--							-8.9509	3
MSTRG.12662|an32a	ssa07: 3095994-3105816	Stringtie	Acidic leucine-rich nuclear phosphoprotein 32 family member A(an32a) [Salmo salar]	an32a	ANP32A							-2.49614	3
MSTRG.7118|LOC123723806	ssa03: 101663933-101769347	Stringtie	C-type lectin domain family 4 member E-like(LOC123723806) [Salmo salar]	LOC123723806	CLEC4E			2.79601					3
MSTRG.9701|LOC106605039	ssa05: 48704953-48714924	Stringtie	calcium homeostasis modulator protein 6-like(LOC106605039) [Salmo salar]	LOC106605039	CALHM6				-1.52591				3
MSTRG.30123|LOC100136514	ssa17: 26163015-26177624	Stringtie	CD3zeta-2(LOC100136514) [Salmo salar]	LOC100136514	CD247						-1.46328		3
MSTRG.24271|LOC106568572	ssa13: 110675671-110714810	Stringtie	ceramide glucosyltransferase(LOC106568572) [Salmo salar]	LOC106568572	UGCG							-1.27164	3
MSTRG.16787|LOC123724368	ssa10: 56212-78927	Stringtie	chromodomain-helicase-DNA-binding protein 1-like(LOC123724368) [Salmo salar]	LOC123724368	CHD1L		-2.5641						3
MSTRG.10574|LOC106573398	ssa05: 81964797-81984877	Stringtie	complement C4(LOC106573398) [Salmo salar]	LOC106573398	C4A				-1.89134				3
MSTRG.38403|LOC106585516	ssa24: 23711482-23772186	Stringtie	E3 ubiquitin-protein ligase DTX1(LOC106585516) [Salmo salar]	LOC106585516	DTX1				-3.17294				3
MSTRG.46064|LOC123738263	NW_025549405.1: 1200-52423	Stringtie	globoside alpha-1,3-N-acetylgalactosaminyltransferase 1-like(LOC123738263) [Salmo salar]	LOC123738263	GBGT1		-3.1934		-3.77209				3
MSTRG.30838|LOC106576389	ssa17: 65686309-65688139	Stringtie	Ig kappa-b4 chain C region-like(LOC106576389) [Salmo salar]	LOC106576389	IGKC				-2.87352				3
MSTRG.6199|LOC106601102	ssa03: 63316623-63339800	Stringtie	interleukin-21 receptor-like(LOC106601102) [Salmo salar]	LOC106601102	IL21R		-1.10537						3
MSTRG.7670	ssa04: 21110661-21164699	Stringtie	lectin(LOC106602581) [Salmo salar]	LOC106602581	--				-3.1229				3
MSTRG.25243|LOC106569714	ssa14: 45156404-45179967	Stringtie	low-density lipoprotein receptor class A domain-containing protein 1(LOC106569714) [Salmo salar]	LOC106569714	LDLRAD1		-1.23649						3
MSTRG.35056|LOC106581353	ssa20: 76010129-76022556	Stringtie	lysophosphatidic acid receptor 6-like(LOC106581353) [Salmo salar]	LOC106581353	LPAR6		-1.35492						3
MSTRG.42693|LOC106597325	NW_025547068.1: 7871-149416	Stringtie	NACHT, LRR and PYD domains-containing protein 12-like(LOC106597325) [Salmo salar]	LOC106597325	NLRP12				-2.37206				3
MSTRG.9981|LOC106605374	ssa05: 60979879-60993227	Stringtie	NADH dehydrogenase (ubiquinone) complex I, assembly factor 6(LOC106605374) [Salmo salar]	LOC106605374	NDUFAF6		-2.85917						3
MSTRG.7776|LOC106602775	ssa04: 25499563-25724542	Stringtie	NLR family CARD domain-containing protein 3-like(LOC106602775) [Salmo salar]	LOC106602775	NLRC3		-2.4834						3
MSTRG.34083|LOC106579918	ssa20: 21430591-21573018	Stringtie	nuclear receptor corepressor 2(LOC106579918) [Salmo salar]	LOC106579918	NCOR2				-1.78406				3
MSTRG.32642|LOC106578380	ssa19: 7981622-8016739	Stringtie	phosphatidylinositol 5-phosphate 4-kinase type-2 alpha(LOC106578380) [Salmo salar]	LOC106578380	PIP4K2A		-1.96489						3
MSTRG.10528|LOC106606096	ssa05: 79778146-79813772	Stringtie	pleckstrin homology domain-containing family O member 1(LOC106606096) [Salmo salar]	LOC106606096	PLEKHO1							2.30953	3
MSTRG.40425|LOC106595038	ssa26: 49354795-49647727	Stringtie	probable E3 ubiquitin-protein ligase HERC1(LOC106595038) [Salmo salar]	LOC106595038	HERC1		-1.23787						3
MSTRG.38502|LOC106585301	ssa24: 27340411-27367868	Stringtie	prolactin receptor-like(LOC106585301) [Salmo salar]	LOC106585301	PRLR		-1.16764						3
MSTRG.16150|LOC100380713	ssa09: 121652780-121742887	Stringtie	TRPM8 channel-associated factor homolog(LOC100380713) [Salmo salar]	LOC100380713	TCAF1				1.6164				3
MSTRG.10272|LOC106576951	ssa05: 72072778-72080789	Stringtie	tumor necrosis factor receptor superfamily member 5-like(LOC106576951) [Salmo salar]	LOC106576951	CD40						-1.06572		3
MSTRG.16354|LOC106612809	ssa09: 129998108-130013408	Stringtie	uncharacterized LOC106612809(LOC106612809) [Salmo salar]	LOC106612809	--			-1.03666					3
MSTRG.10872|LOC123743541	ssa06: 2977147-2986333	Stringtie	uncharacterized LOC123743541(LOC123743541) [Salmo salar]	LOC123743541	--			4.31213					3
MSTRG.38812|LOC106585976	ssa24: 46671316-46916077	Stringtie	AT-rich interactive domain-containing protein 3A-like(LOC106585976) [Salmo salar]	LOC106585976	ERLEC1		-1.26339						3
MSTRG.3468	ssa02: 33729640-33748732	BLASTx	BMP-binding endothelial regulator protein [Mus musculus]		BMPER			-23.6335					3
MSTRG.38003|LOC106584907	ssa24: 1936413-1990002	Stringtie	coiled-coil domain-containing protein 60 [Salmo salar]	ccdc60	CCDC60				-7.89127				3
LOC106589263|LOC106589263	ssa28: 517298-581590	Stringtie	PH and SEC7 domain-containing protein 1(LOC106589263) [Salmo salar]	LOC106589263	PSD		-3.02236	-2.90268					3
MSTRG.6511|LOC106601591	ssa03: 72792343-72798964	Stringtie	sesquipedalian-1-like [Salmo salar]	pheta1	PHETA1				-1.28107				3
LOC123723868|LOC123723868	ssa28: 470413-517338	Stringtie	uncharacterized LOC123723868 [Salmo salar]	LOC123723868	--		-3.71494						3
MSTRG.30051|LOC123728174	ssa17: 22915894-22973141	Stringtie	uncharacterized LOC123728174 [Salmo salar]	LOC123728174	--		-1.42331						3
MSTRG.13098	ssa07: 26525689-26533257	Stringtie	Uncharacterized LOC123743761 [Salmo salar]	LOC123743761	--				-1.28234				3
MSTRG.22773|LOC106566698	ssa13: 26129955-26134346	Stringtie|BLASTx	B-cell receptor CD22-like(LOC106566698) [Salmo salar]	LOC106566698	CD22				-5.97846				3
MSTRG.22067|ikbke	ssa12: 82738152-82811894	Stringtie|BLASTx	inhibitor of nuclear factor kappa B kinase subunit epsilon(ikbke) [Salmo salar]	ikbke	IKBKE			4.55026					3
MSTRG.22485	ssa13: 9893463-9900770	Stringtie|BLASTx	matrix metalloproteinase-9-like(LOC106566399) [Salmo salar]	LOC106566399	MMP9							1.85103	3
MSTRG.47441|LOC106601298	NW_025550950.1: 156036-235551	Stringtie|BLASTx	uncharacterized LOC106601298(LOC106601298) [Salmo salar]	LOC106601298	NLRC3			7.27136					3
MSTRG.34349|LOC106580501	ssa20: 35180077-35227683	Stringtie|BLASTx	rho GTPase-activating protein 25(LOC106580501) [Salmo salar]	LOC106580501	CDS2				-1.22347				3
MSTRG.44209|ptpro	NW_025548188.1: 114319-258244	Stringtie|BLASTx	protein tyrosine phosphatase receptor type O(ptpro) [Salmo salar]	ptpro	PTPRO				-1.87706				3
MSTRG.21848|LOC106565666	ssa12: 67387159-67412862	Stringtie|BLASTx	tripartite motif-containing protein 16-like protein(LOC106565666) [Salmo salar]	LOC106565666	STRIP1			1.39725					3
MSTRG.833|LOC123743160	ssa01: 50132123-50168174	Stringtie|BLASTx	uncharacterized LOC123743160(LOC123743160) [Salmo salar]	LOC123743160	--				-7.90308				3
MSTRG.38423|LOC106585486	ssa24: 24338443-24373142	Stringtie|BLASTx	titin homolog(LOC106585486) [Salmo salar]	LOC106585486	KIAA1671			13.3505					3
MSTRG.2956|LOC106596708	ssa02: 15803376-15818747	Stringtie|BLASTx	lethal(3)malignant brain tumor-like protein 4(LOC106596708) [Salmo salar]	LOC106596708	L3MBTL3	24.2435							4
MSTRG.34760|LOC106580937	ssa20: 58425887-58468092	Stringtie	alpha-2-macroglobulin(LOC106580937) [Salmo salar]	LOC106580937	A2M	6.07956							4
MSTRG.13098|LOC123743761	ssa07: 26525689-26533257	Stringtie	Uncharacterized LOC123743761 [Salmo salar]	LOC123743761	--	4.61358			4.15377				4
MSTRG.36761	ssa22: 41076902-41084543	BLASTn	plasma membrane calcium-transporting ATPase 1 (LOC110528364), transcript variant X5, mRNA [Oncorhynchus mykiss]		ATP2B1	4.4916							4
MSTRG.43379|LOC106593976	NW_025547656.1: 121490-211024	Stringtie|BLASTx	protein flightless-1 homolog(LOC106593976) [Salmo salar]	LOC106593976	FLII	3.90149	-3.94387						4
MSTRG.1231	ssa01: 80883442-80912118	BLASTx	CDP-diacylglycerol--glycerol-3-phosphate 3-phosphatidyltransferase, mitochondrial [Bos taurus]		PGS1	3.34023							4
MSTRG.15365|pdzd11	ssa09: 70209018-70221018	Stringtie|BLASTx	PDZ domain containing 11(pdzd11) [Salmo salar]	pdzd11	PDZD11	2.56829			3.52178				4
MSTRG.428|LOC106583053	ssa01: 25182394-25202797	Stringtie|BLASTx	cdc42 effector protein 3-like(LOC106583053) [Salmo salar]	LOC106583053	GCHFR	2.54097							4
MSTRG.35979|LOC106582512	ssa21: 53782262-53822760	Stringtie	desmin(LOC106582512) [Salmo salar]	LOC106582512	DES	2.35818							4
MSTRG.17763|si:ch211-272n13.3	ssa10: 67249673-67414568	Stringtie	ankyrin repeat domain-containing protein 26(si:ch211-272n13.3) [Salmo salar]	si:ch211-272n13.3	ANKRD26	1.68673							4
MSTRG.8107|LOC106603114	ssa04: 42001318-42013179	BLASTx	LRRN4 C-terminal-like protein [Homo sapiens]		LRRN4CL	1.25048							4
MSTRG.39668|LOC106587073	ssa26: 8236761-8243584	Stringtie	transmembrane protein 208(LOC106587073) [Salmo salar]	LOC106587073	TMEM208	1.20332							4
MSTRG.42180|LOC106590198	ssa29: 14730687-14752024	Stringtie	E3 ubiquitin/ISG15 ligase TRIM25-like(LOC106590198) [Salmo salar]	LOC106590198	TRIM25	1.16164	1.36187						4
MSTRG.30559	ssa17: 53230589-53231600	BLASTx	Achaete-scute homolog 5 [Mus musculus]		ASCL5	1.01463	1.41556	1.77537	1.43032	1.24456	2.24793		4
MSTRG.40157|LOC106587597	ssa26: 34151534-34189533	Stringtie|BLASTx	aggrecan core protein-like(LOC106587597) [Salmo salar]	LOC106587597	ACAN	-1.00527							4
MSTRG.27811|LOC106572685	ssa15: 94850209-94956304	Stringtie	rho guanine nucleotide exchange factor 25 [Salmo salar]	arhgef25	ARHGEF25	-1.00535							4
MSTRG.3716	ssa02: 45021379-45029182	BLASTx	Inactive serine protease 35 [Mus musculus]		PRSS35	-1.00861							4
MSTRG.38025	ssa24: 4189445-4202259	BLASTx	Transposable element Tcb1 transposase [Caenorhabditis briggsae]		--	-1.01097			1.0601				4
MSTRG.32715|pcolce2b	ssa19: 12350758-12365119	Stringtie|BLASTx	procollagen C-endopeptidase enhancer 2b(pcolce2b) [Salmo salar]	pcolce2b	PCOLCE2	-1.01189							4
LOC106600623|LOC106600623	ssa03: 47126024-47186536	Stringtie	EMILIN-3-like(LOC106600623) [Salmo salar]	LOC106600623	EMILIN3	-1.01811							4
MSTRG.36894|LOC106583641	ssa22: 47759149-47799487	Stringtie	carbohydrate sulfotransferase 11(LOC106583641) [Salmo salar]	LOC106583641	CHST11	-1.0241							4
MSTRG.18416|LOC106561516	ssa10: 110535377-110554666	Stringtie	leucine-rich repeat neuronal protein 3 [Salmo salar]	lrrn3	LRRN3	-1.03126							4
MSTRG.32710|trpc1	ssa19: 12273314-12350109	Stringtie	transient receptor potential cation channel, subfamily C, member 1(trpc1) [Salmo salar]	trpc1	TRPC1	-1.03289							4
LOC106562020|LOC106562020	ssa01: 128404449-128444388	Stringtie	neuronal tyrosine-phosphorylated phosphoinositide-3-kinase adapter 1(LOC106562020) [Salmo salar]	LOC106562020	NYAP1	-1.03705							4
MSTRG.45230|LOC106597471	NW_025548782.1: 390882-400753	Stringtie	tripartite motif-containing protein 16-like(LOC106597471) [Salmo salar]	LOC106597471	TRIM16	-1.04147							4
MSTRG.26851	ssa15: 40158888-40222612	BLASTx	Adhesion G-protein coupled receptor G6 [Danio rerio]		MCM3	-1.04413							4
MSTRG.22055|LOC106565729	ssa12: 81684529-81772044	Stringtie	neural cell adhesion molecule L1-like protein(LOC106565729) [Salmo salar]	LOC106565729	CHL1	-1.05062							4
MSTRG.21206|LOC106564992	ssa12: 32861133-32865218	Stringtie	uncharacterized protein C17orf67 homolog(LOC106564992) [Salmo salar]	LOC106564992	--	-1.05457							4
MSTRG.28520|LOC106573697	ssa16: 34131357-34147058	Stringtie	WAP four-disulfide core domain protein 1(LOC106573697) [Salmo salar]	LOC106573697	WFDC1	-1.05509							4
MSTRG.1260|c1qtnf1	ssa01: 82140954-82184840	Stringtie|BLASTx	C1q and TNF related 1(c1qtnf1) [Salmo salar]	c1qtnf1	C1QTNF1	-1.06168							4
MSTRG.19200|LOC106562525	ssa11: 34086983-34121550	Stringtie|BLASTx	aggrecan core protein(LOC106562525) [Salmo salar]	LOC106562525	ACAN	-1.06801							4
MSTRG.29398|LOC106597797	ssa16: 79727884-79753756	Stringtie	collagen alpha-2(V) chain-like(LOC106597797) [Salmo salar]	LOC106597797	PRKN	-1.06873							4
MSTRG.29861	ssa17: 14335872-14342119	No BLAST hit	--		--	-1.07							4
MSTRG.21607|zgc:113307	ssa12: 55825893-55838936	Stringtie	uncharacterized LOC106565325 [Salmo salar]	LOC106565325	--	-1.07516							4
MSTRG.34701|LOC106580855	ssa20: 55585659-55677229	Stringtie|BLASTx	SPARC-related modular calcium-binding protein 1(LOC106580855) [Salmo salar]	LOC106580855	SMOC1	-1.07925							4
MSTRG.33797	ssa20: 2454619-2556710	BLASTx	Collagen alpha-1(XXVII) chain B [Danio rerio]		COL27A1	-1.07975							4
MSTRG.24111|LOC106568391	ssa13: 100352822-100367797	Stringtie	anthrax toxin receptor 2(LOC106568391) [Salmo salar]	LOC106568391	ANTXR2	-1.08203							4
MSTRG.20636|LOC106592099	ssa12: 11129202-11202015	Stringtie	collagen alpha-1(XI) chain-like(LOC106592099) [Salmo salar]	LOC106592099	COL11A1	-1.08278							4
MSTRG.44033	NW_025548112.1: 269-566683	BLASTx	NACHT, LRR and PYD domains-containing protein 12 [Mus musculus]		NLRP12	-1.08296							4
MSTRG.36956	ssa22: 52006031-52033687	BLASTx	Protein APCDD1 [Xenopus laevis]		APCDD1	-1.09627							4
MSTRG.20987|LOC106564554	ssa12: 23769379-23781889	Stringtie|BLASTx	transcription factor SOX-10-like(LOC106564554) [Salmo salar]	LOC106564554	SOX10	-1.10262							4
MSTRG.27800|LOC106572671	ssa15: 94376426-94384015	Stringtie	indian hedgehog protein-like(LOC106572671) [Salmo salar]	LOC106572671	IHH	-1.10292						1.03074	4
MSTRG.32781	ssa19: 18849707-18856933	BLASTx	BMP and activin membrane-bound inhibitor homolog [Rattus norvegicus]		BAMBI	-1.11925							4
LOC106573614|LOC106573614	ssa16: 37493186-37500446	Stringtie	uncharacterized LOC106573614(LOC106573614) [Salmo salar]	LOC106573614	--	-1.12455							4
MSTRG.23150|dhh	ssa13: 42080813-42086849	Stringtie	desert hedgehog signaling molecule(dhh) [Salmo salar]	dhh	DHH	-1.12753							4
MSTRG.36456|wnt4	ssa22: 26535718-26561623	Stringtie|BLASTx	wingless-type MMTV integration site family, member 4(wnt4) [Salmo salar]	wnt4	WNT4	-1.1279							4
MSTRG.11374	ssa06: 29128732-29160141	BLASTx	Coiled-coil domain-containing protein 8 [Rattus norvegicus]		CCDC8	-1.13248							4
LOC106583711|LOC106583711	ssa22: 52737626-52776228	Stringtie	calcium/calmodulin-dependent 3',5'-cyclic nucleotide phosphodiesterase 1B-like(LOC106583711) [Salmo salar]	LOC106583711	PDE1B	-1.1374							4
MSTRG.19639|hapln1b	ssa11: 70724680-70760149	Stringtie	hyaluronan and proteoglycan link protein 1b(hapln1b) [Salmo salar]	hapln1b	HAPLN1B	-1.14632							4
MSTRG.34414|LOC106580571	ssa20: 39216497-39224711	Stringtie	chondroitin sulfate N-acetylgalactosaminyltransferase 1(LOC106580571) [Salmo salar]	LOC106580571	CSGALNACT1	-1.14694							4
MSTRG.26219|mamdc2a	ssa15: 2053937-2092253	Stringtie	MAM domain containing 2a(mamdc2a) [Salmo salar]	mamdc2a	MAMDC2	-1.1587							4
MSTRG.1162|loxl4	ssa01: 76553776-76616190	Stringtie	lysyl oxidase-like 4(loxl4) [Salmo salar]	loxl4	LOXL4	-1.16206							4
MSTRG.39661|LOC106587061	ssa26: 7331138-7358398	Stringtie	ankyrin repeat and BTB/POZ domain-containing protein 2 [Salmo salar]	abtb2	ABTB2	-1.20134			1.26023		1.07907		4
MSTRG.22999|emilin3a	ssa13: 36039529-36044052	Stringtie	elastin microfibril interfacer 3a(emilin3a) [Salmo salar]	emilin3a	EMILIN3	-1.20228			1.7941		1.28755	1.60622	4
gabrb3|gabrb3	ssa16: 58629339-58684692	Stringtie	gamma-aminobutyric acid type A receptor subunit beta3(gabrb3) [Salmo salar]	gabrb3	GABRB3	-1.2151							4
cntnap3|cntnap3	ssa13: 99224292-99411154	Stringtie	contactin associated protein family member 3(cntnap3) [Salmo salar]	cntnap3	CNTNAP3	-1.22081							4
MSTRG.41173	ssa27: 31608679-31612239	BLASTx	Peroxisomal ATPase PEX1 [Cricetulus griseus]		PEX1	-1.22582							4
LOC106563076|LOC106563076	ssa11: 70681712-70699238	Stringtie	EGF-like repeat and discoidin I-like domain-containing protein 3(LOC106563076) [Salmo salar]	LOC106563076	EDIL3	-1.26311							4
MSTRG.19200	ssa11: 34086983-34121550	Stringtie|BLASTx	aggrecan core protein(LOC106562525) [Salmo salar]	LOC106562525	ACAN	-1.26971							4
LOC106574883|LOC106574883	NW_025547995.1: 26066-70896	Stringtie	collagen alpha-2(V) chain(LOC106574883) [Salmo salar]	LOC106574883	COL2A1	-1.28603							4
MSTRG.31670|LOC106577236	ssa18: 31747728-31800283	Stringtie|BLASTx	lysyl oxidase homolog 4-like(LOC106577236) [Salmo salar]	LOC106577236	LOXL4	-1.30049							4
MSTRG.35306	ssa21: 223016-606668	BLASTx	E3 ubiquitin-protein ligase MYCBP2 [Danio rerio]		MYCBP2	-1.30986							4
MSTRG.2614	ssa01: 171615232-171636690	Stringtie|BLASTx	fukutin(fktn) [Salmo salar]	fktn	FKTN	-1.31858							4
MSTRG.22492|LOC106566415	ssa13: 10369083-10619365	Stringtie	copine-5-like(LOC106566415) [Salmo salar]	LOC106566415	CPNE5	-1.32641							4
plcxd3|plcxd3	ssa24: 5513554-5540977	Stringtie	phosphatidylinositol-specific phospholipase C, X domain containing 3(plcxd3) [Salmo salar]	plcxd3	PLCXD3	-1.34099							4
MSTRG.5616|angl1	ssa03: 35732705-35770262	Stringtie	Angiopoietin-related protein 1(angl1) [Salmo salar]	angl1	ANGL1	-1.34284							4
MSTRG.32140|LOC106577836	ssa18: 68970434-68990059	Stringtie	coagulation factor XIII A chain(LOC106577836) [Salmo salar]	LOC106577836	F13A1	-1.39354							4
MSTRG.18034|has3	ssa10: 84973628-84988519	Stringtie	hyaluronan synthase 3(has3) [Salmo salar]	has3	HAS3	-1.43065			1.09174				4
MSTRG.34337	ssa20: 34256523-34262433	BLASTn	uncharacterized LOC124035249 [Oncorhynchus gorbuscha]		--	-1.45728							4
MSTRG.22493	ssa13: 10621431-10625984	BLASTx	Transposable element Tc1 transposase [Caenorhabditis elegans]		--	-1.49172							4
MSTRG.44046	NW_025548112.1: 348649-422680	BLASTx	E3 ubiquitin/ISG15 ligase TRIM25 [Mus musculus]		TRIM25	-1.51362							4
MSTRG.17520	ssa10: 46471942-46479238	BLASTx	Thrombopoietin receptor [Homo sapiens]		MPL	-1.51819							4
MSTRG.46718	NW_025549990.1: 14547-20497	BLASTn	glycine-rich cell wall structural protein 1.8 (LOC106606883), transcript variant X39, mRNA [Salmo salar]	LOC106606883	--	-1.52978							4
MSTRG.13314	ssa07: 38510588-38512888	BLASTx	RNA-directed DNA polymerase from mobile element jockey [Drosophila melanogaster]		--	-1.62566							4
MSTRG.44301	NW_025548250.1: 182294-186854	BLASTx	FAD-linked sulfhydryl oxidase ALR [Mus musculus]		GFER	-1.73071							4
MSTRG.22925	ssa13: 32664904-32703716	BLASTx	Pleckstrin homology domain-containing family G member 4B [Homo sapiens]		PLEKHG4B	-1.77839							4
MSTRG.11374|LOC106606883	ssa06: 29128732-29160141	BLASTx	Coiled-coil domain-containing protein 8 [Rattus norvegicus]		CCDC8	-1.78618							4
MSTRG.45334	NW_025548792.1: 320576-323009	BLASTx	Butyrophilin subfamily 3 member A1 [Homo sapiens]		BTN3A1	-1.78671							4
LOC106568205|LOC106568205	ssa13: 91432029-91459474	Stringtie	polypeptide N-acetylgalactosaminyltransferase 9-like(LOC106568205) [Salmo salar]	LOC106568205	LOC106585080	-1.89424							4
MSTRG.18751|LOC106561895	ssa11: 4553426-4559614	Stringtie|BLASTx	collagen alpha-1(X) chain-like(LOC106561895) [Salmo salar]	LOC106561895	COL10A1	-1.94979							4
MSTRG.38276	ssa24: 17046756-17066879	BLASTn	trichohyalin [Salmo salar]	tchh	TCHH	-1.95606							4
MSTRG.4440|LOC106591005	ssa02: 73871308-73873855	Stringtie	GTPase IMAP family member 7-like(LOC106591005) [Salmo salar]	LOC106591005	GIMAP7	-1.96179							4
MSTRG.46703|LOC106587613	NW_025549953.1: 1592-6301	Stringtie|BLASTx	brevican core protein(LOC106587613) [Salmo salar]	LOC106587613	ACAN	-1.96513							4
MSTRG.35917|LOC106582433	ssa21: 47613848-47782922	Stringtie|BLASTx	contactin-associated protein-like 5(LOC106582433) [Salmo salar]	LOC106582433	CNTNAP5	-2.17289	-1.10066						4
MSTRG.7864|LOC106602834	ssa04: 31823747-31852523	Stringtie	septin-5-like(LOC106602834) [Salmo salar]	LOC106602834	SEPTIN5	-2.19192							4
LOC106612713|LOC106612713	ssa09: 118008122-118023828	Stringtie	HHIP-like protein 1(LOC106612713) [Salmo salar]	LOC106612713	HHIPL1	-2.31245							4
MSTRG.40943	ssa27: 20268376-20281478	BLASTx	Nuclear receptor subfamily 1 group D member 2 [Homo sapiens]		NR1D2	-2.4655							4
MSTRG.45123	NW_025548723.1: 132329-137274	BLASTx	Cytolytic toxin-alpha [Scorpaena plumieri]		--	-2.5659							4
MSTRG.44023	NW_025548130.1: 2526-4102	BLASTx	Phosphopentomutase [Pongo abelii]		PGM2	-2.75458							4
MSTRG.33510|LOC106579467	ssa19: 69832319-69903914	Stringtie|BLASTx	MICOS complex subunit MIC27-like(LOC106579467) [Salmo salar]	LOC106579467	ACOT9	-3.11566							4
MSTRG.22790	ssa13: 26439883-26461819	BLASTx	mRNA-decapping enzyme-like protein [Arabidopsis thaliana]		DCP1A	-3.1639							4
MSTRG.23068|LOC106567148	ssa13: 38462361-38634646	Stringtie	basement membrane-specific heparan sulfate proteoglycan core protein-like(LOC106567148) [Salmo salar]	LOC106567148	HSPG2	-3.47595				-3.69619		-4.05173	4
MSTRG.45513	NW_025548882.1: 80082-81359	BLASTx	Zinc finger protein 180 [Homo sapiens]		ZNF180	-3.65535							4
MSTRG.43213	NW_025547613.1: 220078-225704	BLASTx	Zinc finger protein 180 [Homo sapiens]		ZNF180	-3.72771			2.49598				4
MSTRG.47054|LOC106590830	NW_025550565.1: 10971-36863	Stringtie|BLASTx	von Willebrand factor A domain-containing protein 7-like(LOC106590830) [Salmo salar]	LOC106590830	VWA7	-7.79146							4
MSTRG.14152	ssa08: 17710651-17712117	BLASTn	dolichyldiphosphatase 1 [Salvelinus fontinalis]		DOLPP1	-25.7228							4
MSTRG.40993|cckb	ssa27: 23209300-23214666	Stringtie	cholecystokinin b(cckb) [Salmo salar]	cckb	CCKB				5.17228	3.16539	3.00806	3.74392	4
MSTRG.25994|LOC106570512	ssa14: 87408051-87444644	Stringtie	collagen alpha-2 (IX) chain-like [Salmo salar]	ix	COL9A2				2.95414	2.46066	2.94463	3.517	4
MSTRG.25885|si:ch211-133n4.6	ssa14: 82060005-82072308	Stringtie	Formin-like protein 2 [Salmo salar]	fmnl2	FMNL2				1.68651	2.1843	2.6506	2.22919	4
MSTRG.22761|LOC106566709	ssa13: 25883263-25912134	Stringtie	collagen alpha-1(II) chain-like(LOC106566709) [Salmo salar]	LOC106566709	COL2A1				2.0859	1.60964	2.14865	2.73017	4
MSTRG.33571|LOC106579545	ssa19: 72079426-72119946	Stringtie	carboxypeptidase A6 [Salmo salar]	cpa6	CPA6			1.32564	2.31409	1.71621	1.61864		4
MSTRG.36748|LOC100286414	ssa22: 39834790-39839783	Stringtie	Fibromodulin [Salmo salar]	fmod	FMOD				3.8083	2.8456	4.16553	2.74741	4
MSTRG.40008|LOC106587515	ssa26: 25199942-25229388	Stringtie	mitochondrial glutamate carrier 1 [Salmo salar]	slc25a22	SLC25A22				2.72609	1.63808		2.31324	4
MSTRG.574	ssa01: 31343115-31348426	BLASTx	Bis(5'-adenosyl)-triphosphatase enpp4 [Danio rerio]		ENPP4				-2.83649	-4.53401			4
MSTRG.33378|LOC106579141	ssa19: 60782239-60829428	Stringtie|BLASTx	zinc finger protein 91(LOC106579141) [Salmo salar]	LOC106579141	ZNF91					2.84553			4
MSTRG.12839	ssa07: 15427264-15429025	BLASTn	uncharacterized LOC118391928 [Oncorhynchus keta]		--					1.27019			4
MSTRG.2843|LOC106606081	ssa02: 10899932-10927025	Stringtie|BLASTx	tenascin-R-like(LOC106606081) [Salmo salar]	LOC106606081	TNC			1.50788	1.74203	2.23597	2.80449	2.56203	4
MSTRG.41002	ssa27: 23559718-23566155	BLASTn	matrilin 1 [Salmo salar]	matn1	MATN1				4.00477	2.65168	3.2071	3.52453	4
MSTRG.693	ssa01: 38687223-38709628	BLASTx	AT-rich interactive domain-containing protein 4A [Homo sapiens]		ARID4A					-8.18024			4
MSTRG.31152	ssa17: 85394155-85546851	BLASTx	Neuronal cell adhesion molecule [Rattus norvegicus]		NRCAM					-24.5969			4
si:ch211-267e7.3|si:ch211-267e7.3	ssa14: 14775999-14790258	Stringtie	ADAMTS-like protein 2 [Salmo salar]	adamtsl2	ADAMTSL2		1.1807	1.89982	2.16166	1.64994	2.18853	1.79052	4
MSTRG.25888	ssa14: 82246528-82255020	BLASTx	CCN family member 5 [Mus musculus]		CCN5					-1.2443			4
MSTRG.20580|LOC106564110	ssa12: 8593366-8719942	Stringtie|BLASTx	uncharacterized LOC106564110(LOC106564110) [Salmo salar]	LOC106564110	MSLN					6.88338			4
MSTRG.10647	ssa05: 85446730-85495549	BLASTx	Histone-lysine N-methyltransferase NSD2 [Mus musculus]		NSD2					-2.26165			4
MSTRG.6699|LOC106606600	ssa03: 81080795-81220427	Stringtie	trinucleotide repeat-containing gene 6C protein-like(LOC106606600) [Salmo salar]	LOC106606600	TNRC6C					2.18073			4
MSTRG.41003|matn1	ssa27: 23559719-23576298	BLASTx	Cartilage matrix protein [Gallus gallus]		MATN1				3.79921	2.55819	3.11816	2.76387	4
MSTRG.41387	ssa28: 2271650-2291537	BLASTn	delta(3,5)-Delta(2,4)-dienoyl-CoA isomerase, mitochondrial-like (LOC127630196), transcript variant X2, mRNA [Xyrauchen texanus]		ECH1					-3.27865			4
MSTRG.22005|LOC106565789	ssa12: 78677616-78771652	Stringtie	extracellular sulfatase Sulf-2-like [Salmo salar]	sulf2	SULF2				3.69285	2.33552			4
LOC106584650|LOC106584650	ssa23: 42381309-42397425	Stringtie	retinaldehyde-binding protein 1(LOC106584650) [Salmo salar]	LOC106584650	RLBP1							1.36061	4
MSTRG.42556	ssa29: 41897655-41932096	BLASTx	Protein-cysteine N-palmitoyltransferase HHAT-like protein [Homo sapiens]		HHATL				7.36237				4
MSTRG.17823	ssa10: 73405003-73415056	BLASTn	aggrecan core protein-like (LOC109866854), mRNA [Oncorhynchus kisutch]		ACAN							1.31622	4
MSTRG.38805	ssa24: 47641413-47641903	BLASTn	coiled-coil domain-containing protein 71-like [Salvelinus fontinalis]		CCDC71		-4.69135						4
MSTRG.19222	ssa11: 34891459-34897792	BLASTn	uncharacterized LOC106562634 (LOC106562634), mRNA [Salmo salar]	LOC106562634	--							6.12314	4
MSTRG.24396	ssa14: 7723746-7729539	BLASTn	uncharacterized LOC106568694 [Salmo salar]	LOC106568694	--		-2.95256						4
MSTRG.42920	NW_025547388.1: 95784-98312	BLASTn	uncharacterized LOC123731804 (LOC123731804), mRNA [Salmo salar]	LOC123731804	--			-2.67169					4
MSTRG.43254	NW_025547624.1: 96266-98341	BLASTn	uncharacterized LOC127919256 (LOC127919256), transcript variant X7, ncRNA [Oncorhynchus keta]		--		-3.09613						4
MSTRG.46003	NW_025549332.1: 17930-21599	BLASTn	uncharacterized LOC129842711 [Salvelinus fontinalis]		--		-7.27295						4
MSTRG.18852	ssa11: 13545631-13547462	BLASTn	UPF0600 protein C5orf51 homolog [Salmo trutta]		RIMOC1		-1.37362						4
MSTRG.41148	ssa27: 30280895-30295965	BLASTx	26S proteasome complex subunit SEM1 [Homo sapiens]		SEM1				-25.6415				4
MSTRG.33575	ssa19: 72222564-72245587	BLASTx	5-oxoprolinase [Homo sapiens]		OPLAH		-10.3276						4
MSTRG.18643	ssa10: 122412662-122529442	BLASTx	Anoctamin-3 [Homo sapiens]		ANO3				4.04446				4
MSTRG.37203	ssa23: 2942347-2967459	BLASTx	Ataxin-2-like protein [Homo sapiens]		ATXN2L						-1.20513		4
MSTRG.5401	ssa03: 22648425-22680832	BLASTx	Brefeldin A-inhibited guanine nucleotide-exchange protein 2 [Mus musculus]		ARFGEF2				9.60533				4
MSTRG.18087	ssa10: 87757208-87795106	BLASTx	Capping protein, Arp2/3 and myosin-I linker protein 3 [Mus musculus]		CARMIL3			3.25027	2.20262				4
MSTRG.41003	ssa27: 23559719-23576298	BLASTx	Cartilage matrix protein [Gallus gallus]		MATN1				5.24013		4.82504	5.22645	4
MSTRG.33746	ssa19: 86842972-86987925	BLASTx	Cytoplasmic protein NCK1 [Homo sapiens]		NCK1							1.66798	4
MSTRG.31358	ssa18: 12364865-12477149	BLASTx	E3 ubiquitin-protein ligase parkin [Homo sapiens]		PRKN		-2.35106						4
MSTRG.29363	ssa16: 78917582-78950598	BLASTx	Fibronectin [Canis lupus familiaris]		FNDC8							1.02636	4
MSTRG.16025|si:ch211-195m9.3	ssa09: 115240987-115259940	BLASTx	Galaxin [Acropora millepora]		--							4.18273	4
MSTRG.24311|hdhd2	ssa13: 113795992-113827048	BLASTx	Haloacid dehalogenase-like hydrolase domain-containing protein 2 [Danio rerio]		HDHD2							-1.15891	4
MSTRG.10134	ssa05: 67769585-67834528	BLASTx	Hemicentin-1 [Homo sapiens]		HMCN1				1.57892				4
MSTRG.15272|LOC106611621	ssa09: 64751338-64767650	BLASTx	Homeobox protein HMX1 [Mus musculus]		HMX1							1.07278	4
MSTRG.34888	ssa20: 65482732-65501714	BLASTx	Hypermethylated in cancer 1 protein [Gallus gallus]		HIC1							25.019	4
MSTRG.27429|lamb2	ssa15: 76345661-76447886	BLASTx	Laminin subunit beta-2 [Mus musculus]		LAMB2		-1.08332						4
MSTRG.39183	ssa25: 28294834-28395161	BLASTx	Leucine-rich repeat and calponin homology domain-containing protein 1 [Mus musculus]		LRCH1				1.12919				4
MSTRG.42422	ssa29: 27999318-28018128	BLASTx	Lipocalin [Rhinella marina]		LCN1						-4.04881		4
MSTRG.24215	ssa13: 106479264-106521483	BLASTx	Lysosome membrane protein 2 [Homo sapiens]		SCARB2		-1.79152						4
MSTRG.33667	ssa19: 78073304-78146851	BLASTx	Myosin-7 [Homo sapiens]		MYH7			4.02965	3.7964				4
MSTRG.41894	ssa28: 29780253-29819649	BLASTx	Na(+)/H(+) exchange regulatory cofactor NHE-RF1 [Homo sapiens]		SLC9A3R1			1.83971					4
MSTRG.44695	NW_025548436.1: 6203-9128	BLASTx	Neoverrucotoxin subunit beta [Synanceia verrucosa]		--			6.69488					4
MSTRG.24944	ssa14: 32921606-32952165	BLASTx	NPC intracellular cholesterol transporter 1 [Homo sapiens]		NPC1							7.64429	4
MSTRG.24557	ssa14: 12593572-12631258	BLASTx	Occludin [Potorous tridactylus]		OCLN				7.05792				4
MSTRG.14628	ssa09: 17496399-17511593	BLASTx	Pre-mRNA-splicing factor syf2 [Danio rerio]		SYF2						1.68591		4
MSTRG.27766	ssa15: 92922936-92938606	BLASTx	Probable coatomer subunit zeta [Schizosaccharomyces pombe 972h-]		COPZ1						-3.49707		4
MSTRG.28495|LOC106573718	ssa16: 31870143-31948873	BLASTx	Protein NLRC5 [Ictalurus punctatus]		NLRC5				1.97016				4
MSTRG.3651	ssa02: 41496856-41512486	BLASTx	Protein NYNRIN [Homo sapiens]		NYNRIN		-6.9062						4
MSTRG.16165	ssa09: 122077778-122089885	BLASTx	Ribosome biogenesis protein NOP53 [Mus musculus]		NOP53		-7.61198						4
MSTRG.8282	ssa04: 50489585-50497210	BLASTx	RING finger protein 214 [Mus musculus]		RNF214		-4.86803						4
MSTRG.40033	ssa26: 26834375-26854863	BLASTx	Signal peptide, CUB and EGF-like domain-containing protein 2 [Danio rerio]		SCUBE2							1.16283	4
MSTRG.16549	ssa09: 143725682-143727612	BLASTx	Sodium-dependent dopamine transporter [Mus musculus]		SLC6A3			-3.42203					4
MSTRG.9357|LOC106604594	ssa05: 30550974-30564945	BLASTx	T-cell leukemia homeobox protein 3 [Mus musculus]		TLX3						1.04117		4
MSTRG.15297	ssa09: 66311044-66340672	BLASTx	TBC1 domain family member 2A [Rattus norvegicus]		TBC1D2			4.16892					4
MSTRG.10573	ssa05: 81933721-81960719	BLASTx	Tenascin [Sus scrofa]		TNC						2.72221		4
MSTRG.37	ssa01: 2342196-2343162	BLASTx	Thrombin-like enzyme bhalternin [Bothrops alternatus]		--				2.12247				4
MSTRG.33478	ssa19: 66595597-66723634	BLASTx	Transient receptor potential cation channel subfamily M member 4 [Mus musculus]		TRPM4			1.49138			-1.44596		4
MSTRG.44048	NW_025548112.1: 458360-509838	BLASTx	Tripartite motif-containing protein 16 [Homo sapiens]		TRIM16		-1.11452						4
MSTRG.45610	NW_025548925.1: 557038-595250	BLASTx	Tripartite motif-containing protein 16 [Mus musculus]		TRIM16						3.52732		4
MSTRG.44849	NW_025548510.1: 104839-105365	BLASTx	Zinc finger and SCAN domain-containing protein 2 [Mus musculus]		ZSCAN2				3.08584				4
MSTRG.15681	ssa09: 86469422-86501198	BLASTx	Zinc finger protein 185 [Mus musculus]		ZNF185			-4.4545					4
MSTRG.36109|abraa	ssa22: 4415492-4434076	Stringtie	actin binding Rho activating protein a(abraa) [Salmo salar]	abraa	ABRA				1.94532				4
MSTRG.17507|angptl3	ssa10: 45245958-45253860	Stringtie	angiopoietin-like 3(angptl3) [Salmo salar]	angptl3	ANGPTL3						1.67615		4
MSTRG.15046|LOC106570739	ssa09: 44960555-44999307	Stringtie	beta-3 adrenergic receptor-like(LOC106570739) [Salmo salar]	LOC106570739	ADRB3			3.03926					4
LOC106590408|LOC106590408	ssa29: 25058350-25115352	Stringtie	carboxypeptidase A6(LOC106590408) [Salmo salar]	LOC106590408	CPA6				1.42481				4
MSTRG.45098|LOC123733232	NW_025548713.1: 2011-13735	Stringtie	carboxypeptidase M-like(LOC123733232) [Salmo salar]	LOC123733232	CPM				1.24109				4
MSTRG.29393|LOC123727727	ssa16: 79648553-79663177	Stringtie	collagen alpha-1(II) chain-like(LOC123727727) [Salmo salar]	LOC123727727	COL2A1							1.40565	4
MSTRG.27236|LOC100286410	ssa15: 66730070-66759577	Stringtie	collagen alpha-1(II) chain(LOC100286410) [Salmo salar]	LOC100286410	COL2A1				1.99587		2.22177	2.95417	4
MSTRG.13590|LOC106609040	ssa07: 50752732-50777327	Stringtie	collagen alpha-2(I) chain-like(LOC106609040) [Salmo salar]	LOC106609040	COL1A2						1.7976	2.23632	4
MSTRG.29396|LOC106599717	ssa16: 79687471-79727627	Stringtie	collagen alpha-2(V) chain-like(LOC106599717) [Salmo salar]	LOC106599717	COL5A2							1.28374	4
MSTRG.22232|col2a1b	ssa12: 92336705-92423197	Stringtie	collagen, type II, alpha 1b(col2a1b) [Salmo salar]	col2a1b	COL2A1							1.27798	4
MSTRG.41834|col21a1	ssa28: 27474420-27533464	Stringtie	collagen, type XXI, alpha 1(col21a1) [Salmo salar]	col21a1	COL21A1				1.14315				4
MSTRG.1656|col27a1a	ssa01: 121407131-121773617	Stringtie	collagen, type XXVII, alpha 1a(col27a1a) [Salmo salar]	col27a1a	COL27A1							1.09637	4
LOC106582422|LOC106582422	ssa21: 47002839-47154282	Stringtie	contactin-associated protein-like 5(LOC106582422) [Salmo salar]	LOC106582422	CNTNAP5				1.18123				4
MSTRG.5471|LOC106599318	ssa03: 26814841-26825486	Stringtie	cysteine-rich secretory protein LCCL domain-containing 1-like(LOC106599318) [Salmo salar]	LOC106599318	CRISPLD1							1.20356	4
MSTRG.1903|fgf10a	ssa01: 131242833-131261855	Stringtie	fibroblast growth factor 10a(fgf10a) [Salmo salar]	fgf10a	FGF10A						1.1219		4
MSTRG.16286|LOC106612873	ssa09: 127087416-127201362	Stringtie	FRAS1-related extracellular matrix protein 2-like(LOC106612873) [Salmo salar]	LOC106612873	FREM2							1.0645	4
MSTRG.27734|LOC106572624	ssa15: 92101743-92118834	Stringtie	G0/G1 switch protein 2(LOC106572624) [Salmo salar]	LOC106572624	G0S2		-1.61077						4
MSTRG.5380|LOC106599515	ssa03: 20801765-20847582	Stringtie	integrin beta-1-like(LOC106599515) [Salmo salar]	LOC106599515	ITGB1			-1.80887					4
MSTRG.36350|LOC106582936	ssa22: 18172109-18183657	Stringtie	inter-alpha-trypsin inhibitor heavy chain H3-like(LOC106582936) [Salmo salar]	LOC106582936	ITIH3							1.72837	4
MSTRG.33883|iigp1	ssa20: 10135742-10150474	Stringtie	Interferon-inducible GTPase 1(iigp1) [Salmo salar]	iigp1	IIGP1		-3.93095						4
MSTRG.36462|LOC106583114	ssa22: 26898085-26918918	Stringtie	kelch domain-containing protein 8A-like(LOC106583114) [Salmo salar]	LOC106583114	KLHDC8A							1.47248	4
MSTRG.963|LOC106606142	ssa01: 57850835-57932743	Stringtie	LIM domain-binding protein 3-like(LOC106606142) [Salmo salar]	LOC106606142	LDB3				9.80646				4
lrp2b|lrp2b	ssa19: 62762479-62887536	Stringtie	low density lipoprotein receptor-related protein 2b(lrp2b) [Salmo salar]	lrp2b	LRP2			-2.85919					4
MSTRG.22767|LOC106566702	ssa13: 26010883-26023387	Stringtie	methyl-CpG-binding domain protein 5(LOC106566702) [Salmo salar]	LOC106566702	MBD5		-2.731						4
MSTRG.4387|LOC106595636	ssa02: 72283947-72307416	Stringtie	methylthioribose-1-phosphate isomerase(LOC106595636) [Salmo salar]	LOC106595636	MRI1				4.31407				4
MSTRG.4387|LOC106592004	ssa02: 72283947-72307416	Stringtie	methylthioribose-1-phosphate isomerase(LOC106595636) [Salmo salar]	LOC106595636	MRI1				1.77488				4
MSTRG.30189|LOC106575818	ssa17: 28418097-28440483	Stringtie	myosin light chain 3, skeletal muscle isoform(LOC106575818) [Salmo salar]	LOC106575818	--							2.3585	4
LOC106573511|LOC106573511	ssa16: 24483931-24541653	Stringtie	otogelin-like protein(LOC106573511) [Salmo salar]	LOC106573511	OTOGL							3.09104	4
MSTRG.33519|otos	ssa19: 70005069-70007365	Stringtie	otospiralin(otos) [Salmo salar]	otos	OTOS							1.08631	4
MSTRG.40633|LOC106588501	ssa27: 6844729-6853585	Stringtie	piggyBac transposable element-derived protein 4-like(LOC106588501) [Salmo salar]	LOC106588501	PGBD4			-8.81574					4
MSTRG.12711|LOC106608509	ssa07: 6510780-6569043	Stringtie	RNA binding protein, mRNA processing factor(LOC106608509) [Salmo salar]	LOC106608509	RBPMS			-1.61176					4
MSTRG.24901|LOC106569122	ssa14: 30788630-30851376	Stringtie	suppression of tumorigenicity 18 protein(LOC106569122) [Salmo salar]	LOC106569122	ST18				1.36559				4
MSTRG.25545|LOC106569962	ssa14: 64310440-64339769	Stringtie	tapasin-like(LOC106569962) [Salmo salar]	LOC106569962	TAPBP				2.95059				4
LOC106580533|LOC106580533	ssa20: 37395034-37469265	Stringtie	tenascin-like(LOC106580533) [Salmo salar]	LOC106580533	TNC				1.06716		1.0255		4
MSTRG.5874|tmem11	ssa03: 49974509-49995295	Stringtie	transmembrane protein 11(tmem11) [Salmo salar]	tmem11	TMEM11		1.32311						4
MSTRG.11795|LOC106607240	ssa06: 42595764-42605190	Stringtie	transmembrane protein 98(LOC106607240) [Salmo salar]	LOC106607240	TMEM98		-1.02882						4
MSTRG.47079|LOC123739580	NW_025550616.1: 4326-21212	Stringtie	ubiquitin carboxyl-terminal hydrolase isozyme L1-like(LOC123739580) [Salmo salar]	LOC123739580	UCHL1				1.0857				4
MSTRG.1733|LOC123724448	ssa01: 123373900-123376819	Stringtie	uncharacterized LOC123724448(LOC123724448) [Salmo salar]	LOC123724448	--			-7.85199					4
MSTRG.7926|LOC123742443	ssa04: 35679176-35681949	Stringtie	uncharacterized LOC123742443(LOC123742443) [Salmo salar]	LOC123742443	--							8.83398	4
MSTRG.10555|LOC106597668	ssa05: 80887605-81159041	Stringtie	zymogen granule membrane protein 16-like(LOC106605916) [Salmo salar]	LOC106605916	ZG16							6.44435	4
MSTRG.24332|adcy8	ssa14: 2585706-2889722	Stringtie	adenylate cyclase 8 (brain)(adcy8) [Salmo salar]	adcy8	ADCY8		1.0309						4
MSTRG.9586|arsia	ssa05: 39455994-39459698	Stringtie	arylsulfatase family, member Ia(arsia) [Salmo salar]	arsia	TRIM39				1.06402				4
MSTRG.19679|LOC100194600	ssa11: 72271961-72277151	Stringtie	Betaine-homocysteine methyltransferase [Salmo salar]	bhmt	BHMT						1.19658		4
MSTRG.23579|LOC106567672	ssa13: 73925543-74000473	Stringtie	cell surface glycoprotein MUC18-like [Salmo salar]	mcam	MCAM				1.11809				4
MSTRG.5684|LOC106600181	ssa03: 37678454-37686340	Stringtie	chondromodulin(LOC106600181) [Salmo salar]	LOC106600181	CNMD				1.91244		2.28318	2.97893	4
MSTRG.3973|LOC106587572	ssa02: 56902546-56925484	Stringtie	collagen alpha-1 (IX) chain [Salmo salar]	ix	COL9A1				1.71863		1.63611	2.25288	4
MSTRG.41081|LOC106588834	ssa27: 27863817-27888222	Stringtie	collagen alpha-2 (IX) chain-like [Salmo salar]	ix	COL9A2				1.20291			1.9046	4
LOC106592076|LOC106592076	NW_025547997.1: 54-23526	Stringtie	collagen alpha-2 (V) chain [Salmo salar]	v	COL5A2							1.25786	4
MSTRG.22743|LOC106566732	ssa13: 24971756-24997434	Stringtie	collagen alpha-3 (IX) chain-like [Salmo salar]	ix	COL9A3							1.57553	4
MSTRG.27214|LOC106571930	ssa15: 65922887-65945475	Stringtie	collagen alpha-3(IX) chain-like(LOC106571930) [Salmo salar]	LOC106571930	COL9A3				2.159		2.16811	2.56182	4
MSTRG.35519|egfl6	ssa21: 19761927-19788512	Stringtie	EGF-like-domain, multiple 6(egfl6) [Salmo salar]	egfl6	EGFL6				1.29082				4
fgfbp1a|fgfbp1a	ssa05: 26466696-26468182	Stringtie	fibroblast growth factor binding protein 1a(fgfbp1a) [Salmo salar]	fgfbp1a	FGFBP1A				2.11394		2.39552		4
MSTRG.31566|fgfbp3	ssa18: 24140208-24142163	Stringtie	fibroblast growth factor binding protein 3(fgfbp3) [Salmo salar]	fgfbp3	FGFBP3						1.60335		4
MSTRG.15229|LOC106611547	ssa09: 59664210-59666074	Stringtie	fibroblast growth factor-binding protein 2(LOC106611547) [Salmo salar]	LOC106611547	FGF2				2.69938		3.35071	2.99632	4
LOC106571900|LOC106571900	ssa15: 63979618-64023142	Stringtie	fibulin-2-like [Salmo salar]	fbln2	FBLN2							1.46388	4
MSTRG.1368|LOC106610058	ssa01: 89871094-89876749	Stringtie	forkhead box protein L3-like [Salmo salar]	foxl3	FOXL3						1.04668		4
LOC106576347|LOC106576347	ssa02: 22927917-23034979	Stringtie	glutamate receptor ionotropic, kainate 5-like [Salmo salar]	grik5	GRIK5							1.14836	4
MSTRG.30878|LOC106576453	ssa17: 66682024-66705398	Stringtie	leucine-rich repeat protein soc-2 homolog(LOC106576453) [Salmo salar]	LOC106576453	SHOC2				1.81489		2.39556	2.66078	4
MSTRG.25866|lypd2	ssa14: 80964643-80966169	Stringtie	Ly6/PLAUR domain-containing protein 2(lypd2) [Salmo salar]	lypd2	LYPD2			1.11796					4
LOC106580945|LOC106580945	ssa20: 57195460-57294594	Stringtie	multiple epidermal growth factor-like domains protein 6 [Salmo salar]	megf6	MEGF6			1.03702	1.62797		1.28667	1.29801	4
ncana|ncana	ssa03: 44796770-44869430	Stringtie	neurocan a(ncana) [Salmo salar]	ncana	NCANA						1.31326		4
MSTRG.6092|LOC106601046	ssa03: 59448826-59466030	Stringtie	plexin domain-containing protein 1-like [Salmo salar]	plxdc1	PLXDC1				1.08393		1.30736	1.54313	4
MSTRG.5367|LOC106599541	ssa03: 19269650-19291844	Stringtie	protein SNORC-like [Salmo salar]	snorc	SNORC				1.71945			1.98618	4
MSTRG.3695|LOC106583590	ssa02: 43440818-43458831	Stringtie	sal-like protein 3(LOC106583590) [Salmo salar]	LOC106583590	LOC107987236		1.03069	1.09992					4
MSTRG.40600|sall3b	ssa27: 5064757-5080023	Stringtie	spalt-like transcription factor 3b(sall3b) [Salmo salar]	sall3b	SALL3B				1.24012		1.87643	1.96384	4
MSTRG.27492|si:dkey-6n6.1	ssa15: 79853772-79867768	Stringtie	Uncharacterized LOC106572038 [Salmo salar]	LOC106572038	--				1.07692			1.65887	4
MSTRG.32657|zgc:112332	ssa19: 8864438-8876625	Stringtie	uncharacterized LOC106578408 [Salmo salar]	LOC106578408	--				1.14849				4
MSTRG.13979|LOC106610127	ssa08: 8571398-8580235	Stringtie	zinc finger protein 629-like [Salmo salar]	znf629	ZNF629				2.8029				4
MSTRG.43513|LOC106597256	NW_025547841.1: 43959-60069	Stringtie	zymogen granule membrane protein 16-like [Salmo salar]	zg16	ZG16							4.11698	4
MSTRG.21122|LOC106564737	ssa12: 30273230-30302172	Stringtie|BLASTx	collagen alpha-1(IX) chain-like(LOC106564737) [Salmo salar]	LOC106564737	MRPL4							1.4189	4
MSTRG.33510|klhl15	ssa19: 69832319-69903914	Stringtie|BLASTx	MICOS complex subunit MIC27-like(LOC106579467) [Salmo salar]	LOC106579467	ACOT9		-1.5991						4
MSTRG.32982|micu1	ssa19: 41084319-41189727	Stringtie|BLASTx	mitochondrial calcium uptake 1(micu1) [Salmo salar]	micu1	MICU1							3.20769	4
MSTRG.32723|col11a1a	ssa19: 13357395-13452978	Stringtie|BLASTx	collagen, type XI, alpha 1a(col11a1a) [Salmo salar]	col11a1a	COL11A1						1.1673	1.4736	4
MSTRG.32723	ssa19: 13357395-13452978	Stringtie|BLASTx	collagen, type XI, alpha 1a(col11a1a) [Salmo salar]	col11a1a	COL11A1				2.48148				4
MSTRG.40726|LOC106588396	ssa27: 10644323-10694398	Stringtie|BLASTx	collagen alpha-2(XI) chain(LOC106588396) [Salmo salar]	LOC106588396	COL11A1							1.13649	4
MSTRG.42233|si:dkey-225n22.4	ssa29: 17676399-17734409	Stringtie|BLASTx	collagen alpha-1(XXI) chain(si:dkey-225n22.4) [Salmo salar]	si:dkey-225n22.4	COL21A1							1.09777	4
MSTRG.18377	ssa10: 108557267-108573024	Stringtie|BLASTx	dickkopf WNT signaling pathway inhibitor 3b(dkk3b) [Salmo salar]	dkk3b	DKK3							1.25699	4
MSTRG.33174	ssa19: 53784544-53816029	Stringtie|BLASTx	ETS translocation variant 4-like(LOC106579328) [Salmo salar]	LOC106579328	ETV4		1.05447						4
MSTRG.25512|LOC106570016	ssa14: 62442610-62744024	Stringtie|BLASTx	microtubule-actin cross-linking factor 1-like(LOC106570016) [Salmo salar]	LOC106570016	MACF1				1.43909				4
MSTRG.26033	ssa14: 91032559-91133986	Stringtie|BLASTx	rap guanine nucleotide exchange factor 5-like(LOC106570585) [Salmo salar]	LOC106570585	RAPGEF5		-1.68055						4
MSTRG.24844	ssa14: 27686708-27857292	Stringtie|BLASTx	zinc finger protein 521(LOC106569178) [Salmo salar]	LOC106569178	ZNF521		-3.42752						4
MSTRG.17731	ssa10: 62824880-63123644	BLASTx	Inactive tyrosine-protein kinase PEAK1 [Mus musculus]		PEAK1	6.04182							5
MSTRG.7425	ssa04: 11318648-11462512	BLASTx	Hydroperoxide isomerase ALOXE3 [Homo sapiens]		ALOXE3	2.62318							5
MSTRG.14013|LOC106610116	ssa08: 9438781-9867529	Stringtie	zinc finger and SCAN domain-containing protein 22-like(LOC106610116) [Salmo salar]	LOC106610116	ZSCAN22	2.53016							5
MSTRG.46038|LOC123736411	NW_025549371.1: 10564-20575	Stringtie	uncharacterized LOC123736411(LOC123736411) [Salmo salar]	LOC123736411	HIVEP2	2.47457							5
MSTRG.22392	ssa13: 3463208-3484306	BLASTx	V-type proton ATPase subunit S1 [Drosophila melanogaster]		ATP6AP1	2.42271							5
MSTRG.17405	ssa10: 38841393-38870833	BLASTx	Desmoglein-2.1 [Danio rerio]		DSG2	1.83732							5
MSTRG.5113|LOC106596996	ssa03: 9018063-9108192	Stringtie	activated CDC42 kinase 1(LOC106596996) [Salmo salar]	LOC106596996	TNK2	1.71074							5
MSTRG.32301|LOC106577884	ssa18: 74344593-74356360	Stringtie	cilia- and flagella-associated protein 251-like(LOC106577884) [Salmo salar]	LOC106577884	SCHIP1	1.70074							5
MSTRG.17440|igfbp1a	ssa10: 40627294-40666947	Stringtie	insulin-like growth factor binding protein 1a(igfbp1a) [Salmo salar]	igfbp1a	IGFBP1	1.35687							5
MSTRG.41063|tpd52	ssa27: 25623582-25652842	Stringtie	tumor protein D52(tpd52) [Salmo salar]	tpd52	TPD52	1.32951		1.80915					5
MSTRG.32151|mfa3l	ssa18: 69287403-69313438	Stringtie|BLASTx	Microfibrillar-associated protein 3-like(mfa3l) [Salmo salar]	mfa3l	MFAP3L	1.26133							5
MSTRG.27025	ssa15: 50585773-50590283	BLASTx	40S ribosomal protein S7 [Takifugu rubripes]		RPS7	1.2154		1.93249					5
MSTRG.29004|LOC106574331	ssa16: 62552682-62626835	Stringtie	muscleblind-like protein 2a(LOC106574331) [Salmo salar]	LOC106574331	MBNL2	1.16532							5
MSTRG.20486	ssa12: 5426540-5466767	BLASTx	Zinc finger protein 568 [Homo sapiens]		ZNF568	-1.00879							5
MSTRG.36004|LOC106582548	ssa21: 56776365-56780869	Stringtie|BLASTx	frizzled-7-A(LOC106582548) [Salmo salar]	LOC106582548	FZD7	-1.02171						1.04751	5
MSTRG.37946	ssa23: 50094361-50131593	Stringtie|BLASTx	RAB11a, member RAS oncogene family(rab11a) [Salmo salar]	rab11a	RAB11A	-1.031							5
MSTRG.17479|LOC106560455	ssa10: 43372651-43421589	Stringtie	leucine rich adaptor protein 1(LOC106560455) [Salmo salar]	LOC106560455	LURAP1	-1.03511							5
MSTRG.41091|LOC106588847	ssa27: 28307705-28314145	Stringtie	uncharacterized LOC106588847(LOC106588847) [Salmo salar]	LOC106588847	LOC106588847	-1.03818							5
MSTRG.28928|dpt	ssa16: 57725840-57759764	Stringtie|BLASTx	dermatopontin(dpt) [Salmo salar]	dpt	DPT	-1.06918							5
MSTRG.30141	ssa17: 26557654-26560816	BLASTx	Uncharacterized WD repeat-containing protein sll0163 [Synechocystis sp. PCC 6803 substr. Kazusa]		--	-1.07062							5
LOC106585509|LOC106585509	ssa24: 23942667-23947248	Stringtie	4-hydroxyphenylpyruvate dioxygenase(LOC106585509) [Salmo salar]	LOC106585509	HPD	-1.07278							5
MSTRG.38927	ssa25: 11119151-11121113	BLASTn	protein Wnt-10a (LOC112235528), transcript variant X4, misc_RNA [Oncorhynchus tshawytscha]		WNT10A	-1.08103							5
MSTRG.33780|LOC106579784	ssa20: 1174494-1258486	Stringtie|BLASTx	collagen alpha-3(IV) chain(LOC106579784) [Salmo salar]	LOC106579784	COL4A3	-1.08743	-1.33676						5
MSTRG.21015|LOC106564594	ssa12: 24604464-24732924	Stringtie	xylosyltransferase 1-like [Salmo salar]	xylt1	XYLT1	-1.09773							5
MSTRG.34727	ssa20: 56350433-56382310	BLASTx	Transmembrane protein 255B [Homo sapiens]		TMEM255B	-1.09854							5
MSTRG.21374	ssa12: 40343737-40410882	BLASTx	Angiopoietin-1 [Homo sapiens]		TEK	-1.11133							5
MSTRG.25085|LOC106569508	ssa14: 37394949-37421209	Stringtie	glutamate decarboxylase 1-like(LOC106569508) [Salmo salar]	LOC106569508	GAD1	-1.11938							5
MSTRG.32959	ssa19: 39715260-39906569	BLASTx	Calpain-8 [Homo sapiens]		CAPN8	-1.1227							5
MSTRG.2550	ssa01: 165332309-165463368	BLASTx	Tyrosine-protein kinase transmembrane receptor ROR2 [Mus musculus]		ROR2	-1.13111							5
MSTRG.41643	ssa28: 15528145-15596489	BLASTx	Extracellular serine/threonine protein kinase FAM20C [Mus musculus]		FAM20C	-1.15233							5
MSTRG.17044|LOC106613713	ssa10: 19436370-19460885	Stringtie	cortexin-1-like(LOC106613713) [Salmo salar]	LOC106613713	CTXN1	-1.18489							5
MSTRG.15911|LOC106612354	ssa09: 106903459-107058565	Stringtie|BLASTx	somatostatin-2(LOC106612354) [Salmo salar]	LOC106612354	SST	-1.19156							5
MSTRG.39725	ssa26: 10651636-10664048	BLASTx	Transposable element Tcb1 transposase [Caenorhabditis briggsae]		--	-1.21461	-1.11099	-1.8297					5
LOC106589938|LOC106589938	ssa28: 36865186-36891948	Stringtie	pantothenate kinase 1(LOC106589938) [Salmo salar]	LOC106589938	PANK1	-1.23228							5
MSTRG.20693	ssa12: 13367693-13369166	BLASTn	uncharacterized LOC127925752 [Oncorhynchus keta]		--	-1.25312							5
MSTRG.15920|LOC106612333	ssa09: 107841748-107855316	Stringtie|BLASTx	phytanoyl-CoA dioxygenase domain-containing protein 1(LOC106612333) [Salmo salar]	LOC106612333	PHYHD1	-1.28211							5
MSTRG.2604	ssa01: 170880809-170894074	BLASTn	uncharacterized LOC106572412 [Salmo salar]	LOC106572412	--	-1.32289							5
MSTRG.2113	ssa01: 142629661-142654479	BLASTx	F-box/WD repeat-containing protein 5 [Homo sapiens]		FBXW5	-1.33237							5
MSTRG.16231	ssa09: 125065386-125367911	BLASTx	Schwannomin-interacting protein 1 [Mus musculus]		SCHIP1	-1.34917							5
MSTRG.4714	ssa02: 83824362-83832409	BLASTx	Trophinin [Homo sapiens]		TRO	-1.36863							5
MSTRG.30688	ssa17: 60649242-60653269	BLASTx	Glycosyltransferase 8 domain-containing protein 2 [Macaca fascicularis]		GLT8D2	-1.40033							5
MSTRG.16133|LOC106612642	ssa09: 120189649-121291309	Stringtie	limbic system-associated membrane protein-like(LOC106612642) [Salmo salar]	LOC106612642	LSAMP	-1.40772							5
MSTRG.23289|LOC106567375	ssa13: 50089938-50196928	Stringtie	sterile alpha motif domain-containing protein 11(LOC106567375) [Salmo salar]	LOC106567375	SAMD11	-1.42447							5
MSTRG.37720	ssa23: 39721531-39721844	BLASTn	uncharacterized LOC127916193 [Oncorhynchus keta]		--	-1.48637							5
MSTRG.2112|LOC106566760	ssa01: 142629554-142644447	Stringtie	Uncharacterized LOC106566760 [Salmo salar]	LOC106566760	--	-1.54622							5
MSTRG.25627|LOC123726764	ssa14: 67235893-67243889	Stringtie|BLASTx	perforin-1-like(LOC123726764) [Salmo salar]	LOC123726764	PRF1	-1.56978	-1.45984						5
MSTRG.27649	ssa15: 87487385-87496046	BLASTx	Leiomodin-1 [Rattus norvegicus]		LMOD1	-1.60435							5
MSTRG.7952	ssa04: 36807926-36948891	BLASTx	Collagen alpha-1(XXIII) chain [Mus musculus]		COL23A1	-1.61158							5
MSTRG.32777|LOC106578547	ssa19: 18296512-18422563	Stringtie	homeobox protein Mohawk-like(LOC106578547) [Salmo salar]	LOC106578547	MKX	-1.66008							5
MSTRG.2089	ssa01: 141372224-141398330	BLASTx	Golgin subfamily A member 2 [Homo sapiens]		GOLGA2	-1.7443							5
MSTRG.34478	ssa20: 44298541-44312549	BLASTn	uncharacterized LOC112265029 [Oncorhynchus tshawytscha]		--	-1.77892							5
MSTRG.34112	ssa20: 24042559-24050635	BLASTx	Coxsackievirus and adenovirus receptor homolog [Danio rerio]		CAR	-1.8079							5
MSTRG.26745	ssa15: 33624612-33658652	BLASTx	Ankyrin repeat domain-containing protein 6 [Homo sapiens]		ANKRD6	-1.85179							5
MSTRG.10242|LOC106605563	ssa05: 70445161-70707300	BLASTx	Hemicentin-2 [Mus musculus]		HMCN2	-2.08466							5
MSTRG.15221	ssa09: 58784055-58787861	BLASTx	Glutathione S-transferase P [Bos taurus]		GSTP1	-2.30195							5
MSTRG.44523	NW_025548357.1: 11065-59763	BLASTn	mucin-2-like (LOC106591067), mRNA [Salmo salar]	LOC106591067	MUC2	-2.38048							5
MSTRG.7792|LOC106602760	ssa04: 26389366-26428451	Stringtie|BLASTx	CD209 antigen-like protein E(LOC106602760) [Salmo salar]	LOC106602760	CLEC4E	-2.76273							5
MSTRG.15333	ssa09: 69135395-69143043	BLASTx	ETS-related transcription factor Elf-2 [Homo sapiens]		ELF2	-25.0314							5
MSTRG.23222|LOC106566966	ssa13: 45198516-45248933	Stringtie	renin binding protein(LOC106566966) [Salmo salar]	LOC106566966	REN					-1.08809			5
MSTRG.41880	ssa28: 29435802-29492076	BLASTx	Brefeldin A-inhibited guanine nucleotide-exchange protein 1 [Homo sapiens]		ARFGEF1					-1.99242			5
MSTRG.26856	ssa15: 40453067-40456810	BLASTx	Cyclic AMP-dependent transcription factor ATF-3 [Mus musculus]		ATF3			1.83687		1.43505			5
MSTRG.22480|LOC106592833	ssa13: 9484691-9646860	Stringtie|BLASTx	aerolysin-like protein(LOC106566390) [Salmo salar]	LOC106566390	--					-3.46008			5
MSTRG.1284|LOC106611767	ssa01: 84856469-84895283	Stringtie	histone acetyltransferase KAT6B(LOC106611767) [Salmo salar]	LOC106611767	KAT6B					-3.16942			5
MSTRG.8770	ssa04: 81060208-81068523	BLASTx	Ubiquitin-conjugating enzyme E2 G1 [Homo sapiens]		UBE2G1					-4.44842			5
MSTRG.28528	ssa16: 34444000-34447125	BLASTx	Transposable element Tcb1 transposase [Caenorhabditis briggsae]		--		-1.23913	-1.54532		-1.38262			5
MSTRG.7495	ssa04: 15345052-15359424	BLASTx	40S ribosomal protein S3a [Salmo salar]	rps3a	RPS3A					10.8956			5
MSTRG.28972	ssa16: 59920489-60026815	Stringtie	cyclin-dependent kinase-like 5(LOC106573992) [Salmo salar]	LOC106573992	CDKL5					-1.00679			5
MSTRG.20624|LOC106564147	ssa12: 10790108-10809679	BLASTx	Probable RNA-directed DNA polymerase from transposon X-element [Drosophila melanogaster]		--		-1.53955			-1.29726			5
MSTRG.35006	ssa20: 72224573-72232478	BLASTx	FMR1-interacting protein NUFIP2 [Homo sapiens]		NUFIP2			-9.47536		-5.3779			5
MSTRG.43961	NW_025548105.1: 173-2043	BLASTx	Zinc finger BED domain-containing protein 4 [Homo sapiens]		ZBED4					2.72043			5
MSTRG.20905	ssa12: 20833967-21129252	BLASTx	PAT complex subunit Asterix [Bos taurus]		WDR83OS		4.26467			6.75204			5
MSTRG.24590	ssa14: 13548996-13550771	BLASTn	uncharacterized LOC123739888 (LOC123739888), transcript variant X1, ncRNA [Salmo salar]	LOC123739888	--					-1.08577			5
MSTRG.1352|LOC106609580	ssa01: 89100464-89101719	Stringtie	piggyBac transposable element-derived protein 4-like [Salmo salar]	pgbd4	PGBD4					-1.08671			5
MSTRG.8068|LOC106603075	ssa04: 40720993-40748029	Stringtie|BLASTx	palmitoyltransferase ZDHHC20-B-like(LOC106603075) [Salmo salar]	LOC106603075	ZDHHC20							-1.71344	5
MSTRG.45375	NW_025548823.1: 19655-31716	BLASTn	CCR4-NOT transcription complex subunit 4-like (LOC115191044), mRNA [Salmo trutta]		CNOT4			-5.7998					5
MSTRG.7861	ssa04: 31701771-31768359	BLASTn	fibroin heavy chain-like (LOC106602832), transcript variant X2, mRNA [Salmo salar]	LOC106602832	--			-2.70452					5
MSTRG.1804	ssa01: 127426601-127427675	BLASTn	protein O-glucosyltransferase 1-like (LOC129840585), mRNA [Salvelinus fontinalis]		POGLUT1		-1.35409						5
MSTRG.20280	ssa11: 102442483-102456868	BLASTn	uncharacterized LOC106563843 (LOC106563843), transcript variant X1, mRNA [Salmo salar]	LOC106563843	--		-1.41782						5
MSTRG.21291	ssa12: 36206396-36323473	BLASTn	uncharacterized LOC106564983 (LOC106564983), ncRNA [Salmo salar]	LOC106564983	--		-2.60615						5
MSTRG.8638	ssa04: 71016608-71022291	BLASTn	uncharacterized LOC127933102 [Oncorhynchus keta]		--							-25.5811	5
MSTRG.32183	ssa18: 70208608-70242062	BLASTx	Calpain-8 [Homo sapiens]		CAPN8						-1.35394		5
MSTRG.24942	ssa14: 32890106-32918544	BLASTx	CDK5 and ABL1 enzyme substrate 1 [Homo sapiens]		CABLES1		-1.56037						5
MSTRG.19722	ssa11: 75625417-75771233	BLASTx	Collagen alpha-2(I) chain [Lithobates catesbeianus]		COL1A2		-1.13654						5
MSTRG.32279	ssa18: 73330187-73365977	BLASTx	Dynactin subunit 1 [Sus scrofa]		DCTN1		-2.84639						5
MSTRG.42390	ssa29: 27101485-27158905	BLASTx	Eukaryotic translation initiation factor 2 subunit 3 [Danio rerio]		EIF2S3				-5.62565				5
MSTRG.40136	ssa26: 32721293-32886856	BLASTx	Fibrillin-1 [Homo sapiens]		FBN1							1.83239	5
MSTRG.16531	ssa09: 141635135-141751040	BLASTx	Forkhead box protein L2 [Mus musculus]		FOXL2		-1.91358						5
MSTRG.30497	ssa17: 50078481-50139116	BLASTx	GRAM domain-containing protein 4 [Mus musculus]		GRAMD4				-10.926		-23.8247		5
MSTRG.47427	NW_025550945.1: 338128-342818	BLASTx	GRB2-related adapter protein [Homo sapiens]		GRAP							-10.9451	5
MSTRG.35010	ssa20: 72408087-72415834	BLASTx	Heat shock 70 kDa protein 13 [Homo sapiens]		HSPA13			-24.6463				23.4009	5
MSTRG.6223	ssa03: 64103279-64131327	BLASTx	Hemoglobin subunit alpha [Salmo salar]	hba2	HBA2							-5.02043	5
MSTRG.5791	ssa03: 43653023-43712119	BLASTx	Kelch-like protein 24 [Rattus norvegicus]		KLHL24			2.85368					5
MSTRG.40744	ssa27: 10993698-11078026	BLASTx	Major histocompatibility complex class I-related gene protein [Pongo pygmaeus]		MR1		-1.00646						5
MSTRG.42641	ssa29: 42372919-42430954	BLASTx	Membrane-bound transcription factor site-2 protease [Mus musculus]		MBTPS2			-1.96174					5
MSTRG.19638	ssa11: 70644404-70675735	BLASTx	Myocyte-specific enhancer factor 2C [Homo sapiens]		MEF2C				-6.25403				5
MSTRG.38801	ssa24: 46254520-46324184	BLASTx	Myotubularin-related protein 12 [Danio rerio]		MTMR12				-2.08613				5
MSTRG.35103	ssa20: 81905712-81930218	BLASTx	N-acetylated-alpha-linked acidic dipeptidase 2 [Homo sapiens]		NAALAD2			-6.99557					5
MSTRG.5871	ssa03: 49698223-49705766	BLASTx	Nucleoside diphosphate kinase [Drosophila melanogaster]		NME1				3.14273				5
MSTRG.16270	ssa09: 126662424-126679991	BLASTx	PHD finger protein 13 [Mus musculus]		PHF13			-3.16731					5
MSTRG.39658	ssa26: 7068585-7085956	BLASTx	Plant intracellular Ras-group-related LRR protein 1 [Oryza sativa Japonica Group]		--			1.58595					5
MSTRG.2046	ssa01: 137923088-137945583	BLASTx	Podocin [Homo sapiens]		NPHS2		-1.48814						5
MSTRG.28594	ssa16: 38045612-38181650	BLASTx	Potassium/sodium hyperpolarization-activated cyclic nucleotide-gated channel 1 [Homo sapiens]		HCN1			-8.36306					5
MSTRG.24357	ssa14: 4544594-4586676	BLASTx	pre-mRNA 3' end processing protein WDR33 [Mus musculus]		WDR33		-1.44374						5
MSTRG.42489	ssa29: 34602732-34666150	BLASTx	Probable RNA-directed DNA polymerase from transposon X-element [Drosophila melanogaster]		--							-3.27518	5
MSTRG.11762	ssa06: 41649025-41676611	BLASTx	Protein phosphatase 1 regulatory subunit 1B [Bos taurus]		PPP1R1B		-1.10626						5
MSTRG.10934	ssa06: 8151398-8240632	BLASTx	Rho GDP-dissociation inhibitor 2 [Bos taurus]		ARHGDIB		-1.21359				-1.48486		5
MSTRG.12233	ssa06: 69015038-69126576	BLASTx	Ribosomal protein S6 kinase delta-1 [Homo sapiens]		RPS6KC1				-7.95392				5
MSTRG.33121	ssa19: 51126238-51164122	BLASTx	Serine protease HTRA1B [Danio rerio]		HTRA1			7.2225					5
MSTRG.10122	ssa05: 67461598-67534506	BLASTx	Serine/threonine-protein kinase minibrain [Drosophila melanogaster]		--		-1.07301						5
MSTRG.13301	ssa07: 38308211-38313449	BLASTx	Short transmembrane mitochondrial protein 1 [Danio rerio]		STMP1			-3.00513					5
MSTRG.8249	ssa04: 49311341-49338865	BLASTx	SWI/SNF-related matrix-associated actin-dependent regulator of chromatin subfamily A member 5 [Homo sapiens]		SMARCA5		1.4788						5
MSTRG.3675	ssa02: 42186335-42213550	BLASTx	T-cell surface glycoprotein CD4 [Rattus norvegicus]		CD4						-6.3819		5
MSTRG.12473|LOC106608163	ssa06: 86334280-86354343	BLASTx	Thrombospondin-1 [Homo sapiens]		THBS1				2.0576				5
MSTRG.27917	ssa15: 100592474-100608898	BLASTx	Transmembrane 9 superfamily member 4 [Pongo abelii]		TM9SF4		-1.07785						5
MSTRG.27070	ssa15: 53712525-53720751	BLASTx	Transposable element Tc1 transposase [Caenorhabditis elegans]		--			10.6736					5
MSTRG.24013	ssa13: 95784660-95803897	BLASTx	Tricarboxylate transport protein, mitochondrial [Homo sapiens]		SLC25A1			2.01105					5
MSTRG.21087	ssa12: 29344654-29419460	BLASTx	Trinucleotide repeat-containing gene 6C protein [Homo sapiens]		TNRC6C							12.2488	5
MSTRG.10363	ssa05: 74402745-74416215	BLASTx	U4/U6 small nuclear ribonucleoprotein Prp3 [Homo sapiens]		PRPF3		-2.09176						5
MSTRG.21386	ssa12: 41903736-41924054	BLASTx	Uncharacterized protein F30B5.4 [Caenorhabditis elegans]		--		-1.72169		-2.74129				5
MSTRG.44651	NW_025548408.1: 9-7050	BLASTx	Uncharacterized protein KIAA0930 homolog [Mus musculus]		KIAA0930			1.02108					5
MSTRG.39310	ssa25: 35081278-35333965	BLASTx	Unconventional myosin-XVI [Homo sapiens]		MYO16			-6.96658				6.86894	5
MSTRG.1291	ssa01: 84960937-84984121	BLASTx	Voltage-dependent anion-selective channel protein 2 [Meleagris gallopavo]		VDAC2				-2.33701			-3.49003	5
MSTRG.43534	NW_025547873.1: 48559-57352	BLASTx	Zinc finger C3HC-type protein 1 [Mus musculus]		ZC3HC1						-3.4376		5
MSTRG.7328	ssa04: 7264488-7275664	BLASTx	Zinc finger protein 239 [Mus musculus]		ZNF239		-1.17913						5
MSTRG.32957|LOC106578801	ssa19: 39654773-39690164	Stringtie	calpain-2 catalytic subunit(LOC106578801) [Salmo salar]	LOC106578801	CAPN2				-1.40563				5
MSTRG.4960|LOC106610423	ssa03: 18120-23565	Stringtie	CD209 antigen-like protein C(LOC106610423) [Salmo salar]	LOC106610423	CD209			-1.50804					5
MSTRG.20193|LOC106563768	ssa11: 97905587-97918332	Stringtie	CLOCK-interacting pacemaker-like(LOC106563768) [Salmo salar]	LOC106563768	CIPC				-2.32704				5
MSTRG.8370	ssa04: 53644668-53664717	Stringtie	Collagenase 3(mmp13) [Salmo salar]	mmp13	MMP13			5.98642					5
MSTRG.3649|LOC106583166	ssa02: 40751744-40768982	Stringtie	cornifelin-like(LOC123723997) [Salmo salar]	LOC123723997	CNFN						1.02365		5
MSTRG.29484|LOC106591402	ssa16: 84700415-84713113	Stringtie	interleukin-18 receptor accessory protein-like(LOC106591402) [Salmo salar]	LOC106591402	IL18RAP			-1.244					5
MSTRG.17261|jun	ssa10: 30343879-30346017	Stringtie	Jun proto-oncogene, AP-1 transcription factor subunit(jun) [Salmo salar]	jun	JUN				1.21648				5
MSTRG.31248|LOC106576859	ssa18: 5615837-5663333	Stringtie	LIM domain-binding protein 1-like(LOC106576859) [Salmo salar]	LOC106576859	LDB1				-1.37871				5
MSTRG.21258|LOC106564843	ssa12: 34797578-34803778	Stringtie	NLR family CARD domain-containing protein 3-like(LOC106564843) [Salmo salar]	LOC106564843	NLRC3		-1.0982						5
MSTRG.11664|LOC106607367	ssa06: 37784157-37788849	Stringtie	serotonin N-acetyltransferase(LOC106607367) [Salmo salar]	LOC106607367	AANAT							-8.22359	5
MSTRG.27600|LOC106572390	ssa15: 86207189-86211821	Stringtie	tumor necrosis factor receptor superfamily member 9-like(LOC106572390) [Salmo salar]	LOC106572390	TNFRSF9							-1.2527	5
MSTRG.23475|LOC106567574	ssa13: 65237406-65284806	Stringtie	ubiquitin carboxyl-terminal hydrolase 2(LOC106567574) [Salmo salar]	LOC106567574	USP2							-1.837	5
MSTRG.41771|LOC106589724	ssa28: 22342370-22349809	Stringtie	uncharacterized LOC106589724(LOC106589724) [Salmo salar]	LOC106589724	--		-4.17618						5
MSTRG.21290|LOC106599968	ssa12: 36178270-36180057	Stringtie	uncharacterized LOC106599968(LOC106599968) [Salmo salar]	LOC106599968	--		-2.26177						5
MSTRG.5142|LOC123741603	ssa03: 10752490-10806482	Stringtie	uncharacterized LOC123741603(LOC123741603) [Salmo salar]	LOC123741603	--				-5.70709				5
MSTRG.1280|LOC123744600	ssa01: 84451978-84463522	Stringtie	uncharacterized LOC123744600(LOC123744600) [Salmo salar]	LOC123744600	--				-7.95291				5
MSTRG.27337|LOC123727133	ssa15: 71472029-71477381	Stringtie	WAP four-disulfide core domain protein 2-like(LOC123727133) [Salmo salar]	LOC123727133	WFDC2			-2.82573					5
MSTRG.10555|LOC106605916	ssa05: 80887605-81159041	Stringtie	zymogen granule membrane protein 16-like(LOC106605916) [Salmo salar]	LOC106605916	ZG16		-2.12169						5
LOC106573931|LOC106573931	ssa16: 44413275-44465250	Stringtie	adenomatous polyposis coli protein 2-like(LOC106573931) [Salmo salar]	LOC106573931	AGPAT4		-1.03227						5
MSTRG.33916|LOC106580115	ssa20: 14005423-14057503	Stringtie	apoptosis-inducing factor 3 [Salmo salar]	aifm3	AIFM3		-1.11497						5
LOC106578975|LOC106578975	ssa19: 50032091-50045617	Stringtie	cone cGMP-specific 3',5'-cyclic phosphodiesterase subunit alpha'-like(LOC106578975) [Salmo salar]	LOC106578975	PDE6C		-1.39924						5
MSTRG.42102|LOC106590113	ssa29: 10356024-10358777	Stringtie	OTU domain-containing protein 1-like [Salmo salar]	otud1	OTUD1				1.54866				5
MSTRG.29453|LOC123727903	ssa16: 82896249-82902004	Stringtie	OX-2 membrane glycoprotein-like [Salmo salar]	cd200	CD200						-2.79682		5
MSTRG.21869|LOC106565640	ssa12: 68031949-68095194	Stringtie|BLASTx	rootletin(LOC106565640) [Salmo salar]	LOC106565640	NECAP2				-5.81212				5
MSTRG.8395|LOC106603524	ssa04: 55115072-55621067	Stringtie|BLASTx	autism susceptibility gene 2 protein(LOC106603524) [Salmo salar]	LOC106603524	AUTS2			-2.30291					5
MSTRG.33780|sst1.2	ssa20: 1174494-1258486	Stringtie|BLASTx	collagen alpha-3(IV) chain(LOC106579784) [Salmo salar]	LOC106579784	COL4A3		-1.50893						5
MSTRG.38813|LOC106585979	ssa24: 46908139-47034125	Stringtie|BLASTx	terminal uridylyltransferase 7(LOC106585979) [Salmo salar]	LOC106585979	ISCA1							9.51634	5
MSTRG.8639|klhl35	ssa04: 71016608-71031412	Stringtie|BLASTx	kelch-like family member 35(klhl35) [Salmo salar]	klhl35	KLHL35			-1.22207					5
MSTRG.18483|LOC123724619	ssa10: 114150528-114247458	Stringtie|BLASTx	ladderlectin-like(LOC123724619) [Salmo salar]	LOC123724619	--		-2.61213						5
MSTRG.18483	ssa10: 114150528-114247458	Stringtie|BLASTx	ladderlectin-like(LOC123724619) [Salmo salar]	LOC123724619	--		-2.14355						5
MSTRG.38215|LOC106585028	ssa24: 14849284-14865648	Stringtie|BLASTx	mesoderm induction early response protein 3-like(LOC106585028) [Salmo salar]	LOC106585028	MIER3				2.98925				5
MSTRG.15175|letm1	ssa09: 54387809-54440834	Stringtie|BLASTx	leucine zipper-EF-hand containing transmembrane protein 1(letm1) [Salmo salar]	letm1	LETM1		-2.85856						5
MSTRG.2762|LOC106592873	ssa02: 7171272-7300479	Stringtie|BLASTx	RNA-binding protein 12B(LOC106592873) [Salmo salar]	LOC106592873	RBM12B		-10.4645					9.58017	5
MSTRG.6015|LOC106600868	ssa03: 55812308-55851591	Stringtie|BLASTx	sodium channel protein type 4 subunit alpha B(LOC106600868) [Salmo salar]	LOC106600868	SCN4A		-1.21805						5
MSTRG.6383|LOC106601325	ssa03: 68508547-68513411	Stringtie|BLASTx	sphingosine 1-phosphate receptor 1(LOC106601325) [Salmo salar]	LOC106601325	S1PR1		1.36992						5
MSTRG.28768|LOC106574072	ssa16: 45173101-45234930	Stringtie|BLASTx	syntaxin-6-like(LOC106574072) [Salmo salar]	LOC106574072	STX6		-1.07483						5
MSTRG.29014|LOC106574319	ssa16: 63182372-63188625	Stringtie|BLASTx	tubulin beta-4B chain-like(LOC106574319) [Salmo salar]	LOC106574319	TUBB4B		-2.13405						5
MSTRG.3750	ssa02: 47717967-47749965	BLASTx	Serine incorporator 1 [Rattus norvegicus]		SERINC1	3.71416							6
MSTRG.29767	ssa17: 9488709-9497653	BLASTx	FAST kinase domain-containing protein 4 [Homo sapiens]		TBRG4	1.62422							6
MSTRG.30910|LOC106609600	ssa17: 70006876-70065864	Stringtie	plasma membrane calcium-transporting ATPase 1(LOC106609600) [Salmo salar]	LOC106609600	ATP2B1	1.57296							6
MSTRG.40387	ssa26: 48831905-48833693	BLASTn	uncharacterized LOC127932190 [Oncorhynchus keta]		--	-1.00469							6
MSTRG.27695|magi3a	ssa15: 89652332-89968211	Stringtie	membrane associated guanylate kinase, WW and PDZ domain containing 3a(magi3a) [Salmo salar]	magi3a	MAGI3A	-1.00529				-1.3673			6
MSTRG.1987	ssa01: 134776675-134777954	BLASTn	protein O-glucosyltransferase 1-like [Salvelinus fontinalis]		POGLUT1	-1.00661							6
MSTRG.22693	ssa13: 21887751-21924634	BLASTx	Cytosolic sulfotransferase 3 [Danio rerio]		CHST3	-1.00898							6
MSTRG.9300|LOC100195531	ssa05: 25199893-25206300	Stringtie|BLASTx	chloride intracellular channel 2(LOC100195531) [Salmo salar]	LOC100195531	CLIC2	-1.01018							6
MSTRG.27812	ssa15: 95090610-95122947	BLASTx	Beta-1,4 N-acetylgalactosaminyltransferase 1 [Mus musculus]		B4GALNT1	-1.0109							6
MSTRG.26796	ssa15: 36965320-36975112	BLASTx	Interleukin-20 receptor subunit alpha [Homo sapiens]		IL20RA	-1.01102							6
MSTRG.18782|fshb	ssa11: 8584590-8589957	Stringtie	follicle stimulating hormone subunit beta(fshb) [Salmo salar]	fshb	FSHB	-1.0131							6
MSTRG.8659|LOC106603804	ssa04: 72682132-73007853	Stringtie	disks large homolog 2(LOC106603804) [Salmo salar]	LOC106603804	DLG2	-1.01375							6
MSTRG.25444|spaca4l	ssa14: 59842550-59854349	Stringtie	sperm acrosome associated 4 like(spaca4l) [Salmo salar]	spaca4l	SPACA4	-1.01447							6
MSTRG.36399	ssa22: 22503489-22544226	BLASTx	Sushi, von Willebrand factor type A, EGF and pentraxin domain-containing protein 1 [Rattus norvegicus]		SVEP1	-1.01485							6
MSTRG.27124	ssa15: 59518815-59590872	BLASTx	Forkhead box protein O1 [Ictidomys tridecemlineatus]		FOXO1	-1.01794							6
MSTRG.36842|rfesd	ssa22: 43887562-43896374	Stringtie	Rieske (Fe-S) domain containing(rfesd) [Salmo salar]	rfesd	RFESD	-1.01904							6
MSTRG.30496|cerk	ssa17: 49992071-50031630	Stringtie|BLASTx	ceramide kinase(cerk) [Salmo salar]	cerk	CERK	-1.02025			-1.07915				6
LOC106584549|LOC106584549	ssa23: 37335785-37449213	Stringtie	receptor-type tyrosine-protein phosphatase zeta(LOC106584549) [Salmo salar]	LOC106584549	PTPRZ1	-1.02032							6
MSTRG.36547|LOC106583208	ssa22: 29703252-29716059	Stringtie|BLASTx	GATA-binding factor 2-like(LOC106583208) [Salmo salar]	LOC106583208	GATA	-1.02048							6
MSTRG.33208|slc16a5a	ssa19: 55032650-55060563	Stringtie|BLASTx	solute carrier family 16 member 5a(slc16a5a) [Salmo salar]	slc16a5a	SLC16A5	-1.02077							6
LOC106609381|LOC106609381	ssa07: 47717305-47924753	Stringtie	liprin-alpha-2-like(LOC106609381) [Salmo salar]	LOC106609381	PPFIA4	-1.02204							6
MSTRG.42438|LOC106592044	ssa29: 29017335-29155283	Stringtie	RAB11-binding protein RELCH homolog [Salmo salar]	relch	RELCH	-1.02246							6
MSTRG.22241	ssa12: 92837853-92848934	BLASTn	uncharacterized LOC129841357 (LOC129841357), transcript variant X8, mRNA [Salvelinus fontinalis]		--	-1.02428							6
MSTRG.26557|rhag	ssa15: 28750009-28817053	Stringtie|BLASTx	Rh associated glycoprotein(rhag) [Salmo salar]	rhag	RHAG	-1.02621							6
MSTRG.12144|LOC106607829	ssa06: 64767645-64884011	Stringtie	polypeptide N-acetylgalactosaminyltransferase 14-like(LOC106607829) [Salmo salar]	LOC106607829	GALNT14	-1.02634							6
MSTRG.18020|LOC106560895	ssa10: 84326397-84330588	Stringtie	uncharacterized LOC106560895(LOC106560895) [Salmo salar]	LOC106560895	--	-1.0286							6
LOC106575327|LOC106575327	ssa17: 18394852-18402686	Stringtie	LON peptidase N-terminal domain and RING finger protein 2-like(LOC106575327) [Salmo salar]	LOC106575327	LONRF2	-1.03085							6
MSTRG.18031	ssa10: 84803007-84804253	BLASTn	coiled-coil domain-containing protein 71-like [Salvelinus fontinalis]		CCDC71	-1.03089							6
MSTRG.7670|LOC106602581	ssa04: 21110661-21164699	Stringtie	lectin(LOC106602581) [Salmo salar]	LOC106602581	--	-1.03118							6
MSTRG.19884	ssa11: 87179550-87190320	BLASTn	cytosolic purine 5'-nucleotidase-like [Coregonus clupeaformis]		NT5C2	-1.03121							6
MSTRG.28011	ssa15: 106873960-106877534	BLASTn	uncharacterized LOC118966125 [Oncorhynchus mykiss]		--	-1.03145							6
MSTRG.31789	ssa18: 44603627-44613380	No BLAST hit	--		--	-1.0315							6
MSTRG.4864	ssa02: 91093939-91097732	BLASTx	RNA-directed DNA polymerase from mobile element jockey [Drosophila melanogaster]		--	-1.03184							6
MSTRG.25267|vav3b	ssa14: 47053508-47242199	Stringtie|BLASTx	vav 3 guanine nucleotide exchange factor b(vav3b) [Salmo salar]	vav3b	VAV3	-1.03318							6
abcc2|abcc2	ssa18: 6915091-6972684	Stringtie	ATP-binding cassette, sub-family C (CFTR/MRP), member 2(abcc2) [Salmo salar]	abcc2	ABCC2	-1.03357							6
MSTRG.6267	ssa03: 65388170-65469745	BLASTx	Serine/threonine-protein kinase WNK4 [Mus musculus]		WNK4	-1.03419							6
LOC123724553|LOC123724553	ssa01: 128393442-128404207	Stringtie	leucine-rich repeat extensin-like protein 3 [Salmo salar]	--	--	-1.03482							6
MSTRG.10755|LOC106598261	ssa05: 92758808-92763000	Stringtie	protein LRATD2-like(LOC106598261) [Salmo salar]	LOC106598261	LRATD2	-1.035							6
MSTRG.6915	ssa03: 93894520-93897534	BLASTn	uncharacterized LOC127918032 [Oncorhynchus keta]		--	-1.03532							6
MSTRG.1253|LOC106612121	ssa01: 81643801-81662938	Stringtie	transmembrane protein 100 [Salmo salar]	tmem100	TMEM100	-1.03538							6
MSTRG.9035	ssa05: 8198188-8201704	BLASTx	Transposable element Tcb1 transposase [Caenorhabditis briggsae]		--	-1.03569							6
MSTRG.19380|LOC106561749	ssa11: 45251419-45460647	Stringtie|BLASTx	homer protein homolog 2(LOC106561749) [Salmo salar]	LOC106561749	HOMER2	-1.0358							6
MSTRG.39303	ssa25: 34450779-34473485	BLASTx	OX-2 membrane glycoprotein [Pongo abelii]		CD200	-1.03611	-1.37195						6
MSTRG.28525	ssa16: 34346941-34438329	BLASTx	Zinc finger protein ZFPM1 [Xenopus laevis]		ZFPM1	-1.03651							6
MSTRG.39968|LOC106587374	ssa26: 22423329-22440732	Stringtie	Uncharacterized LOC106587374 [Salmo salar]	LOC106587374	--	-1.03796							6
MSTRG.44326	NW_025548262.1: 12303-13328	No BLAST hit	--		--	-1.03833							6
MSTRG.38227	ssa24: 15246802-15265341	BLASTx	Urea transporter 2 [Oryctolagus cuniculus]		SLC14A2	-1.03923	-1.04838			-1.12217			6
MSTRG.33976	ssa20: 17444217-17449498	BLASTn	sushi domain-containing protein 1-like (LOC111957466), transcript variant X4, misc_RNA [Salvelinus alpinus]		SUSD1	-1.04013							6
MSTRG.42384|LOC106590494	ssa29: 26974980-27058745	Stringtie	apolipoprotein D(LOC106590494) [Salmo salar]	LOC106590494	APOD	-1.04043							6
MSTRG.31900|LOC106577529	ssa18: 56384152-56410984	Stringtie|BLASTx	mitogen-activated protein kinase kinase kinase kinase 2(LOC106577529) [Salmo salar]	LOC106577529	MAP4K2	-1.0437							6
MSTRG.34193	ssa20: 28050969-28122779	BLASTx	Ankyrin-3 [Mus musculus]		ANK3	-1.04479							6
MSTRG.24559|LOC106568959	ssa14: 12675725-12743221	Stringtie	small conductance calcium-activated potassium channel protein 2(LOC106568959) [Salmo salar]	LOC106568959	KCNN2	-1.0457							6
MSTRG.13762|LOC106609811	ssa07: 64532577-64626450	Stringtie	protein Wnt-5b(LOC106609811) [Salmo salar]	LOC106609811	WNT5B	-1.04679							6
MSTRG.31428|LOC106576941	ssa18: 15443090-15458385	Stringtie|BLASTx	neuroblast differentiation-associated protein AHNAK(LOC106576941) [Salmo salar]	LOC106576941	AHNAK	-1.04749							6
MSTRG.25901	ssa14: 83274453-83277733	BLASTn	UPF0711 protein C18orf21 homolog [Oncorhynchus mykiss]		C18orf21	-1.04838							6
MSTRG.5493|LOC106599272	ssa03: 27780503-27827545	Stringtie	microtubule-associated protein 4-like(LOC106599272) [Salmo salar]	LOC106599272	MAP4	-1.04932							6
MSTRG.46184	NW_025549628.1: 4854-13008	BLASTx	Receptor-type tyrosine-protein phosphatase beta [Homo sapiens]		PTPRB	-1.0517							6
MSTRG.43676	NW_025547979.1: 20292-23845	BLASTn	uncharacterized LOC129844687 (LOC129844687), transcript variant X1, mRNA [Salvelinus fontinalis]		--	-1.05201							6
MSTRG.26356	ssa15: 11965228-11971173	BLASTx	Transposable element Tc1 transposase [Caenorhabditis elegans]		--	-1.05379							6
LOC106589032|LOC106589032	ssa27: 37187270-37197318	Stringtie	transmembrane protein 200A-like(LOC106589032) [Salmo salar]	LOC106589032	TMEM200A	-1.05465							6
MSTRG.40010	ssa26: 25231722-25339819	BLASTx	Synaptotagmin-7 [Homo sapiens]		SYT7	-1.05582							6
MSTRG.17509	ssa10: 45365503-45528393	BLASTx	KN motif and ankyrin repeat domain-containing protein 4 [Homo sapiens]		KANK4	-1.05768							6
MSTRG.10454	ssa05: 77521740-77544654	BLASTx	Peroxisomal carnitine O-octanoyltransferase [Bos taurus]		CROT	-1.05807							6
MSTRG.43954	NW_025548099.1: 251076-251837	BLASTn	uncharacterized LOC129841357 (LOC129841357), transcript variant X8, mRNA [Salvelinus fontinalis]		--	-1.05824							6
MSTRG.5689|LOC106600142	ssa03: 37977422-37979505	Stringtie	C-C motif chemokine 20(LOC106600142) [Salmo salar]	LOC106600142	CCL20	-1.05841							6
MSTRG.43733	NW_025548021.1: 173066-176737	BLASTx	E3 ubiquitin/ISG15 ligase TRIM25 [Homo sapiens]		TRIM25	-1.05897							6
MSTRG.30884|LOC106576501	ssa17: 67132904-67180486	Stringtie	sortilin-like [Salmo salar]	sort1	SORT1	-1.0592		-1.06554					6
MSTRG.22574|si:ch211-180f4.1	ssa13: 14618090-14630738	Stringtie|BLASTx	uncharacterized LOC106566497(si:ch211-180f4.1) [Salmo salar]	si:ch211-180f4.1	LRRN1	-1.05953							6
MSTRG.33244|LOC106579256	ssa19: 56258591-56264974	Stringtie|BLASTx	gap junction delta-3 protein(LOC106579256) [Salmo salar]	LOC106579256	GJD3	-1.06023							6
MSTRG.8695	ssa04: 76518765-76557799	BLASTx	Protein Shroom1 [Xenopus laevis]		SHROOM1	-1.06084		-1.18021		-1.29187		-1.03332	6
MSTRG.44262|LOC106594685	NW_025548247.1: 25239-119243	Stringtie	slit homolog 1 protein(LOC106594685) [Salmo salar]	LOC106594685	SLIT1	-1.06116							6
MSTRG.32217	ssa18: 71359804-71369035	BLASTx	RNA-directed DNA polymerase from mobile element jockey [Drosophila melanogaster]		--	-1.06304							6
MSTRG.45980	NW_025549279.1: 33240-70044	BLASTx	Myosin-11 [Homo sapiens]		MYH11	-1.06361							6
MSTRG.24104|LOC106568400	ssa13: 100021027-100116916	Stringtie|BLASTx	integrin alpha-1-like(LOC106568400) [Salmo salar]	LOC106568400	ITGA1	-1.06716	-1.10024						6
MSTRG.26199	ssa15: 849935-1042860	BLASTx	Calcium/calmodulin-dependent protein kinase type II subunit beta [Bos taurus]		CAMK2B	-1.06953							6
MSTRG.23886|LOC106568097	ssa13: 89943240-89959819	Stringtie|BLASTx	short transient receptor potential channel 7(LOC106568097) [Salmo salar]	LOC106568097	TRPC7	-1.07546		-1.12068					6
MSTRG.23477|LOC106567575	ssa13: 65316356-65392128	Stringtie	ceramide synthase(LOC106567575) [Salmo salar]	LOC106567575	TLCD3B	-1.07608							6
MSTRG.16583|tyr	ssa09: 147134517-147147268	Stringtie	tyrosinase(tyr) [Salmo salar]	tyr	TYR	-1.07624							6
MSTRG.15501	ssa09: 75911436-75913806	BLASTn	uncharacterized LOC106577538 [Salmo salar]	LOC106577538	--	-1.07656							6
MSTRG.34506|ankk1	ssa20: 46309838-46320926	BLASTx	Ankyrin repeat and protein kinase domain-containing protein 1 [Homo sapiens]		ANKK1	-1.07808							6
MSTRG.35045|LOC106591008	ssa20: 74910755-75446148	Stringtie	calsyntenin-2-like(LOC106591008) [Salmo salar]	LOC106591008	CLSTN2	-1.07996							6
MSTRG.6349	ssa03: 67614152-67648439	BLASTn	paralemmin-1 [Salvelinus alpinus]		PALM	-1.07997							6
MSTRG.35058	ssa20: 76028854-76225390	BLASTn	uncharacterized LOC106581352 [Salmo salar]	LOC106581352	--	-1.08266							6
MSTRG.22355	ssa13: 896521-899799	BLASTx	Probable RNA-directed DNA polymerase from transposon BS [Drosophila melanogaster]		--	-1.0834							6
MSTRG.18390	ssa10: 109565526-109576846	BLASTn	glutaminase liver isoform, mitochondrial (LOC106571948), transcript variant X2, mRNA [Salmo salar]	LOC106571948	GLS2	-1.08458							6
MSTRG.7479|LOC106602344	ssa04: 14053972-14101528	Stringtie	hedgehog-interacting protein-like(LOC106602344) [Salmo salar]	LOC106602344	HHIP	-1.08686							6
MSTRG.11152	ssa06: 20753524-20760590	BLASTx	Zinc finger BED domain-containing protein 5 [Homo sapiens]		ZBED5	-1.0873							6
MSTRG.40133	ssa26: 32527325-32645153	BLASTx	Fibroblast growth factor 7 [Canis lupus familiaris]		FGF7	-1.08837	-1.20352						6
MSTRG.40056|LOC100136916	ssa26: 27109761-27113893	Stringtie|BLASTx	cytochrome P450 1A(LOC100136916) [Salmo salar]	LOC100136916	CYP1A1	-1.08942		-1.07313					6
MSTRG.22502	ssa13: 10778139-10915291	BLASTx	Myelin transcription factor 1 [Mus musculus]		MYT1	-1.09258							6
MSTRG.36399|LOC123723999	ssa22: 22503489-22544226	BLASTx	Sushi, von Willebrand factor type A, EGF and pentraxin domain-containing protein 1 [Rattus norvegicus]		SVEP1	-1.09306							6
MSTRG.38926|LOC106586153	ssa25: 11092918-11119091	Stringtie	protein Wnt-10a-like(LOC106586153) [Salmo salar]	LOC106586153	WNT10A	-1.09394							6
MSTRG.6990	ssa03: 95923645-95931414	BLASTn	uncharacterized si:ch211-76l23.4 [Salvelinus fontinalis]		--	-1.0951							6
MSTRG.30661	ssa17: 58873658-58880816	BLASTn	zinc finger protein 239-like [Salvelinus fontinalis]		ZNF239	-1.09528		-1.1503					6
MSTRG.40367	ssa26: 47866790-47872156	BLASTx	Transposon TX1 uncharacterized 149 kDa protein [Xenopus laevis]		--	-1.09538							6
MSTRG.7458|LOC106602338	ssa04: 13007019-13030803	Stringtie|BLASTx	broad substrate specificity ATP-binding cassette transporter ABCG2-like(LOC106602338) [Salmo salar]	LOC106602338	ABCG2	-1.0972							6
MSTRG.25688|kcng2	ssa14: 70481013-70513479	Stringtie	potassium voltage-gated channel, subfamily G, member 2(kcng2) [Salmo salar]	kcng2	KCNG2	-1.09779		-1.05079					6
MSTRG.35932|LOC106582430	ssa21: 48704882-48708885	Stringtie	claudin-10(LOC106582430) [Salmo salar]	LOC106582430	CLDN10	-1.0988							6
MSTRG.22281	ssa12: 97051451-97052237	BLASTn	coiled-coil domain-containing protein 71-like (LOC129861068), transcript variant X2, mRNA [Salvelinus fontinalis]		CCDC71	-1.09991							6
MSTRG.15324|LOC106611680	ssa09: 67301402-67314269	Stringtie	NADH dehydrogenase [ubiquinone] iron-sulfur protein 8, mitochondrial-like(LOC106611680) [Salmo salar]	LOC106611680	NDUFS8	-1.10307							6
MSTRG.12182|LOC106607876	ssa06: 66854425-66879296	Stringtie|BLASTx	adhesion G protein-coupled receptor F5(LOC106607876) [Salmo salar]	LOC106607876	ADGRF5	-1.10559							6
MSTRG.13323|LOC106609210	ssa07: 39261670-39315804	Stringtie	receptor-type tyrosine-protein phosphatase zeta-like(LOC106609210) [Salmo salar]	LOC106609210	PTPRZ1	-1.10597							6
MSTRG.33487	ssa19: 67475039-67502710	BLASTx	Inhibitor of nuclear factor kappa-B kinase subunit alpha [Danio rerio]		CHUK	-1.10635							6
MSTRG.8225|cxb1	ssa04: 48151793-48154027	Stringtie	Gap junction beta-1 protein(cxb1) [Salmo salar]	cxb1	GJB1	-1.10736							6
MSTRG.41775|lhcgr	ssa28: 22367093-22387145	Stringtie|BLASTx	luteinizing hormone/choriogonadotropin receptor(lhcgr) [Salmo salar]	lhcgr	LHCGR	-1.10766		-1.01803					6
MSTRG.24599|LOC106568924	ssa14: 14241549-14247997	Stringtie	T-cell acute lymphocytic leukemia protein 1-like(LOC106568924) [Salmo salar]	LOC106568924	TAL1	-1.11169							6
MSTRG.26336	ssa15: 8911887-8986191	BLASTx	Atrial natriuretic peptide receptor 3 [Mus musculus]		NPR3	-1.11232	-1.04147						6
MSTRG.35109	ssa20: 82085325-82087048	BLASTn	gamma-crystallin C-like [Salmo salar]	crygc	CRYGC	-1.11638							6
MSTRG.24246|LOC106568549	ssa13: 109652965-109803180	Stringtie	metalloprotease TIKI1 [Salmo salar]	trabd2a	TRABD2A	-1.11775							6
LOC106590344|LOC106590344	ssa29: 21381383-21391711	Stringtie	transmembrane protein 200C-like(LOC106590344) [Salmo salar]	LOC106590344	TMEM200C	-1.12105							6
MSTRG.34506	ssa20: 46309838-46320926	BLASTx	Ankyrin repeat and protein kinase domain-containing protein 1 [Homo sapiens]		ANKK1	-1.12335							6
MSTRG.5451	ssa03: 25652491-25707239	BLASTx	E3 ubiquitin-protein ligase RNF152 [Homo sapiens]		RNF152	-1.12356		-1.10405					6
MSTRG.30010	ssa17: 20801869-20840689	BLASTn	uncharacterized LOC106598830 (LOC106598830), ncRNA [Salmo salar]	LOC106598830	--	-1.12585							6
MSTRG.21011|LOC106564615	ssa12: 24455186-24491601	Stringtie	multidrug resistance-associated protein 1-like [Salmo salar]	abcc1	ABCC1	-1.12653							6
LOC106579924|LOC106579924	ssa20: 21121709-21181790	Stringtie	rasGAP-activating-like protein 1(LOC106579924) [Salmo salar]	LOC106579924	RASAL1	-1.12742							6
MSTRG.32892	ssa19: 32036393-32051545	BLASTx	DNA endonuclease RBBP8 [Xenopus laevis]		RBBP8	-1.12746							6
MSTRG.44790	NW_025548482.1: 18591-26327	BLASTx	Rab3 GTPase-activating protein catalytic subunit [Danio rerio]		RAB3GAP1	-1.12777							6
MSTRG.39660|brsk2b	ssa26: 7130644-7331068	Stringtie	BR serine/threonine kinase 2b(brsk2b) [Salmo salar]	brsk2b	BRSK2B	-1.12777							6
MSTRG.33269|ccdc189	ssa19: 56892908-56944669	Stringtie	coiled-coil domain containing 189 (ccdc189) [Salmo salar]	ccdc189	CCDC189	-1.12796						-1.0495	6
MSTRG.36822	ssa22: 43306245-43334130	BLASTx	Probable RNA-directed DNA polymerase from transposon BS [Drosophila melanogaster]		--	-1.12837			-1.0436				6
MSTRG.3989|LOC106587409	ssa02: 57214780-57219040	Stringtie	lysozyme g-like(LOC106587409) [Salmo salar]	LOC106587409	LYG1	-1.1285							6
MSTRG.31463	ssa18: 18237501-18248321	BLASTn	uncharacterized LOC115193785 [Salmo trutta]		--	-1.1349							6
MSTRG.21366	ssa12: 39831839-39880589	BLASTx	CMP-N-acetylneuraminate-beta-galactosamide-alpha-2,3-sialyltransferase 2 [Mus musculus]		ST3GAL2	-1.14049							6
MSTRG.12330|LOC106608077	ssa06: 75559779-75588620	Stringtie	galectin-3-like(LOC106608077) [Salmo salar]	LOC106608077	LGALS3	-1.14381							6
LOC106562326|LOC106562326	ssa11: 24895776-24999481	Stringtie	synaptotagmin-7-like(LOC106562326) [Salmo salar]	LOC106562326	SYT7	-1.14387							6
MSTRG.12194|LOC106607921	ssa06: 67192269-67196826	Stringtie	cdc42 effector protein 3(LOC106607921) [Salmo salar]	LOC106607921	CDC42EP3	-1.14393							6
MSTRG.28832|LOC106574087	ssa16: 48742127-48745650	Stringtie	carboxypeptidase N subunit 2(LOC106574087) [Salmo salar]	LOC106574087	CPN2	-1.14461							6
MSTRG.38785|LOC100136466	ssa24: 45109162-45121903	Stringtie	follistatin(LOC100136466) [Salmo salar]	LOC100136466	FST	-1.14557							6
MSTRG.8130|LOC106603141	ssa04: 42673959-42682136	Stringtie	potassium channel subfamily K member 4-like(LOC106603141) [Salmo salar]	LOC106603141	KCNK4	-1.14836							6
MSTRG.27088|otofa	ssa15: 55530512-55679585	Stringtie	otoferlin a(otofa) [Salmo salar]	otofa	OTOFA	-1.15188							6
MSTRG.35810	ssa21: 37038808-37044358	BLASTx	Transposable element Tc1 transposase [Caenorhabditis elegans]		--	-1.15262							6
MSTRG.2635	ssa01: 172686387-172777624	BLASTx	Lysophosphatidic acid receptor 1 [Mus musculus]		LPAR1	-1.15298							6
MSTRG.16684|LOC106613322	ssa09: 154037869-154111014	Stringtie|BLASTx	collagen alpha-1(XXVI) chain-like(LOC106613322) [Salmo salar]	LOC106613322	COL26A1	-1.15359							6
MSTRG.30087|igfbp-2a	ssa17: 23891467-24109214	Stringtie	IGF binding protein 2(igfbp-2a) [Salmo salar]	igfbp-2a	IGFBP-2A	-1.15378							6
MSTRG.34493|mmp28	ssa20: 45240586-45286173	Stringtie|BLASTx	matrix metallopeptidase 28(mmp28) [Salmo salar]	mmp28	MMP28	-1.15397							6
MSTRG.8963|LOC106604090	ssa05: 1043737-1057131	Stringtie	Uncharacterized LOC106604090 [Salmo salar]	LOC106604090	--	-1.15427							6
MSTRG.8544	ssa04: 64703595-64764253	Stringtie|BLASTx	endothelial cell-selective adhesion molecule(LOC106603670) [Salmo salar]	LOC106603670	IGSF11	-1.15492							6
MSTRG.7799|sfrp2	ssa04: 27927198-27930326	Stringtie	secreted frizzled-related protein 2(sfrp2) [Salmo salar]	sfrp2	SFRP2	-1.15908							6
MSTRG.3681|LOC123729551	ssa02: 42300850-42320023	Stringtie|BLASTx	uncharacterized LOC123729551(LOC123729551) [Salmo salar]	LOC123729551	CEP85	-1.16018							6
MSTRG.16073|LOC106612701	ssa09: 118344265-118366004	Stringtie|BLASTx	neuroblast differentiation-associated protein AHNAK-like(LOC106612701) [Salmo salar]	LOC106612701	AHNAK	-1.16034							6
slc4a8|slc4a8	ssa22: 32160812-32212459	Stringtie	solute carrier family 4 member 8(slc4a8) [Salmo salar]	slc4a8	SLC4A8	-1.16254	-1.1293	-1.10449					6
MSTRG.15322|LOC106611683	ssa09: 67204437-67276289	Stringtie	P2X purinoceptor 3-like(LOC106611683) [Salmo salar]	LOC106611683	P2RX3	-1.16808					-1.24011		6
MSTRG.9263|shisa3	ssa05: 21745671-21755299	Stringtie	shisa family member 3(shisa3) [Salmo salar]	shisa3	SHISA3	-1.16815							6
MSTRG.15842|LOC106612310	ssa09: 98655395-98720112	Stringtie|BLASTx	RING finger protein 44-like(LOC106612310) [Salmo salar]	LOC106612310	RNF44	-1.17137							6
MSTRG.40904	ssa27: 18168601-18172786	BLASTx	RNA-directed DNA polymerase from mobile element jockey [Drosophila melanogaster]		--	-1.17166							6
MSTRG.15933	ssa09: 110311496-110394301	BLASTx	EEF1AKMT4-ECE2 readthrough transcript protein [Homo sapiens]		EEF1AKMT4-ECE2	-1.17179							6
MSTRG.10732|LOC123724060	ssa05: 90604993-90700837	Stringtie|BLASTx	oxysterol-binding protein-related protein 10-like(LOC123724060) [Salmo salar]	LOC123724060	OSBPL10	-1.17432							6
MSTRG.42689	NW_025547040.1: 2759-6116	BLASTn	uncharacterized LOC116360633 [Oncorhynchus kisutch]		--	-1.17582							6
MSTRG.3912|LOC100380664	ssa02: 54958108-54971084	Stringtie	cytoglobin-2(LOC100380664) [Salmo salar]	LOC100380664	CYGB	-1.17758							6
MSTRG.39324	ssa25: 36124610-36154353	BLASTx	Endoplasmic reticulum membrane adapter protein XK [Pan troglodytes]		XK	-1.17776							6
MSTRG.27254	ssa15: 67153276-67165651	BLASTx	Zinc finger MYM-type protein 6 [Homo sapiens]		ZMYM6	-1.18145							6
MSTRG.9626|LOC106604929	ssa05: 41630760-41672919	Stringtie	alpha-1A adrenergic receptor-like [Salmo salar]	adra1a	ADRA1A	-1.18263							6
MSTRG.22351	ssa13: 646982-648075	BLASTn	uncharacterized LOC127930055 (LOC127930055), mRNA [Oncorhynchus keta]		--	-1.18276							6
MSTRG.38520	ssa24: 27616287-27628144	BLASTx	Sushi domain-containing protein 1 [Homo sapiens]		SUSD1	-1.18393							6
MSTRG.43411	NW_025547706.1: 246166-255147	BLASTx	E3 ubiquitin/ISG15 ligase TRIM25 [Homo sapiens]		TRIM25	-1.18439							6
MSTRG.35930|LOC106582442	ssa21: 48527708-48530808	Stringtie	transcription factor Sox-21-B-like(LOC106582442) [Salmo salar]	LOC106582442	SOX21	-1.18484							6
MSTRG.15726	ssa09: 88740057-88747674	BLASTx	Beta-2 adrenergic receptor [Oncorhynchus mykiss]		ADRB2	-1.18663							6
MSTRG.34655	ssa20: 52945508-52948642	No BLAST hit	--		--	-1.18705							6
MSTRG.21119|LOC106564735	ssa12: 30208125-30211449	Stringtie	uncharacterized LOC106564735(LOC106564735) [Salmo salar]	LOC106564735	--	-1.18818							6
MSTRG.14674	ssa09: 19092725-19100548	BLASTx	Cytochrome P450 1B1 [Homo sapiens]		CYP1B1	-1.19473							6
MSTRG.9647	ssa05: 42922525-42934073	BLASTx	Transposable element Tcb1 transposase [Caenorhabditis briggsae]		--	-1.19886							6
LOC106575807|LOC106575807	ssa16: 82382553-82408384	Stringtie	voltage-dependent L-type calcium channel subunit beta-4-like(LOC106575807) [Salmo salar]	LOC106575807	LOC106571945	-1.19905				-1.28286			6
MSTRG.37604	ssa23: 32596407-32635630	BLASTx	Phospholipid-transporting ATPase IK [Mus musculus]		ATP8B3	-1.19983							6
MSTRG.38811	ssa24: 46569162-46632399	BLASTx	Atrial natriuretic peptide receptor 3 [Rattus norvegicus]		NPR3	-1.20066							6
MSTRG.35841|LOC106582350	ssa21: 40773411-41098671	Stringtie	semaphorin-5B(LOC106582350) [Salmo salar]	LOC106582350	SEMA5B	-1.20337		-1.06185		-1.03869			6
MSTRG.5457	ssa03: 26411381-26414484	BLASTx	Transposable element Tc1 transposase [Caenorhabditis elegans]		--	-1.20568							6
MSTRG.16198|fa70b	ssa09: 123029183-123063282	Stringtie	FAM70B(fa70b) [Salmo salar]	fa70b	TMEM255B	-1.20602							6
MSTRG.9034	ssa05: 8197031-8209169	BLASTx	Glutathione peroxidase 3 [Mus musculus]		GPX3	-1.20908							6
MSTRG.46981	NW_025550442.1: 157781-220864	BLASTx	Prickle-like protein 1 [Xenopus tropicalis]		PRICKLE1	-1.20936							6
MSTRG.29354	ssa16: 78597197-78610402	BLASTx	Sodium/potassium-transporting ATPase subunit beta-1 [Sus scrofa]		ATP1B1	-1.21157							6
MSTRG.27292	ssa15: 68802665-68803863	BLASTn	uncharacterized LOC127930055 (LOC127930055), mRNA [Oncorhynchus keta]		--	-1.21369							6
MSTRG.4107|LOC106589417	ssa02: 63398893-63419399	Stringtie	neuronal-specific septin-3(LOC106589417) [Salmo salar]	LOC106589417	SEPTIN3	-1.21383							6
MSTRG.35806	ssa21: 36500779-36520599	BLASTx	Protein HEG [Danio rerio]		HEG1	-1.21599	-1.02526						6
MSTRG.47422	NW_025550946.1: 159951-170245	BLASTx	RNA-directed DNA polymerase from mobile element jockey [Drosophila melanogaster]		--	-1.21706							6
MSTRG.22694	ssa13: 21923545-21936710	BLASTx	Cytosolic sulfotransferase 3 [Danio rerio]		CHST3	-1.21796	-1.07112						6
MSTRG.16952	ssa10: 16041082-16056111	BLASTx	Mitotic interactor and substrate of PLK1 [Pongo abelii]		MISP	-1.22101							6
MSTRG.40138|LOC123730826	ssa26: 33010609-33027597	Stringtie	sodium/potassium/calcium exchanger 5-like [Salmo salar]	slc24a5	SLC24A5	-1.22265	-1.02607						6
MSTRG.14105	ssa08: 15305199-15322412	BLASTx	Broad substrate specificity ATP-binding cassette transporter ABCG2 [Bos taurus]		ABCG2	-1.22331				-1.8366			6
MSTRG.16065	ssa09: 118120752-118199855	Stringtie|BLASTx	latent-transforming growth factor beta-binding protein 4(LOC106612711) [Salmo salar]	LOC106612711	LTBP4	-1.22362							6
MSTRG.24760|LOC106569077	ssa14: 22832605-22875842	Stringtie|BLASTx	tenascin-N(LOC106569077) [Salmo salar]	LOC106569077	TNN	-1.22368							6
MSTRG.31255|LOC106576851	ssa18: 5884630-5915941	Stringtie	zinc finger DHHC-type palmitoyltransferase 16(LOC106576851) [Salmo salar]	LOC106576851	ZDHHC16	-1.22492			-1.19966				6
MSTRG.2299|LOC106568667	ssa01: 153194729-153435374	Stringtie|BLASTx	laminin subunit gamma-3(LOC106568667) [Salmo salar]	LOC106568667	LAMC3	-1.23026							6
MSTRG.45924	NW_025549206.1: 130277-134680	BLASTx	Tripartite motif-containing protein 16 [Homo sapiens]		TRIM16	-1.23089							6
MSTRG.22720	ssa13: 23410195-23411927	BLASTx	Microtubule-actin cross-linking factor 1, isoforms 6/7 [Homo sapiens]		MACF1	-1.23092							6
MSTRG.40020	ssa26: 25554991-25729583	BLASTx	Pleckstrin homology domain-containing family A member 7 [Danio rerio]		PLEKHA7	-1.23459							6
LOC106568821|LOC106568821	ssa14: 20132234-20281432	Stringtie	receptor-type tyrosine-protein phosphatase N2(LOC106568821) [Salmo salar]	LOC106568821	PTPRN2	-1.23463		-1.011		-1.41853			6
MSTRG.5593|LOC106600430	ssa03: 34734420-34754518	Stringtie	phospholipase ABHD3 [Salmo salar]	abhd3	ABHD3	-1.23533							6
MSTRG.39017|LOC100137092	ssa25: 16488327-16491482	Stringtie	dopachrome tautomerase-like(LOC100137092) [Salmo salar]	LOC100137092	DCT	-1.23824							6
MSTRG.35926|LOC106582440	ssa21: 48300647-48461234	Stringtie	glypican-6(LOC106582440) [Salmo salar]	LOC106582440	GPC6	-1.23943	-1.14999						6
MSTRG.2747	ssa02: 6636537-6651597	BLASTx	Partitioning defective 6 homolog gamma [Mus musculus]		PARD6G	-1.24466							6
MSTRG.40458	ssa26: 53447427-53449432	BLASTx	Snake venom metalloprotease inhibitor 02D01 [Echis ocellatus]		--	-1.25101							6
MSTRG.33258	ssa19: 56658722-56672169	BLASTx	Transposable element Tcb1 transposase [Caenorhabditis briggsae]		--	-1.25325		-1.38037					6
MSTRG.1546	ssa01: 108872845-108881667	BLASTx	Transmembrane protein 26 [Homo sapiens]		TMEM26	-1.25333							6
MSTRG.19104	ssa11: 26744245-26749705	Stringtie|BLASTx	cytochrome P450 1A(LOC100136926) [Salmo salar]	LOC100136926	CYP1A3	-1.2547	-1.06722						6
MSTRG.42907	NW_025547350.1: 1007-40221	BLASTx	Protein Fe65 homolog [Caenorhabditis elegans]		APBB1	-1.25684							6
MSTRG.12227|LOC106607929	ssa06: 68508054-68558087	Stringtie	potassium channel subfamily K member 2(LOC106607929) [Salmo salar]	LOC106607929	KCNK2	-1.25732							6
MSTRG.35477|LOC106581759	ssa21: 16781169-16842744	Stringtie	rap guanine nucleotide exchange factor 4(LOC106581759) [Salmo salar]	LOC106581759	RAPGEF4	-1.25771							6
MSTRG.25176|LOC106569573	ssa14: 42637413-42663967	Stringtie	Junctional protein associated with coronary artery disease homolog [Salmo salar]	jcad	JCAD	-1.25859							6
LOC106581401|LOC106581401	ssa20: 84349223-84355675	Stringtie	SLIT and NTRK-like protein 3(LOC106581401) [Salmo salar]	LOC106581401	SLITRK3	-1.26005							6
MSTRG.46072	NW_025549428.1: 9517-15339	BLASTx	Protein PRQFV-amide [Aplysia californica]		--	-1.26195							6
LOC106566936|LOC106566936	ssa01: 141898503-141908473	Stringtie	T-box transcription factor TBX3(LOC106566936) [Salmo salar]	LOC106566936	TBX3	-1.2623							6
MSTRG.10021	ssa05: 62095374-62099699	BLASTn	uncharacterized LOC106605440 [Salmo salar]	LOC106605440	--	-1.268							6
MSTRG.19264|LOC106562609	ssa11: 37319250-37347154	Stringtie|BLASTx	ceramide synthase 2(LOC106562609) [Salmo salar]	LOC106562609	CERS2	-1.26981		-1.18625					6
MSTRG.20993|LOC106564541	ssa12: 23873551-23898732	Stringtie|BLASTx	neuronal-specific septin-3-like(LOC106564541) [Salmo salar]	LOC106564541	SEPTIN3	-1.27279							6
MSTRG.14080|LOC106610218	ssa08: 14242301-14287105	Stringtie	hedgehog-interacting protein [Salmo salar]	hhip	HHIP	-1.2743							6
MSTRG.45745	NW_025549107.1: 86820-87552	BLASTn	uncharacterized LOC129841357 [Salvelinus fontinalis]		--	-1.27449							6
MSTRG.30391	ssa17: 39475129-39539940	BLASTx	Tudor domain-containing protein 3 [Gallus gallus]		TDRD3	-1.27504							6
MSTRG.35811|LOC106582203	ssa21: 37044539-37280859	Stringtie	receptor tyrosine-protein kinase erbB-4 [Salmo salar]	erbb4	ERBB4	-1.27528							6
MSTRG.843	ssa01: 50455297-50456666	BLASTn	volume-regulated anion channel subunit LRRC8C-like [Oncorhynchus kisutch]		LRRC8C	-1.27931				-1.067			6
MSTRG.47141|LOC123740014	NW_025550780.1: 3611-15375	Stringtie	rab-3A-interacting protein-like [Salmo salar]	rab3ip	RAB3IP	-1.29318		-1.29013					6
MSTRG.32272|LOC123728669	ssa18: 73219615-73221803	Stringtie|BLASTx	putative ferric-chelate reductase 1(LOC123728669) [Salmo salar]	LOC123728669	FRRS1	-1.29369							6
MSTRG.17083|creb3l3a	ssa10: 21759854-21767456	Stringtie	cAMP responsive element binding protein 3-like 3a(creb3l3a) [Salmo salar]	creb3l3a	CREB3L3A	-1.29598		-1.22907					6
LOC106592716|LOC106592716	ssa12: 2593939-2639496	Stringtie	voltage-dependent T-type calcium channel subunit alpha-1H-like(LOC106592716) [Salmo salar]	LOC106592716	LOC106590977	-1.29633							6
MSTRG.8600|LOC106603725	ssa04: 68488775-68534295	Stringtie	ceramide synthase(LOC106603725) [Salmo salar]	LOC106603725	CERS3	-1.29759	-1.03389						6
MSTRG.24395|LOC106568692	ssa14: 7636924-7695157	Stringtie	MAGUK p55 subfamily member 7(LOC106568692) [Salmo salar]	LOC106568692	MPP7	-1.29903							6
LOC106561157|LOC106561157	ssa01: 130382058-130458831	Stringtie	ras-specific guanine nucleotide-releasing factor 2(LOC106561157) [Salmo salar]	LOC106561157	RASGRF2	-1.30065							6
MSTRG.11524|epor	ssa06: 34266828-34272171	Stringtie	erythropoietin receptor(epor) [Salmo salar]	epor	EPOR	-1.30564							6
MSTRG.32475	ssa18: 81328009-81347433	BLASTx	Endonuclease domain-containing 1 protein [Mus musculus]		ENDOD1	-1.30848							6
MSTRG.5844	ssa03: 47916657-47946917	Stringtie|BLASTx	solute carrier family 26 member 6-like(LOC106600630) [Salmo salar]	LOC106600630	SLC26A6	-1.31198	-1.40579	-1.60688		-1.89093			6
MSTRG.27911	ssa15: 99288161-99306045	BLASTx	LINE-1 reverse transcriptase homolog [Nycticebus coucang]		--	-1.31336							6
MSTRG.24582|LOC106568942	ssa14: 13394662-13417233	Stringtie	ceramide synthase 2(LOC106568942) [Salmo salar]	LOC106568942	CERS2	-1.32536							6
MSTRG.15916|irg1l	ssa09: 107637926-107649732	Stringtie|BLASTx	immunoresponsive gene 1, like(irg1l) [Salmo salar]	irg1l	ACOD1	-1.32704				-1.06424			6
MSTRG.5845	ssa03: 47939445-47941279	BLASTn	uncharacterized LOC112238298 [Oncorhynchus tshawytscha]		--	-1.33017	-1.71769						6
MSTRG.6034	ssa03: 57313301-57336698	BLASTx	Oxysterol-binding protein-related protein 6 [Mus musculus]		OSBPL6	-1.33023	-1.25258						6
MSTRG.19027	ssa11: 21968885-21975277	BLASTx	Forkhead box C1-A [Danio rerio]		FOXC1	-1.33251							6
MSTRG.47446	NW_025550954.1: 74494-82615	No BLAST hit	--		--	-1.33602							6
MSTRG.17644|LOC106594307	ssa10: 55550795-55794630	Stringtie	sushi, nidogen and EGF-like domain-containing protein 1(LOC106594307) [Salmo salar]	LOC106594307	LOC106587888	-1.33616							6
MSTRG.5187	ssa03: 12906589-12932883	BLASTx	Agouti-related protein [Homo sapiens]		AGRP	-1.34137			-1.2642				6
MSTRG.27381	ssa15: 73757591-73758642	BLASTn	uncharacterized LOC127912792 (LOC127912792), transcript variant X11, ncRNA [Oncorhynchus keta]		--	-1.34145							6
MSTRG.22694|st1s3	ssa13: 21923545-21936710	BLASTx	Cytosolic sulfotransferase 3 [Danio rerio]		CHST3	-1.34509		-1.32111					6
MSTRG.10509	ssa05: 78002743-78043701	BLASTx	Epithelial splicing regulatory protein 1 [Danio rerio]		ESRP1	-1.34661							6
MSTRG.1488|col9a1b	ssa01: 103480174-103512804	Stringtie	collagen, type IX, alpha 1b(col9a1b) [Salmo salar]	col9a1b	COL9A1B	-1.34839	-1.70279			-2.13604			6
MSTRG.37846|tph1a	ssa23: 45940783-45953419	Stringtie	tryptophan hydroxylase 1 (tryptophan 5-monooxygenase) a(tph1a) [Salmo salar]	tph1a	TPH1	-1.34941							6
MSTRG.1264|gprc5c	ssa01: 83682008-83698171	Stringtie	G protein-coupled receptor, class C, group 5, member C(gprc5c) [Salmo salar]	gprc5c	GPRC5C	-1.35196							6
MSTRG.26257	ssa15: 3550511-3556118	BLASTn	uncharacterized LOC123727190 [Salmo salar]	LOC123727190	--	-1.352							6
MSTRG.39143|heg1	ssa25: 26306231-26368151	Stringtie	heart development protein with EGF-like domains 1(heg1) [Salmo salar]	heg1	HEG1	-1.35553							6
MSTRG.30533|LOC106576037	ssa17: 51644495-51656637	Stringtie	UPF0606 protein KIAA1549-like(LOC106576037) [Salmo salar]	LOC106576037	KIAA1549	-1.35679							6
MSTRG.34721|LOC106580873	ssa20: 56104301-56145643	Stringtie|BLASTx	huntingtin-interacting protein 1(LOC106580873) [Salmo salar]	LOC106580873	HIP1	-1.35766							6
MSTRG.19103	ssa11: 26731586-26745626	BLASTn	uncharacterized LOC129854431 [Salvelinus fontinalis]		--	-1.35984	-1.42856	-1.4438					6
MSTRG.23775	ssa13: 83765922-83784359	BLASTx	Arf-GAP with Rho-GAP domain, ANK repeat and PH domain-containing protein 1 [Homo sapiens]		ARAP1	-1.36379							6
MSTRG.18194|LOC106561238	ssa10: 94741049-94750950	Stringtie	carnitine O-palmitoyltransferase 1, liver isoform [Salmo salar]	cpt1a	CPT1A	-1.36418							6
MSTRG.39275|LOC106586625	ssa25: 33172508-33197179	Stringtie	atypical chemokine receptor 3 [Salmo salar]	ackr3	ACKR3	-1.365							6
MSTRG.19183	ssa11: 32744746-32757663	BLASTx	RNA-directed DNA polymerase from mobile element jockey [Drosophila melanogaster]		--	-1.36895		-1.01859					6
MSTRG.4416	ssa02: 73237503-73241572	BLASTn	uncharacterized LOC106592151 [Salmo salar]	LOC106592151	--	-1.3693							6
MSTRG.10407	ssa05: 76150950-76216943	BLASTx	Transposon TX1 uncharacterized 149 kDa protein [Xenopus laevis]		--	-1.3695							6
MSTRG.4322	ssa02: 70670410-70704352	BLASTx	Fc receptor-like protein 5 [Homo sapiens]		FCRL5	-1.36997							6
MSTRG.4469|LOC106592810	ssa02: 74996030-75007804	Stringtie	basement membrane-specific heparan sulfate proteoglycan core protein-like(LOC106592810) [Salmo salar]	LOC106592810	HSPG2	-1.37143							6
MSTRG.4089|LOC106588920	ssa02: 62739435-62774763	Stringtie	multidrug resistance-associated protein 1(LOC106588920) [Salmo salar]	LOC106588920	SLC5A7	-1.37348							6
MSTRG.37314|LOC106584062	ssa23: 11639841-11666998	Stringtie	cytochrome P450 2J2-like(LOC106584062) [Salmo salar]	LOC106584062	CYP2J2	-1.38985							6
MSTRG.3911|LOC106588249	ssa02: 54947142-54955307	Stringtie	uncharacterized LOC106588249(LOC106588249) [Salmo salar]	LOC106588249	--	-1.40433							6
MSTRG.35571|LOC106581954	ssa21: 23002929-23023997	Stringtie|BLASTx	UDP-glucuronosyltransferase(LOC106581954) [Salmo salar]	LOC106581954	UGT3A1	-1.40888							6
MSTRG.266|LOC106564204	ssa01: 13601401-13621021	Stringtie	saposin-C-like(LOC106564204) [Salmo salar]	LOC106564204	PSAP	-1.41019							6
MSTRG.430|LOC106583171	ssa01: 25277489-25280692	Stringtie	cytochrome P450 1B1-like [Salmo salar]	cyp1b1	CYP1B1	-1.4181		-1.42146					6
MSTRG.19703	ssa11: 73293945-73298520	BLASTn	uncharacterized LOC106563021 [Salmo salar]	LOC106563021	--	-1.42291				-1.13751			6
MSTRG.31311|LOC106576803	ssa18: 8475300-8479568	Stringtie	cytochrome P450 1B1-like(LOC106576803) [Salmo salar]	LOC106576803	CYP1B1	-1.42347	-1.09617	-1.18463					6
MSTRG.29693|LOC123728133	ssa17: 3489983-3501401	Stringtie	carnitine O-palmitoyltransferase 1, liver isoform-like [Salmo salar]	cpt1a	CPT1A	-1.42465							6
LOC106603333|LOC106603333	ssa04: 49883662-49899723	Stringtie	cyclic nucleotide gated channel subunit alpha 2 [Salmo salar]	cnga2	CNGA2	-1.4305							6
MSTRG.33058|LOC106593585	ssa19: 47522462-47529774	Stringtie	endothelial PAS domain-containing protein 1(LOC106593585) [Salmo salar]	LOC106593585	EPAS1	-1.43073							6
MSTRG.429|LOC106583235	ssa01: 25273027-25275859	Stringtie	Cytochrome P450 1B1-like [Salmo salar]	cyp1b1	CYP1B1	-1.43408		-1.58557					6
MSTRG.2653	ssa02: 24706-28956	BLASTx	Protein LRATD2 [Homo sapiens]		LRATD2	-1.43983							6
LOC106591876|LOC106591876	ssa14: 50126980-50394862	Stringtie	Piezo-type mechanosensitive ion channel component 2 (LOC106591876) [Salmo salar]	LOC106591876	PIEZO2	-1.44954	-1.00547	-1.4624		-1.07557			6
MSTRG.22832|LOC106566818	ssa13: 28823564-28853519	Stringtie	solute carrier family 2, facilitated glucose transporter member 1(LOC106566818) [Salmo salar]	LOC106566818	SLC2A1	-1.45017							6
MSTRG.35025	ssa20: 73094737-73101867	BLASTx	Uncharacterized threonine-rich GPI-anchored glycoprotein PJ4664.02 [Schizosaccharomyces pombe 972h-]		--	-1.45047				-1.27976			6
MSTRG.27911|LOC106572811	ssa15: 99288161-99306045	BLASTx	LINE-1 reverse transcriptase homolog [Nycticebus coucang]		--	-1.45984							6
MSTRG.13868|LOC106609958	ssa08: 4476883-4481435	Stringtie	probable G-protein coupled receptor 83(LOC106609958) [Salmo salar]	LOC106609958	GPR83	-1.4705							6
MSTRG.38808	ssa24: 46554868-46556982	BLASTx	Probable RNA-directed DNA polymerase from transposon BS [Drosophila melanogaster]		--	-1.47137							6
MSTRG.41357|LOC106589269	ssa28: 748789-772710	Stringtie	chondroadherin-like(LOC106589269) [Salmo salar]	LOC106589269	CHAD	-1.48285							6
MSTRG.33999	ssa20: 18375251-18407898	BLASTx	Collagen alpha-1(XXIV) chain [Homo sapiens]		COL24A1	-1.50466							6
MSTRG.42063|LOC106590054	ssa29: 5411481-5458151	Stringtie	cadherin-10(LOC106590054) [Salmo salar]	LOC106590054	CDH10	-1.51239							6
MSTRG.14112	ssa08: 15448158-15457198	BLASTn	hemogen-like [Salmo salar]	hemgn	HEMGN	-1.5158							6
MSTRG.28791|LOC106574039	ssa16: 46873393-46878955	Stringtie	T-cell acute lymphocytic leukemia protein 1 homolog(LOC106574039) [Salmo salar]	LOC106574039	TAL1	-1.51776							6
MSTRG.37558|LOC106584384	ssa23: 30552523-30584699	Stringtie	procollagen galactosyltransferase 2(LOC106584384) [Salmo salar]	LOC106584384	COLGALT2	-1.5251							6
MSTRG.7506|LOC106602386	ssa04: 16390296-16392500	Stringtie	Heart- and neural crest derivatives-expressed protein 2 [Salmo salar]	hand2	HAND2	-1.52642	-2.23368	-1.37915		-1.30998	-1.85884		6
MSTRG.45436	NW_025548863.1: 30929-40772	BLASTx	GPI-linked NAD(P)(+)--arginine ADP-ribosyltransferase 1 [Homo sapiens]		ART1	-1.52668							6
MSTRG.7798|LOC106602753	ssa04: 27636173-27654856	Stringtie	sodium/hydrogen exchanger 9B2 [Salmo salar]	slc9b2	SLC9B2	-1.53457		-1.8245					6
MSTRG.24691|LOC106568829	ssa14: 19557811-19594818	Stringtie	double-stranded RNA-specific editase B2 [Salmo salar]	adarb2	ADARB2	-1.54114	-1.01979						6
MSTRG.19177	ssa11: 32149949-32187012	BLASTx	Fibroblast growth factor 7 [Canis lupus familiaris]		FGF7	-1.5467	-1.1518						6
MSTRG.6536	ssa03: 74037698-74099901	BLASTx	Transient receptor potential cation channel subfamily M member 4 [Mus musculus]		TRPM4	-1.54971							6
MSTRG.13413	ssa07: 44531935-44533178	BLASTx	Transposable element Tcb1 transposase [Caenorhabditis briggsae]		--	-1.55947							6
MSTRG.28378|cpt1b	ssa16: 23967473-23984946	Stringtie|BLASTx	carnitine palmitoyltransferase 1B (muscle)(cpt1b) [Salmo salar]	cpt1b	CPT1A	-1.56692							6
MSTRG.6445|LOC106580481	ssa03: 70975555-70977121	Stringtie	noggin-3-like(LOC106580481) [Salmo salar]	LOC106580481	NOGG3	-1.5758							6
MSTRG.39607|LOC106587020	ssa26: 2235103-2429843	Stringtie|BLASTx	dematin(LOC106587020) [Salmo salar]	LOC106587020	DMTN	-1.58922							6
MSTRG.4982|LOC106594165	ssa03: 1173026-1194242	Stringtie	vimentin A2-like(LOC106594165) [Salmo salar]	LOC106594165	VIM	-1.59245							6
MSTRG.25506	ssa14: 62238962-62314379	Stringtie|BLASTx	golgin subfamily A member 4-like(LOC106597201) [Salmo salar]	LOC106597201	GOLGA4	-1.61165							6
MSTRG.37150|LOC106583878	ssa23: 674171-681287	Stringtie	Uncharacterized LOC106583878 [Salmo salar]	LOC106583878	--	-1.6244							6
MSTRG.38832|LOC106585999	ssa24: 48437687-48444158	Stringtie|BLASTx	doublesex- and mab-3-related transcription factor 2(LOC106585999) [Salmo salar]	LOC106585999	DMRT2	-1.62604							6
MSTRG.47065	NW_025550568.1: 19587-30331	BLASTn	uncharacterized LOC121579111 (LOC121579111), mRNA [Coregonus clupeaformis]		--	-1.6361							6
MSTRG.16684	ssa09: 154037869-154111014	Stringtie|BLASTx	collagen alpha-1(XXVI) chain-like(LOC106613322) [Salmo salar]	LOC106613322	COL26A1	-1.66252							6
MSTRG.21379	ssa12: 40576376-40656639	BLASTx	RIPOR family member 3 [Danio rerio]		RIPOR3	-1.66532							6
MSTRG.35738|LOC106582188	ssa21: 31875498-32094118	Stringtie	ephrin type-A receptor 6-like(LOC106582188) [Salmo salar]	LOC106582188	EPHA6	-1.68819				-1.632			6
LOC106582631|LOC106582631	ssa22: 1499450-2091031	Stringtie	receptor-type tyrosine-protein phosphatase T(LOC106582631) [Salmo salar]	LOC106582631	PTPRT	-1.7098	-1.07783						6
MSTRG.35807	ssa21: 36528839-36561021	BLASTx	KAT8 regulatory NSL complex subunit 1-like protein [Mus musculus]		KANSL1L	-1.71405							6
bco2a|bco2a	ssa20: 57978738-57984198	Stringtie	beta-carotene oxygenase 2a(bco2a) [Salmo salar]	bco2a	BCO2	-1.71438							6
MSTRG.12136	ssa06: 64291672-64302828	BLASTx	Transposable element Tcb1 transposase [Caenorhabditis briggsae]		--	-1.7184		-1.3613		-1.4888			6
MSTRG.31356	ssa18: 12304837-12347822	BLASTx	E3 ubiquitin-protein ligase UBR2 [Homo sapiens]		UBR2	-1.73765							6
MSTRG.7219	ssa04: 2640025-2738101	BLASTx	G protein-coupled receptor kinase 6 [Mus musculus]		GRK6	-1.77081							6
MSTRG.15224|LOC106611539	ssa09: 59363957-59534623	Stringtie	LIM and calponin homology domains-containing protein 1(LOC106611539) [Salmo salar]	LOC106611539	LIMCH1	-1.83989							6
MSTRG.8067|LOC106603181	ssa04: 40698974-40708827	Stringtie	organic solute transporter subunit alpha(LOC106603181) [Salmo salar]	LOC106603181	SLC51A	-1.8421							6
MSTRG.16716|LOC106613327	ssa09: 155466159-155616602	Stringtie	rho guanine nucleotide exchange factor TIAM1(LOC106613327) [Salmo salar]	LOC106613327	TIAM1	-1.84523							6
MSTRG.8404|LOC106603516	ssa04: 56464282-56621225	Stringtie	transmembrane protein 211-like(LOC106603516) [Salmo salar]	LOC106603516	TMEM211	-1.84771	-1.4621						6
MSTRG.11512	ssa06: 33960583-33977427	BLASTx	Ral guanine nucleotide dissociation stimulator-like 1 [Homo sapiens]		RGL1	-1.8948							6
MSTRG.20972|LOC106564574	ssa12: 23436972-23498449	Stringtie|BLASTx	ral guanine nucleotide dissociation stimulator-like 1(LOC106564574) [Salmo salar]	LOC106564574	SLC44A2	-1.95944							6
MSTRG.32540	ssa18: 83963884-83965840	BLASTn	uncharacterized LOC106593719 (LOC106593719), transcript variant X4, misc_RNA [Salmo salar]	LOC106593719	--	-1.96637							6
MSTRG.25868|LOC106570401	ssa14: 80968586-81175181	Stringtie	focal adhesion kinase 1-like(LOC106570401) [Salmo salar]	LOC106570401	PTK2	-1.97745							6
MSTRG.22021	ssa12: 79151495-79174759	BLASTx	GATA-binding factor C [Drosophila melanogaster]		--	-1.98298							6
MSTRG.1095|LOC106608097	ssa01: 72046773-72068894	Stringtie|BLASTx	sulfotransferase 6B1(LOC106608097) [Salmo salar]	LOC106608097	SULT6B1	-2.02208	-1.84239						6
MSTRG.119|LOC106600501	ssa01: 5205087-5414198	Stringtie	sodium/calcium exchanger 3-like(LOC106600501) [Salmo salar]	LOC106600501	SLC8A3	-2.06283							6
MSTRG.15505	ssa09: 76171552-76173916	BLASTx	Uncharacterized threonine-rich GPI-anchored glycoprotein PJ4664.02 [Schizosaccharomyces pombe 972h-]		--	-2.18091							6
MSTRG.12173|LOC106607861	ssa06: 65983102-66130299	Stringtie|BLASTx	transcription factor 23-like(LOC106607861) [Salmo salar]	LOC106607861	TCF23	-2.38017							6
MSTRG.2055	ssa01: 138479900-138616586	BLASTx	Colorectal mutant cancer protein [Homo sapiens]		MCC	-2.48517							6
MSTRG.22469	ssa13: 9060516-9098485	BLASTx	Synaptophysin-like protein 1 [Mus musculus]		SYPL1	-2.51838							6
MSTRG.829	ssa01: 49589773-49615307	BLASTx	Palmitoyltransferase akr1 [Aspergillus fumigatus Af293]		--	-2.51859				-2.34316			6
MSTRG.41816|LOC106589764	ssa28: 26043417-26061814	Stringtie	Metal transporter CNNM4 [Salmo salar]	cnnm4	CNNM4	-2.54445	-3.38833	-2.51779	-2.64391		-2.54612	-2.13964	6
MSTRG.41817|LOC106589707	ssa28: 26067916-26326044	Stringtie	Inactive heparanase-2 [Salmo salar]	hpse2	HPSE2	-2.54674	-3.40693	-2.63424	-2.54406	-2.10018	-2.37812	-1.95311	6
MSTRG.39367|LOC106595097	ssa25: 38625943-38748486	Stringtie	phospholipid-transporting ATPase IH(LOC106595097) [Salmo salar]	LOC106595097	ATP11A	-2.67904							6
MSTRG.14051|LOC106610170	ssa08: 11833302-11835501	Stringtie	Heart- and neural crest derivatives-expressed protein 2 [Salmo salar]	hand2	HAND2	-2.72977	-2.1019	-1.43067	-1.70431	-1.89362	-1.77942	-1.83626	6
MSTRG.41815	ssa28: 26033416-26043056	BLASTn	proline-rich extensin-like protein EPR1 [Salmo trutta]		--	-2.76638	-3.15214	-3.01048	-2.1854	-2.2644	-2.50002	-2.4264	6
MSTRG.38507	ssa24: 27394345-27407042	BLASTx	Long-chain-fatty-acid--CoA ligase ACSBG2 [Xenopus laevis]		ACSBG2	-2.8937		-2.15166					6
MSTRG.42891	NW_025547355.1: 40689-48631	BLASTx	Uncharacterized threonine-rich GPI-anchored glycoprotein PJ4664.02 [Schizosaccharomyces pombe 972h-]		--	-3.31783							6
MSTRG.41736	ssa28: 20437318-20456277	BLASTx	Interferon gamma receptor 1-like [Carassius auratus]		IFNGR1	-3.43731				-4.32312			6
MSTRG.42387|LOC106590496	ssa29: 27021889-27038629	Stringtie|BLASTx	proteoglycan 4(LOC106590496) [Salmo salar]	LOC106590496	COPS9	-3.94946							6
MSTRG.47060	NW_025550565.1: 67811-133254	BLASTx	Protein phosphatase Slingshot homolog 2 [Homo sapiens]		SSH2	-9.15531							6
MSTRG.4933	ssa02: 94622294-94672820	BLASTx	Post-GPI attachment to proteins factor 6 [Mus musculus]		PGAP6	-10.1437	5.71291						6
LOC106571475|LOC106571475	ssa15: 43028579-43054731	Stringtie	centrosomal protein of 170 kDa protein B-like(LOC106571475) [Salmo salar]	LOC106571475	CEP170B					-1.68309			6
MSTRG.46999	NW_025550452.1: 61596-96123	BLASTx	UDP-glucuronosyltransferase 1-2 [Mus musculus]		UGT1A1			-1.54577		-1.55397			6
LOC106611614|LOC106611614	ssa09: 64180015-64223490	Stringtie	gamma-aminobutyric acid receptor subunit alpha-4-like [Salmo salar]	gabra4	GABRA4					-1.94701			6
MSTRG.30088|LOC106575566	ssa17: 24110451-24121794	Stringtie|BLASTx	insulin-like growth factor-binding protein 5(LOC106575566) [Salmo salar]	LOC106575566	IGFBP5		-1.62036	-1.1693		-1.54301			6
MSTRG.36488	ssa22: 27881779-27891976	BLASTx	Neuroblastoma suppressor of tumorigenicity 1 [Danio rerio]		MICOS10-NBL1					-1.22519			6
MSTRG.34333|LOC106580487	ssa20: 33625442-33998886	Stringtie	armadillo repeat protein deleted in velo-cardio-facial syndrome homolog(LOC106580487) [Salmo salar]	LOC106580487	ARVCF					-1.5961			6
MSTRG.25403|LOC106570111	ssa14: 57133813-57136119	BLASTx	Protein S100-A13 [Bos taurus]		S100A13		-1.20152			-1.3583			6
MSTRG.30306	ssa17: 34446308-34453561	Stringtie|BLASTx	leucine-rich repeat extensin-like protein 3(LOC106575921) [Salmo salar]	LOC106575921	SCEL			-1.3615		-1.24132			6
MSTRG.23701	ssa13: 80911318-80924582	BLASTx	Transposable element Tcb2 transposase [Caenorhabditis briggsae]		--		-1.09781			-1.15952			6
MSTRG.29146|LOC106574552	ssa16: 71303715-71307496	Stringtie|BLASTx	claudin-10(LOC106574552) [Salmo salar]	LOC106574552	CLDN10			-1.10154	-1.16424	-1.38182			6
MSTRG.15217|xpnpep2	ssa09: 58482519-58509553	Stringtie	X-prolyl aminopeptidase (aminopeptidase P) 2, membrane-bound(xpnpep2) [Salmo salar]	xpnpep2	XPNPEP2					-1.20342			6
MSTRG.43576	NW_025547929.1: 22179-59850	BLASTx	Nuclear pore complex protein Nup107 [Mus musculus]		NUP107					-8.8977			6
MSTRG.21606|fmoda	ssa12: 55698463-55704949	BLASTx	Fibromodulin [Gallus gallus]		FMOD					-1.13748			6
MSTRG.34653	ssa20: 52901209-52953603	Stringtie|BLASTx	sodium-dependent serotonin transporter(LOC106580796) [Salmo salar]	LOC106580796	SLC6A4					-1.46939			6
MSTRG.32543|LOC123728679	ssa18: 83968085-83980473	Stringtie|BLASTx	endonuclease domain-containing 1 protein-like(LOC123728679) [Salmo salar]	LOC123728679	ENDOD1					4.10399			6
MSTRG.2033|igsf9a	ssa01: 136907993-136938839	Stringtie	immunoglobulin superfamily, member 9a(igsf9a) [Salmo salar]	igsf9a	IGSF9					-1.04282			6
MSTRG.16050	ssa09: 116363020-116428772	BLASTx	Transmembrane protease serine 13 [Homo sapiens]		TMPRSS13		-1.43334			-1.85991			6
LOC106590196|LOC106590196	ssa29: 14454960-14575810	Stringtie	cadherin-7-like(LOC106590196) [Salmo salar]	LOC106590196	CDH7		-1.62879	-1.34751		-1.65964			6
MSTRG.5184	ssa03: 12836580-12854970	BLASTn	coiled-coil domain containing 39 (ccdc39), transcript variant X2, mRNA [Oncorhynchus kisutch]		CCDC39			-1.60061		-1.28632			6
LOC106589887|LOC106589887	ssa28: 32937702-32955686	Stringtie	fatty acid desaturase 6-like(LOC106589887) [Salmo salar]	LOC106589887	FADS6					-1.12499			6
MSTRG.16731|leg4	ssa09: 156331363-156411798	Stringtie|BLASTx	Galectin-4(leg4) [Salmo salar]	leg4	LGALS4					-1.31813			6
MSTRG.22090	ssa12: 84187527-84202069	BLASTx	Glycerate kinase [Danio rerio]		GLYCTK		-2.36602			-1.41014			6
MSTRG.10278	ssa05: 72202738-72206284	BLASTn	kell blood group glycoprotein-like (LOC115176760), transcript variant X4, mRNA [Salmo trutta]		KEL					-1.37057			6
MSTRG.463	ssa01: 27094530-27124394	BLASTx	Apoptosis-resistant E3 ubiquitin protein ligase 1 [Mus musculus]		AREL1					-10.2358	-7.28924		6
MSTRG.40055	ssa26: 27077890-27082303	BLASTn	E3 ubiquitin-protein ligase TRIM21-like [Salmo salar]	trim21	TRIM21			-1.3165		-1.01472			6
MSTRG.39291|LOC123730517	ssa25: 33804385-33817743	Stringtie|BLASTx	uncharacterized LOC123730517(LOC123730517) [Salmo salar]	LOC123730517	--					-9.18052			6
oca2|oca2	ssa10: 1573347-1894373	Stringtie	oculocutaneous albinism II(oca2) [Salmo salar]	oca2	OCA2					-1.51298			6
MSTRG.15520	ssa09: 76502676-76505576	BLASTn	raftlin, lipid raft linker 1a (rftn1a), mRNA [Salvelinus fontinalis]		RFTN1					-1.08401			6
MSTRG.9951	ssa05: 60157644-60170901	BLASTx	Probable C-mannosyltransferase DPY19L1 [Homo sapiens]		DPY19L1				-5.73932	-6.95529	-7.36499	-6.84927	6
LOC106571060|LOC106571060	ssa15: 23500780-23518599	Stringtie	G-protein coupled receptor 176-like [Salmo salar]	gpr176	GPR176		-1.26493	-1.05398		-1.49304			6
MSTRG.13058|LOC106608879	ssa07: 25112438-25146217	Stringtie	protein inturned-like(LOC106608879) [Salmo salar]	LOC106608879	INTU					-1.25697			6
MSTRG.6696	ssa03: 80897707-80905776	BLASTx	Transposable element Tcb1 transposase [Caenorhabditis briggsae]		--					-5.15861			6
MSTRG.40092|LOC106587630	ssa26: 29707524-29711118	Stringtie|BLASTx	iroquois-class homeodomain protein irx-3(LOC106587630) [Salmo salar]	LOC106587630	IRX3					-1.22704			6
MSTRG.25226	ssa14: 44855787-44870681	Stringtie|BLASTx	lipoprotein lipase(LOC106569629) [Salmo salar]	LOC106569629	LPL			-1.34695		-2.25094			6
MSTRG.20683|LOC106592278	ssa12: 12863915-12874213	Stringtie	basement membrane-specific heparan sulfate proteoglycan core protein-like [Salmo salar]	hspg2	HSPG2					-1.10222			6
MSTRG.41408	ssa28: 3666237-3669320	BLASTx	Probable RNA-directed DNA polymerase from transposon X-element [Drosophila melanogaster]		--					-1.92784			6
MSTRG.13054|f13a	ssa07: 25037203-25051249	Stringtie	Coagulation factor XIII A chain(f13a) [Salmo salar]	f13a	F13A					-1.1917			6
MSTRG.3381|LOC106579796	ssa02: 30887060-30901416	Stringtie	uncharacterized LOC106579796(LOC106579796) [Salmo salar]	LOC106579796	--					-1.22003			6
MSTRG.41410|LOC106589334	ssa28: 3783684-3785364	Stringtie	dexamethasone-induced Ras-related protein 1(LOC106589334) [Salmo salar]	LOC106589334	RASD1					-1.30126			6
MSTRG.12623	ssa07: 1524656-1529785	BLASTx	Microtubule-actin cross-linking factor 1, isoforms 6/7 [Homo sapiens]		MACF1					-1.0001			6
MSTRG.31184	ssa18: 510102-514902	BLASTx	Microtubule-actin cross-linking factor 1, isoforms 6/7 [Homo sapiens]		MACF1					-1.07868			6
MSTRG.10383	ssa05: 75095413-75142574	BLASTx	Nuclear pore membrane glycoprotein 210 [Rattus norvegicus]		NUP210					-1.56331			6
MSTRG.37262|LOC106584017	ssa23: 8007003-8015671	Stringtie	thrombopoietin receptor(LOC106584017) [Salmo salar]	LOC106584017	MPL					-1.25305			6
LOC106583131|LOC106583131	ssa22: 26158173-26287089	Stringtie	calmodulin-binding transcription activator 1-like(LOC106583131) [Salmo salar]	LOC106583131	CAMTA1					-1.33219			6
LOC106603100|LOC106603100	ssa04: 41306270-41398995	Stringtie	disks large homolog 4(LOC106603100) [Salmo salar]	LOC106603100	DLG4		-1.51015			-1.19652		-1.60254	6
MSTRG.12890	ssa07: 17466639-17539232	BLASTx	Peroxisome proliferator-activated receptor gamma coactivator 1-alpha [Sus scrofa]		PPARGC1A					-1.24023			6
MSTRG.43711	NW_025547990.1: 64483-92227	BLASTn	uncharacterized LOC115194770 (LOC115194770), mRNA [Salmo trutta]		--					-1.00761			6
MSTRG.10670	ssa05: 86246989-86318638	BLASTx	Protein tyrosine phosphatase type IVA 3 [Bos taurus]		PTP4A3			-1.02013		-1.16586			6
MSTRG.18780	ssa11: 8526930-8583039	BLASTn	gamma-crystallin S-1-like (LOC121553472), mRNA [Coregonus clupeaformis]		CRYGS					-1.85414			6
MSTRG.4981	ssa03: 1016275-1052916	BLASTx	Transcription elongation factor A protein 1 [Homo sapiens]		TCEA1					-2.7524	-3.13667		6
MSTRG.33649	ssa19: 77704838-77706666	BLASTn	mucin 3A, cell surface associated [Salmo salar]	muc3	MUC3			-1.40612					6
MSTRG.32277	ssa18: 73014359-73020873	BLASTn	mucin-5AC-like (LOC115139042), partial mRNA [Oncorhynchus nerka]		MUC5AC			-2.23006			-2.05173		6
MSTRG.42656	NW_025546990.1: 2098-5996	BLASTx	Mucin-22 [Homo sapiens]		MUC22						3.05737		6
MSTRG.32266|LOC106577928	ssa18: 73065554-73157279	Stringtie|BLASTx	mucin-2(LOC106577928) [Salmo salar]	LOC106577928	MUC2			-3.40104					6
MSTRG.17889	ssa10: 75860589-75862107	BLASTn	chemokine XC receptor 1-like (LOC106574083), mRNA [Salmo salar]	LOC106574083	XCR1						-1.42764		6
MSTRG.15038	ssa09: 44512608-44514633	BLASTn	transcriptional-regulating factor 1-like (LOC124046758), transcript variant X7, mRNA [Oncorhynchus gorbuscha]		TRERF1			-1.15677					6
MSTRG.43421	NW_025547714.1: 116133-118786	BLASTn	UDP glycosyltransferase 8 [Salvelinus fontinalis]		UGT8		-1.15705						6
MSTRG.41305	ssa27: 41061879-41069343	BLASTn	uncharacterized LOC106589100 (LOC106589100), transcript variant X4, misc_RNA [Salmo salar]	LOC106589100	--				-5.9626		-6.87056	7.84636	6
MSTRG.14642	ssa09: 18252979-18261161	BLASTn	uncharacterized LOC106610883 [Salmo salar]	LOC106610883	--			-8.00255					6
MSTRG.47056	NW_025550565.1: 62477-64272	BLASTn	uncharacterized LOC115138260 (LOC115138260), transcript variant X1, ncRNA [Oncorhynchus nerka]		--			-1.03266					6
MSTRG.34313	ssa20: 31958209-31958626	BLASTn	uncharacterized LOC118398701 (LOC118398701), transcript variant X2, ncRNA [Oncorhynchus keta]		--			-3.30403				-3.44234	6
MSTRG.44487	NW_025548330.1: 99947-109329	BLASTn	uncharacterized LOC123731747 [Salmo salar]	LOC123731747	--		-1.55974						6
MSTRG.14340	ssa08: 24813205-24816325	BLASTn	uncharacterized LOC123744243 (LOC123744243), transcript variant X1, ncRNA [Salmo salar]	LOC123744243	--						-1.21192		6
MSTRG.28662	ssa16: 41069837-41071142	BLASTn	uncharacterized LOC129817591 (LOC129817591), ncRNA [Salvelinus fontinalis]		--			-1.0401					6
MSTRG.19305	ssa11: 39818126-39819303	BLASTn	uncharacterized LOC129844687 (LOC129844687), transcript variant X1, mRNA [Salvelinus fontinalis]		--			-1.19174					6
MSTRG.25352	ssa14: 54325634-54326510	BLASTn	uncharacterized LOC129868793 [Salvelinus fontinalis]		--		-1.20779						6
MSTRG.18931	ssa11: 18623329-18671254	BLASTx	[F-actin]-monooxygenase MICAL2 [Rattus norvegicus]		MICAL2		-1.09651						6
MSTRG.21064	ssa12: 28370605-28383650	BLASTx	40S ribosomal protein SA [Salmo salar]	rpsa	RPSA			-9.11005					6
MSTRG.12267	ssa06: 70292563-70356498	BLASTx	A-kinase anchor protein 12 [Mus musculus]		AKAP12						-1.72032		6
MSTRG.443	ssa01: 26108319-26137160	BLASTx	Acid phosphatase type 7 [Danio rerio]		PPP2R5E						-2.37112		6
MSTRG.32826	ssa19: 27561593-27613067	BLASTx	Acyl-CoA dehydrogenase family member 11 [Gallus gallus]		ACAD11						-8.85538		6
MSTRG.16959	ssa10: 16536439-16556368	BLASTx	Arrestin domain-containing protein 2 [Homo sapiens]		ARRDC2			-2.83584					6
MSTRG.38635	ssa24: 35551115-35592537	BLASTx	Arylsulfatase K [Danio rerio]		ARSK						-1.62431		6
MSTRG.2835	ssa02: 10069679-10093815	BLASTx	ATP-dependent translocase ABCB1 [Cricetulus griseus]		ABCB1				-1.30359				6
MSTRG.33694	ssa19: 80936617-80952300	BLASTx	ATP-dependent zinc metalloprotease YME1L1 [Mus musculus]		YME1L1		-9.14561						6
MSTRG.33788	ssa20: 1831313-1895880	BLASTx	Autophagy-related protein 16-1 [Homo sapiens]		ATG16L1		-1.56305						6
MSTRG.33426	ssa19: 63073919-63114561	BLASTx	Band 3 anion exchange protein [Oncorhynchus mykiss]		SLC4A1			-2.13597					6
MSTRG.38143	ssa24: 10846796-10871799	BLASTx	Beta-adducin [Homo sapiens]		ADD2							-1.14425	6
MSTRG.1335	ssa01: 88424202-88439162	BLASTx	BTB/POZ domain-containing protein KCTD5 [Bos taurus]		KCTD5		-1.33968						6
MSTRG.1335|LOC106609366	ssa01: 88424202-88439162	BLASTx	BTB/POZ domain-containing protein KCTD5 [Bos taurus]		KCTD5		-1.13231						6
MSTRG.16505|LOC106613063	ssa09: 139330736-139809411	BLASTx	Chloride channel protein 2 [Cavia porcellus]		CLCN2			-1.51848				-2.06903	6
MSTRG.14675	ssa09: 19093620-19100540	BLASTx	Cytochrome P450 1B1 [Mus musculus]		CYP1B1			-1.72331					6
MSTRG.36310|si:dkeyp-97e7.9	ssa22: 16358527-16362943	BLASTx	DEP domain-containing mTOR-interacting protein [Homo sapiens]		DEPTOR			-1.18551					6
MSTRG.36310	ssa22: 16358527-16362943	BLASTx	DEP domain-containing mTOR-interacting protein [Homo sapiens]		DEPTOR			-1.17895					6
MSTRG.47064	NW_025550568.1: 6520-30224	BLASTx	Dual specificity phosphatase 28 [Homo sapiens]		DUSP28			-1.13459					6
MSTRG.23563	ssa13: 73049860-73104626	BLASTx	E3 ubiquitin-protein ligase TTC3 [Rattus norvegicus]		TTC3		-6.25946						6
MSTRG.24145	ssa13: 102560750-102609961	BLASTx	E3 ubiquitin-protein ligase UHRF2 [Mus musculus]		UHRF2						-22.9227		6
MSTRG.43021	NW_025547464.1: 1000310-1009568	BLASTx	E3 ubiquitin/ISG15 ligase TRIM25 [Homo sapiens]		TRIM25		-2.0228						6
MSTRG.44365	NW_025548276.1: 33043-80931	BLASTx	E3 ubiquitin/ISG15 ligase TRIM25 [Homo sapiens]		TRIM25		-2.08819						6
MSTRG.32467	ssa18: 81217958-81233871	BLASTx	Endonuclease domain-containing 1 protein [Homo sapiens]		ENDOD1			-1.55691					6
MSTRG.46156	NW_025549545.1: 35015-60703	BLASTx	Equilibrative nucleoside transporter 4 [Danio rerio]		SLC29A4			-24.9353					6
MSTRG.426	ssa01: 25096557-25124035	BLASTx	FH2 domain-containing protein 1 [Mus musculus]		FHDC1		-1.21163						6
MSTRG.33488	ssa19: 67753014-67878993	BLASTx	Fibroblast growth factor receptor 3 [Xenopus laevis]		FGFR3			-1.45029					6
MSTRG.17423	ssa10: 39850624-39852859	BLASTx	Forkhead box protein Q1 [Rattus norvegicus]		FOXQ1		-23.6845						6
MSTRG.23450	ssa13: 62975214-63025735	BLASTx	General transcription factor II-I repeat domain-containing protein 1 [Homo sapiens]		GTF2IRD1			-6.69897					6
MSTRG.21369	ssa12: 39981439-39982713	BLASTx	General transcription factor II-I repeat domain-containing protein 2 [Mus musculus]		GTF2IRD2			-1.41524					6
MSTRG.8556	ssa04: 66587518-66611364	BLASTx	Hypoxia up-regulated protein 1 [Danio rerio]		HYOU1			4.12415	4.24058				6
MSTRG.24643	ssa14: 16025105-16038170	BLASTx	Inositol monophosphatase 3 [Danio rerio]		IMPA1				2.92707				6
MSTRG.44728	NW_025548359.1: 242162-253134	BLASTx	Involucrin [Pan paniscus]		IVL		-1.79866						6
MSTRG.17887	ssa10: 75848938-75857274	BLASTx	L-amino-acid oxidase [Siganus canaliculatus]		IL4I1				-1.12763				6
MSTRG.20930	ssa12: 22110729-22148650	BLASTx	Max-interacting protein 1 [Danio rerio]		MXI1		-1.62376		-1.25004				6
MSTRG.22989	ssa13: 35742648-35792331	BLASTx	Membrane-associated guanylate kinase, WW and PDZ domain-containing protein 3 [Rattus norvegicus]		MAGI3				-1.1795				6
MSTRG.18676	ssa10: 124644717-124772789	BLASTx	Myelin regulatory factor [Mus musculus]		MYRF		-1.1864						6
MSTRG.22502|LOC106566409	ssa13: 10778139-10915291	BLASTx	Myelin transcription factor 1 [Mus musculus]		MYT1			-1.72338					6
MSTRG.9431	ssa05: 33349563-33420426	BLASTx	Neuronal acetylcholine receptor subunit alpha-10 [Gallus gallus]		CHRNA10		-1.65881						6
MSTRG.6479	ssa03: 72153444-72166685	BLASTx	Nucleobindin-1 [Homo sapiens]		NUCB1			-5.66344	-5.80983				6
MSTRG.25884	ssa14: 82032389-82053008	BLASTx	Otolith matrix protein OMM-64 [Oncorhynchus mykiss]		--		-1.16361						6
MSTRG.31185	ssa18: 515390-532683	BLASTx	Platelet glycoprotein Ib alpha chain [Homo sapiens]		GP1BA			-1.26201					6
MSTRG.8935	ssa05: 225955-257671	BLASTx	Probable G-protein coupled receptor 174 [Mus musculus]		GPR174						-1.02181		6
MSTRG.842	ssa01: 50427770-50463502	BLASTx	Prominin-1-A [Danio rerio]		PROM1			-3.83308				-3.85859	6
MSTRG.43565	NW_025547913.1: 13760-26020	BLASTx	Protein phosphatase Slingshot homolog 2 [Homo sapiens]		SSH2			-1.14601					6
MSTRG.25403	ssa14: 57133813-57136119	BLASTx	Protein S100-A13 [Bos taurus]		S100A13				-2.95394				6
MSTRG.46720	NW_025550002.1: 12183-15936	BLASTx	Putative 115 kDa protein in type-1 retrotransposable element R1DM [Drosophila melanogaster]		--			-1.20343				-1.45796	6
MSTRG.30487	ssa17: 48119044-48185234	BLASTx	Putative interleukin-17 receptor E-like [Homo sapiens]		IL17REL		-1.05284						6
MSTRG.175	ssa01: 8549764-8622017	BLASTx	Putative SNAP25 homologous protein SNAP30 [Arabidopsis thaliana]		SNAP25			-2.53254					6
MSTRG.16247	ssa09: 125674513-125688165	BLASTx	Rab5 GDP/GTP exchange factor [Mus musculus]		RABGEF1			-7.38897				-6.15621	6
MSTRG.25210	ssa14: 43843325-43881286	BLASTx	Rho guanine nucleotide exchange factor 18 [Homo sapiens]		ARHGEF18						8.62424		6
MSTRG.14705	ssa09: 21050934-21060101	BLASTx	Ribosomal protein S6 kinase-like 1 [Pongo abelii]		RPS6KL1							-5.40454	6
MSTRG.17867	ssa10: 74987727-74990640	BLASTx	RNA-directed DNA polymerase from mobile element jockey [Drosophila funebris]		--						-5.62788		6
MSTRG.22410	ssa13: 4336431-4351089	BLASTx	RNA-directed DNA polymerase from mobile element jockey [Drosophila funebris]		--		-1.32106						6
MSTRG.11903	ssa06: 49166401-49324552	BLASTx	Serine/threonine-protein phosphatase 2A 56 kDa regulatory subunit alpha isoform [Mus musculus]		PPP2R5A			-2.55763					6
MSTRG.26519	ssa15: 26622524-26649763	BLASTx	Serine/threonine-protein phosphatase 4 regulatory subunit 3 [Danio rerio]		PPP4R3B			-1.50685					6
MSTRG.12433	ssa06: 82250486-82303093	BLASTx	Sodium/potassium/calcium exchanger 4 [Mus musculus]		SLC24A4		-1.26187						6
MSTRG.3246	ssa02: 24912023-24922279	BLASTx	Sperm acrosome membrane-associated protein 6 [Mus musculus]		SPACA6			-1.14529					6
MSTRG.38604|LOC106585780	ssa24: 31541046-31549577	BLASTx	STE20/SPS1-related proline-alanine-rich protein kinase [Mus musculus]		STK39		-2.95						6
MSTRG.4138	ssa02: 64103846-64115681	BLASTx	Transcription elongation factor 1 homolog [Bos taurus]		ELOF1			-2.0709					6
MSTRG.5111	ssa03: 8972364-9016597	BLASTx	Transferrin receptor protein 1 [Cricetulus griseus]		TFRC						-8.46868		6
MSTRG.23950	ssa13: 93371589-93375532	BLASTx	Transposable element Tc1 transposase [Caenorhabditis elegans]		--			-1.11286					6
MSTRG.4476	ssa02: 75052054-75138462	BLASTx	Transposable element Tcb1 transposase [Caenorhabditis briggsae]		--		-1.22687					-1.26922	6
MSTRG.17289	ssa10: 31667589-31677723	BLASTx	Transposable element Tcb1 transposase [Caenorhabditis briggsae]		--		-1.06057						6
MSTRG.22360	ssa13: 1261730-1270189	BLASTx	Transposon TX1 uncharacterized 149 kDa protein [Xenopus laevis]		--			-1.14337					6
MSTRG.43566	NW_025547913.1: 26367-35584	BLASTx	Uncharacterized protein ORF50 [Ictalurid herpesvirus 1 (strain Auburn)]		--		-1.18473						6
MSTRG.45794	NW_025549127.1: 286264-299920	BLASTx	Uncharacterized protein ORF50 [Ictalurid herpesvirus 1 (strain Auburn)]		--			-2.41973					6
MSTRG.27632	ssa15: 87146381-87155412	BLASTx	Uridine-cytidine kinase-like 1 [Mus musculus]		UCKL1			-1.00705					6
MSTRG.26554	ssa15: 28622328-28649945	BLASTx	Zinc finger protein 106 [Homo sapiens]		ZNF106							11.8443	6
MSTRG.20808|LOC106601629	ssa12: 17569088-17623242	Stringtie	B-cell receptor CD22-like(LOC106601629) [Salmo salar]	LOC106601629	CD22			-1.70379					6
MSTRG.4540|LOC106594055	ssa02: 77782140-77813703	Stringtie	beta-1,3-N-acetylglucosaminyltransferase lunatic fringe(LOC106594055) [Salmo salar]	LOC106594055	LFNG			-1.13795					6
MSTRG.8294|LOC106603240	ssa04: 50870000-50978727	Stringtie	cGMP-dependent 3',5'-cyclic phosphodiesterase(LOC106603240) [Salmo salar]	LOC106603240	PDE2A			-3.10799					6
cssa10h1orf210|cssa10h1orf210	ssa10: 46415573-46430808	Stringtie	chromosome ssa10 C1orf210 homolog(cssa10h1orf210) [Salmo salar]	cssa10h1orf210	--			-1.03194					6
MSTRG.13628|chchd3a	ssa07: 54223514-54324799	Stringtie	coiled-coil-helix-coiled-coil-helix domain containing 3a(chchd3a) [Salmo salar]	chchd3a	CHCHD3				-2.05316				6
MSTRG.21188|LOC106564914	ssa12: 32285233-32293183	Stringtie	cytoglobin-2-like(LOC106564914) [Salmo salar]	LOC106564914	CYGB						-1.18205		6
MSTRG.13476|LOC106609435	ssa07: 46419767-46432527	Stringtie	endosome/lysosome-associated apoptosis and autophagy regulator family member 2-like(LOC106609435) [Salmo salar]	LOC106609435	ELAPOR2		-1.16847						6
esrrga|esrrga	ssa09: 12881315-13006125	Stringtie	estrogen-related receptor gamma a(esrrga) [Salmo salar]	esrrga	ESRRG			-1.09107					6
MSTRG.5985|LOC106600913	ssa03: 53821721-53909454	Stringtie	GEM-interacting protein(LOC106600913) [Salmo salar]	LOC106600913	GMIP			-1.50358					6
MSTRG.25913|hepacam2	ssa14: 83774230-83800967	Stringtie	HEPACAM family member 2(hepacam2) [Salmo salar]	hepacam2	HEPACAM2			-1.00946				-1.11107	6
MSTRG.31018|LOC106576669	ssa17: 77658643-77804452	Stringtie	histo-blood group ABO system transferase-like(LOC106576669) [Salmo salar]	LOC106576669	ABO		-1.13725		-1.16722				6
MSTRG.29182|LOC106574505	ssa16: 72487759-72494112	Stringtie	inverted formin-2-like(LOC106574505) [Salmo salar]	LOC106574505	INF2			-1.09244					6
MSTRG.22988|LOC106567312	ssa13: 35686823-35741017	Stringtie	IQ motif and SEC7 domain-containing protein 2(LOC106567312) [Salmo salar]	LOC106567312	IQSEC2			-1.76594					6
MSTRG.154|LOC106603106	ssa01: 6495571-6508165	Stringtie	lysophosphatidylserine lipase ABHD12(LOC106603106) [Salmo salar]	LOC106603106	ABHD12			-1.61018					6
MSTRG.28802|mknk1	ssa16: 47293689-47320084	Stringtie	MAPK interacting serine/threonine kinase 1(mknk1) [Salmo salar]	mknk1	MKNK1			-2.01982					6
MSTRG.33638|mppe1	ssa19: 76686336-76701635	Stringtie	metallophosphoesterase 1(mppe1) [Salmo salar]	mppe1	MPPE1				-1.02145				6
MSTRG.11813|LOC106607496	ssa06: 43686168-43697670	Stringtie	nuclear receptor subfamily 1 group D member 1(LOC106607496) [Salmo salar]	LOC106607496	NR1D1			-1.05431					6
MSTRG.35183|LOC106581491	ssa20: 88241173-88246039	Stringtie	P2Y purinoceptor 13(LOC106581491) [Salmo salar]	LOC106581491	P2RY13			-1.157					6
MSTRG.21673|LOC106565393	ssa12: 59866886-59874349	Stringtie	purine nucleoside phosphorylase-like(LOC106565393) [Salmo salar]	LOC106565393	LACC1							-1.3163	6
MSTRG.4386|LOC106592003	ssa02: 72279339-72284018	Stringtie	regulator of G-protein signaling 4-like(LOC106592003) [Salmo salar]	LOC106592003	RGS4				1.04882				6
MSTRG.34903|LOC106581150	ssa20: 66414654-66441051	Stringtie	rho GTPase-activating protein 32(LOC106581150) [Salmo salar]	LOC106581150	ARHGAP32			-1.22396					6
MSTRG.6492|LOC106593626	ssa03: 72465260-72551941	Stringtie	SH3 and multiple ankyrin repeat domains protein 1-like(LOC106593626) [Salmo salar]	LOC106593626	SHANK1			-1.10729					6
MSTRG.30536|LOC106576039	ssa17: 51679970-51704815	Stringtie	SLIT-ROBO Rho GTPase-activating protein 1-like(LOC106576039) [Salmo salar]	LOC106576039	SRGAP1			-1.19063					6
MSTRG.13285|LOC106609150	ssa07: 37142457-37172057	Stringtie	SLIT-ROBO Rho GTPase-activating protein 1-like(LOC106609150) [Salmo salar]	LOC106609150	SRGAP1		-1.19984						6
MSTRG.18072|slc12a3	ssa10: 87096930-87105475	Stringtie	solute carrier family 12 member 3(slc12a3) [Salmo salar]	slc12a3	SLC12A3		-1.34091						6
MSTRG.10291|LOC106605837	ssa05: 72492927-72511032	Stringtie	transient receptor potential cation channel subfamily V member 6-like(LOC106605837) [Salmo salar]	LOC106605837	TRPV6		-1.00598	-1.00144					6
MSTRG.37266|LOC106584021	ssa23: 8116829-8127032	Stringtie	transmembrane protein 125(LOC106584021) [Salmo salar]	LOC106584021	TMEM125			-1.05451					6
MSTRG.22505|LOC106566424	ssa13: 10966568-11031200	Stringtie	uncharacterized LOC106566424(LOC106566424) [Salmo salar]	LOC106566424	--							-9.1229	6
MSTRG.25569|LOC106569950	ssa14: 65137862-65143714	Stringtie	uncharacterized LOC106569950(LOC106569950) [Salmo salar]	LOC106569950	--			-1.43565					6
MSTRG.4669|LOC106591099	ssa02: 79746245-79937716	Stringtie	uncharacterized LOC106591099(LOC106591099) [Salmo salar]	LOC106591099	--		-2.18913						6
MSTRG.6226|LOC106601068	ssa03: 64161797-64166071	Stringtie	uncharacterized LOC106601068(LOC106601068) [Salmo salar]	LOC106601068	--			-1.02965					6
MSTRG.45905|LOC106602102	NW_025549194.1: 104800-207316	Stringtie	uncharacterized LOC106602102(LOC106602102) [Salmo salar]	LOC106602102	--		-1.73615						6
[truncated: 2,779 more rows]

## Sheet: Supplementary Table 3
Supplementary Table 3
List of GO terms over-represented in each set of differentially expressed genes corresponding to each cluster.
Cluster1	ID2	Term3	Theme4	qV5	N genes6	Enrichment fold-change7	Associated Genes Found8
1	GO:0002573	myeloid leukocyte differentiation	Defense & Immune Response	0.0322479	9	2.63049	[BATF3, CD81, FARP2, NPM1, OSTM1, SIGLEC15, TNFAIP6, TNFSF11, TRAF6]
1	GO:0046718	symbiont entry into host cell	Defense & Immune Response	0.0270624	7	3.37092	[CD81, CH25H, CLDN1, CLEC4M, HS3ST5, ITGB3, SIGLEC1]
1	GO:0048247	lymphocyte chemotaxis	Defense & Immune Response	0.035527	4	4.70361	[CCL21, CH25H, CYP7B1, SAA2]
1	GO:0071456	cellular response to hypoxia	Defense & Immune Response	0.0338062	6	3.33388	[AQP3, BMP7, PTGS2, RGCC, SUV39H1, TIGAR]
1	GO:0036294	cellular response to decreased oxygen levels	Defense & Immune Response	0.0361382	6	3.22748	[AQP3, BMP7, PTGS2, RGCC, SUV39H1, TIGAR]
1	GO:0051048	negative regulation of secretion	Metabolism, Transport & Homeostasis	0.0211913	8	3.6117	[ANXA1, CCN3, DRD3, FLNB, INHBB, MIDN, RAB7A, SYT4]
1	GO:0006606	protein import into nucleus	Metabolism, Transport & Homeostasis	0.0315479	8	3.2104	[E2F3, FAM53B, IPO5, NPM1, NUTF2, PHB2, RANBP2, SMAD3]
1	GO:0051170	import into nucleus	Metabolism, Transport & Homeostasis	0.0278674	8	3.06447	[E2F3, FAM53B, IPO5, NPM1, NUTF2, PHB2, RANBP2, SMAD3]
1	GO:1903531	negative regulation of secretion by cell	Metabolism, Transport & Homeostasis	0.033888	7	3.6117	[ANXA1, CCN3, DRD3, INHBB, MIDN, RAB7A, SYT4]
1	GO:0000966	RNA 5'-end processing	Metabolism, Transport & Homeostasis	0.0339426	4	4.93305	[POP1, PRORP, SNRPD1, SNRPF]
1	GO:0000387	spliceosomal snRNP assembly	Metabolism, Transport & Homeostasis	0.0347042	4	4.8156	[PRPF19, SNRPD1, SNRPF, WDR77]
1	GO:0006692	prostanoid metabolic process	Metabolism, Transport & Homeostasis	0.035527	4	4.70361	[MGST3, PTGR1, PTGR2, PTGS2]
1	GO:0050709	negative regulation of protein secretion	Metabolism, Transport & Homeostasis	0.035527	4	4.70361	[CCN3, DRD3, INHBB, MIDN]
1	GO:0007178	cell surface receptor protein serine/threonine kinase signaling pathway	Regulation & Signalling	0.0367038	13	2.07359	[BMP7, CCN3, CLDN5, DKK1, DKK3, FSTL5, ING1, INHBB, PXN, SMAD3, SOST, TMEM119, TNFAIP6]
1	GO:0050919	negative chemotaxis	Regulation & Signalling	0.0326417	4	5.18603	[ITGB3, SEMA4B, SEMA4D, SEMA6A]
1	GO:0007229	integrin-mediated signaling pathway	Regulation & Signalling	0.0324436	7	3.16024	[DST, ITGA2, ITGB3, ITGB6, LAMA1, PHACTR4, SPNS1]
1	GO:0043113	receptor clustering	Regulation & Signalling	0.0373297	4	4.49456	[CD81, DLG3, PIGR, TNFAIP6]
1	GO:0044089	positive regulation of cellular component biogenesis	Tissue & Cell Organization	0.0225099	19	2.13492	[BMP7, CCL21, CLDN5, ELAPOR1, EPS8L1, FHOD1, FSCN1, MIEN1, MTSS1, PXN, RAB7A, RGCC, SASS6, SEMA4D, SMAD3, SPAG5, SYNPO, TPPP2, TPPP3]
1	GO:0045216	cell-cell junction organization	Tissue & Cell Organization	0.00953966	13	3.3367	[CDH4, CLDN1, CLDN5, DSP, FSCN1, GJC1, MICALL2, MPDZ, MTSS1, PKP1, PKP3, POF1B, SMAD3]
1	GO:0030198	extracellular matrix organization	Tissue & Cell Organization	0.0308785	12	2.56019	[ADAMTS7, COL5A1, CTSK, FSCN1, ITGA2, LAMA1, MMP13, MMP25, NID2, PLOD3, RGCC, SMAD3]
1	GO:0007043	cell-cell junction assembly	Tissue & Cell Organization	0.0214365	10	3.26218	[CDH4, CLDN1, CLDN5, FSCN1, GJC1, MICALL2, MPDZ, PKP1, PKP3, POF1B]
1	GO:0048762	mesenchymal cell differentiation	Tissue & Cell Organization	0.0300715	11	2.57501	[BMP7, EZH2, HGF, HMGA2, NOLC1, PHACTR4, RGCC, SEMA4B, SEMA4D, SEMA6A, SMAD3]
1	GO:0032233	positive regulation of actin filament bundle assembly	Tissue & Cell Organization	0.0279763	5	4.59671	[FHOD1, MTSS1, PXN, RGCC, SYNPO]
1	GO:0090497	mesenchymal cell migration	Tissue & Cell Organization	0.0321429	4	5.05638	[PHACTR4, SEMA4B, SEMA4D, SEMA6A]
1	GO:0045104	intermediate filament cytoskeleton organization	Tissue & Cell Organization	0.0341019	6	3.37092	[DSP, DST, KRT13, NEFH, PKP1, TCHH]
1	GO:0051495	positive regulation of cytoskeleton organization	Tissue & Cell Organization	0.0465529	8	2.45158	[CCL21, FHOD1, MTSS1, PXN, RGCC, SASS6, SPAG5, SYNPO]
1	GO:0045109	intermediate filament organization	Tissue & Cell Organization	0.0462556	5	3.32657	[DSP, KRT13, NEFH, PKP1, TCHH]
1	GO:0048333	mesodermal cell differentiation	Tissue Growth & Development	0.0141593	4	10.645	[DKK1, HMGA2, ITGA2, ITGB3]
1	GO:1902808	positive regulation of cell cycle G1/S phase transition	Tissue Growth & Development	0.00501607	7	7.37389	[CDK10, EZH2, FGF10, PHB2, PKP3, RGCC, SASS6]
1	GO:0046850	regulation of bone remodeling	Tissue Growth & Development	0.0215583	5	6.16632	[ITGB3, LEPROT, SIGLEC15, TMEM119, TNFSF11]
1	GO:1901989	positive regulation of cell cycle phase transition	Tissue Growth & Development	0.0167372	8	4.49456	[CDK10, EZH2, FGF10, NPM1, PHB2, PKP3, RGCC, SASS6]
1	GO:0045453	bone resorption	Tissue Growth & Development	0.0210706	5	6.0195	[ACP5, ITGB3, SIGLEC15, TMEM119, TNFSF11]
1	GO:0045124	regulation of bone resorption	Tissue Growth & Development	0.0330227	4	6.32047	[ITGB3, SIGLEC15, TMEM119, TNFSF11]
1	GO:0001707	mesoderm formation	Tissue Growth & Development	0.0330227	4	6.32047	[DKK1, HMGA2, ITGA2, ITGB3]
1	GO:0048332	mesoderm morphogenesis	Tissue Growth & Development	0.0320672	4	6.12895	[DKK1, HMGA2, ITGA2, ITGB3]
1	GO:0090068	positive regulation of cell cycle process	Tissue Growth & Development	0.0290549	11	2.52819	[ATRX, CDK10, DRD3, EZH2, FGF10, NPM1, PHB2, PKP3, RGCC, SASS6, SPAG5]
1	GO:0030316	osteoclast differentiation	Tissue Growth & Development	0.025239	7	4.42433	[CD81, FARP2, OSTM1, SIGLEC15, TNFAIP6, TNFSF11, TRAF6]
1	GO:1900087	positive regulation of G1/S transition of mitotic cell cycle	Tissue Growth & Development	0.0298209	4	5.94868	[CDK10, FGF10, RGCC, SASS6]
1	GO:0033260	nuclear DNA replication	Tissue Growth & Development	0.0334672	4	5.32251	[ATRX, LIG1, MCM7, TK1]
1	GO:0044843	cell cycle G1/S phase transition	Tissue Growth & Development	0.0356806	10	2.34092	[CDK10, E2F3, EZH2, FGF10, KANK2, PHB2, PKP3, RGCC, SASS6, TRIM71]
1	GO:0014032	neural crest cell development	Tissue Growth & Development	0.0304038	5	4.68183	[NOLC1, PHACTR4, SEMA4B, SEMA4D, SEMA6A]
1	GO:0048864	stem cell development	Tissue Growth & Development	0.0262885	5	4.51462	[NOLC1, PHACTR4, SEMA4B, SEMA4D, SEMA6A]
1	GO:0001755	neural crest cell migration	Tissue Growth & Development	0.0321429	4	5.05638	[PHACTR4, SEMA4B, SEMA4D, SEMA6A]
1	GO:0044786	cell cycle DNA replication	Tissue Growth & Development	0.0347042	4	4.8156	[ATRX, LIG1, MCM7, TK1]
1	GO:0014033	neural crest cell differentiation	Tissue Growth & Development	0.0332409	5	4.07773	[NOLC1, PHACTR4, SEMA4B, SEMA4D, SEMA6A]
1	GO:0001704	formation of primary germ layer	Tissue Growth & Development	0.0332675	6	3.56921	[COL5A1, DKK1, HMGA2, ITGA2, ITGB3, LAMA3]
1	GO:1902806	regulation of cell cycle G1/S phase transition	Tissue Growth & Development	0.0384766	8	2.59302	[CDK10, EZH2, FGF10, KANK2, PHB2, PKP3, RGCC, SASS6]
1	GO:0007099	centriole replication	Tissue Growth & Development	0.0402436	4	4.3033	[CEP72, NPM1, RBM14, SASS6]
1	GO:0035987	endodermal cell differentiation	Tissue Growth & Development	0.0402436	4	4.3033	[COL5A1, DKK1, HMGA2, LAMA3]
1	GO:0071526	semaphorin-plexin signaling pathway	Tissue Growth & Development	0.0402436	4	4.3033	[FARP2, SEMA4B, SEMA4D, SEMA6A]
1	GO:0045667	regulation of osteoblast differentiation	Tissue Growth & Development	0.039508	6	3.09574	[BMP7, CCN4, HGF, SEMA4D, TMEM119, TNFAIP6]
1	GO:0045778	positive regulation of ossification	Tissue Growth & Development	0.0442563	4	4.12766	[BMP7, CCN3, SLC8A1, TMEM119]
1	GO:1901992	positive regulation of mitotic cell cycle phase transition	Tissue Growth & Development	0.0399244	5	3.51137	[CDK10, FGF10, PHB2, RGCC, SASS6]
1	GO:0002011	morphogenesis of an epithelial sheet	Tissue Growth & Development	0.0473963	4	3.96579	[BMP7, COL5A1, ITGB3, PHACTR4]
1	GO:0098534	centriole assembly	Tissue Growth & Development	0.0485044	4	3.88952	[CEP72, NPM1, RBM14, SASS6]
1	GO:0045669	positive regulation of osteoblast differentiation	Tissue Growth & Development	0.0485044	4	3.88952	[BMP7, CCN4, HGF, TMEM119]
1	GO:0060348	bone development	Tissue Growth & Development	0.0480398	6	2.8621	[CYP26B1, LEPROT, MMP13, SEMA4D, SIGLEC15, TMEM119]
2	GO:0070527	platelet aggregation	Defense & Immune Response	0.026409	4	3.84477	[CEACAM1, HBB, MFSD2B, PIK3CG]
2	GO:0035329	hippo signaling	Tissue Growth & Development	0.023717	4	4.03385	[AMOT, ARRDC3, MOB4, WWC2]
2	GO:0042476	odontogenesis	Tissue Growth & Development	0.00994235	5	4.73202	[AQP3, BMP4, CD34, RELT, ROGDI]
2	GO:0045197	establishment or maintenance of epithelial cell apical/basal polarity	Tissue Growth & Development	0.00977952	4	6.15162	[CAMSAP3, DLG3, MPP2, PARD6A]
2	GO:0060538	skeletal muscle organ development	Tissue Growth & Development	0.0484998	4	3.07581	[DISP1, DMD, LMOD3, MYL6]
2	GO:0007605	sensory perception of sound	Defense & Immune Response	0.0414851	5	2.79619	[COL2A1, COL4A3, SLC26A4, TECTA, USH2A]
2	GO:0099587	inorganic ion import across plasma membrane	Metabolism, Transport & Homeostasis	0.0491138	5	2.6289	[ATP1A1, KCNJ1, SLC12A7, SLC8A1, SLC9A3]
2	GO:0098659	inorganic cation import across plasma membrane	Metabolism, Transport & Homeostasis	0.0491138	5	2.6289	[ATP1A1, KCNJ1, SLC12A7, SLC8A1, SLC9A3]
2	GO:0001558	regulation of cell growth	Tissue Growth & Development	0.00704436	13	2.57142	[ACVRL1, CDK11B, CEACAM1, GOLGA4, OGFR, PABIR1, PAPPA2, PRR5, PTPRJ, RASGRP2, SGK2, SYT2, TGFBR1]
2	GO:0030307	positive regulation of cell growth	Tissue & Cell Organization	0.048494	5	2.65156	[GOLGA4, PABIR1, PRR5, SYT2, TGFBR1]
2	GO:0032623	interleukin-2 production	Defense & Immune Response	0.0193922	4	4.47391	[CD34, GBP1, IRF4, PNP]
2	GO:0032663	regulation of interleukin-2 production	Defense & Immune Response	0.0193922	4	4.47391	[CD34, GBP1, IRF4, PNP]
2	GO:0045619	regulation of lymphocyte differentiation	Defense & Immune Response	0.0264937	7	2.56318	[BMP4, FOXJ1, IRF4, NLRP3, PNP, ZFP36L2, ZMIZ1]
2	GO:0045580	regulation of T cell differentiation	Defense & Immune Response	0.0380496	6	2.56318	[BMP4, FOXJ1, IRF4, NLRP3, PNP, ZMIZ1]
2	GO:0002704	negative regulation of leukocyte mediated immunity	Defense & Immune Response	0.0193922	4	4.47391	[CD84, CEACAM1, FOXJ1, NECTIN4]
2	GO:0007156	homophilic cell adhesion via plasma membrane adhesion molecules	Tissue & Cell Organization	0.00595636	6	5.67842	[CD84, CEACAM1, CEACAM5, HMCN2, IGSF11, NECTIN4]
2	GO:0006885	regulation of pH	Metabolism, Transport & Homeostasis	0.00911365	6	4.34232	[CHP1, PDK2, SLC26A4, SLC26A6, SLC4A4, SLC9A3]
2	GO:0051453	regulation of intracellular pH	Metabolism, Transport & Homeostasis	0.0484998	4	3.07581	[CHP1, SLC26A6, SLC4A4, SLC9A3]
2	GO:0015701	bicarbonate transport	Metabolism, Transport & Homeostasis	0.00415421	5	8.09424	[BEST2, CA4, SLC26A4, SLC26A6, SLC4A4]
2	GO:0015106	bicarbonate transmembrane transporter activity	Metabolism, Transport & Homeostasis	0.00654255	4	7.93758	[BEST2, SLC26A4, SLC26A6, SLC4A4]
2	GO:0015291	secondary active transmembrane transporter activity	Metabolism, Transport & Homeostasis	0.00905721	11	2.72854	[CHP1, MFSD1, SLC12A7, SLC26A4, SLC26A6, SLC4A4, SLC6A11, SLC7A5, SLC8A1, SLC9A3, SLCO5A1]
2	GO:0035725	sodium ion transmembrane transport	Metabolism, Transport & Homeostasis	0.00673015	11	2.96789	[ATP1A1, CHP1, DMD, FXYD1, FXYD3, GPD1L, SGK2, SLC4A4, SLC6A11, SLC8A1, SLC9A3]
2	GO:0015297	antiporter activity	Metabolism, Transport & Homeostasis	0.0169126	6	3.29551	[CHP1, SLC26A4, SLC26A6, SLC7A5, SLC8A1, SLC9A3]
2	GO:0015081	sodium ion transmembrane transporter activity	Metabolism, Transport & Homeostasis	0.0059334	11	3.11833	[ATP1A1, CHP1, DMD, FXYD1, FXYD3, GPD1L, SGK2, SLC4A4, SLC6A11, SLC8A1, SLC9A3]
2	GO:0035195	miRNA-mediated post-transcriptional gene silencing	Regulation & Signalling	0.0168149	4	4.73202	[BMP4, CNOT6, TNRC6A, XPO5]
2	GO:0060993	kidney morphogenesis	Tissue Growth & Development	0.0193922	4	4.47391	[BMP4, FOXJ1, MYC, WNK4]
2	GO:0001823	mesonephros development	Tissue Growth & Development	0.0168149	4	4.73202	[BMP4, BMP7, FOXJ1, MYC]
2	GO:0072164	mesonephric tubule development	Tissue Growth & Development	0.0139807	4	5.12635	[BMP4, BMP7, FOXJ1, MYC]
2	GO:0010586	miRNA metabolic process	Metabolism, Transport & Homeostasis	0.0257898	5	3.2377	[BMP4, MYC, TUT4, XPO5, ZNF512B]
2	GO:0072080	nephron tubule development	Tissue Growth & Development	0.0184367	4	4.55676	[BMP4, MTSS1, MYC, WNK4]
2	GO:0072163	mesonephric epithelium development	Tissue Growth & Development	0.0139807	4	5.12635	[BMP4, BMP7, FOXJ1, MYC]
2	GO:0001657	ureteric bud development	Tissue Growth & Development	0.0133599	4	5.23543	[BMP4, BMP7, FOXJ1, MYC]
2	GO:0016441	post-transcriptional gene silencing	Regulation & Signalling	0.0303813	4	3.67261	[BMP4, CNOT6, TNRC6A, XPO5]
2	GO:0035194	regulatory ncRNA-mediated post-transcriptional gene silencing	Regulation & Signalling	0.0234381	4	4.10108	[BMP4, CNOT6, TNRC6A, XPO5]
2	GO:0045216	cell-cell junction organization	Tissue & Cell Organization	0.00654087	10	3.12265	[ACVRL1, CAMSAP3, CDH26, CLDN4, CLDN8, CTNNA1, MTSS1, PARD6A, SLC39A9, TGFBR1]
2	GO:0101023	vascular endothelial cell proliferation	Tissue Growth & Development	0.00557479	4	10.2527	[COL4A3, FGFR1, SLC39A9, TGFBR1]
2	GO:0001936	regulation of endothelial cell proliferation	Tissue Growth & Development	0.00589877	8	3.93704	[ACVRL1, ATP5F1A, COL4A3, FGFR1, PPP1R16B, SLC39A9, TGFBR1, THBS1]
2	GO:0003197	endocardial cushion development	Tissue Growth & Development	0.0123537	4	5.46811	[ACVRL1, BMP4, BMP7, TGFBR1]
2	GO:0032330	regulation of chondrocyte differentiation	Tissue Growth & Development	0.00665925	4	8.20217	[ACVRL1, ADAMTS7, SOX6, TGFBR1]
2	GO:0120193	tight junction organization	Tissue & Cell Organization	0.01966	5	3.6186	[ACVRL1, CLDN4, CLDN8, SLC39A9, TGFBR1]
2	GO:0003203	endocardial cushion morphogenesis	Tissue Growth & Development	0.0094595	4	6.30936	[ACVRL1, BMP4, BMP7, TGFBR1]
2	GO:0043297	apical junction assembly	Tissue & Cell Organization	0.0168115	5	3.84477	[ACVRL1, CLDN4, CLDN8, CTNNA1, SLC39A9]
2	GO:0060390	regulation of SMAD protein signal transduction	Tissue Growth & Development	0.025853	4	3.90579	[ACVRL1, BMP4, BMP7, TGFBR1]
2	GO:0120192	tight junction assembly	Tissue & Cell Organization	0.049493	4	3.03784	[ACVRL1, CLDN4, CLDN8, SLC39A9]
2	GO:0060391	positive regulation of SMAD protein signal transduction	Tissue Growth & Development	0.0103041	4	6.00159	[ACVRL1, BMP4, BMP7, TGFBR1]
2	GO:0070830	bicellular tight junction assembly	Tissue & Cell Organization	0.0401983	4	3.3252	[ACVRL1, CLDN4, CLDN8, SLC39A9]
2	GO:0006885	regulation of pH	Metabolism, Transport & Homeostasis	0.00911365	6	4.34232	[CHP1, PDK2, SLC26A4, SLC26A6, SLC4A4, SLC9A3]
2	GO:0051453	regulation of intracellular pH	Metabolism, Transport & Homeostasis	0.0484998	4	3.07581	[CHP1, SLC26A6, SLC4A4, SLC9A3]
2	GO:0006820	monoatomic anion transport	Metabolism, Transport & Homeostasis	0.00907882	9	3.093	[ABCB1, BEST2, CLCN2, FXYD1, FXYD3, SLC12A7, SLC26A4, SLC26A6, SLC6A11]
2	GO:0015701	bicarbonate transport	Metabolism, Transport & Homeostasis	0.00415421	5	8.09424	[BEST2, CA4, SLC26A4, SLC26A6, SLC4A4]
2	GO:0098656	monoatomic anion transmembrane transport	Metabolism, Transport & Homeostasis	0.0119312	8	2.98261	[BEST2, CLCN2, FXYD1, FXYD3, SLC12A7, SLC26A4, SLC26A6, SLC6A11]
2	GO:0098661	inorganic anion transmembrane transport	Metabolism, Transport & Homeostasis	0.00883938	8	3.34782	[BEST2, CLCN2, FXYD1, FXYD3, SLC12A7, SLC26A4, SLC26A6, SLC6A11]
2	GO:0006821	chloride transport	Metabolism, Transport & Homeostasis	0.00461623	9	4.01193	[ABCB1, BEST2, CLCN2, FXYD1, FXYD3, SLC12A7, SLC26A4, SLC26A6, SLC6A11]
2	GO:0008509	monoatomic anion transmembrane transporter activity	Metabolism, Transport & Homeostasis	0.00928946	8	3.25914	[BEST2, CLCN2, FXYD1, FXYD3, SLC12A7, SLC26A4, SLC26A6, SLC6A11]
2	GO:0015103	inorganic anion transmembrane transporter activity	Metabolism, Transport & Homeostasis	0.0126433	8	2.92934	[BEST2, CLCN2, FXYD1, FXYD3, SLC12A7, SLC26A4, SLC26A6, SLC6A11]
2	GO:0015106	bicarbonate transmembrane transporter activity	Metabolism, Transport & Homeostasis	0.00654255	4	7.93758	[BEST2, SLC26A4, SLC26A6, SLC4A4]
2	GO:1902476	chloride transmembrane transport	Metabolism, Transport & Homeostasis	0.0063047	8	3.84477	[BEST2, CLCN2, FXYD1, FXYD3, SLC12A7, SLC26A4, SLC26A6, SLC6A11]
2	GO:0015108	chloride transmembrane transporter activity	Metabolism, Transport & Homeostasis	0.00584153	8	4.00106	[BEST2, CLCN2, FXYD1, FXYD3, SLC12A7, SLC26A4, SLC26A6, SLC6A11]
2	GO:0032088	negative regulation of NF-kappaB transcription factor activity	Defense & Immune Response	0.00565602	6	5.59239	[BMP7, BRMS1L, CHP1, FOXJ1, NLRC3, NLRP12]
2	GO:0032612	interleukin-1 production	Defense & Immune Response	0.0125258	6	3.6186	[CEACAM1, LPL, MEFV, NLRP12, NLRP3, TRIM16]
2	GO:0001818	negative regulation of cytokine production	Defense & Immune Response	0.0089419	11	2.69593	[CD34, CD84, CEACAM1, CUL3, FOXJ1, GBP1, MEFV, NLRC3, NLRP12, NLRP3, THBS1]
2	GO:0032611	interleukin-1 beta production	Defense & Immune Response	0.0217869	5	3.49524	[LPL, MEFV, NLRP12, NLRP3, TRIM16]
2	GO:0032652	regulation of interleukin-1 production	Defense & Immune Response	0.0125258	6	3.6186	[CEACAM1, LPL, MEFV, NLRP12, NLRP3, TRIM16]
2	GO:1901222	regulation of non-canonical NF-kappaB signal transduction	Defense & Immune Response	0.0475118	4	3.11475	[BMP7, NLRC3, NLRP12, NLRP3]
2	GO:0032692	negative regulation of interleukin-1 production	Defense & Immune Response	0.00654255	4	7.93758	[CEACAM1, MEFV, NLRP12, NLRP3]
2	GO:0032732	positive regulation of interleukin-1 production	Defense & Immune Response	0.0123856	5	4.33213	[LPL, MEFV, NLRP12, NLRP3, TRIM16]
2	GO:0043124	negative regulation of canonical NF-kappaB signal transduction	Defense & Immune Response	0.025853	4	3.90579	[NLRC3, NLRP12, NLRX1, TRIM39]
2	GO:1901223	negative regulation of non-canonical NF-kappaB signal transduction	Defense & Immune Response	0.0057694	4	8.78803	[BMP7, NLRC3, NLRP12, NLRP3]
2	GO:0032651	regulation of interleukin-1 beta production	Defense & Immune Response	0.0217869	5	3.49524	[LPL, MEFV, NLRP12, NLRP3, TRIM16]
2	GO:0032731	positive regulation of interleukin-1 beta production	Defense & Immune Response	0.00909005	5	5.04232	[LPL, MEFV, NLRP12, NLRP3, TRIM16]
2	GO:0043433	negative regulation of DNA-binding transcription factor activity	Tissue Growth & Development	0.0226725	6	3.00079	[BMP7, BRMS1L, CHP1, FOXJ1, NLRC3, NLRP12]
2	GO:0140115	export across plasma membrane	Metabolism, Transport & Homeostasis	0.0125309	5	4.27196	[ABCB1, ATP1A1, FXYD1, FXYD3, SLC4A4]
2	GO:0032411	positive regulation of transporter activity	Metabolism, Transport & Homeostasis	0.0327684	4	3.56616	[CHP1, DMD, EDNRA, SGK2]
2	GO:0015291	secondary active transmembrane transporter activity	Metabolism, Transport & Homeostasis	0.00905721	11	2.72854	[CHP1, MFSD1, SLC12A7, SLC26A4, SLC26A6, SLC4A4, SLC6A11, SLC7A5, SLC8A1, SLC9A3, SLCO5A1]
2	GO:0010765	positive regulation of sodium ion transport	Metabolism, Transport & Homeostasis	0.00341694	5	8.78803	[CHP1, DMD, FXYD1, FXYD3, GPD1L]
2	GO:0035725	sodium ion transmembrane transport	Metabolism, Transport & Homeostasis	0.00673015	11	2.96789	[ATP1A1, CHP1, DMD, FXYD1, FXYD3, GPD1L, SGK2, SLC4A4, SLC6A11, SLC8A1, SLC9A3]
2	GO:0036376	sodium ion export across plasma membrane	Metabolism, Transport & Homeostasis	0.00424153	4	11.7174	[ATP1A1, FXYD1, FXYD3, SLC4A4]
2	GO:0002028	regulation of sodium ion transport	Metabolism, Transport & Homeostasis	0.00346526	7	5.74152	[ATP1A1, CHP1, DMD, FXYD1, FXYD3, GPD1L, WNK4]
2	GO:0006814	sodium ion transport	Metabolism, Transport & Homeostasis	0.00586875	12	2.90628	[ATP1A1, CHP1, DMD, FXYD1, FXYD3, GPD1L, SGK2, SLC4A4, SLC6A11, SLC8A1, SLC9A3, WNK4]
2	GO:0016247	channel regulator activity	Metabolism, Transport & Homeostasis	0.0236077	7	2.65811	[CHP1, CLCN2, FXYD1, FXYD3, GPD1L, SGK2, WNK4]
2	GO:0015081	sodium ion transmembrane transporter activity	Metabolism, Transport & Homeostasis	0.0059334	11	3.11833	[ATP1A1, CHP1, DMD, FXYD1, FXYD3, GPD1L, SGK2, SLC4A4, SLC6A11, SLC8A1, SLC9A3]
2	GO:0099106	ion channel regulator activity	Metabolism, Transport & Homeostasis	0.0203091	7	2.79619	[CHP1, CLCN2, FXYD1, FXYD3, GPD1L, SGK2, WNK4]
2	GO:1902305	regulation of sodium ion transmembrane transport	Metabolism, Transport & Homeostasis	0.0163552	4	4.8248	[CHP1, DMD, FXYD1, FXYD3]
2	GO:1902307	positive regulation of sodium ion transmembrane transport	Metabolism, Transport & Homeostasis	0.00567878	4	9.8426	[CHP1, DMD, FXYD1, FXYD3]
2	GO:0017080	sodium channel regulator activity	Metabolism, Transport & Homeostasis	0.0103041	4	6.00159	[FXYD1, FXYD3, GPD1L, SGK2]
2	GO:2000146	negative regulation of cell motility	Tissue & Cell Organization	0.0092834	12	2.59016	[ACVR1C, ACVRL1, ADGRB1, BMP4, BRMS1L, GADD45A, IGFBP5, PIP5KL1, PTPRJ, SAP130, TGFBR1, THBS1]
2	GO:0050678	regulation of epithelial cell proliferation	Tissue Growth & Development	0.00146585	14	3.41757	[ACVRL1, ATP5F1A, BMP4, CEACAM1, COL4A3, FGFR1, MTSS1, MYC, NLRC3, PPP1R16B, SGPP2, SLC39A9, TGFBR1, THBS1]
2	GO:2000377	regulation of reactive oxygen species metabolic process	Metabolism, Transport & Homeostasis	0.048494	5	2.65156	[ADGRB1, BMP7, GADD45A, MPV17L, THBS1]
2	GO:0010324	membrane invagination	Tissue & Cell Organization	0.0226546	4	4.17059	[ADGRB1, CLCN2, FCHO2, THBS1]
2	GO:0030336	negative regulation of cell migration	Tissue & Cell Organization	0.00711301	12	2.70401	[ACVR1C, ACVRL1, ADGRB1, BMP4, BRMS1L, GADD45A, IGFBP5, PIP5KL1, PTPRJ, SAP130, TGFBR1, THBS1]
2	GO:0043534	blood vessel endothelial cell migration	Tissue Growth & Development	0.0491138	5	2.6289	[ACVRL1, ATP5F1A, FGFR1, GADD45A, THBS1]
2	GO:0050680	negative regulation of epithelial cell proliferation	Tissue & Cell Organization	0.00902443	6	4.2425	[ATP5F1A, CEACAM1, COL4A3, MTSS1, NLRC3, THBS1]
2	GO:0101023	vascular endothelial cell proliferation	Tissue Growth & Development	0.00557479	4	10.2527	[COL4A3, FGFR1, SLC39A9, TGFBR1]
2	GO:0150116	regulation of cell-substrate junction organization	Tissue & Cell Organization	0.0303813	4	3.67261	[ACVRL1, CAMSAP3, PTPRJ, THBS1]
2	GO:0001936	regulation of endothelial cell proliferation	Tissue Growth & Development	0.00589877	8	3.93704	[ACVRL1, ATP5F1A, COL4A3, FGFR1, PPP1R16B, SLC39A9, TGFBR1, THBS1]
2	GO:0010594	regulation of endothelial cell migration	Tissue & Cell Organization	0.013392	8	2.87795	[ACVRL1, ADGRB1, ATP5F1A, CEACAM1, FGFR1, GADD45A, PIK3CG, THBS1]
2	GO:1901342	regulation of vasculature development	Tissue Growth & Development	0.00656243	12	2.78564	[ADGRB1, AMOT, CD34, CEACAM1, COL4A2, COL4A3, EPN2, PIK3CG, PPP1R16B, RNH1, TGFBR1, THBS1]
2	GO:1901343	negative regulation of vasculature development	Tissue Growth & Development	0.0117544	6	3.7663	[ADGRB1, AMOT, COL4A2, COL4A3, EPN2, THBS1]
2	GO:0010596	negative regulation of endothelial cell migration	Tissue & Cell Organization	0.0175057	4	4.64274	[ACVRL1, ADGRB1, GADD45A, THBS1]
2	GO:0043491	phosphatidylinositol 3-kinase/protein kinase B signal transduction	Tissue Growth & Development	0.0140705	10	2.47053	[CEACAM1, FGFR1, NLRC3, PIK3CG, PIP5KL1, PPP1R16B, PTPRJ, TGFBR1, THBS1, UNC5B]
2	GO:0048041	focal adhesion assembly	Tissue & Cell Organization	0.0475118	4	3.11475	[ACVRL1, CAMSAP3, PTPRJ, THBS1]
2	GO:0090109	regulation of cell-substrate junction assembly	Tissue & Cell Organization	0.0247741	4	3.96879	[ACVRL1, CAMSAP3, PTPRJ, THBS1]
2	GO:0120193	tight junction organization	Tissue & Cell Organization	0.01966	5	3.6186	[ACVRL1, CLDN4, CLDN8, SLC39A9, TGFBR1]
2	GO:0043535	regulation of blood vessel endothelial cell migration	Tissue & Cell Organization	0.0232363	5	3.38001	[ACVRL1, ATP5F1A, FGFR1, GADD45A, THBS1]
2	GO:0051896	regulation of phosphatidylinositol 3-kinase/protein kinase B signal transduction	Tissue Growth & Development	0.00934347	10	2.75858	[CEACAM1, FGFR1, NLRC3, PIK3CG, PIP5KL1, PPP1R16B, PTPRJ, TGFBR1, THBS1, UNC5B]
2	GO:0090100	positive regulation of transmembrane receptor protein serine/threonine kinase signaling pathway	Tissue Growth & Development	0.0227458	5	3.41757	[ACVRL1, BMP4, BMP7, TGFBR1, THBS1]
2	GO:2000181	negative regulation of blood vessel morphogenesis	Tissue Growth & Development	0.0113796	6	3.80513	[ADGRB1, AMOT, COL4A2, COL4A3, EPN2, THBS1]
2	GO:2001237	negative regulation of extrinsic apoptotic signaling pathway	Defense & Immune Response	0.0446929	4	3.19565	[BMP4, TGFBR1, THBS1, UNC5B]
2	GO:0002040	sprouting angiogenesis	Tissue Growth & Development	0.0117737	7	3.31241	[ACVRL1, BMP4, CEACAM1, EPN2, PARVA, PPP1R16B, THBS1]
2	GO:0045765	regulation of angiogenesis	Tissue Growth & Development	0.00946312	11	2.61266	[ADGRB1, AMOT, CD34, CEACAM1, COL4A2, COL4A3, EPN2, PIK3CG, PPP1R16B, RNH1, THBS1]
2	GO:0051893	regulation of focal adhesion assembly	Tissue & Cell Organization	0.0247741	4	3.96879	[ACVRL1, CAMSAP3, PTPRJ, THBS1]
2	GO:0016525	negative regulation of angiogenesis	Tissue Growth & Development	0.0110128	6	3.84477	[ADGRB1, AMOT, COL4A2, COL4A3, EPN2, THBS1]
2	GO:0002043	blood vessel endothelial cell proliferation involved in sprouting angiogenesis	Tissue Growth & Development	0.00557479	4	10.2527	[ACVRL1, BMP4, PPP1R16B, THBS1]
2	GO:1903670	regulation of sprouting angiogenesis	Tissue Growth & Development	0.0103041	4	6.00159	[CEACAM1, EPN2, PPP1R16B, THBS1]
2	GO:0030282	bone mineralization	Metabolism, Transport & Homeostasis	0.0227458	5	3.41757	[BMP4, BMP7, FZD9, NOTUM, SLC8A1]
2	GO:0045778	positive regulation of ossification	Tissue Growth & Development	0.0146152	4	5.02173	[BMP4, BMP7, FZD9, SLC8A1]
2	GO:2000146	negative regulation of cell motility	Tissue & Cell Organization	0.0092834	12	2.59016	[ACVR1C, ACVRL1, ADGRB1, BMP4, BRMS1L, GADD45A, IGFBP5, PIP5KL1, PTPRJ, SAP130, TGFBR1, THBS1]
2	GO:0009792	embryo development ending in birth or egg hatching	Tissue Growth & Development	0.00943006	10	2.79619	[ACVR1C, BMP4, BMP7, CAMSAP3, COL2A1, DLX1, FGFR1, FOXI1, POLR1B, TGFBR1]
2	GO:0030323	respiratory tube development	Tissue Growth & Development	0.0193922	4	4.47391	[BAG6, BMP4, CCDC39, FOXJ1]
2	GO:0050678	regulation of epithelial cell proliferation	Tissue Growth & Development	0.00146585	14	3.41757	[ACVRL1, ATP5F1A, BMP4, CEACAM1, COL4A3, FGFR1, MTSS1, MYC, NLRC3, PPP1R16B, SGPP2, SLC39A9, TGFBR1, THBS1]
2	GO:0060541	respiratory system development	Tissue Growth & Development	0.00966323	5	4.80596	[BAG6, BMP4, CCDC39, DISP1, FOXJ1]
2	GO:0070167	regulation of biomineral tissue development	Tissue Growth & Development	0.0225215	5	3.45597	[BMP4, BMP7, FZD9, NOTUM, SLC8A1]
2	GO:0070169	positive regulation of biomineral tissue development	Tissue Growth & Development	0.0175057	4	4.64274	[BMP4, BMP7, FZD9, SLC8A1]
2	GO:0072001	renal system development	Tissue Growth & Development	0.00114279	12	4.44696	[BAG6, BMP4, BMP7, CD34, COL4A1, COL4A3, FOXJ1, IQGAP1, MTSS1, MYC, TGFBR1, WNK4]
2	GO:0072132	mesenchyme morphogenesis	Tissue & Cell Organization	0.00623711	5	6.68655	[ACVRL1, BMP4, BMP7, MYC, TGFBR1]
2	GO:0001822	kidney development	Tissue Growth & Development	0.00161861	11	4.22924	[BAG6, BMP4, BMP7, CD34, COL4A3, FOXJ1, IQGAP1, MTSS1, MYC, TGFBR1, WNK4]
2	GO:0002064	epithelial cell development	Tissue Growth & Development	0.0449258	5	2.72196	[BMP4, FOXJ1, IQGAP1, PPP1R16B, RFX3]
2	GO:0030324	lung development	Tissue Growth & Development	0.0175057	4	4.64274	[BAG6, BMP4, CCDC39, FOXJ1]
2	GO:0030336	negative regulation of cell migration	Tissue & Cell Organization	0.00711301	12	2.70401	[ACVR1C, ACVRL1, ADGRB1, BMP4, BRMS1L, GADD45A, IGFBP5, PIP5KL1, PTPRJ, SAP130, TGFBR1, THBS1]
2	GO:0030500	regulation of bone mineralization	Metabolism, Transport & Homeostasis	0.0109126	5	4.59076	[BMP4, BMP7, FZD9, NOTUM, SLC8A1]
2	GO:0030856	regulation of epithelial cell differentiation	Tissue Growth & Development	0.00906317	7	3.74447	[ACVRL1, AQP3, BMP4, CEACAM1, FOXJ1, RFX3, TRIM16]
2	GO:0043534	blood vessel endothelial cell migration	Tissue Growth & Development	0.0491138	5	2.6289	[ACVRL1, ATP5F1A, FGFR1, GADD45A, THBS1]
2	GO:0048705	skeletal system morphogenesis	Tissue Growth & Development	0.023734	5	3.34327	[BMP4, COL2A1, FGFR1, SOX6, TGFBR1]
2	GO:0051216	cartilage development	Tissue Growth & Development	0.0117544	6	3.7663	[ACVRL1, ADAMTS7, BMP4, COL2A1, SOX6, TGFBR1]
2	GO:0060562	epithelial tube morphogenesis	Tissue Growth & Development	0.0134519	8	2.86122	[ACVRL1, BMP4, BMP7, CCDC39, COL4A1, MTSS1, MYC, WNK4]
2	GO:0061326	renal tubule development	Tissue Growth & Development	0.00744287	5	5.59239	[BMP4, COL4A1, MTSS1, MYC, WNK4]
2	GO:0071560	cellular response to transforming growth factor beta stimulus	Defense & Immune Response	0.0171013	9	2.50519	[ACVRL1, BRMS1L, DLX1, SAP130, SOX6, TGFBR1, THBS1, ZFP36L2, ZMIZ1]
2	GO:0101023	vascular endothelial cell proliferation	Tissue Growth & Development	0.00557479	4	10.2527	[COL4A3, FGFR1, SLC39A9, TGFBR1]
2	GO:0150116	regulation of cell-substrate junction organization	Tissue & Cell Organization	0.0303813	4	3.67261	[ACVRL1, CAMSAP3, PTPRJ, THBS1]
2	GO:0072006	nephron development	Tissue Growth & Development	0.00133212	9	5.64945	[BMP4, BMP7, CD34, COL4A3, FOXJ1, IQGAP1, MTSS1, MYC, WNK4]
2	GO:0003279	cardiac septum development	Tissue Growth & Development	0.0315649	4	3.6186	[BMP4, BMP7, PARVA, TGFBR1]
2	GO:0032835	glomerulus development	Tissue Growth & Development	0.00149367	7	8.97112	[BMP4, BMP7, CD34, COL4A3, FOXJ1, IQGAP1, MTSS1]
2	GO:0001837	epithelial to mesenchymal transition	Tissue & Cell Organization	0.0207344	7	2.77815	[ACVRL1, BMP4, BMP7, FGFR1, POLR1B, TGFBR1, TRIM28]
2	GO:0001936	regulation of endothelial cell proliferation	Tissue Growth & Development	0.00589877	8	3.93704	[ACVRL1, ATP5F1A, COL4A3, FGFR1, PPP1R16B, SLC39A9, TGFBR1, THBS1]
2	GO:0002062	chondrocyte differentiation	Tissue Growth & Development	0.00913568	5	4.96099	[ACVRL1, ADAMTS7, BMP4, SOX6, TGFBR1]
2	GO:0030501	positive regulation of bone mineralization	Metabolism, Transport & Homeostasis	0.0119686	4	5.59239	[BMP4, BMP7, FZD9, SLC8A1]
2	GO:0030858	positive regulation of epithelial cell differentiation	Tissue & Cell Organization	0.00691347	5	5.80342	[ACVRL1, BMP4, FOXJ1, RFX3, TRIM16]
2	GO:0051153	regulation of striated muscle cell differentiation	Tissue Growth & Development	0.0184367	4	4.55676	[BMP4, CEACAM5, LMOD3, SOX6]
2	GO:0060993	kidney morphogenesis	Tissue Growth & Development	0.0193922	4	4.47391	[BMP4, FOXJ1, MYC, WNK4]
2	GO:0061005	cell differentiation involved in kidney development	Tissue Growth & Development	0.0103041	4	6.00159	[CD34, FOXJ1, IQGAP1, MTSS1]
2	GO:0061035	regulation of cartilage development	Tissue Growth & Development	0.00415421	5	8.09424	[ACVRL1, ADAMTS7, BMP4, SOX6, TGFBR1]
2	GO:0001656	metanephros development	Tissue Growth & Development	0.00643277	5	6.031	[BMP4, BMP7, CD34, FOXJ1, MYC]
2	GO:0001823	mesonephros development	Tissue Growth & Development	0.0168149	4	4.73202	[BMP4, BMP7, FOXJ1, MYC]
2	GO:0003197	endocardial cushion development	Tissue Growth & Development	0.0123537	4	5.46811	[ACVRL1, BMP4, BMP7, TGFBR1]
2	GO:0010596	negative regulation of endothelial cell migration	Tissue & Cell Organization	0.0175057	4	4.64274	[ACVRL1, ADGRB1, GADD45A, THBS1]
2	GO:0032330	regulation of chondrocyte differentiation	Tissue Growth & Development	0.00665925	4	8.20217	[ACVRL1, ADAMTS7, SOX6, TGFBR1]
2	GO:0043491	phosphatidylinositol 3-kinase/protein kinase B signal transduction	Tissue Growth & Development	0.0140705	10	2.47053	[CEACAM1, FGFR1, NLRC3, PIK3CG, PIP5KL1, PPP1R16B, PTPRJ, TGFBR1, THBS1, UNC5B]
2	GO:0048041	focal adhesion assembly	Tissue & Cell Organization	0.0475118	4	3.11475	[ACVRL1, CAMSAP3, PTPRJ, THBS1]
2	GO:0060411	cardiac septum morphogenesis	Tissue Growth & Development	0.0175057	4	4.64274	[BMP4, BMP7, PARVA, TGFBR1]
2	GO:0061333	renal tubule morphogenesis	Tissue Growth & Development	0.0059644	5	6.83514	[BMP4, COL4A1, MTSS1, MYC, WNK4]
2	GO:0072073	kidney epithelium development	Tissue Growth & Development	0.00124544	8	6.30936	[BMP4, BMP7, CD34, FOXJ1, IQGAP1, MTSS1, MYC, WNK4]
2	GO:0090109	regulation of cell-substrate junction assembly	Tissue & Cell Organization	0.0247741	4	3.96879	[ACVRL1, CAMSAP3, PTPRJ, THBS1]
2	GO:0120193	tight junction organization	Tissue & Cell Organization	0.01966	5	3.6186	[ACVRL1, CLDN4, CLDN8, SLC39A9, TGFBR1]
2	GO:0072009	nephron epithelium development	Tissue Growth & Development	0.002804	7	6.06498	[BMP4, CD34, FOXJ1, IQGAP1, MTSS1, MYC, WNK4]
2	GO:0072164	mesonephric tubule development	Tissue Growth & Development	0.0139807	4	5.12635	[BMP4, BMP7, FOXJ1, MYC]
2	GO:0003203	endocardial cushion morphogenesis	Tissue Growth & Development	0.0094595	4	6.30936	[ACVRL1, BMP4, BMP7, TGFBR1]
2	GO:0010586	miRNA metabolic process	Metabolism, Transport & Homeostasis	0.0257898	5	3.2377	[BMP4, MYC, TUT4, XPO5, ZNF512B]
2	GO:0035850	epithelial cell differentiation involved in kidney development	Tissue Growth & Development	0.0088778	4	6.65041	[CD34, FOXJ1, IQGAP1, MTSS1]
2	GO:0043535	regulation of blood vessel endothelial cell migration	Tissue & Cell Organization	0.0232363	5	3.38001	[ACVRL1, ATP5F1A, FGFR1, GADD45A, THBS1]
2	GO:0051896	regulation of phosphatidylinositol 3-kinase/protein kinase B signal transduction	Tissue Growth & Development	0.00934347	10	2.75858	[CEACAM1, FGFR1, NLRC3, PIK3CG, PIP5KL1, PPP1R16B, PTPRJ, TGFBR1, THBS1, UNC5B]
2	GO:0060395	SMAD protein signal transduction	Tissue Growth & Development	0.0155679	5	3.94335	[ACVRL1, BMP4, BMP7, TGFBR1, ZMIZ1]
2	GO:0090100	positive regulation of transmembrane receptor protein serine/threonine kinase signaling pathway	Tissue Growth & Development	0.0227458	5	3.41757	[ACVRL1, BMP4, BMP7, TGFBR1, THBS1]
2	GO:2001237	negative regulation of extrinsic apoptotic signaling pathway	Defense & Immune Response	0.0446929	4	3.19565	[BMP4, TGFBR1, THBS1, UNC5B]
2	GO:0002040	sprouting angiogenesis	Tissue Growth & Development	0.0117737	7	3.31241	[ACVRL1, BMP4, CEACAM1, EPN2, PARVA, PPP1R16B, THBS1]
2	GO:0051893	regulation of focal adhesion assembly	Tissue & Cell Organization	0.0247741	4	3.96879	[ACVRL1, CAMSAP3, PTPRJ, THBS1]
2	GO:0060390	regulation of SMAD protein signal transduction	Tissue Growth & Development	0.025853	4	3.90579	[ACVRL1, BMP4, BMP7, TGFBR1]
2	GO:0072080	nephron tubule development	Tissue Growth & Development	0.0184367	4	4.55676	[BMP4, MTSS1, MYC, WNK4]
2	GO:0072163	mesonephric epithelium development	Tissue Growth & Development	0.0139807	4	5.12635	[BMP4, BMP7, FOXJ1, MYC]
2	GO:0001657	ureteric bud development	Tissue Growth & Development	0.0133599	4	5.23543	[BMP4, BMP7, FOXJ1, MYC]
2	GO:0060391	positive regulation of SMAD protein signal transduction	Tissue Growth & Development	0.0103041	4	6.00159	[ACVRL1, BMP4, BMP7, TGFBR1]
2	GO:0002043	blood vessel endothelial cell proliferation involved in sprouting angiogenesis	Tissue Growth & Development	0.00557479	4	10.2527	[ACVRL1, BMP4, PPP1R16B, THBS1]
2	GO:1903670	regulation of sprouting angiogenesis	Tissue Growth & Development	0.0103041	4	6.00159	[CEACAM1, EPN2, PPP1R16B, THBS1]
3	GO:0045010	actin nucleation	Tissue Growth & Development	0.00617559	4	7.50165	[CARMIL3, GSN, PICK1, TRIM27]
3	GO:0022617	extracellular matrix disassembly	Tissue & Cell Organization	0.00598777	4	6.70602	[GSN, LAMC1, MMP9, NCAPG]
3	GO:0038202	TORC1 signaling	Regulation & Signalling	0.00667765	5	4.76937	[ATXN3, CASTOR2, GPI, PRKAA1, SAR1A]
3	GO:0032007	negative regulation of TOR signaling	Regulation & Signalling	0.00348782	5	7.27956	[ATXN3, CASTOR2, GPI, PRKAA1, SAR1A]
3	GO:1903432	regulation of TORC1 signaling	Regulation & Signalling	0.00591202	5	5.31968	[ATXN3, CASTOR2, GPI, PRKAA1, SAR1A]
3	GO:1904262	negative regulation of TORC1 signaling	Regulation & Signalling	0.00116692	5	10.2453	[ATXN3, CASTOR2, GPI, PRKAA1, SAR1A]
3	GO:0010586	miRNA metabolic process	Metabolism, Transport & Homeostasis	0.0112191	4	4.65892	[MRTFB, NCOR2, NR3C1, SPI1]
3	GO:2000628	regulation of miRNA metabolic process	Metabolism, Transport & Homeostasis	0.00830402	4	5.46417	[MRTFB, NCOR2, NR3C1, SPI1]
3	GO:0061614	miRNA transcription	Metabolism, Transport & Homeostasis	0.0063764	4	6.14719	[MRTFB, NCOR2, NR3C1, SPI1]
3	GO:1902893	regulation of miRNA transcription	Metabolism, Transport & Homeostasis	0.0063764	4	6.14719	[MRTFB, NCOR2, NR3C1, SPI1]
3	GO:0009134	nucleoside diphosphate catabolic process	Metabolism, Transport & Homeostasis	0.0116131	4	4.56286	[ALDOA, GPI, PRKAA1, ZBTB20]
3	GO:0019364	pyridine nucleotide catabolic process	Metabolism, Transport & Homeostasis	0.010857	4	4.81084	[ALDOA, GPI, PRKAA1, ZBTB20]
3	GO:0006090	pyruvate metabolic process	Metabolism, Transport & Homeostasis	0.0081912	5	4.42597	[ALDOA, DLAT, GPI, PRKAA1, ZBTB20]
3	GO:0006096	glycolytic process	Metabolism, Transport & Homeostasis	0.0105847	4	5.02952	[ALDOA, GPI, PRKAA1, ZBTB20]
3	GO:0009137	purine nucleoside diphosphate catabolic process	Metabolism, Transport & Homeostasis	0.0109418	4	4.91775	[ALDOA, GPI, PRKAA1, ZBTB20]
3	GO:0009191	ribonucleoside diphosphate catabolic process	Metabolism, Transport & Homeostasis	0.0108336	4	4.75911	[ALDOA, GPI, PRKAA1, ZBTB20]
3	GO:0046031	ADP metabolic process	Metabolism, Transport & Homeostasis	0.0108926	4	4.86371	[ALDOA, GPI, PRKAA1, ZBTB20]
3	GO:0009181	purine ribonucleoside diphosphate catabolic process	Metabolism, Transport & Homeostasis	0.0109418	4	4.91775	[ALDOA, GPI, PRKAA1, ZBTB20]
3	GO:0046032	ADP catabolic process	Metabolism, Transport & Homeostasis	0.0105847	4	5.02952	[ALDOA, GPI, PRKAA1, ZBTB20]
3	GO:0050851	antigen receptor-mediated signaling pathway	Defense & Immune Response	0.00198953	9	5.10689	[BAX, BTN3A1, CD22, CD247, FOXP1, FYB1, IGKC, NCOR2, THEMIS]
3	GO:0050853	B cell receptor signaling pathway	Defense & Immune Response	0.00691483	4	6.32282	[BAX, CD22, FOXP1, IGKC]
3	GO:1901222	regulation of non-canonical NF-kappaB signal transduction	Defense & Immune Response	0.00798404	4	5.6025	[HDAC7, NLRC3, NLRP12, SPI1]
3	GO:1901223	negative regulation of non-canonical NF-kappaB signal transduction	Defense & Immune Response	0.00155308	4	15.807	[HDAC7, NLRC3, NLRP12, SPI1]
3	GO:0046718	symbiont entry into host cell	Defense & Immune Response	0.00568908	5	5.26902	[CLEC4M, GSN, MID2, TRIM11, TRIM25]
3	GO:0052372	modulation by symbiont of entry into host	Defense & Immune Response	0.00363688	4	9.62168	[GSN, MID2, TRIM11, TRIM25]
3	GO:0046596	regulation of viral entry into host cell	Defense & Immune Response	0.00288776	4	11.3487	[GSN, MID2, TRIM11, TRIM25]
3	GO:0032640	tumor necrosis factor production	Defense & Immune Response	0.00636125	6	4.48578	[BPI, FOXP1, ILRUN, NLRC3, TMEM106A, TRIM27]
3	GO:1903556	negative regulation of tumor necrosis factor superfamily cytokine production	Defense & Immune Response	0.00535346	4	8.04723	[BPI, ILRUN, NLRC3, TRIM27]
3	GO:0032680	regulation of tumor necrosis factor production	Defense & Immune Response	0.00636125	6	4.48578	[BPI, FOXP1, ILRUN, NLRC3, TMEM106A, TRIM27]
3	GO:0032720	negative regulation of tumor necrosis factor production	Defense & Immune Response	0.00532686	4	8.35089	[BPI, ILRUN, NLRC3, TRIM27]
3	GO:0032612	interleukin-1 production	Defense & Immune Response	0.00592597	5	5.42399	[FOXP1, NLRP12, SAA2, TMEM106A, TRIM16]
3	GO:0032611	interleukin-1 beta production	Defense & Immune Response	0.0105847	4	5.02952	[FOXP1, NLRP12, TMEM106A, TRIM16]
3	GO:0032652	regulation of interleukin-1 production	Defense & Immune Response	0.00592597	5	5.42399	[FOXP1, NLRP12, SAA2, TMEM106A, TRIM16]
3	GO:0032732	positive regulation of interleukin-1 production	Defense & Immune Response	0.00682213	4	6.23377	[NLRP12, SAA2, TMEM106A, TRIM16]
3	GO:0032651	regulation of interleukin-1 beta production	Defense & Immune Response	0.0105847	4	5.02952	[FOXP1, NLRP12, TMEM106A, TRIM16]
4	GO:0001501	skeletal system development	Tissue Growth & Development	6.8072e-05	13	4.4124	[ACAN, CNMD, COL10A1, COL1A2, COL27A1, COL2A1, COL9A2, FGF2, HAPLN1, IHH, NCAN, SNORC, SULF2]
4	GO:0045667	regulation of osteoblast differentiation	Tissue Growth & Development	0.0145475	4	4.26693	[BAMBI, SMOC1, TRPM4, WNT4]
4	GO:0050796	regulation of insulin secretion	Metabolism, Transport & Homeostasis	0.00638333	5	4.58508	[ADCY8, C1QTNF1, PRKN, SLC25A22, TRPM4]
4	GO:0061041	regulation of wound healing	Defense & Immune Response	0.0070258	5	4.31983	[C1QTNF1, ENPP4, FGF2, ITGB1, OCLN]
4	GO:0090288	negative regulation of cellular response to growth factor stimulus	Tissue Growth & Development	0.00321216	5	5.74395	[ANGPT1, BAMBI, FGF2, LRP2, SULF2]
4	GO:2001235	positive regulation of apoptotic signaling pathway	Defense & Immune Response	0.0145475	4	4.26693	[G0S2, NCK1, SLC9A3R1, TRIM39]
4	GO:0035296	regulation of tube diameter	Tissue Growth & Development	0.00918121	4	4.97809	[ADRB3, ATP2B1, ITGB1, TRPM4]
4	GO:0097746	blood vessel diameter maintenance	Metabolism, Transport & Homeostasis	0.00918121	4	4.97809	[ADRB3, ATP2B1, ITGB1, TRPM4]
4	GO:0030198	extracellular matrix organization	Tissue & Cell Organization	4.8391e-05	12	5.29316	[COL11A1, COL1A2, COL2A1, COL5A2, HAS3, HMCN1, ITGB1, LAMB2, LOXL4, MATN1, SMOC1, SULF2]
4	GO:0030199	collagen fibril organization	Tissue & Cell Organization	0.000435687	5	10.0519	[COL11A1, COL1A2, COL2A1, COL5A2, LOXL4]
4	GO:0044344	cellular response to fibroblast growth factor stimulus	Tissue Growth & Development	0.000382904	6	7.5571	[FGF10, FGF2, FGFBP3, ITGB1, SHOC2, SULF2]
4	GO:0051216	cartilage development	Tissue Growth & Development	0.0145475	4	4.26693	[COL2A1, FGF2, SNORC, SULF2]
4	GO:0040036	regulation of fibroblast growth factor receptor signaling pathway	Tissue Growth & Development	0.000349065	4	16.7264	[FGF2, FGFBP3, ITGB1, SULF2]
4	GO:0008543	fibroblast growth factor receptor signaling pathway	Tissue Growth & Development	0.000176635	6	9.80061	[FGF10, FGF2, FGFBP3, ITGB1, SHOC2, SULF2]
4	GO:0006023	aminoglycan biosynthetic process	Metabolism, Transport & Homeostasis	0.00693558	4	5.88957	[ANGPT1, CHST11, CSGALNACT1, HAS3]
4	GO:0030203	glycosaminoglycan metabolic process	Metabolism, Transport & Homeostasis	0.0025307	5	6.22261	[ANGPT1, CHST11, CSGALNACT1, FGF2, HAS3]
4	GO:0006029	proteoglycan metabolic process	Metabolism, Transport & Homeostasis	0.00679811	4	5.6508	[CHST11, CNMD, CSGALNACT1, SULF2]
4	GO:0006024	glycosaminoglycan biosynthetic process	Metabolism, Transport & Homeostasis	0.00619803	4	6.24119	[ANGPT1, CHST11, CSGALNACT1, HAS3]
4	GO:1903510	mucopolysaccharide metabolic process	Metabolism, Transport & Homeostasis	0.000773424	5	8.29682	[ANGPT1, CHST11, CSGALNACT1, FGF2, HAS3]
5	GO:0050680	negative regulation of epithelial cell proliferation	Tissue & Cell Organization	0.00426924	4	6.52874	[COL4A3, MEF2C, NLRC3, THBS1]
5	GO:0060348	bone development	Tissue Growth & Development	0.00093065	6	8.03774	[ATP6AP1, FBN1, MBTPS2, MEF2C, MMP13, XYLT1]
5	GO:0072006	nephron development	Tissue Growth & Development	0.00507966	4	5.79592	[COL4A3, MEF2C, NPHS2, TEK]
5	GO:0032835	glomerulus development	Tissue Growth & Development	0.0016122	4	11.8333	[COL4A3, MEF2C, NPHS2, TEK]
5	GO:0150115	cell-substrate junction organization	Tissue & Cell Organization	0.00439001	4	6.24176	[LDB1, PEAK1, TEK, THBS1]
5	GO:0150116	regulation of cell-substrate junction organization	Tissue & Cell Organization	0.0028653	4	8.47761	[LDB1, PEAK1, TEK, THBS1]
5	GO:0007044	cell-substrate junction assembly	Tissue & Cell Organization	0.00457975	4	6.68235	[LDB1, PEAK1, TEK, THBS1]
5	GO:0048041	focal adhesion assembly	Tissue & Cell Organization	0.00421191	4	7.18987	[LDB1, PEAK1, TEK, THBS1]
5	GO:0090109	regulation of cell-substrate junction assembly	Tissue & Cell Organization	0.00285659	4	9.16129	[LDB1, PEAK1, TEK, THBS1]
5	GO:0051893	regulation of focal adhesion assembly	Tissue & Cell Organization	0.00285659	4	9.16129	[LDB1, PEAK1, TEK, THBS1]
6	GO:0030219	megakaryocyte differentiation	Defense & Immune Response	0.0313013	4	3.77137	[GATA1, GP1BA, TAL1, ZFPM1]
6	GO:0032088	negative regulation of NF-kappaB transcription factor activity	Defense & Immune Response	0.0192822	5	3.78566	[ACOD1, CD200, CHUK, CYP1B1, TRIM21]
6	GO:0034142	toll-like receptor 4 signaling pathway	Defense & Immune Response	0.0452996	4	3.22391	[ACOD1, CHUK, NR1D1, RPSA]
6	GO:1990868	response to chemokine	Defense & Immune Response	0.0180206	6	3.33138	[ACKR3, FOXC1, MPL, SLIT1, STK39, XCR1]
6	GO:0070098	chemokine-mediated signaling pathway	Defense & Immune Response	0.0131702	6	3.65639	[ACKR3, FOXC1, MPL, SLIT1, STK39, XCR1]
6	GO:0004896	cytokine receptor activity	Defense & Immune Response	0.00940948	7	3.53328	[ACKR3, EPOR, IFNGR1, IL17REL, IL20RA, MPL, XCR1]
6	GO:1990869	cellular response to chemokine	Defense & Immune Response	0.0180206	6	3.33138	[ACKR3, FOXC1, MPL, SLIT1, STK39, XCR1]
6	GO:0071674	mononuclear cell migration	Defense & Immune Response	0.0484145	8	2.08211	[APOD, CCL20, CD200, LGALS3, MICOS10-NBL1, PTK2, STK39, TRPM4]
6	GO:0071675	regulation of mononuclear cell migration	Defense & Immune Response	0.0211183	7	2.84386	[APOD, CCL20, CD200, LGALS3, MICOS10-NBL1, PTK2, STK39]
6	GO:0072678	T cell migration	Defense & Immune Response	0.0464501	4	3.17274	[APOD, CCL20, CD200, STK39]
6	GO:2000401	regulation of lymphocyte migration	Defense & Immune Response	0.0386035	4	3.44625	[APOD, CCL20, CD200, STK39]
6	GO:2000404	regulation of T cell migration	Defense & Immune Response	0.0172421	4	4.87519	[APOD, CCL20, CD200, STK39]
6	GO:0010001	glial cell differentiation	Defense & Immune Response	0.0379876	6	2.60717	[IFNGR1, MYRF, NOG, NR1D1, PTPRZ1, SLC8A3]
6	GO:0019229	regulation of vasoconstriction	Defense & Immune Response	0.0117622	4	5.71093	[ADRA1A, ATP2B1, SVEP1, TRPM4]
6	GO:0010508	positive regulation of autophagy	Metabolism, Transport & Homeostasis	0.0451205	7	2.27139	[ADRB2, DEPTOR, FOXO1, RAB3GAP1, RNF152, SLC6A4, TRIM21]
6	GO:0030258	lipid modification	Metabolism, Transport & Homeostasis	0.031302	8	2.35156	[ABO, ACAD11, APOD, CPT1A, CROT, CYP1A1, PPARGC1A, ST3GAL2]
6	GO:0051932	synaptic transmission, GABAergic	Metabolism, Transport & Homeostasis	0.016116	4	4.99707	[ADRA1A, GABRA4, KCNK2, PLCL1]
6	GO:0006470	protein dephosphorylation	Metabolism, Transport & Homeostasis	0.0234075	6	3.05943	[DUSP28, PTPRB, PTPRN2, PTPRT, PTPRZ1, SSH2]
6	GO:0009123	nucleoside monophosphate metabolic process	Metabolism, Transport & Homeostasis	0.0184566	5	3.8439	[ACOD1, DLG2, MAGI3, NT5C2, UCKL1]
6	GO:0009161	ribonucleoside monophosphate metabolic process	Metabolism, Transport & Homeostasis	0.00760347	5	5.20528	[ACOD1, DLG2, MAGI3, NT5C2, UCKL1]
6	GO:0042326	negative regulation of phosphorylation	Metabolism, Transport & Homeostasis	0.0448249	8	2.13778	[CEP85, DEPTOR, DMTN, HEG1, PTPRT, SFRP2, SLC8A1, SLC8A3]
6	GO:0001933	negative regulation of protein phosphorylation	Metabolism, Transport & Homeostasis	0.0302828	8	2.37956	[CEP85, DEPTOR, DMTN, HEG1, PTPRT, SFRP2, SLC8A1, SLC8A3]
6	GO:0006469	negative regulation of protein kinase activity	Metabolism, Transport & Homeostasis	0.0454247	6	2.45757	[CEP85, DEPTOR, HEG1, PTPRT, SLC8A1, SLC8A3]
6	GO:1990778	protein localization to cell periphery	Metabolism, Transport & Homeostasis	0.0251736	12	2.03962	[ANK3, ATP1B1, CACNB3, CAMK2B, GOLGA4, GPC6, IQSEC2, LGALS3, MACF1, MISP, PPP2R5A, WNK4]
6	GO:1904375	regulation of protein localization to cell periphery	Metabolism, Transport & Homeostasis	0.0223992	7	2.79836	[CAMK2B, GPC6, IQSEC2, LGALS3, MISP, PPP2R5A, WNK4]
6	GO:1905475	regulation of protein localization to membrane	Metabolism, Transport & Homeostasis	0.0228937	8	2.5626	[ANK3, CAMK2B, DMTN, GPC6, IQSEC2, LGALS3, PPP2R5A, WNK4]
6	GO:0050848	regulation of calcium-mediated signaling	Metabolism, Transport & Homeostasis	0.0131702	6	3.65639	[CAMTA1, CD22, HOMER2, P2RX3, SLC24A4, SLC6A4]
6	GO:0097553	calcium ion transmembrane import into cytosol	Metabolism, Transport & Homeostasis	0.00114861	12	3.52734	[CACNA1H, CACNB3, CLIC2, GP1BA, GRIN2B, P2RX3, PLCL1, SLC24A4, SLC6A4, SLC8A1, SLC8A3, TRPV6]
6	GO:0099094	ligand-gated monoatomic cation channel activity	Metabolism, Transport & Homeostasis	0.0119604	9	2.79339	[CHRNA10, CLIC2, CNGA2, GRIN2B, KCNJ1, KCNN2, P2RX3, SLC6A4, TRPM4]
6	GO:0046189	phenol-containing compound biosynthetic process	Metabolism, Transport & Homeostasis	0.014274	4	5.26007	[DCT, OCA2, TPH1, TYR]
6	GO:0009072	aromatic amino acid metabolic process	Metabolism, Transport & Homeostasis	0.0125413	4	5.5523	[DCT, IL4I1, OCA2, TYR]
6	GO:1902221	erythrose 4-phosphate/phosphoenolpyruvate family amino acid metabolic process	Metabolism, Transport & Homeostasis	0.00382454	4	8.69055	[DCT, IL4I1, OCA2, TYR]
6	GO:0006570	tyrosine metabolic process	Metabolism, Transport & Homeostasis	0.00145137	4	12.4927	[DCT, IL4I1, OCA2, TYR]
6	GO:0003007	heart morphogenesis	Metabolism, Transport & Homeostasis	0.0222504	9	2.41794	[CCDC39, HAND2, MICAL2, NOG, PTK2, SFRP2, SLIT1, TBX3, ZFPM1]
6	GO:0006820	monoatomic anion transport	Metabolism, Transport & Homeostasis	0.00021807	14	3.90832	[ABCB1, ABCC1, ABCC2, CLCN2, CLIC2, GABRA4, KCNK2, LRRC8C, OCA2, SLC12A3, SLC26A6, SLC4A1, SLC4A8, SLC6A4]
6	GO:0046942	carboxylic acid transport	Metabolism, Transport & Homeostasis	0.00465981	16	2.37249	[ABCB1, ABCC1, ABCC2, ABCG2, CPT1A, GRIN2B, KCNK2, LRRC8C, PSAP, RAB3GAP1, SHANK1, SLC16A5, SLC26A6, SLC2A1, SLC51A, STK39]
6	GO:0098656	monoatomic anion transmembrane transport	Metabolism, Transport & Homeostasis	0.000387489	13	3.93708	[ABCC1, ABCC2, CLCN2, CLIC2, GABRA4, KCNK2, LRRC8C, OCA2, SLC12A3, SLC26A6, SLC4A1, SLC4A8, SLC6A4]
6	GO:1901682	sulfur compound transmembrane transporter activity	Metabolism, Transport & Homeostasis	0.0402387	4	3.38784	[ABCC1, ABCC2, ABCG2, SLC26A6]
6	GO:0006835	dicarboxylic acid transport	Metabolism, Transport & Homeostasis	0.0225174	5	3.56933	[ABCC2, KCNK2, LRRC8C, RAB3GAP1, SLC26A6]
6	GO:1990806	ligand-gated ion channel signaling pathway	Metabolism, Transport & Homeostasis	0.0402387	4	3.38784	[ADRB2, DLG4, GRIN2B, SHANK1]
6	GO:0035235	ionotropic glutamate receptor signaling pathway	Metabolism, Transport & Homeostasis	0.0326512	4	3.70153	[ADRB2, DLG4, GRIN2B, SHANK1]
6	GO:0035418	protein localization to synapse	Metabolism, Transport & Homeostasis	0.00906372	5	4.89909	[DLG2, DLG4, GPC6, IQSEC2, SHANK1]
6	GO:0098815	modulation of excitatory postsynaptic potential	Metabolism, Transport & Homeostasis	0.0117622	4	5.71093	[DLG4, GRIN2B, SHANK1, SLC8A3]
6	GO:0003007	heart morphogenesis	Metabolism, Transport & Homeostasis	0.0222504	9	2.41794	[CCDC39, HAND2, MICAL2, NOG, PTK2, SFRP2, SLIT1, TBX3, ZFPM1]
6	GO:1903825	organic acid transmembrane transport	Metabolism, Transport & Homeostasis	0.00496067	13	2.63004	[ABCB1, ABCC1, ABCC2, ABCG2, CPT1A, GRIN2B, LRRC8C, SHANK1, SLC16A5, SLC26A6, SLC29A4, SLC2A1, STK39]
6	GO:0005342	organic acid transmembrane transporter activity	Metabolism, Transport & Homeostasis	0.0101461	11	2.55664	[ABCB1, ABCC1, ABCC2, ABCG2, GRIN2B, SHANK1, SLC16A5, SLC26A6, SLC29A4, SLC2A1, STK39]
6	GO:0008514	organic anion transmembrane transporter activity	Metabolism, Transport & Homeostasis	0.0258582	12	2.02584	[ABCB1, ABCC1, ABCC2, ABCG2, GRIN2B, SHANK1, SLC16A5, SLC26A6, SLC2A1, SLC4A1, SLC4A8, STK39]
6	GO:0046942	carboxylic acid transport	Metabolism, Transport & Homeostasis	0.00465981	16	2.37249	[ABCB1, ABCC1, ABCC2, ABCG2, CPT1A, GRIN2B, KCNK2, LRRC8C, PSAP, RAB3GAP1, SHANK1, SLC16A5, SLC26A6, SLC2A1, SLC51A, STK39]
6	GO:1905039	carboxylic acid transmembrane transport	Metabolism, Transport & Homeostasis	0.0101618	12	2.43759	[ABCB1, ABCC1, ABCC2, ABCG2, CPT1A, GRIN2B, LRRC8C, SHANK1, SLC16A5, SLC26A6, SLC2A1, STK39]
6	GO:0006835	dicarboxylic acid transport	Metabolism, Transport & Homeostasis	0.0225174	5	3.56933	[ABCC2, KCNK2, LRRC8C, RAB3GAP1, SLC26A6]
6	GO:0015718	monocarboxylic acid transport	Metabolism, Transport & Homeostasis	0.023749	8	2.53016	[ABCC2, ABCG2, CPT1A, SLC16A5, SLC26A6, SLC2A1, SLC51A, STK39]
6	GO:0046943	carboxylic acid transmembrane transporter activity	Metabolism, Transport & Homeostasis	0.0204889	10	2.33508	[ABCB1, ABCC1, ABCC2, ABCG2, GRIN2B, SHANK1, SLC16A5, SLC26A6, SLC2A1, STK39]
6	GO:0055078	sodium ion homeostasis	Metabolism, Transport & Homeostasis	0.0117622	4	5.71093	[ATP1B1, SLC12A3, SLC8A1, SLC9B2]
6	GO:0099587	inorganic ion import across plasma membrane	Metabolism, Transport & Homeostasis	0.00269466	9	3.8439	[ATP1B1, CACNA1H, KCNJ1, SLC12A3, SLC24A4, SLC8A1, SLC8A3, TRPM4, TRPV6]
6	GO:0022853	active monoatomic ion transmembrane transporter activity	Metabolism, Transport & Homeostasis	0.00543627	14	2.48081	[ATP1B1, ATP2B1, NDUFS8, SLC12A3, SLC24A4, SLC24A5, SLC26A6, SLC4A1, SLC4A8, SLC5A7, SLC6A4, SLC8A1, SLC8A3, SLC9B2]
6	GO:0098659	inorganic cation import across plasma membrane	Metabolism, Transport & Homeostasis	0.00269466	9	3.8439	[ATP1B1, CACNA1H, KCNJ1, SLC12A3, SLC24A4, SLC8A1, SLC8A3, TRPM4, TRPV6]
6	GO:0035725	sodium ion transmembrane transport	Metabolism, Transport & Homeostasis	0.00134308	14	3.06837	[ANK3, ATP1B1, CNNM4, SLC12A3, SLC24A4, SLC24A5, SLC4A8, SLC5A7, SLC6A4, SLC8A1, SLC8A3, SLC9B2, STK39, TRPM4]
6	GO:0086064	cell communication by electrical coupling involved in cardiac conduction	Metabolism, Transport & Homeostasis	0.00668805	4	7.13867	[ATP1B1, GJD3, IRX3, SLC8A1]
6	GO:0015081	sodium ion transmembrane transporter activity	Metabolism, Transport & Homeostasis	0.00091858	14	3.22391	[ANK3, ATP1B1, CNNM4, SLC12A3, SLC24A4, SLC24A5, SLC4A8, SLC5A7, SLC6A4, SLC8A1, SLC8A3, SLC9B2, STK39, TRPM4]
6	GO:0140828	metal cation:monoatomic cation antiporter activity	Metabolism, Transport & Homeostasis	0.00422118	5	6.24633	[SLC24A4, SLC24A5, SLC8A1, SLC8A3, SLC9B2]
6	GO:0006805	xenobiotic metabolic process	Metabolism, Transport & Homeostasis	0.0312241	7	2.53474	[ABCB1, ABCC1, ABCC2, CYP1A1, CYP1B1, CYP2J2, UGT1A1]
6	GO:0042910	xenobiotic transmembrane transporter activity	Metabolism, Transport & Homeostasis	0.00149564	5	8.61563	[ABCB1, ABCC1, ABCC2, ABCG2, SLC29A4]
6	GO:1990962	xenobiotic transport across blood-brain barrier	Metabolism, Transport & Homeostasis	9.81494e-05	4	33.3138	[ABCB1, ABCC1, ABCC2, ABCG2]
6	GO:0042626	ATPase-coupled transmembrane transporter activity	Metabolism, Transport & Homeostasis	0.0246813	6	2.99824	[ABCB1, ABCC1, ABCC2, ABCG2, ATP1B1, ATP2B1]
6	GO:0008559	ABC-type xenobiotic transporter activity	Metabolism, Transport & Homeostasis	0.000517003	4	18.1712	[ABCB1, ABCC1, ABCC2, ABCG2]
6	GO:0019369	arachidonate metabolic process	Metabolism, Transport & Homeostasis	0.0301236	4	3.8439	[ABHD12, CYP1A1, CYP1B1, CYP2J2]
6	GO:0001676	long-chain fatty acid metabolic process	Metabolism, Transport & Homeostasis	0.0300628	6	2.82853	[ABHD12, ACSBG2, CPT1A, CYP1A1, CYP1B1, CYP2J2]
6	GO:0140359	ABC-type transporter activity	Metabolism, Transport & Homeostasis	0.0053644	4	7.6878	[ABCB1, ABCC1, ABCC2, ABCG2]
6	GO:0006643	membrane lipid metabolic process	Metabolism, Transport & Homeostasis	0.000910871	13	3.41905	[ABCC1, ABCG2, B4GALNT1, CERK, CERS2, CERS3, CSNK1G2, CYP1B1, MPPE1, SERINC1, ST3GAL2, TLCD3B, UGT8]
6	GO:0006672	ceramide metabolic process	Metabolism, Transport & Homeostasis	0.0101687	7	3.46331	[B4GALNT1, CERK, CERS2, CERS3, ST3GAL2, TLCD3B, UGT8]
6	GO:0046467	membrane lipid biosynthetic process	Metabolism, Transport & Homeostasis	0.000943725	11	3.92627	[ABCC1, ABCG2, B4GALNT1, CERK, CERS2, CERS3, CSNK1G2, MPPE1, ST3GAL2, TLCD3B, UGT8]
6	GO:0006665	sphingolipid metabolic process	Metabolism, Transport & Homeostasis	0.00137442	11	3.66452	[ABCC1, ABCG2, B4GALNT1, CERK, CERS2, CERS3, CSNK1G2, SERINC1, ST3GAL2, TLCD3B, UGT8]
6	GO:0009247	glycolipid biosynthetic process	Metabolism, Transport & Homeostasis	0.0234336	5	3.51906	[B4GALNT1, CERK, MPPE1, ST3GAL2, UGT8]
6	GO:0006687	glycosphingolipid metabolic process	Metabolism, Transport & Homeostasis	0.0452996	4	3.22391	[B4GALNT1, CERK, ST3GAL2, UGT8]
6	GO:0030148	sphingolipid biosynthetic process	Metabolism, Transport & Homeostasis	0.000568747	10	4.67016	[ABCC1, ABCG2, B4GALNT1, CERK, CERS2, CERS3, CSNK1G2, ST3GAL2, TLCD3B, UGT8]
6	GO:0046513	ceramide biosynthetic process	Metabolism, Transport & Homeostasis	0.00636004	6	4.54279	[B4GALNT1, CERS2, CERS3, ST3GAL2, TLCD3B, UGT8]
6	GO:0006688	glycosphingolipid biosynthetic process	Metabolism, Transport & Homeostasis	0.014274	4	5.26007	[B4GALNT1, CERK, ST3GAL2, UGT8]
6	GO:0034764	positive regulation of transmembrane transport	Metabolism, Transport & Homeostasis	0.0353071	8	2.27139	[AKAP7, ANK3, ATP1B1, CACNB3, P2RX3, SLC26A6, SLC6A4, STK39]
6	GO:0043270	positive regulation of monoatomic ion transport	Metabolism, Transport & Homeostasis	0.0146158	9	2.66116	[AKAP7, ANK3, ATP1B1, ATP2B1, CACNB3, LGALS3, P2RX3, SLC6A4, STK39]
6	GO:0034767	positive regulation of monoatomic ion transmembrane transport	Metabolism, Transport & Homeostasis	0.0258218	7	2.67019	[AKAP7, ANK3, ATP1B1, CACNB3, P2RX3, SLC6A4, STK39]
6	GO:0010959	regulation of metal ion transport	Metabolism, Transport & Homeostasis	0.000681089	18	2.83745	[AHNAK, AKAP7, ANK3, ATP1B1, ATP2B1, CACNB3, CAMK2B, CLIC2, HOMER1, HOMER2, KCNN2, LGALS3, P2RX3, PDE4B, SLC6A4, SLC8A1, STK39, WNK4]
6	GO:0032414	positive regulation of ion transmembrane transporter activity	Metabolism, Transport & Homeostasis	0.0452996	4	3.22391	[ANK3, CACNB3, SLC6A4, STK39]
6	GO:0051928	positive regulation of calcium ion transport	Metabolism, Transport & Homeostasis	0.0488768	5	2.65801	[ATP2B1, CACNB3, LGALS3, P2RX3, SLC6A4]
6	GO:1904064	positive regulation of cation transmembrane transport	Metabolism, Transport & Homeostasis	0.0465937	6	2.43759	[AKAP7, ANK3, ATP1B1, CACNB3, P2RX3, SLC6A4]
6	GO:0051924	regulation of calcium ion transport	Metabolism, Transport & Homeostasis	0.00250784	12	3.10698	[AHNAK, ATP2B1, CACNB3, CAMK2B, CLIC2, HOMER1, HOMER2, LGALS3, P2RX3, PDE4B, SLC6A4, SLC8A1]
6	GO:1903169	regulation of calcium ion transmembrane transport	Metabolism, Transport & Homeostasis	0.0326732	7	2.49853	[AHNAK, CACNB3, CLIC2, P2RX3, PDE4B, SLC6A4, SLC8A1]
6	GO:1901019	regulation of calcium ion transmembrane transporter activity	Metabolism, Transport & Homeostasis	0.0352528	4	3.56933	[AHNAK, CACNB3, CLIC2, SLC6A4]
6	GO:0050806	positive regulation of synaptic transmission	Metabolism, Transport & Homeostasis	0.00205492	9	4.05168	[ADRA1A, CAMK2B, CLSTN2, DLG4, GRIN2B, RAB3GAP1, SLC24A4, SLC4A8, SLC8A3]
6	GO:0048167	regulation of synaptic plasticity	Metabolism, Transport & Homeostasis	0.0355185	7	2.42913	[CAMK2B, DLG4, GRIN2B, RAB3GAP1, SLC24A4, SLC8A3, SYT7]
6	GO:0060291	long-term synaptic potentiation	Metabolism, Transport & Homeostasis	0.0452996	4	3.22391	[CAMK2B, GRIN2B, SLC24A4, SLC8A3]
6	GO:0098815	modulation of excitatory postsynaptic potential	Metabolism, Transport & Homeostasis	0.0117622	4	5.71093	[DLG4, GRIN2B, SHANK1, SLC8A3]
6	GO:0140828	metal cation:monoatomic cation antiporter activity	Metabolism, Transport & Homeostasis	0.00422118	5	6.24633	[SLC24A4, SLC24A5, SLC8A1, SLC8A3, SLC9B2]
6	GO:0048168	regulation of neuronal synaptic plasticity	Metabolism, Transport & Homeostasis	0.0247653	4	4.16422	[CAMK2B, DLG4, GRIN2B, RAB3GAP1]
6	GO:0098703	calcium ion import across plasma membrane	Metabolism, Transport & Homeostasis	0.00422118	5	6.24633	[CACNA1H, SLC24A4, SLC8A1, SLC8A3, TRPV6]
6	GO:1902656	calcium ion import into cytosol	Metabolism, Transport & Homeostasis	0.00467272	5	6.09398	[CACNA1H, SLC24A4, SLC8A1, SLC8A3, TRPV6]
6	GO:0015368	calcium:monoatomic cation antiporter activity	Metabolism, Transport & Homeostasis	0.000837126	4	15.3756	[SLC24A4, SLC24A5, SLC8A1, SLC8A3]
6	GO:0005432	calcium:sodium antiporter activity	Metabolism, Transport & Homeostasis	0.000392406	4	19.9883	[SLC24A4, SLC24A5, SLC8A1, SLC8A3]
6	GO:0034765	regulation of monoatomic ion transmembrane transport	Metabolism, Transport & Homeostasis	0.00262278	15	2.65801	[AHNAK, AKAP7, ANK3, ATP1B1, CACNB3, CLIC2, GRIN2B, HOMER1, KCNJ1, KCNN2, P2RX3, PDE4B, SLC6A4, SLC8A1, STK39]
6	GO:0071805	potassium ion transmembrane transport	Metabolism, Transport & Homeostasis	0.0024543	13	2.95281	[ADRB2, AKAP7, ANK3, ATP1B1, KCNG2, KCNJ1, KCNK2, KCNK4, KCNN2, SLC12A3, SLC24A4, SLC24A5, STK39]
6	GO:0006813	potassium ion transport	Metabolism, Transport & Homeostasis	0.0014805	14	3.01547	[ADRB2, AKAP7, ANK3, ATP1B1, CNGA2, KCNG2, KCNJ1, KCNK2, KCNK4, KCNN2, SLC12A3, SLC24A4, SLC24A5, STK39]
6	GO:0022836	gated channel activity	Metabolism, Transport & Homeostasis	0.00121228	19	2.56606	[AHNAK, ANK3, CACNA1H, CACNB3, CHRNA10, CLCN2, CLIC2, CNGA2, GABRA4, GRIN2B, KCNJ1, KCNK2, KCNK4, KCNN2, P2RX3, PIEZO2, SHANK1, SLC6A4, TRPM4]
6	GO:0046873	metal ion transmembrane transporter activity	Metabolism, Transport & Homeostasis	0.00014781	29	2.48142	[ADRB2, AHNAK, ANK3, ATP1B1, ATP2B1, CACNA1H, CACNB3, CLIC2, CNNM4, GRIN2B, KCNG2, KCNJ1, KCNK2, KCNK4, KCNN2, PDE4B, SLC12A3, SLC24A4, SLC24A5, SLC4A8, SLC5A7, SLC6A4, SLC8A1, SLC8A3, SLC9B2, STK39, TRPC7, TRPM4, TRPV6]
6	GO:0005261	monoatomic cation channel activity	Metabolism, Transport & Homeostasis	0.000531007	24	2.47278	[ADRB2, AHNAK, ANK3, CACNA1H, CACNB3, CHRNA10, CLIC2, CNGA2, GRIN2B, HOMER1, KCNG2, KCNJ1, KCNK2, KCNK4, KCNN2, P2RX3, PDE4B, PIEZO2, SLC24A4, SLC24A5, SLC6A4, TRPC7, TRPM4, TRPV6]
6	GO:0015079	potassium ion transmembrane transporter activity	Metabolism, Transport & Homeostasis	0.00344858	12	2.92511	[ADRB2, ANK3, ATP1B1, KCNG2, KCNJ1, KCNK2, KCNK4, KCNN2, SLC12A3, SLC24A4, SLC24A5, STK39]
6	GO:0005244	voltage-gated monoatomic ion channel activity	Metabolism, Transport & Homeostasis	0.013443	10	2.54952	[AHNAK, ANK3, CACNA1H, CACNB3, CLCN2, GRIN2B, KCNJ1, KCNK2, KCNK4, KCNN2]
6	GO:0022832	voltage-gated channel activity	Metabolism, Transport & Homeostasis	0.0137209	10	2.53658	[AHNAK, ANK3, CACNA1H, CACNB3, CLCN2, GRIN2B, KCNJ1, KCNK2, KCNK4, KCNN2]
6	GO:2001257	regulation of cation channel activity	Metabolism, Transport & Homeostasis	0.0136644	6	3.61234	[AHNAK, ANK3, CACNB3, CLIC2, HOMER1, SLC6A4]
6	GO:0005267	potassium channel activity	Metabolism, Transport & Homeostasis	0.0494617	7	2.19997	[ADRB2, ANK3, KCNG2, KCNJ1, KCNK2, KCNK4, KCNN2]
6	GO:0022843	voltage-gated monoatomic cation channel activity	Metabolism, Transport & Homeostasis	0.0228937	8	2.5626	[AHNAK, ANK3, CACNA1H, CACNB3, KCNJ1, KCNK2, KCNK4, KCNN2]
6	GO:0034762	regulation of transmembrane transport	Metabolism, Transport & Homeostasis	0.00520035	17	2.25931	[AHNAK, AKAP7, ANK3, ATP1B1, CACNB3, CLIC2, GRIN2B, HOMER1, KCNJ1, KCNN2, P2RX3, PDE4B, SHANK1, SLC26A6, SLC6A4, SLC8A1, STK39]
6	GO:0022803	passive transmembrane transporter activity	Metabolism, Transport & Homeostasis	0.000105652	33	2.4144	[ADRB2, AHNAK, ANK3, CACNA1H, CACNB3, CHRNA10, CLCN2, CLIC2, CNGA2, GABRA4, GJB1, GJD3, GRIN2B, HOMER1, KCNG2, KCNJ1, KCNK2, KCNK4, KCNN2, LRRC8C, OCA2, P2RX3, PDE4B, PIEZO2, RHAG, SHANK1, SLC24A4, SLC24A5, SLC6A4, TRPC7, TRPM4, TRPV6, WNK4]
6	GO:0034765	regulation of monoatomic ion transmembrane transport	Metabolism, Transport & Homeostasis	0.00262278	15	2.65801	[AHNAK, AKAP7, ANK3, ATP1B1, CACNB3, CLIC2, GRIN2B, HOMER1, KCNJ1, KCNN2, P2RX3, PDE4B, SLC6A4, SLC8A1, STK39]
6	GO:0015267	channel activity	Metabolism, Transport & Homeostasis	0.000105652	33	2.4144	[ADRB2, AHNAK, ANK3, CACNA1H, CACNB3, CHRNA10, CLCN2, CLIC2, CNGA2, GABRA4, GJB1, GJD3, GRIN2B, HOMER1, KCNG2, KCNJ1, KCNK2, KCNK4, KCNN2, LRRC8C, OCA2, P2RX3, PDE4B, PIEZO2, RHAG, SHANK1, SLC24A4, SLC24A5, SLC6A4, TRPC7, TRPM4, TRPV6, WNK4]
6	GO:1904062	regulation of monoatomic cation transmembrane transport	Metabolism, Transport & Homeostasis	0.00282708	14	2.74349	[AHNAK, AKAP7, ANK3, ATP1B1, CACNB3, CLIC2, GRIN2B, HOMER1, KCNN2, P2RX3, PDE4B, SLC6A4, SLC8A1, STK39]
6	GO:0099565	chemical synaptic transmission, postsynaptic	Metabolism, Transport & Homeostasis	0.0246907	7	2.71159	[CHRNA10, DLG4, GRIN2B, P2RX3, RAB3GAP1, SHANK1, SLC8A3]
6	GO:0005216	monoatomic ion channel activity	Metabolism, Transport & Homeostasis	0.000151137	30	2.44156	[ADRB2, AHNAK, ANK3, CACNA1H, CACNB3, CHRNA10, CLCN2, CLIC2, CNGA2, GABRA4, GRIN2B, HOMER1, KCNG2, KCNJ1, KCNK2, KCNK4, KCNN2, LRRC8C, OCA2, P2RX3, PDE4B, PIEZO2, SHANK1, SLC24A4, SLC24A5, SLC6A4, TRPC7, TRPM4, TRPV6, WNK4]
6	GO:0022836	gated channel activity	Metabolism, Transport & Homeostasis	0.00121228	19	2.56606	[AHNAK, ANK3, CACNA1H, CACNB3, CHRNA10, CLCN2, CLIC2, CNGA2, GABRA4, GRIN2B, KCNJ1, KCNK2, KCNK4, KCNN2, P2RX3, PIEZO2, SHANK1, SLC6A4, TRPM4]
6	GO:0060079	excitatory postsynaptic potential	Metabolism, Transport & Homeostasis	0.00566712	7	4.02063	[CHRNA10, DLG4, GRIN2B, P2RX3, RAB3GAP1, SHANK1, SLC8A3]
6	GO:0005261	monoatomic cation channel activity	Metabolism, Transport & Homeostasis	0.000531007	24	2.47278	[ADRB2, AHNAK, ANK3, CACNA1H, CACNB3, CHRNA10, CLIC2, CNGA2, GRIN2B, HOMER1, KCNG2, KCNJ1, KCNK2, KCNK4, KCNN2, P2RX3, PDE4B, PIEZO2, SLC24A4, SLC24A5, SLC6A4, TRPC7, TRPM4, TRPV6]
6	GO:0015276	ligand-gated monoatomic ion channel activity	Metabolism, Transport & Homeostasis	0.01499	11	2.35913	[CHRNA10, CLIC2, CNGA2, GABRA4, GRIN2B, KCNJ1, KCNN2, P2RX3, SHANK1, SLC6A4, TRPM4]
6	GO:0022834	ligand-gated channel activity	Metabolism, Transport & Homeostasis	0.00768014	12	2.5626	[CHRNA10, CLIC2, CNGA2, GABRA4, GRIN2B, KCNJ1, KCNK2, KCNN2, P2RX3, SHANK1, SLC6A4, TRPM4]
6	GO:0099094	ligand-gated monoatomic cation channel activity	Metabolism, Transport & Homeostasis	0.0119604	9	2.79339	[CHRNA10, CLIC2, CNGA2, GRIN2B, KCNJ1, KCNN2, P2RX3, SLC6A4, TRPM4]
6	GO:0006885	regulation of pH	Metabolism, Transport & Homeostasis	0.0378067	5	2.93945	[LACC1, OCA2, SLC26A6, SLC4A1, SLC4A8]
6	GO:0030641	regulation of cellular pH	Metabolism, Transport & Homeostasis	0.0340667	5	3.04699	[LACC1, OCA2, SLC26A6, SLC4A1, SLC4A8]
6	GO:0006820	monoatomic anion transport	Metabolism, Transport & Homeostasis	0.00021807	14	3.90832	[ABCB1, ABCC1, ABCC2, CLCN2, CLIC2, GABRA4, KCNK2, LRRC8C, OCA2, SLC12A3, SLC26A6, SLC4A1, SLC4A8, SLC6A4]
6	GO:0008514	organic anion transmembrane transporter activity	Metabolism, Transport & Homeostasis	0.0258582	12	2.02584	[ABCB1, ABCC1, ABCC2, ABCG2, GRIN2B, SHANK1, SLC16A5, SLC26A6, SLC2A1, SLC4A1, SLC4A8, STK39]
6	GO:0015318	inorganic molecular entity transmembrane transporter activity	Metabolism, Transport & Homeostasis	9.51141e-05	39	2.2121	[ABCC1, ABCC2, ADRB2, AHNAK, ANK3, ATP1B1, ATP2B1, CACNA1H, CACNB3, CLCN2, CLIC2, CNNM4, GABRA4, GRIN2B, KCNG2, KCNJ1, KCNK2, KCNK4, KCNN2, NDUFS8, OCA2, PDE4B, RHAG, SHANK1, SLC12A3, SLC24A4, SLC24A5, SLC26A6, SLC4A1, SLC4A8, SLC5A7, SLC6A4, SLC8A1, SLC8A3, SLC9B2, STK39, TRPC7, TRPM4, TRPV6]
6	GO:0015701	bicarbonate transport	Metabolism, Transport & Homeostasis	0.014274	4	5.26007	[RHAG, SLC26A6, SLC4A1, SLC4A8]
6	GO:0022804	active transmembrane transporter activity	Metabolism, Transport & Homeostasis	0.0033421	19	2.26597	[ABCB1, ABCC1, ABCC2, ABCG2, ATP1B1, ATP2B1, NDUFS8, SLC12A3, SLC24A4, SLC24A5, SLC26A6, SLC29A4, SLC4A1, SLC4A8, SLC5A7, SLC6A4, SLC8A1, SLC8A3, SLC9B2]
6	GO:0098656	monoatomic anion transmembrane transport	Metabolism, Transport & Homeostasis	0.000387489	13	3.93708	[ABCC1, ABCC2, CLCN2, CLIC2, GABRA4, KCNK2, LRRC8C, OCA2, SLC12A3, SLC26A6, SLC4A1, SLC4A8, SLC6A4]
6	GO:0098661	inorganic anion transmembrane transport	Metabolism, Transport & Homeostasis	0.00317135	10	3.39937	[CLCN2, CLIC2, GABRA4, KCNK2, OCA2, SLC12A3, SLC26A6, SLC4A1, SLC4A8, SLC6A4]
6	GO:0006821	chloride transport	Metabolism, Transport & Homeostasis	0.000875707	11	3.98317	[ABCB1, CLCN2, CLIC2, GABRA4, KCNK2, OCA2, SLC12A3, SLC26A6, SLC4A1, SLC4A8, SLC6A4]
6	GO:0006835	dicarboxylic acid transport	Metabolism, Transport & Homeostasis	0.0225174	5	3.56933	[ABCC2, KCNK2, LRRC8C, RAB3GAP1, SLC26A6]
6	GO:0008509	monoatomic anion transmembrane transporter activity	Metabolism, Transport & Homeostasis	0.00355479	10	3.30932	[CLCN2, CLIC2, GABRA4, LRRC8C, OCA2, SLC12A3, SLC26A6, SLC4A1, SLC4A8, SLC6A4]
6	GO:0015103	inorganic anion transmembrane transporter activity	Metabolism, Transport & Homeostasis	0.00267723	11	3.27189	[ABCC1, ABCC2, CLCN2, CLIC2, GABRA4, OCA2, SLC12A3, SLC26A6, SLC4A1, SLC4A8, SLC6A4]
6	GO:0015291	secondary active transmembrane transporter activity	Metabolism, Transport & Homeostasis	0.0208839	11	2.21644	[SLC12A3, SLC24A4, SLC24A5, SLC26A6, SLC4A1, SLC4A8, SLC5A7, SLC6A4, SLC8A1, SLC8A3, SLC9B2]
6	GO:0022853	active monoatomic ion transmembrane transporter activity	Metabolism, Transport & Homeostasis	0.00543627	14	2.48081	[ATP1B1, ATP2B1, NDUFS8, SLC12A3, SLC24A4, SLC24A5, SLC26A6, SLC4A1, SLC4A8, SLC5A7, SLC6A4, SLC8A1, SLC8A3, SLC9B2]
6	GO:1902476	chloride transmembrane transport	Metabolism, Transport & Homeostasis	0.00146396	10	3.90396	[CLCN2, CLIC2, GABRA4, KCNK2, OCA2, SLC12A3, SLC26A6, SLC4A1, SLC4A8, SLC6A4]
6	GO:0015108	chloride transmembrane transporter activity	Metabolism, Transport & Homeostasis	0.00330093	9	3.65639	[CLCN2, CLIC2, GABRA4, OCA2, SLC12A3, SLC26A6, SLC4A1, SLC4A8, SLC6A4]
6	GO:0015297	antiporter activity	Metabolism, Transport & Homeostasis	0.00215804	9	4.0155	[SLC24A4, SLC24A5, SLC26A6, SLC4A1, SLC4A8, SLC6A4, SLC8A1, SLC8A3, SLC9B2]
6	GO:1990806	ligand-gated ion channel signaling pathway	Metabolism, Transport & Homeostasis	0.0402387	4	3.38784	[ADRB2, DLG4, GRIN2B, SHANK1]
6	GO:0099536	synaptic signaling	Metabolism, Transport & Homeostasis	0.000736695	27	2.24121	[ADRA1A, CACNB3, CAMK2B, CHRNA10, CLSTN2, DLG2, DLG4, GABRA4, GPR176, GRIN2B, HOMER1, IQSEC2, KCNK2, NPTX1, OTOF, P2RX3, PLCL1, PTPRN2, RAB3GAP1, SHANK1, SLC24A4, SLC4A8, SLC5A7, SLC8A3, SNAP25, SYPL1, SYT7]
6	GO:0007215	glutamate receptor signaling pathway	Metabolism, Transport & Homeostasis	0.0122177	6	3.7478	[ADRB2, DLG4, GRIN2B, HOMER1, HOMER2, SHANK1]
6	GO:0099177	regulation of trans-synaptic signaling	Metabolism, Transport & Homeostasis	0.00183865	16	2.69202	[ADRA1A, CAMK2B, CLSTN2, DLG4, GRIN2B, HOMER1, IQSEC2, KCNK2, OTOF, PLCL1, RAB3GAP1, SHANK1, SLC24A4, SLC4A8, SLC8A3, SYT7]
6	GO:0035235	ionotropic glutamate receptor signaling pathway	Metabolism, Transport & Homeostasis	0.0326512	4	3.70153	[ADRB2, DLG4, GRIN2B, SHANK1]
6	GO:0099537	trans-synaptic signaling	Metabolism, Transport & Homeostasis	0.000534556	27	2.32622	[ADRA1A, CACNB3, CAMK2B, CHRNA10, CLSTN2, DLG2, DLG4, GABRA4, GPR176, GRIN2B, HOMER1, IQSEC2, KCNK2, NPTX1, OTOF, P2RX3, PLCL1, PTPRN2, RAB3GAP1, SHANK1, SLC24A4, SLC4A8, SLC5A7, SLC8A3, SNAP25, SYPL1, SYT7]
6	GO:0035418	protein localization to synapse	Metabolism, Transport & Homeostasis	0.00906372	5	4.89909	[DLG2, DLG4, GPC6, IQSEC2, SHANK1]
6	GO:0099565	chemical synaptic transmission, postsynaptic	Metabolism, Transport & Homeostasis	0.0246907	7	2.71159	[CHRNA10, DLG4, GRIN2B, P2RX3, RAB3GAP1, SHANK1, SLC8A3]
6	GO:0050804	modulation of chemical synaptic transmission	Metabolism, Transport & Homeostasis	0.00173737	16	2.71027	[ADRA1A, CAMK2B, CLSTN2, DLG4, GRIN2B, HOMER1, IQSEC2, KCNK2, OTOF, PLCL1, RAB3GAP1, SHANK1, SLC24A4, SLC4A8, SLC8A3, SYT7]
6	GO:0050806	positive regulation of synaptic transmission	Metabolism, Transport & Homeostasis	0.00205492	9	4.05168	[ADRA1A, CAMK2B, CLSTN2, DLG4, GRIN2B, RAB3GAP1, SLC24A4, SLC4A8, SLC8A3]
6	GO:0048167	regulation of synaptic plasticity	Metabolism, Transport & Homeostasis	0.0355185	7	2.42913	[CAMK2B, DLG4, GRIN2B, RAB3GAP1, SLC24A4, SLC8A3, SYT7]
6	GO:0060079	excitatory postsynaptic potential	Metabolism, Transport & Homeostasis	0.00566712	7	4.02063	[CHRNA10, DLG4, GRIN2B, P2RX3, RAB3GAP1, SHANK1, SLC8A3]
6	GO:0007268	chemical synaptic transmission	Metabolism, Transport & Homeostasis	0.00046591	27	2.35054	[ADRA1A, CACNB3, CAMK2B, CHRNA10, CLSTN2, DLG2, DLG4, GABRA4, GPR176, GRIN2B, HOMER1, IQSEC2, KCNK2, NPTX1, OTOF, P2RX3, PLCL1, PTPRN2, RAB3GAP1, SHANK1, SLC24A4, SLC4A8, SLC5A7, SLC8A3, SNAP25, SYPL1, SYT7]
6	GO:0060291	long-term synaptic potentiation	Metabolism, Transport & Homeostasis	0.0452996	4	3.22391	[CAMK2B, GRIN2B, SLC24A4, SLC8A3]
6	GO:0098815	modulation of excitatory postsynaptic potential	Metabolism, Transport & Homeostasis	0.0117622	4	5.71093	[DLG4, GRIN2B, SHANK1, SLC8A3]
6	GO:0048168	regulation of neuronal synaptic plasticity	Metabolism, Transport & Homeostasis	0.0247653	4	4.16422	[CAMK2B, DLG4, GRIN2B, RAB3GAP1]
6	GO:0015276	ligand-gated monoatomic ion channel activity	Metabolism, Transport & Homeostasis	0.01499	11	2.35913	[CHRNA10, CLIC2, CNGA2, GABRA4, GRIN2B, KCNJ1, KCNN2, P2RX3, SHANK1, SLC6A4, TRPM4]
6	GO:0006805	xenobiotic metabolic process	Metabolism, Transport & Homeostasis	0.0312241	7	2.53474	[ABCB1, ABCC1, ABCC2, CYP1A1, CYP1B1, CYP2J2, UGT1A1]
6	GO:0097035	regulation of membrane lipid distribution	Metabolism, Transport & Homeostasis	0.0419003	4	3.33138	[ABCB1, ABCC1, ATP11A, ATP8B3]
6	GO:0140115	export across plasma membrane	Metabolism, Transport & Homeostasis	0.00265297	7	4.85826	[ABCB1, ABCC1, ABCG2, ATP1B1, ATP2B1, SLC24A4, SLC29A4]
6	GO:1903825	organic acid transmembrane transport	Metabolism, Transport & Homeostasis	0.00496067	13	2.63004	[ABCB1, ABCC1, ABCC2, ABCG2, CPT1A, GRIN2B, LRRC8C, SHANK1, SLC16A5, SLC26A6, SLC29A4, SLC2A1, STK39]
6	GO:0010232	vascular transport	Metabolism, Transport & Homeostasis	0.00237871	8	4.39303	[ABCB1, ABCC1, ABCC2, ABCG2, SLC29A4, SLC2A1, SLC4A8, TFRC]
6	GO:0005319	lipid transporter activity	Metabolism, Transport & Homeostasis	0.00892642	10	2.79166	[ABCB1, ABCC1, ABCG2, APOD, ATP11A, ATP8B3, GLTPD2, OSBPL10, OSBPL6, SLC2A1]
6	GO:0005342	organic acid transmembrane transporter activity	Metabolism, Transport & Homeostasis	0.0101461	11	2.55664	[ABCB1, ABCC1, ABCC2, ABCG2, GRIN2B, SHANK1, SLC16A5, SLC26A6, SLC29A4, SLC2A1, STK39]
6	GO:0006820	monoatomic anion transport	Metabolism, Transport & Homeostasis	0.00021807	14	3.90832	[ABCB1, ABCC1, ABCC2, CLCN2, CLIC2, GABRA4, KCNK2, LRRC8C, OCA2, SLC12A3, SLC26A6, SLC4A1, SLC4A8, SLC6A4]
6	GO:0008514	organic anion transmembrane transporter activity	Metabolism, Transport & Homeostasis	0.0258582	12	2.02584	[ABCB1, ABCC1, ABCC2, ABCG2, GRIN2B, SHANK1, SLC16A5, SLC26A6, SLC2A1, SLC4A1, SLC4A8, STK39]
6	GO:0015562	efflux transmembrane transporter activity	Metabolism, Transport & Homeostasis	0.000148801	5	16.6569	[ABCB1, ABCC1, ABCG2, SLC26A6, SLC29A4]
6	GO:0015914	phospholipid transport	Metabolism, Transport & Homeostasis	0.0259967	6	2.93945	[ABCB1, ABCC1, ATP11A, ATP8B3, GLTPD2, OSBPL10]
6	GO:0022804	active transmembrane transporter activity	Metabolism, Transport & Homeostasis	0.0033421	19	2.26597	[ABCB1, ABCC1, ABCC2, ABCG2, ATP1B1, ATP2B1, NDUFS8, SLC12A3, SLC24A4, SLC24A5, SLC26A6, SLC29A4, SLC4A1, SLC4A8, SLC5A7, SLC6A4, SLC8A1, SLC8A3, SLC9B2]
6	GO:0034204	lipid translocation	Metabolism, Transport & Homeostasis	0.0340228	4	3.63423	[ABCB1, ABCC1, ATP11A, ATP8B3]
6	GO:0042910	xenobiotic transmembrane transporter activity	Metabolism, Transport & Homeostasis	0.00149564	5	8.61563	[ABCB1, ABCC1, ABCC2, ABCG2, SLC29A4]
6	GO:0046942	carboxylic acid transport	Metabolism, Transport & Homeostasis	0.00465981	16	2.37249	[ABCB1, ABCC1, ABCC2, ABCG2, CPT1A, GRIN2B, KCNK2, LRRC8C, PSAP, RAB3GAP1, SHANK1, SLC16A5, SLC26A6, SLC2A1, SLC51A, STK39]
6	GO:1901682	sulfur compound transmembrane transporter activity	Metabolism, Transport & Homeostasis	0.0402387	4	3.38784	[ABCC1, ABCC2, ABCG2, SLC26A6]
6	GO:1905039	carboxylic acid transmembrane transport	Metabolism, Transport & Homeostasis	0.0101618	12	2.43759	[ABCB1, ABCC1, ABCC2, ABCG2, CPT1A, GRIN2B, LRRC8C, SHANK1, SLC16A5, SLC26A6, SLC2A1, STK39]
6	GO:0150104	transport across blood-brain barrier	Metabolism, Transport & Homeostasis	0.00237871	8	4.39303	[ABCB1, ABCC1, ABCC2, ABCG2, SLC29A4, SLC2A1, SLC4A8, TFRC]
6	GO:0006835	dicarboxylic acid transport	Metabolism, Transport & Homeostasis	0.0225174	5	3.56933	[ABCC2, KCNK2, LRRC8C, RAB3GAP1, SLC26A6]
6	GO:0015103	inorganic anion transmembrane transporter activity	Metabolism, Transport & Homeostasis	0.00267723	11	3.27189	[ABCC1, ABCC2, CLCN2, CLIC2, GABRA4, OCA2, SLC12A3, SLC26A6, SLC4A1, SLC4A8, SLC6A4]
6	GO:0015718	monocarboxylic acid transport	Metabolism, Transport & Homeostasis	0.023749	8	2.53016	[ABCC2, ABCG2, CPT1A, SLC16A5, SLC26A6, SLC2A1, SLC51A, STK39]
6	GO:0045332	phospholipid translocation	Metabolism, Transport & Homeostasis	0.0272468	4	3.99765	[ABCB1, ABCC1, ATP11A, ATP8B3]
6	GO:0046624	sphingolipid transporter activity	Metabolism, Transport & Homeostasis	0.00304355	4	9.51822	[ABCB1, ABCC1, ABCG2, GLTPD2]
6	GO:0046943	carboxylic acid transmembrane transporter activity	Metabolism, Transport & Homeostasis	0.0204889	10	2.33508	[ABCB1, ABCC1, ABCC2, ABCG2, GRIN2B, SHANK1, SLC16A5, SLC26A6, SLC2A1, STK39]
6	GO:1990962	xenobiotic transport across blood-brain barrier	Metabolism, Transport & Homeostasis	9.81494e-05	4	33.3138	[ABCB1, ABCC1, ABCC2, ABCG2]
6	GO:0042626	ATPase-coupled transmembrane transporter activity	Metabolism, Transport & Homeostasis	0.0246813	6	2.99824	[ABCB1, ABCC1, ABCC2, ABCG2, ATP1B1, ATP2B1]
6	GO:0008559	ABC-type xenobiotic transporter activity	Metabolism, Transport & Homeostasis	0.000517003	4	18.1712	[ABCB1, ABCC1, ABCC2, ABCG2]
6	GO:0140359	ABC-type transporter activity	Metabolism, Transport & Homeostasis	0.0053644	4	7.6878	[ABCB1, ABCC1, ABCC2, ABCG2]
6	GO:0099003	vesicle-mediated transport in synapse	Metabolism, Transport & Homeostasis	0.0304376	7	2.55325	[BRSK2, MX2, OTOF, RAB3GAP1, SLC4A8, SNAP25, SYT7]
6	GO:0001678	intracellular glucose homeostasis	Metabolism, Transport & Homeostasis	0.0111445	7	3.39607	[BRSK2, FOXO1, MAP4K2, NR1D1, PPARGC1A, PTPRN2, TRPM4]
6	GO:0034284	response to monosaccharide	Metabolism, Transport & Homeostasis	0.0126024	7	3.26911	[BRSK2, LPL, MAP4K2, NR1D1, PTPRN2, SLC26A6, TRPM4]
6	GO:0035592	establishment of protein localization to extracellular region	Metabolism, Transport & Homeostasis	0.0143759	12	2.28003	[APBB1, BRSK2, CD200, FOXO1, LRRC32, MAP4K2, NR1D1, PTPRN2, RAPGEF4, SNAP25, SYT7, TRPM4]
6	GO:0042886	amide transport	Metabolism, Transport & Homeostasis	0.000165382	17	3.45326	[ABCB1, ABCC1, ABCG2, BRSK2, FOXO1, GLTPD2, MAP4K2, NR1D1, PSAP, PTPRN2, RAPGEF4, SLC14A2, SLC26A6, SNAP25, STK39, SYT7, TRPM4]
6	GO:0071322	cellular response to carbohydrate stimulus	Metabolism, Transport & Homeostasis	0.0329657	5	3.08461	[BRSK2, NR1D1, PTPRN2, SLC26A6, TRPM4]
6	GO:0071692	protein localization to extracellular region	Metabolism, Transport & Homeostasis	0.00885296	13	2.39712	[APBB1, BRSK2, CD200, FOXO1, LRRC32, MAP4K2, MICOS10-NBL1, NR1D1, PTPRN2, RAPGEF4, SNAP25, SYT7, TRPM4]
6	GO:0099504	synaptic vesicle cycle	Metabolism, Transport & Homeostasis	0.0258218	7	2.67019	[BRSK2, MX2, OTOF, RAB3GAP1, SLC4A8, SNAP25, SYT7]
6	GO:0090087	regulation of peptide transport	Metabolism, Transport & Homeostasis	0.00329179	10	3.35374	[BRSK2, FOXO1, MAP4K2, NR1D1, RAPGEF4, SLC26A6, SNAP25, STK39, SYT7, TRPM4]
6	GO:0009306	protein secretion	Metabolism, Transport & Homeostasis	0.0254391	11	2.11414	[APBB1, BRSK2, CD200, FOXO1, MAP4K2, NR1D1, PTPRN2, RAPGEF4, SNAP25, SYT7, TRPM4]
6	GO:0045055	regulated exocytosis	Metabolism, Transport & Homeostasis	0.0345932	8	2.28437	[OTOF, RAB3GAP1, S100A13, SLC4A8, SNAP25, SYT7, TPH1, TRPV6]
6	GO:0045913	positive regulation of carbohydrate metabolic process	Metabolism, Transport & Homeostasis	0.0435875	4	3.27677	[FOXO1, LHCGR, MAP4K2, PPARGC1A]
6	GO:0046883	regulation of hormone secretion	Metabolism, Transport & Homeostasis	0.0235304	9	2.37956	[BRSK2, FOXO1, MAP4K2, NR1D1, RAPGEF4, SNAP25, STK39, SYT7, TRPM4]
6	GO:0002790	peptide secretion	Metabolism, Transport & Homeostasis	0.00705252	10	2.92226	[BRSK2, FOXO1, MAP4K2, NR1D1, PTPRN2, RAPGEF4, SNAP25, STK39, SYT7, TRPM4]
6	GO:0009746	response to hexose	Metabolism, Transport & Homeostasis	0.0126024	7	3.26911	[BRSK2, LPL, MAP4K2, NR1D1, PTPRN2, SLC26A6, TRPM4]
6	GO:0015833	peptide transport	Metabolism, Transport & Homeostasis	0.00266559	12	3.05943	[ABCC1, BRSK2, FOXO1, MAP4K2, NR1D1, PTPRN2, RAPGEF4, SLC26A6, SNAP25, STK39, SYT7, TRPM4]
6	GO:0043255	regulation of carbohydrate biosynthetic process	Metabolism, Transport & Homeostasis	0.0312719	5	3.1627	[FOXO1, LHCGR, MAP4K2, PPARGC1A, STK39]
6	GO:0046879	hormone secretion	Metabolism, Transport & Homeostasis	0.00951764	11	2.59282	[BRSK2, FOXO1, MAP4K2, NR1D1, PTPRN2, RAPGEF4, SNAP25, STK39, SYT7, TBX3, TRPM4]
6	GO:0050708	regulation of protein secretion	Metabolism, Transport & Homeostasis	0.0122856	10	2.60264	[APBB1, BRSK2, CD200, FOXO1, MAP4K2, NR1D1, RAPGEF4, SNAP25, SYT7, TRPM4]
6	GO:0071326	cellular response to monosaccharide stimulus	Metabolism, Transport & Homeostasis	0.0278591	5	3.28754	[BRSK2, NR1D1, PTPRN2, SLC26A6, TRPM4]
6	GO:0099643	signal release from synapse	Metabolism, Transport & Homeostasis	0.0355615	6	2.65331	[OTOF, PTPRN2, RAB3GAP1, SLC4A8, SNAP25, SYT7]
6	GO:0002791	regulation of peptide secretion	Metabolism, Transport & Homeostasis	0.00783454	9	3.05943	[BRSK2, FOXO1, MAP4K2, NR1D1, RAPGEF4, SNAP25, STK39, SYT7, TRPM4]
6	GO:0007269	neurotransmitter secretion	Metabolism, Transport & Homeostasis	0.0355615	6	2.65331	[OTOF, PTPRN2, RAB3GAP1, SLC4A8, SNAP25, SYT7]
6	GO:0090276	regulation of peptide hormone secretion	Metabolism, Transport & Homeostasis	0.00769491	9	3.08038	[BRSK2, FOXO1, MAP4K2, NR1D1, RAPGEF4, SNAP25, STK39, SYT7, TRPM4]
6	GO:0009749	response to glucose	Metabolism, Transport & Homeostasis	0.0289763	6	2.85547	[BRSK2, LPL, MAP4K2, NR1D1, PTPRN2, TRPM4]
6	GO:0016079	synaptic vesicle exocytosis	Metabolism, Transport & Homeostasis	0.024101	5	3.47019	[OTOF, RAB3GAP1, SLC4A8, SNAP25, SYT7]
6	GO:0030072	peptide hormone secretion	Metabolism, Transport & Homeostasis	0.00682447	10	2.93945	[BRSK2, FOXO1, MAP4K2, NR1D1, PTPRN2, RAPGEF4, SNAP25, STK39, SYT7, TRPM4]
6	GO:0030073	insulin secretion	Metabolism, Transport & Homeostasis	0.0048031	9	3.40709	[BRSK2, FOXO1, MAP4K2, NR1D1, PTPRN2, RAPGEF4, SNAP25, SYT7, TRPM4]
6	GO:0071331	cellular response to hexose stimulus	Metabolism, Transport & Homeostasis	0.0278591	5	3.28754	[BRSK2, NR1D1, PTPRN2, SLC26A6, TRPM4]
6	GO:0035773	insulin secretion involved in cellular response to glucose stimulus	Metabolism, Transport & Homeostasis	0.0134423	4	5.40224	[BRSK2, NR1D1, PTPRN2, TRPM4]
6	GO:0050796	regulation of insulin secretion	Metabolism, Transport & Homeostasis	0.00641592	8	3.50671	[BRSK2, FOXO1, MAP4K2, NR1D1, RAPGEF4, SNAP25, SYT7, TRPM4]
6	GO:0006885	regulation of pH	Metabolism, Transport & Homeostasis	0.0378067	5	2.93945	[LACC1, OCA2, SLC26A6, SLC4A1, SLC4A8]
6	GO:0022857	transmembrane transporter activity	Metabolism, Transport & Homeostasis	9.11045e-06	56	2.16424	[ABCB1, ABCC1, ABCC2, ABCG2, ADRB2, AHNAK, ANK3, ATP1B1, ATP2B1, CACNA1H, CACNB3, CHRNA10, CLCN2, CLIC2, CNGA2, CNNM4, GABRA4, GJB1, GJD3, GRIN2B, HOMER1, KCNG2, KCNJ1, KCNK2, KCNK4, KCNN2, LRRC8C, NDUFS8, OCA2, P2RX3, PDE4B, PIEZO2, RHAG, SHANK1, SLC12A3, SLC14A2, SLC16A5, SLC24A4, SLC24A5, SLC26A6, SLC29A4, SLC2A1, SLC44A2, SLC4A1, SLC4A8, SLC51A, SLC5A7, SLC6A4, SLC8A1, SLC8A3, SLC9B2, STK39, …
6	GO:0034220	monoatomic ion transmembrane transport	Metabolism, Transport & Homeostasis	6.53932e-06	49	2.29266	[ABCC1, ABCC2, ADRB2, AHNAK, AKAP7, ANK3, ATP1B1, ATP2B1, CACNA1H, CACNB3, CHRNA10, CLCN2, CLIC2, CNGA2, CNNM4, GABRA4, GP1BA, GRIN2B, HOMER1, KCNG2, KCNJ1, KCNK2, KCNK4, KCNN2, LRRC8C, NDUFS8, OCA2, P2RX3, PDE4B, PIEZO2, PLCL1, SHANK1, SLC12A3, SLC24A4, SLC24A5, SLC26A6, SLC29A4, SLC4A1, SLC4A8, SLC5A7, SLC6A4, SLC8A1, SLC8A3, SLC9B2, STK39, TRPC7, TRPM4, TRPV6, WNK4]
6	GO:0034762	regulation of transmembrane transport	Metabolism, Transport & Homeostasis	0.00520035	17	2.25931	[AHNAK, AKAP7, ANK3, ATP1B1, CACNB3, CLIC2, GRIN2B, HOMER1, KCNJ1, KCNN2, P2RX3, PDE4B, SHANK1, SLC26A6, SLC6A4, SLC8A1, STK39]
6	GO:0098660	inorganic ion transmembrane transport	Metabolism, Transport & Homeostasis	0.000156971	40	2.07347	[ADRB2, AHNAK, AKAP7, ANK3, ATP1B1, ATP2B1, CACNA1H, CACNB3, CLCN2, CLIC2, CNNM4, GABRA4, GP1BA, GRIN2B, KCNG2, KCNJ1, KCNK2, KCNK4, KCNN2, NDUFS8, OCA2, P2RX3, PDE4B, PLCL1, RHAG, SLC12A3, SLC24A4, SLC24A5, SLC26A6, SLC4A1, SLC4A8, SLC5A7, SLC6A4, SLC8A1, SLC8A3, SLC9B2, STK39, TRPC7, TRPM4, TRPV6]
6	GO:0098739	import across plasma membrane	Metabolism, Transport & Homeostasis	0.00502607	11	2.92382	[ATP1B1, CACNA1H, KCNJ1, LRRC8C, SLC12A3, SLC24A4, SLC2A1, SLC8A1, SLC8A3, TRPM4, TRPV6]
6	GO:0140115	export across plasma membrane	Metabolism, Transport & Homeostasis	0.00265297	7	4.85826	[ABCB1, ABCC1, ABCG2, ATP1B1, ATP2B1, SLC24A4, SLC29A4]
6	GO:0010232	vascular transport	Metabolism, Transport & Homeostasis	0.00237871	8	4.39303	[ABCB1, ABCC1, ABCC2, ABCG2, SLC29A4, SLC2A1, SLC4A8, TFRC]
6	GO:0010649	regulation of cell communication by electrical coupling	Metabolism, Transport & Homeostasis	0.00120421	4	13.3255	[ANK3, GJD3, IRX3, SLC8A1]
6	GO:0030641	regulation of cellular pH	Metabolism, Transport & Homeostasis	0.0340667	5	3.04699	[LACC1, OCA2, SLC26A6, SLC4A1, SLC4A8]
6	GO:0034764	positive regulation of transmembrane transport	Metabolism, Transport & Homeostasis	0.0353071	8	2.27139	[AKAP7, ANK3, ATP1B1, CACNB3, P2RX3, SLC26A6, SLC6A4, STK39]
6	GO:0043269	regulation of monoatomic ion transport	Metabolism, Transport & Homeostasis	0.000133641	22	2.98738	[ABCB1, AHNAK, AKAP7, ANK3, ATP1B1, ATP2B1, CACNB3, CAMK2B, CLDN10, CLIC2, GRIN2B, HOMER1, HOMER2, KCNJ1, KCNN2, LGALS3, P2RX3, PDE4B, SLC6A4, SLC8A1, STK39, WNK4]
6	GO:0043270	positive regulation of monoatomic ion transport	Metabolism, Transport & Homeostasis	0.0146158	9	2.66116	[AKAP7, ANK3, ATP1B1, ATP2B1, CACNB3, LGALS3, P2RX3, SLC6A4, STK39]
6	GO:0055074	calcium ion homeostasis	Metabolism, Transport & Homeostasis	0.00754686	13	2.46068	[ATP1B1, ATP2B1, CLIC2, DMTN, GP1BA, PLCL1, SLC24A4, SLC24A5, SLC6A4, SLC8A1, SLC8A3, TRPC7, TRPV6]
6	GO:0055078	sodium ion homeostasis	Metabolism, Transport & Homeostasis	0.0117622	4	5.71093	[ATP1B1, SLC12A3, SLC8A1, SLC9B2]
6	GO:0090257	regulation of muscle system process	Metabolism, Transport & Homeostasis	0.00245172	11	3.33138	[ADRA1A, ATP1B1, ATP2B1, CAMK2B, CLIC2, FOXO1, HAND2, PDE4B, SLC8A1, SLC8A3, TRPM4]
6	GO:1903522	regulation of blood circulation	Metabolism, Transport & Homeostasis	0.000167338	15	3.78566	[ADM2, ADRA1A, ATP1B1, ATP2B1, CACNA1H, CLIC2, CYP2J2, GJD3, IRX3, KCNN2, PDE4B, SLC8A1, SLC8A3, SVEP1, TRPM4]
6	GO:0006812	monoatomic cation transport	Metabolism, Transport & Homeostasis	8.43614e-05	44	2.13053	[ADRB2, AHNAK, AKAP7, ANK3, ATP1B1, ATP2B1, CACNA1H, CACNB3, CAMK2B, CHRNA10, CLIC2, CNGA2, CNNM4, GP1BA, GRIN2B, HOMER1, HOMER2, KCNG2, KCNJ1, KCNK2, KCNK4, KCNN2, LGALS3, NDUFS8, P2RX3, PDE4B, PIEZO2, PLCL1, SLC12A3, SLC24A4, SLC24A5, SLC29A4, SLC4A8, SLC5A7, SLC6A4, SLC8A1, SLC8A3, SLC9B2, STK39, TFRC, TRPC7, TRPM4, TRPV6, WNK4]
6	GO:0006820	monoatomic anion transport	Metabolism, Transport & Homeostasis	0.00021807	14	3.90832	[ABCB1, ABCC1, ABCC2, CLCN2, CLIC2, GABRA4, KCNK2, LRRC8C, OCA2, SLC12A3, SLC26A6, SLC4A1, SLC4A8, SLC6A4]
6	GO:0006939	smooth muscle contraction	Metabolism, Transport & Homeostasis	0.0125657	5	4.38339	[ADRA1A, APBB1, ATP2B1, MYH11, SLC8A1]
6	GO:0006941	striated muscle contraction	Metabolism, Transport & Homeostasis	0.0118528	9	2.81085	[ADRA1A, ATP1B1, CLIC2, GJD3, KCNN2, PDE4B, SLC8A1, SLC8A3, TRPM4]
6	GO:0008514	organic anion transmembrane transporter activity	Metabolism, Transport & Homeostasis	0.0258582	12	2.02584	[ABCB1, ABCC1, ABCC2, ABCG2, GRIN2B, SHANK1, SLC16A5, SLC26A6, SLC2A1, SLC4A1, SLC4A8, STK39]
6	GO:0015075	monoatomic ion transmembrane transporter activity	Metabolism, Transport & Homeostasis	9.47062e-06	44	2.36675	[ADRB2, AHNAK, ANK3, ATP1B1, ATP2B1, CACNA1H, CACNB3, CHRNA10, CLCN2, CLIC2, CNGA2, CNNM4, GABRA4, GRIN2B, HOMER1, KCNG2, KCNJ1, KCNK2, KCNK4, KCNN2, LRRC8C, NDUFS8, OCA2, P2RX3, PDE4B, PIEZO2, SHANK1, SLC12A3, SLC24A4, SLC24A5, SLC26A6, SLC29A4, SLC4A1, SLC4A8, SLC5A7, SLC6A4, SLC8A1, SLC8A3, SLC9B2, STK39, TRPC7, TRPM4, TRPV6, WNK4]
6	GO:0015318	inorganic molecular entity transmembrane transporter activity	Metabolism, Transport & Homeostasis	9.51141e-05	39	2.2121	[ABCC1, ABCC2, ADRB2, AHNAK, ANK3, ATP1B1, ATP2B1, CACNA1H, CACNB3, CLCN2, CLIC2, CNNM4, GABRA4, GRIN2B, KCNG2, KCNJ1, KCNK2, KCNK4, KCNN2, NDUFS8, OCA2, PDE4B, RHAG, SHANK1, SLC12A3, SLC24A4, SLC24A5, SLC26A6, SLC4A1, SLC4A8, SLC5A7, SLC6A4, SLC8A1, SLC8A3, SLC9B2, STK39, TRPC7, TRPM4, TRPV6]
6	GO:0015701	bicarbonate transport	Metabolism, Transport & Homeostasis	0.014274	4	5.26007	[RHAG, SLC26A6, SLC4A1, SLC4A8]
6	GO:0022803	passive transmembrane transporter activity	Metabolism, Transport & Homeostasis	0.000105652	33	2.4144	[ADRB2, AHNAK, ANK3, CACNA1H, CACNB3, CHRNA10, CLCN2, CLIC2, CNGA2, GABRA4, GJB1, GJD3, GRIN2B, HOMER1, KCNG2, KCNJ1, KCNK2, KCNK4, KCNN2, LRRC8C, OCA2, P2RX3, PDE4B, PIEZO2, RHAG, SHANK1, SLC24A4, SLC24A5, SLC6A4, TRPC7, TRPM4, TRPV6, WNK4]
6	GO:0022804	active transmembrane transporter activity	Metabolism, Transport & Homeostasis	0.0033421	19	2.26597	[ABCB1, ABCC1, ABCC2, ABCG2, ATP1B1, ATP2B1, NDUFS8, SLC12A3, SLC24A4, SLC24A5, SLC26A6, SLC29A4, SLC4A1, SLC4A8, SLC5A7, SLC6A4, SLC8A1, SLC8A3, SLC9B2]
6	GO:0022898	regulation of transmembrane transporter activity	Metabolism, Transport & Homeostasis	0.0243188	8	2.51425	[AHNAK, ANK3, CACNB3, CLIC2, HOMER1, SHANK1, SLC6A4, STK39]
6	GO:0030003	intracellular monoatomic cation homeostasis	Metabolism, Transport & Homeostasis	0.00332592	20	2.20621	[ATP1B1, ATP2B1, CLIC2, CNNM4, DMTN, FRRS1, GP1BA, LACC1, OCA2, PLCL1, SLC24A4, SLC24A5, SLC26A6, SLC4A1, SLC4A8, SLC6A4, SLC8A1, SLC8A3, TFRC, TRPC7]
6	GO:0034765	regulation of monoatomic ion transmembrane transport	Metabolism, Transport & Homeostasis	0.00262278	15	2.65801	[AHNAK, AKAP7, ANK3, ATP1B1, CACNB3, CLIC2, GRIN2B, HOMER1, KCNJ1, KCNN2, P2RX3, PDE4B, SLC6A4, SLC8A1, STK39]
6	GO:0060047	heart contraction	Metabolism, Transport & Homeostasis	0.000592114	14	3.48054	[ADM2, ADRA1A, ATP1B1, ATP2B1, CACNA1H, CLIC2, CYP2J2, GJD3, IRX3, KCNN2, PDE4B, SLC8A1, SLC8A3, TRPM4]
6	GO:0086001	cardiac muscle cell action potential	Metabolism, Transport & Homeostasis	0.0165292	6	3.40709	[ANK3, ATP1B1, GJD3, KCNN2, SLC8A1, TRPM4]
6	GO:0098655	monoatomic cation transmembrane transport	Metabolism, Transport & Homeostasis	0.000150577	39	2.12294	[ADRB2, AHNAK, AKAP7, ANK3, ATP1B1, ATP2B1, CACNA1H, CACNB3, CHRNA10, CLIC2, CNGA2, CNNM4, GP1BA, GRIN2B, HOMER1, KCNG2, KCNJ1, KCNK2, KCNK4, KCNN2, NDUFS8, P2RX3, PDE4B, PIEZO2, PLCL1, SLC12A3, SLC24A4, SLC24A5, SLC29A4, SLC4A8, SLC5A7, SLC6A4, SLC8A1, SLC8A3, SLC9B2, STK39, TRPC7, TRPM4, TRPV6]
6	GO:0098656	monoatomic anion transmembrane transport	Metabolism, Transport & Homeostasis	0.000387489	13	3.93708	[ABCC1, ABCC2, CLCN2, CLIC2, GABRA4, KCNK2, LRRC8C, OCA2, SLC12A3, SLC26A6, SLC4A1, SLC4A8, SLC6A4]
6	GO:0098661	inorganic anion transmembrane transport	Metabolism, Transport & Homeostasis	0.00317135	10	3.39937	[CLCN2, CLIC2, GABRA4, KCNK2, OCA2, SLC12A3, SLC26A6, SLC4A1, SLC4A8, SLC6A4]
6	GO:0098662	inorganic cation transmembrane transport	Metabolism, Transport & Homeostasis	0.000678113	35	2.0057	[ADRB2, AHNAK, AKAP7, ANK3, ATP1B1, ATP2B1, CACNA1H, CACNB3, CLIC2, CNNM4, GP1BA, GRIN2B, KCNG2, KCNJ1, KCNK2, KCNK4, KCNN2, NDUFS8, P2RX3, PDE4B, PLCL1, RHAG, SLC12A3, SLC24A4, SLC24A5, SLC4A8, SLC5A7, SLC6A4, SLC8A1, SLC8A3, SLC9B2, STK39, TRPC7, TRPM4, TRPV6]
6	GO:0099587	inorganic ion import across plasma membrane	Metabolism, Transport & Homeostasis	0.00269466	9	3.8439	[ATP1B1, CACNA1H, KCNJ1, SLC12A3, SLC24A4, SLC8A1, SLC8A3, TRPM4, TRPV6]
6	GO:0006821	chloride transport	Metabolism, Transport & Homeostasis	0.000875707	11	3.98317	[ABCB1, CLCN2, CLIC2, GABRA4, KCNK2, OCA2, SLC12A3, SLC26A6, SLC4A1, SLC4A8, SLC6A4]
6	GO:0006874	intracellular calcium ion homeostasis	Metabolism, Transport & Homeostasis	0.0105735	12	2.41794	[ATP1B1, ATP2B1, CLIC2, DMTN, GP1BA, PLCL1, SLC24A4, SLC24A5, SLC6A4, SLC8A1, SLC8A3, TRPC7]
6	GO:0006937	regulation of muscle contraction	Metabolism, Transport & Homeostasis	0.00912213	8	3.22391	[ADRA1A, ATP1B1, ATP2B1, CLIC2, PDE4B, SLC8A1, SLC8A3, TRPM4]
6	GO:0008016	regulation of heart contraction	Metabolism, Transport & Homeostasis	0.000170981	14	4.06738	[ADM2, ADRA1A, ATP1B1, ATP2B1, CACNA1H, CLIC2, CYP2J2, GJD3, IRX3, KCNN2, PDE4B, SLC8A1, SLC8A3, TRPM4]
6	GO:0034767	positive regulation of monoatomic ion transmembrane transport	Metabolism, Transport & Homeostasis	0.0258218	7	2.67019	[AKAP7, ANK3, ATP1B1, CACNB3, P2RX3, SLC6A4, STK39]
6	GO:0097746	blood vessel diameter maintenance	Metabolism, Transport & Homeostasis	0.00498954	7	4.16422	[ADRA1A, ADRB2, ATP2B1, KEL, SLC8A1, SVEP1, TRPM4]
6	GO:0150104	transport across blood-brain barrier	Metabolism, Transport & Homeostasis	0.00237871	8	4.39303	[ABCB1, ABCC1, ABCC2, ABCG2, SLC29A4, SLC2A1, SLC4A8, TFRC]
6	GO:0008324	monoatomic cation transmembrane transporter activity	Metabolism, Transport & Homeostasis	0.000114431	36	2.27427	[ADRB2, AHNAK, ANK3, ATP1B1, ATP2B1, CACNA1H, CACNB3, CHRNA10, CLIC2, CNGA2, CNNM4, GRIN2B, HOMER1, KCNG2, KCNJ1, KCNK2, KCNK4, KCNN2, NDUFS8, P2RX3, PDE4B, PIEZO2, SLC12A3, SLC24A4, SLC24A5, SLC29A4, SLC4A8, SLC5A7, SLC6A4, SLC8A1, SLC8A3, SLC9B2, STK39, TRPC7, TRPM4, TRPV6]
6	GO:0008509	monoatomic anion transmembrane transporter activity	Metabolism, Transport & Homeostasis	0.00355479	10	3.30932	[CLCN2, CLIC2, GABRA4, LRRC8C, OCA2, SLC12A3, SLC26A6, SLC4A1, SLC4A8, SLC6A4]
6	GO:0010959	regulation of metal ion transport	Metabolism, Transport & Homeostasis	0.000681089	18	2.83745	[AHNAK, AKAP7, ANK3, ATP1B1, ATP2B1, CACNB3, CAMK2B, CLIC2, HOMER1, HOMER2, KCNN2, LGALS3, P2RX3, PDE4B, SLC6A4, SLC8A1, STK39, WNK4]
6	GO:0015103	inorganic anion transmembrane transporter activity	Metabolism, Transport & Homeostasis	0.00267723	11	3.27189	[ABCC1, ABCC2, CLCN2, CLIC2, GABRA4, OCA2, SLC12A3, SLC26A6, SLC4A1, SLC4A8, SLC6A4]
6	GO:0015267	channel activity	Metabolism, Transport & Homeostasis	0.000105652	33	2.4144	[ADRB2, AHNAK, ANK3, CACNA1H, CACNB3, CHRNA10, CLCN2, CLIC2, CNGA2, GABRA4, GJB1, GJD3, GRIN2B, HOMER1, KCNG2, KCNJ1, KCNK2, KCNK4, KCNN2, LRRC8C, OCA2, P2RX3, PDE4B, PIEZO2, RHAG, SHANK1, SLC24A4, SLC24A5, SLC6A4, TRPC7, TRPM4, TRPV6, WNK4]
6	GO:0015291	secondary active transmembrane transporter activity	Metabolism, Transport & Homeostasis	0.0208839	11	2.21644	[SLC12A3, SLC24A4, SLC24A5, SLC26A6, SLC4A1, SLC4A8, SLC5A7, SLC6A4, SLC8A1, SLC8A3, SLC9B2]
6	GO:0022853	active monoatomic ion transmembrane transporter activity	Metabolism, Transport & Homeostasis	0.00543627	14	2.48081	[ATP1B1, ATP2B1, NDUFS8, SLC12A3, SLC24A4, SLC24A5, SLC26A6, SLC4A1, SLC4A8, SLC5A7, SLC6A4, SLC8A1, SLC8A3, SLC9B2]
6	GO:0022890	inorganic cation transmembrane transporter activity	Metabolism, Transport & Homeostasis	0.000566259	32	2.10958	[ADRB2, AHNAK, ANK3, ATP1B1, ATP2B1, CACNA1H, CACNB3, CLIC2, CNNM4, GRIN2B, KCNG2, KCNJ1, KCNK2, KCNK4, KCNN2, NDUFS8, PDE4B, RHAG, SHANK1, SLC12A3, SLC24A4, SLC24A5, SLC4A8, SLC5A7, SLC6A4, SLC8A1, SLC8A3, SLC9B2, STK39, TRPC7, TRPM4, TRPV6]
6	GO:0030001	metal ion transport	Metabolism, Transport & Homeostasis	2.02044e-05	40	2.39955	[ADRB2, AHNAK, AKAP7, ANK3, ATP1B1, ATP2B1, CACNA1H, CACNB3, CAMK2B, CLIC2, CNGA2, CNNM4, GP1BA, GRIN2B, HOMER1, HOMER2, KCNG2, KCNJ1, KCNK2, KCNK4, KCNN2, LGALS3, P2RX3, PDE4B, PLCL1, SLC12A3, SLC24A4, SLC24A5, SLC4A8, SLC5A7, SLC6A4, SLC8A1, SLC8A3, SLC9B2, STK39, TFRC, TRPC7, TRPM4, TRPV6, WNK4]
6	GO:0032412	regulation of monoatomic ion transmembrane transporter activity	Metabolism, Transport & Homeostasis	0.0210062	8	2.63004	[AHNAK, ANK3, CACNB3, CLIC2, HOMER1, SHANK1, SLC6A4, STK39]
6	GO:0032414	positive regulation of ion transmembrane transporter activity	Metabolism, Transport & Homeostasis	0.0452996	4	3.22391	[ANK3, CACNB3, SLC6A4, STK39]
6	GO:0060048	cardiac muscle contraction	Metabolism, Transport & Homeostasis	0.0101115	8	3.14776	[ADRA1A, ATP1B1, CLIC2, GJD3, KCNN2, PDE4B, SLC8A1, TRPM4]
6	GO:0086065	cell communication involved in cardiac conduction	Metabolism, Transport & Homeostasis	0.00490641	6	4.83587	[ATP1B1, GJD3, IRX3, KCNN2, SLC8A1, TRPM4]
6	GO:0098659	inorganic cation import across plasma membrane	Metabolism, Transport & Homeostasis	0.00269466	9	3.8439	[ATP1B1, CACNA1H, KCNJ1, SLC12A3, SLC24A4, SLC8A1, SLC8A3, TRPM4, TRPV6]
6	GO:1902476	chloride transmembrane transport	Metabolism, Transport & Homeostasis	0.00146396	10	3.90396	[CLCN2, CLIC2, GABRA4, KCNK2, OCA2, SLC12A3, SLC26A6, SLC4A1, SLC4A8, SLC6A4]
6	GO:1904062	regulation of monoatomic cation transmembrane transport	Metabolism, Transport & Homeostasis	0.00282708	14	2.74349	[AHNAK, AKAP7, ANK3, ATP1B1, CACNB3, CLIC2, GRIN2B, HOMER1, KCNN2, P2RX3, PDE4B, SLC6A4, SLC8A1, STK39]
6	GO:0005216	monoatomic ion channel activity	Metabolism, Transport & Homeostasis	0.000151137	30	2.44156	[ADRB2, AHNAK, ANK3, CACNA1H, CACNB3, CHRNA10, CLCN2, CLIC2, CNGA2, GABRA4, GRIN2B, HOMER1, KCNG2, KCNJ1, KCNK2, KCNK4, KCNN2, LRRC8C, OCA2, P2RX3, PDE4B, PIEZO2, SHANK1, SLC24A4, SLC24A5, SLC6A4, TRPC7, TRPM4, TRPV6, WNK4]
6	GO:0006942	regulation of striated muscle contraction	Metabolism, Transport & Homeostasis	0.00498954	7	4.16422	[ADRA1A, ATP1B1, CLIC2, PDE4B, SLC8A1, SLC8A3, TRPM4]
6	GO:0042310	vasoconstriction	Metabolism, Transport & Homeostasis	0.00198923	6	6.24633	[ADRA1A, ATP2B1, KEL, SLC8A1, SVEP1, TRPM4]
6	GO:0051928	positive regulation of calcium ion transport	Metabolism, Transport & Homeostasis	0.0488768	5	2.65801	[ATP2B1, CACNB3, LGALS3, P2RX3, SLC6A4]
6	GO:0061337	cardiac conduction	Metabolism, Transport & Homeostasis	0.00320891	8	4.07924	[ATP1B1, ATP2B1, GJD3, IRX3, KCNN2, SLC8A1, SLC8A3, TRPM4]
6	GO:1904064	positive regulation of cation transmembrane transport	Metabolism, Transport & Homeostasis	0.0465937	6	2.43759	[AKAP7, ANK3, ATP1B1, CACNB3, P2RX3, SLC6A4]
6	GO:0035725	sodium ion transmembrane transport	Metabolism, Transport & Homeostasis	0.00134308	14	3.06837	[ANK3, ATP1B1, CNNM4, SLC12A3, SLC24A4, SLC24A5, SLC4A8, SLC5A7, SLC6A4, SLC8A1, SLC8A3, SLC9B2, STK39, TRPM4]
6	GO:0070588	calcium ion transmembrane transport	Metabolism, Transport & Homeostasis	0.000922385	18	2.73396	[AHNAK, ATP2B1, CACNA1H, CACNB3, CLIC2, GP1BA, GRIN2B, P2RX3, PDE4B, PLCL1, SLC24A4, SLC24A5, SLC6A4, SLC8A1, SLC8A3, TRPC7, TRPM4, TRPV6]
6	GO:0071805	potassium ion transmembrane transport	Metabolism, Transport & Homeostasis	0.0024543	13	2.95281	[ADRB2, AKAP7, ANK3, ATP1B1, KCNG2, KCNJ1, KCNK2, KCNK4, KCNN2, SLC12A3, SLC24A4, SLC24A5, STK39]
6	GO:0006813	potassium ion transport	Metabolism, Transport & Homeostasis	0.0014805	14	3.01547	[ADRB2, AKAP7, ANK3, ATP1B1, CNGA2, KCNG2, KCNJ1, KCNK2, KCNK4, KCNN2, SLC12A3, SLC24A4, SLC24A5, STK39]
6	GO:0006814	sodium ion transport	Metabolism, Transport & Homeostasis	0.000576511	16	3.14776	[ANK3, ATP1B1, CNGA2, CNNM4, SLC12A3, SLC24A4, SLC24A5, SLC4A8, SLC5A7, SLC6A4, SLC8A1, SLC8A3, SLC9B2, STK39, TRPM4, WNK4]
6	GO:0006816	calcium ion transport	Metabolism, Transport & Homeostasis	0.000143519	23	2.90234	[AHNAK, ATP2B1, CACNA1H, CACNB3, CAMK2B, CLIC2, CNGA2, GP1BA, GRIN2B, HOMER1, HOMER2, LGALS3, P2RX3, PDE4B, PLCL1, SLC24A4, SLC24A5, SLC6A4, SLC8A1, SLC8A3, TRPC7, TRPM4, TRPV6]
6	GO:0015108	chloride transmembrane transporter activity	Metabolism, Transport & Homeostasis	0.00330093	9	3.65639	[CLCN2, CLIC2, GABRA4, OCA2, SLC12A3, SLC26A6, SLC4A1, SLC4A8, SLC6A4]
6	GO:0015297	antiporter activity	Metabolism, Transport & Homeostasis	0.00215804	9	4.0155	[SLC24A4, SLC24A5, SLC26A6, SLC4A1, SLC4A8, SLC6A4, SLC8A1, SLC8A3, SLC9B2]
6	GO:0022836	gated channel activity	Metabolism, Transport & Homeostasis	0.00121228	19	2.56606	[AHNAK, ANK3, CACNA1H, CACNB3, CHRNA10, CLCN2, CLIC2, CNGA2, GABRA4, GRIN2B, KCNJ1, KCNK2, KCNK4, KCNN2, P2RX3, PIEZO2, SHANK1, SLC6A4, TRPM4]
6	GO:0042626	ATPase-coupled transmembrane transporter activity	Metabolism, Transport & Homeostasis	0.0246813	6	2.99824	[ABCB1, ABCC1, ABCC2, ABCG2, ATP1B1, ATP2B1]
6	GO:0043266	regulation of potassium ion transport	Metabolism, Transport & Homeostasis	0.030213	5	3.20325	[AKAP7, ANK3, ATP1B1, KCNN2, STK39]
6	GO:0046873	metal ion transmembrane transporter activity	Metabolism, Transport & Homeostasis	0.00014781	29	2.48142	[ADRB2, AHNAK, ANK3, ATP1B1, ATP2B1, CACNA1H, CACNB3, CLIC2, CNNM4, GRIN2B, KCNG2, KCNJ1, KCNK2, KCNK4, KCNN2, PDE4B, SLC12A3, SLC24A4, SLC24A5, SLC4A8, SLC5A7, SLC6A4, SLC8A1, SLC8A3, SLC9B2, STK39, TRPC7, TRPM4, TRPV6]
6	GO:0051924	regulation of calcium ion transport	Metabolism, Transport & Homeostasis	0.00250784	12	3.10698	[AHNAK, ATP2B1, CACNB3, CAMK2B, CLIC2, HOMER1, HOMER2, LGALS3, P2RX3, PDE4B, SLC6A4, SLC8A1]
6	GO:0055117	regulation of cardiac muscle contraction	Metabolism, Transport & Homeostasis	0.00636004	6	4.54279	[ADRA1A, ATP1B1, CLIC2, PDE4B, SLC8A1, TRPM4]
6	GO:0086064	cell communication by electrical coupling involved in cardiac conduction	Metabolism, Transport & Homeostasis	0.00668805	4	7.13867	[ATP1B1, GJD3, IRX3, SLC8A1]
6	GO:1903779	regulation of cardiac conduction	Metabolism, Transport & Homeostasis	0.0053644	4	7.6878	[ATP2B1, SLC8A1, SLC8A3, TRPM4]
6	GO:0005261	monoatomic cation channel activity	Metabolism, Transport & Homeostasis	0.000531007	24	2.47278	[ADRB2, AHNAK, ANK3, CACNA1H, CACNB3, CHRNA10, CLIC2, CNGA2, GRIN2B, HOMER1, KCNG2, KCNJ1, KCNK2, KCNK4, KCNN2, P2RX3, PDE4B, PIEZO2, SLC24A4, SLC24A5, SLC6A4, TRPC7, TRPM4, TRPV6]
6	GO:0015079	potassium ion transmembrane transporter activity	Metabolism, Transport & Homeostasis	0.00344858	12	2.92511	[ADRB2, ANK3, ATP1B1, KCNG2, KCNJ1, KCNK2, KCNK4, KCNN2, SLC12A3, SLC24A4, SLC24A5, STK39]
6	GO:0015081	sodium ion transmembrane transporter activity	Metabolism, Transport & Homeostasis	0.00091858	14	3.22391	[ANK3, ATP1B1, CNNM4, SLC12A3, SLC24A4, SLC24A5, SLC4A8, SLC5A7, SLC6A4, SLC8A1, SLC8A3, SLC9B2, STK39, TRPM4]
6	GO:0015085	calcium ion transmembrane transporter activity	Metabolism, Transport & Homeostasis	0.000922972	14	3.2539	[AHNAK, ATP2B1, CACNA1H, CACNB3, CLIC2, GRIN2B, PDE4B, SLC24A4, SLC24A5, SLC6A4, SLC8A1, SLC8A3, TRPC7, TRPV6]
6	GO:0060291	long-term synaptic potentiation	Metabolism, Transport & Homeostasis	0.0452996	4	3.22391	[CAMK2B, GRIN2B, SLC24A4, SLC8A3]
6	GO:0140828	metal cation:monoatomic cation antiporter activity	Metabolism, Transport & Homeostasis	0.00422118	5	6.24633	[SLC24A4, SLC24A5, SLC8A1, SLC8A3, SLC9B2]
6	GO:1901379	regulation of potassium ion transmembrane transport	Metabolism, Transport & Homeostasis	0.0208664	5	3.67431	[AKAP7, ANK3, ATP1B1, KCNN2, STK39]
6	GO:1903169	regulation of calcium ion transmembrane transport	Metabolism, Transport & Homeostasis	0.0326732	7	2.49853	[AHNAK, CACNB3, CLIC2, P2RX3, PDE4B, SLC6A4, SLC8A1]
6	GO:0097553	calcium ion transmembrane import into cytosol	Metabolism, Transport & Homeostasis	0.00114861	12	3.52734	[CACNA1H, CACNB3, CLIC2, GP1BA, GRIN2B, P2RX3, PLCL1, SLC24A4, SLC6A4, SLC8A1, SLC8A3, TRPV6]
6	GO:0005244	voltage-gated monoatomic ion channel activity	Metabolism, Transport & Homeostasis	0.013443	10	2.54952	[AHNAK, ANK3, CACNA1H, CACNB3, CLCN2, GRIN2B, KCNJ1, KCNK2, KCNK4, KCNN2]
6	GO:0015276	ligand-gated monoatomic ion channel activity	Metabolism, Transport & Homeostasis	0.01499	11	2.35913	[CHRNA10, CLIC2, CNGA2, GABRA4, GRIN2B, KCNJ1, KCNN2, P2RX3, SHANK1, SLC6A4, TRPM4]
6	GO:0022832	voltage-gated channel activity	Metabolism, Transport & Homeostasis	0.0137209	10	2.53658	[AHNAK, ANK3, CACNA1H, CACNB3, CLCN2, GRIN2B, KCNJ1, KCNK2, KCNK4, KCNN2]
6	GO:0022834	ligand-gated channel activity	Metabolism, Transport & Homeostasis	0.00768014	12	2.5626	[CHRNA10, CLIC2, CNGA2, GABRA4, GRIN2B, KCNJ1, KCNK2, KCNN2, P2RX3, SHANK1, SLC6A4, TRPM4]
6	GO:0070509	calcium ion import	Metabolism, Transport & Homeostasis	0.00228745	7	5.06949	[CACNA1H, LGALS3, SLC24A4, SLC24A5, SLC8A1, SLC8A3, TRPV6]
6	GO:0098703	calcium ion import across plasma membrane	Metabolism, Transport & Homeostasis	0.00422118	5	6.24633	[CACNA1H, SLC24A4, SLC8A1, SLC8A3, TRPV6]
6	GO:1901019	regulation of calcium ion transmembrane transporter activity	Metabolism, Transport & Homeostasis	0.0352528	4	3.56933	[AHNAK, CACNB3, CLIC2, SLC6A4]
6	GO:1902656	calcium ion import into cytosol	Metabolism, Transport & Homeostasis	0.00467272	5	6.09398	[CACNA1H, SLC24A4, SLC8A1, SLC8A3, TRPV6]
6	GO:2001257	regulation of cation channel activity	Metabolism, Transport & Homeostasis	0.0136644	6	3.61234	[AHNAK, ANK3, CACNB3, CLIC2, HOMER1, SLC6A4]
6	GO:0005262	calcium channel activity	Metabolism, Transport & Homeostasis	0.00517171	11	2.89304	[AHNAK, CACNA1H, CACNB3, CLIC2, GRIN2B, PDE4B, SLC24A4, SLC24A5, SLC6A4, TRPC7, TRPV6]
6	GO:0005267	potassium channel activity	Metabolism, Transport & Homeostasis	0.0494617	7	2.19997	[ADRB2, ANK3, KCNG2, KCNJ1, KCNK2, KCNK4, KCNN2]
6	GO:0015368	calcium:monoatomic cation antiporter activity	Metabolism, Transport & Homeostasis	0.000837126	4	15.3756	[SLC24A4, SLC24A5, SLC8A1, SLC8A3]
6	GO:0005432	calcium:sodium antiporter activity	Metabolism, Transport & Homeostasis	0.000392406	4	19.9883	[SLC24A4, SLC24A5, SLC8A1, SLC8A3]
6	GO:0022843	voltage-gated monoatomic cation channel activity	Metabolism, Transport & Homeostasis	0.0228937	8	2.5626	[AHNAK, ANK3, CACNA1H, CACNB3, KCNJ1, KCNK2, KCNK4, KCNN2]
6	GO:0099094	ligand-gated monoatomic cation channel activity	Metabolism, Transport & Homeostasis	0.0119604	9	2.79339	[CHRNA10, CLIC2, CNGA2, GRIN2B, KCNJ1, KCNN2, P2RX3, SLC6A4, TRPM4]
6	GO:0051591	response to cAMP	Regulation & Signalling	0.00667289	5	5.43159	[AKAP7, DMTN, IGFBP5, PDE2A, SLC26A6]
6	GO:0071320	cellular response to cAMP	Regulation & Signalling	0.00384814	5	6.4065	[AKAP7, DMTN, IGFBP5, PDE2A, SLC26A6]
6	GO:0019722	calcium-mediated signaling	Regulation & Signalling	0.000987677	14	3.19447	[ACKR3, ATP1B1, CAMTA1, CCL20, CD22, CLIC2, GRIN2B, HOMER2, P2RX3, SLC24A4, SLC6A4, SLC8A1, TRPM4, XCR1]
6	GO:0007186	G protein-coupled receptor signaling pathway	Regulation & Signalling	2.58089e-05	41	2.32554	[ACKR3, ADGRF5, ADGRG7, ADM2, ADRA1A, ADRB2, AGRP, AKAP12, DEPTOR, ECEL1, EEF1AKMT4-ECE2, FOXC1, FSHB, GP1BA, GPR174, GPR176, GPR21, GPR25, GPR52, GPR83, GPRC5C, GRK6, HOMER1, HOMER2, LHCGR, LPAR1, MPL, NPR3, P2RY13, PALM, PDE2A, PDE4B, PSAP, RAPGEF4, RASD1, RGS4, SLC24A4, SLIT1, SORT1, STK39, XCR1]
6	GO:0004930	G protein-coupled receptor activity	Regulation & Signalling	0.00503723	18	2.21545	[ACKR3, ADGRF5, ADGRG7, ADRA1A, ADRB2, GP1BA, GPR174, GPR176, GPR21, GPR25, GPR52, GPR83, GPRC5C, LHCGR, LPAR1, NPR3, P2RY13, XCR1]
6	GO:0008277	regulation of G protein-coupled receptor signaling pathway	Regulation & Signalling	0.0165523	8	2.77615	[ADRB2, GRK6, PALM, PDE2A, PDE4B, RGS4, SLC24A4, SLIT1]
6	GO:0045744	negative regulation of G protein-coupled receptor signaling pathway	Regulation & Signalling	0.0157783	5	4.02989	[ADRB2, PALM, PDE2A, PDE4B, SLIT1]
6	GO:0045744	negative regulation of G protein-coupled receptor signaling pathway	Regulation & Signalling	0.0157783	5	4.02989	[ADRB2, PALM, PDE2A, PDE4B, SLIT1]
6	GO:0019722	calcium-mediated signaling	Regulation & Signalling	0.000987677	14	3.19447	[ACKR3, ATP1B1, CAMTA1, CCL20, CD22, CLIC2, GRIN2B, HOMER2, P2RX3, SLC24A4, SLC6A4, SLC8A1, TRPM4, XCR1]
6	GO:0031644	regulation of nervous system process	Regulation & Signalling	0.012594	6	3.70153	[DLG4, GRIN2B, MYRF, SHANK1, SLC8A3, TMEM100]
6	GO:0023061	signal release	Regulation & Signalling	0.0192406	14	2.02193	[BRSK2, FOXO1, MAP4K2, NR1D1, OTOF, PTPRN2, RAB3GAP1, RAPGEF4, SLC4A8, SNAP25, STK39, SYT7, TBX3, TRPM4]
6	GO:0019722	calcium-mediated signaling	Regulation & Signalling	0.000987677	14	3.19447	[ACKR3, ATP1B1, CAMTA1, CCL20, CD22, CLIC2, GRIN2B, HOMER2, P2RX3, SLC24A4, SLC6A4, SLC8A1, TRPM4, XCR1]
6	GO:0008154	actin polymerization or depolymerization	Tissue & Cell Organization	0.0395269	7	2.36348	[ADD2, CDC42EP3, FHDC1, INF2, KANK4, MICAL2, SSH2]
6	GO:0030041	actin filament polymerization	Tissue & Cell Organization	0.0436898	6	2.49853	[ADD2, CDC42EP3, FHDC1, INF2, KANK4, SSH2]
6	GO:0030858	positive regulation of epithelial cell differentiation	Tissue Growth & Development	0.0313013	4	3.77137	[FOXC1, PROM1, TMEM100, TRIM16]
6	GO:0031346	positive regulation of cell projection organization	Tissue & Cell Organization	0.0145957	12	2.27139	[APBB1, ARAP1, CAMK2B, CDC42EP3, DLG4, GOLGA4, MACF1, PALM, RAB3IP, SLC6A4, TIAM1, TNN]
6	GO:0031346	positive regulation of cell projection organization	Tissue & Cell Organization	0.0145957	12	2.27139	[APBB1, ARAP1, CAMK2B, CDC42EP3, DLG4, GOLGA4, MACF1, PALM, RAB3IP, SLC6A4, TIAM1, TNN]
6	GO:0060491	regulation of cell projection assembly	Tissue & Cell Organization	0.0424863	9	2.05359	[ARAP1, CDC42EP3, DMTN, INTU, LPAR1, MAP4, PALM, RAB3IP, SLC6A4]
6	GO:0120032	regulation of plasma membrane bounded cell projection assembly	Tissue & Cell Organization	0.041801	9	2.06301	[ARAP1, CDC42EP3, DMTN, INTU, LPAR1, MAP4, PALM, RAB3IP, SLC6A4]
6	GO:0048762	mesenchymal cell differentiation	Tissue & Cell Organization	0.0402697	9	2.08211	[ERBB4, FOXC1, HAND2, NOG, PTK2, SEMA5B, SFRP2, TBX3, TIAM1]
6	GO:0031346	positive regulation of cell projection organization	Tissue & Cell Organization	0.0145957	12	2.27139	[APBB1, ARAP1, CAMK2B, CDC42EP3, DLG4, GOLGA4, MACF1, PALM, RAB3IP, SLC6A4, TIAM1, TNN]
6	GO:0060491	regulation of cell projection assembly	Tissue & Cell Organization	0.0424863	9	2.05359	[ARAP1, CDC42EP3, DMTN, INTU, LPAR1, MAP4, PALM, RAB3IP, SLC6A4]
6	GO:0120032	regulation of plasma membrane bounded cell projection assembly	Tissue & Cell Organization	0.041801	9	2.06301	[ARAP1, CDC42EP3, DMTN, INTU, LPAR1, MAP4, PALM, RAB3IP, SLC6A4]
[truncated: 1,966 more rows]

## Sheet: Supplementary Table 4
Supplementary Table 4
[truncated: 1,055 more rows]

[truncated: 2 more sheets: Supplementary Table 5, Supplementary Table 6]
