# Supplementary material
Source: Research Square preprint supplement (doi:10.21203/rs.3.rs-9689802/v1)
Supplement: Supplementary file 1 [file 42182979480e033ee2c5709e.docx]

**Supplementary Figures**

**Supplementary Figure 1.** Line plot showing log2-transformed fold-changes in gene expression derived from RNA-seq and RT-qPCR analyses for the differentially expressed genes selected for validation. Each point represents a gene × time combination. The solid line indicates the linear regression between datasets, with the shaded area representing the 95% confidence interval. The regression equation and R² value are shown in the top-left corner.

**Supplementary Figure 2.** The interbranchial septum’s contribution to each sample’s total RNA pool would inevitably be inversely proportional to the degree of gill filament regeneration. This enrichment of septum RNA in the Resected group samples compared with those of the Control group would have confounded the results of the RNA-Seq experiment. Therefore, the gill filaments collected from the salmon of the Control group were trimmed to match the filament length-to-septum length proportion of their counterparts from the Resected group. For the Control group filaments trimming, first, the lengths of the gill septum and resected filaments were measured for all the Resected group samples. For each sample, the difference between the length of the resected filaments (average) and the septum (Δlengthfilament-septum) was calculated and statistically analyzed for changes among sampling time points. (A) Bar plot representing the average Δlengthfilament-septum across time points. Δlengthfilament-septum did not differ significantly among Week 1-Week 8 samples, but these were significantly smaller than those of Week 16 and Week 20. Δlengthfilament-septum in Week 12 samples were significantly higher than those of Week 1, significantly lower than those of Week 16 and Week 20, but not significantly different to those of Week 2-Week 8 [although with relatively low p-values (between 0.053 and 0.19)]. No differences were observed in the Δlengthfilament-septum between Week 16 and Week 20 samples. Based on these observations, equivalences between the length of the septum and Δlengthfilament-septum were established, and these varied among the time groups. For Week 1-Week 8, the Δlengthfilament-septum was set at 0.35 times the septum’s length. For Week 12, the Δlengthfilament-septum was 0.45 times the septum’s length. Finally, for Week 16 and Week 20, the Δlengthfilament-septum equated to 0.7 times the septum’s length. The Control group filaments were trimmed using the above criterion. (B) Schematic representation of trimmed Control filaments relative to Resected filaments, illustrating the intended normalisation of septum contribution to the mRNA pool across samples.
